# Supplementary material for: Factors associated with attrition in a longitudinal online study: results from the HaBIDS panel
Source: PubMed Central journal article supplement (PMC5580321; doi:10.1186/s12874-017-0408-3), 2017-08-31
Supplement: 12874_2017_408_MOESM1_ESM.pdf [file 12874_2017_408_MOESM1_ESM.pdf]

Article title: **Factors associated with attrition in a longitudinal online study: results from the HaBIDS panel**

Authors: Nicole Rübsamen; Manas K Akmatov; Stefanie Castell; André Karch; Rafael T. Mikolajczyk

Journal: BMC Medical Research Methodology

**Additional file 1 – Timing and topics of all questionnaires in the HaBIDS study**

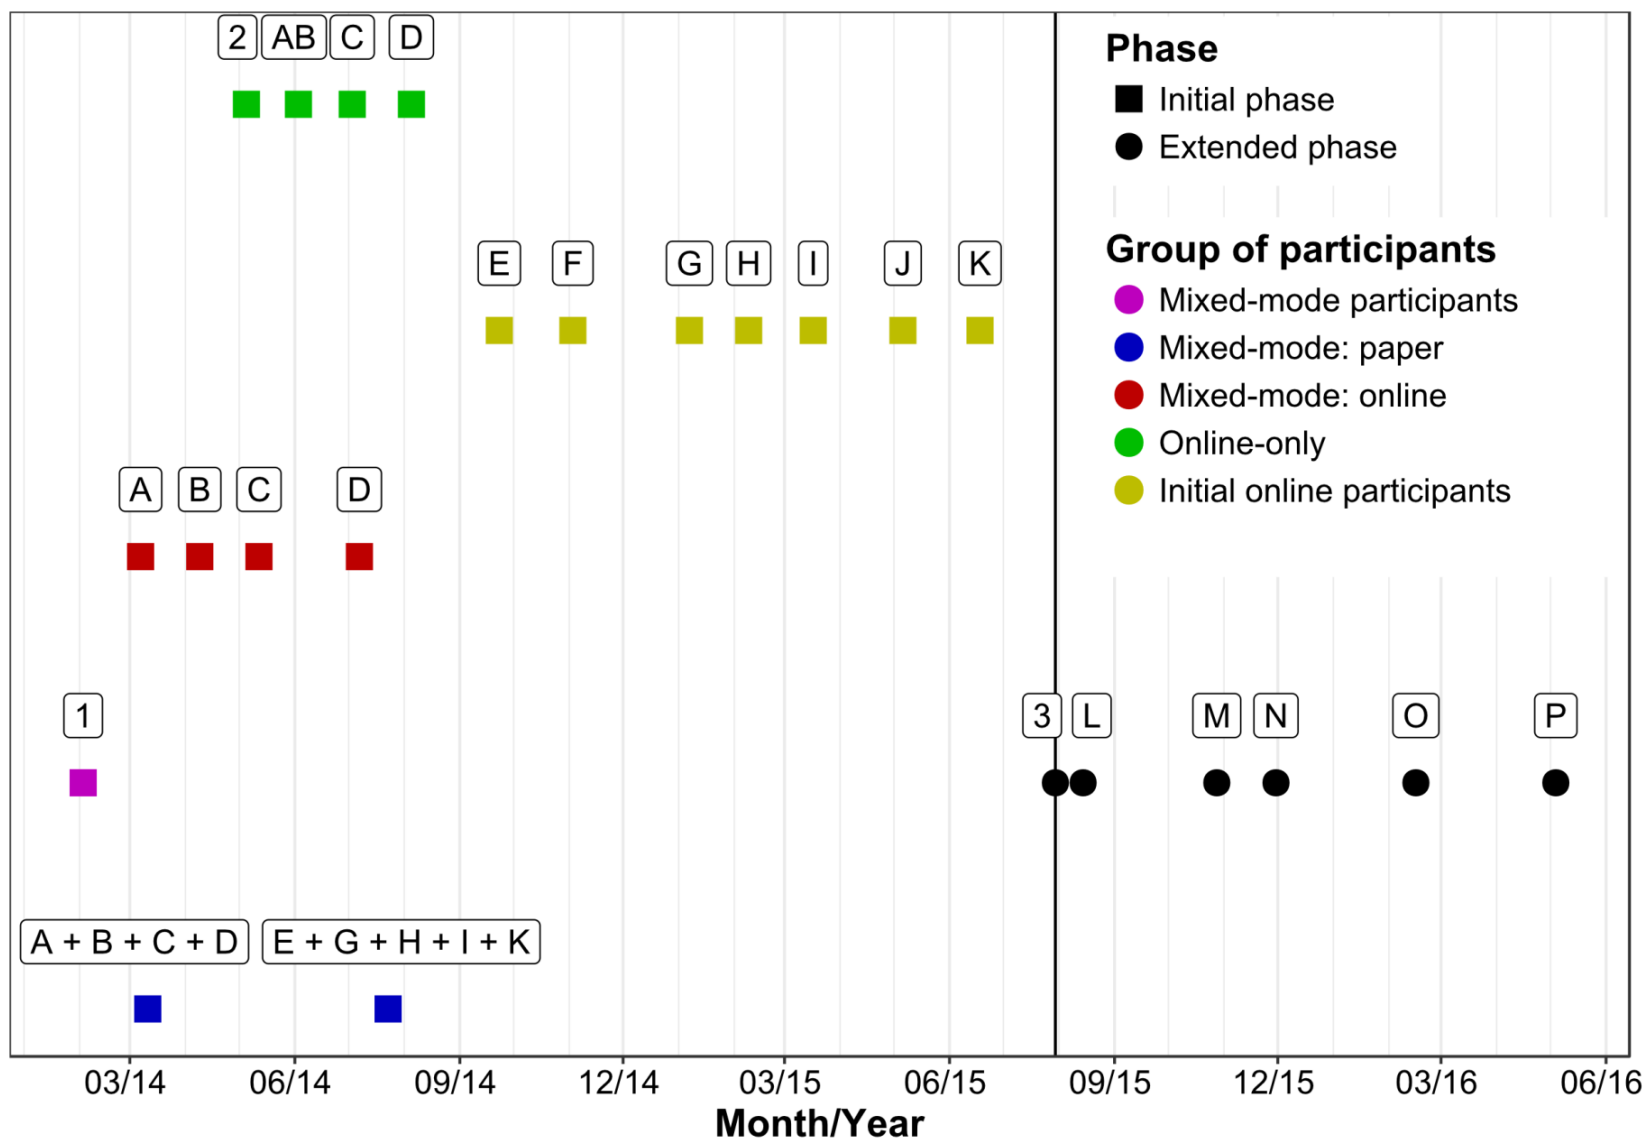

| Questionnaire           | Topic                                                                                                                                    | Participation (% of individuals who received respective invitation email) <sup>a</sup> | % of participants who received reminder | Number of questions                |
|-------------------------|------------------------------------------------------------------------------------------------------------------------------------------|----------------------------------------------------------------------------------------|-----------------------------------------|------------------------------------|
| 1                       | First wave of initial invitation to HaBIDS panel (16,895 potential participants living in Braunschweig, Wendeburg, Bortfeld, and Vechta) |                                                                                        |                                         |                                    |
| 2                       | Second wave of initial invitation to HaBIDS panel (10,000 potential participants living in Salzgitter and Wolfenbüttel)                  |                                                                                        |                                         |                                    |
| A                       | Frequency of infections and infection-associated symptoms in the last 12 months                                                          | 100% (by definition)                                                                   | 2%                                      | 11                                 |
| AB                      | Frequency of infections and infection-associated symptoms in the last 12 months; health & sociodemographic data                          | 100% (by definition)                                                                   | 19%                                     | 11 + 18                            |
| B                       | Health & sociodemographic data                                                                                                           | 98%                                                                                    | 14%                                     | 18                                 |
| C (mixed-mode)          | Prevention measures against respiratory infections                                                                                       | 93%                                                                                    | 18%                                     | 36                                 |
| C (online-only)         | Determinants for participation in community-based cohorts on infectious diseases                                                         | 70%                                                                                    | no reminders sent                       | 23                                 |
| D (mixed-mode)          | Social contact patterns (summer)                                                                                                         | 60%                                                                                    | 57%                                     | 7 + up to 72 contacts <sup>b</sup> |
| D (online-only)         | Prevention measures against respiratory infections                                                                                       | 76%                                                                                    | no reminders sent                       | 36                                 |
| E                       | Adult vaccinations                                                                                                                       | 78%                                                                                    | 40%                                     | 24                                 |
| F (online participants) | Ebola risk perception                                                                                                                    | 81%                                                                                    | 40%                                     | 27                                 |
| G                       | Tick-borne infections                                                                                                                    | 78%                                                                                    | 36%                                     | 49                                 |
| H                       | Antibiotics                                                                                                                              | 80%                                                                                    | 37%                                     | 23                                 |
| I                       | Social contact patterns (winter)                                                                                                         | 68%                                                                                    | 46%                                     | 7 + up to 72 contacts <sup>b</sup> |
| J (online participants) | Frequency of infections during the winter season & influenza vaccination (season 2014/15)                                                | 74%                                                                                    | 42%                                     | 40                                 |
| K                       | Sexual contact patterns & medical history                                                                                                | 75%                                                                                    | 37%                                     | 38                                 |

| <b>Questionnaire</b> | <b>Topic</b>                                                                              | <b>Participation (% of individuals who received respective invitation email)<sup>a</sup></b> | <b>% of participants who received reminder</b> | <b>Number of questions</b> |
|----------------------|-------------------------------------------------------------------------------------------|----------------------------------------------------------------------------------------------|------------------------------------------------|----------------------------|
| 3                    | Invitation to continue with the HaBIDS panel                                              |                                                                                              |                                                |                            |
| L                    | Ebola risk perception (follow-up)                                                         | 100% (by definition)                                                                         | 10%                                            | 27                         |
| M                    | Tick-borne infections (follow-up)                                                         | 80%                                                                                          | no reminders sent                              | 23                         |
| N                    | Multi-drug resistant pathogens                                                            | 93%                                                                                          | 12%                                            | 27                         |
| O                    | Fair allocation of scarce medical resources                                               | 92%                                                                                          | 21%                                            | 12                         |
| P                    | Frequency of infections during the winter season & influenza vaccination (season 2015/16) | 87%                                                                                          | 18%                                            | 40                         |

<sup>a</sup>Numerator does not include participants who had withdrawn before the respective questionnaire or for whom email delivery failed.

<sup>b</sup>Participants were asked to fill in all contacts that they had made within 24 hours.
