# Supplementary material for: Factors associated with attrition in a longitudinal online study: results from the HaBIDS panel
Source: PubMed Central journal article supplement (PMC5580321; doi:10.1186/s12874-017-0408-3), 2017-08-31
Supplement: 12874_2017_408_MOESM2_ESM.pdf [file 12874_2017_408_MOESM2_ESM.pdf]

Article title:

**Factors associated with attrition in a longitudinal online study: results from the HaBIDS panel**

Authors: Nicole RübSamen; Manas K Akmatov; Stefanie Castell; André Karch; Rafael T. Mikolajczyk

Journal: BMC Medical Research Methodology

**Additional file 2 – English translation of the questionnaires**

*(German questionnaires translated into English; English versions not validated for use in surveys)*

|                                                                                                             |           |
|-------------------------------------------------------------------------------------------------------------|-----------|
| <b>A: Frequency of infections and infection-associated symptoms in the last 12 months</b> .....             | <b>6</b>  |
| 1: General information .....                                                                                | 6         |
| 2: Infections .....                                                                                         | 7         |
| 3: Infections (continued) .....                                                                             | 8         |
| <b>B: Health &amp; sociodemographic data</b> .....                                                          | <b>9</b>  |
| 1: General health and well-being .....                                                                      | 9         |
| 2: General information .....                                                                                | 10        |
| 3: Education and profession .....                                                                           | 11        |
| 4: Internet .....                                                                                           | 12        |
| 5: Pets .....                                                                                               | 13        |
| <b>C (mixed-mode) / D (online-only): Prevention measures against respiratory infections</b> .....           | <b>14</b> |
| 1: Preventing respiratory infections.....                                                                   | 14        |
| 2: Measures.....                                                                                            | 15        |
| 3: Behavior during cold time .....                                                                          | 16        |
| 4: Other measures.....                                                                                      | 17        |
| <b>C (online-only): Determinants for participation in community-based cohorts on infectious diseases ..</b> | <b>18</b> |
| 1: Report on disease signs .....                                                                            | 18        |
| 2: Report on disease signs (continued).....                                                                 | 19        |
| 3: Record location .....                                                                                    | 20        |
| 4: Biological samples.....                                                                                  | 21        |
| 5: Data protection .....                                                                                    | 22        |
| 6: Motivation .....                                                                                         | 23        |
| 7: Percentage of participation .....                                                                        | 24        |
| 8: Acceptance of blood sampling .....                                                                       | 25        |
| 9: Study center .....                                                                                       | 26        |
| 10: Household .....                                                                                         | 27        |
| 11: Participation of children .....                                                                         | 28        |
| 12: Remarks .....                                                                                           | 29        |
| <b>D (mixed-mode): Social contact patterns (summer)</b> .....                                               | <b>30</b> |
| 1: Household .....                                                                                          | 30        |
| 2: Regular contacts in work / education / school .....                                                      | 31        |
| 3: Interpersonal contacts in leisure time.....                                                              | 32        |
| 4: 1st contact person .....                                                                                 | 33        |
| 5: 2nd contact person .....                                                                                 | 33        |
| .....                                                                                                       | 33        |
| 75: 72nd contact person .....                                                                               | 33        |
| 76: Thank you for your participation.....                                                                   | 34        |

|                                                                |           |
|----------------------------------------------------------------|-----------|
| <b>E: Adult vaccinations.....</b>                              | <b>35</b> |
| 1: Vaccinations .....                                          | 35        |
| 2: Influenza.....                                              | 36        |
| 3: Vaccination boosts .....                                    | 37        |
| 4: Vaccination card.....                                       | 38        |
| 5: Official recommendations .....                              | 39        |
| 6: Vaccinations for adults.....                                | 40        |
| 7: Attitude .....                                              | 41        |
| 8: HPV.....                                                    | 42        |
| 9: HPV children .....                                          | 43        |
| <b>F: Ebola risk perception .....</b>                          | <b>44</b> |
| 1: Ebola virus disease .....                                   | 44        |
| 2: Probability of acquiring Ebola .....                        | 45        |
| 3: Probability of acquiring Ebola (continued).....             | 46        |
| 4: Probability of acquiring Ebola (continued).....             | 47        |
| 5: Personal behavior and prevention measures.....              | 48        |
| 6: Personal behavior and prevention measures (continued) ..... | 49        |
| 7: Personal behavior and prevention measures (continued) ..... | 50        |
| 8: Personal behavior and prevention measures (continued) ..... | 51        |
| 9: Personal commitment.....                                    | 52        |
| 10: Vaccination.....                                           | 53        |
| 11: Activities about Ebola .....                               | 54        |
| <b>G: Tick-borne infections .....</b>                          | <b>55</b> |
| 1: Devices used.....                                           | 55        |
| 2.....                                                         | 56        |
| 3.....                                                         | 57        |
| 4.....                                                         | 58        |
| 5.....                                                         | 59        |
| 6.....                                                         | 60        |
| 7.....                                                         | 61        |
| 8.....                                                         | 62        |
| <b>H: Antibiotics.....</b>                                     | <b>63</b> |
| 1: Questions about antibiotics.....                            | 63        |
| 2: Knowledge.....                                              | 64        |
| 3.....                                                         | 65        |
| 4.....                                                         | 66        |
| 5: Remarks.....                                                | 67        |
| <b>I: Social contact patterns (winter).....</b>                | <b>68</b> |
| 1: Regular contacts in work / education / school .....         | 68        |
| 2: How to register your contacts .....                         | 69        |
| 3: Interpersonal contacts in leisure time.....                 | 70        |
| 4: Contacts 1 - 10 .....                                       | 71        |
| 5: Contacts 11 - 20 .....                                      | 71        |

|                                                                                                               |            |
|---------------------------------------------------------------------------------------------------------------|------------|
| .....                                                                                                         | 71         |
| 10: Contacts 61 - 70 .....                                                                                    | 72         |
| 11: Thank you for your participation.....                                                                     | 72         |
| <b>J: Frequency of infections during the winter season &amp; influenza vaccination (season 2014/15) .....</b> | <b>73</b>  |
| 1: Signs and symptoms .....                                                                                   | 73         |
| 2: Seeking medical advice .....                                                                               | 74         |
| 3: Characteristics of the disease.....                                                                        | 75         |
| 4: Household .....                                                                                            | 76         |
| 5: Household II .....                                                                                         | 77         |
| 6: Influenza vaccination .....                                                                                | 78         |
| 7: Influenza vaccination II .....                                                                             | 79         |
| 8: Influenza vaccination III .....                                                                            | 80         |
| 9: Reason for influenza vaccination .....                                                                     | 81         |
| 10: Statements about influenza vaccination.....                                                               | 82         |
| 11: Recommendation influenza vaccination.....                                                                 | 83         |
| 12: Outlook influenza vaccination .....                                                                       | 84         |
| <b>K: Sexual contact patterns &amp; medical history.....</b>                                                  | <b>85</b>  |
| 1: Information about yourself and general health .....                                                        | 85         |
| 2: Known diseases .....                                                                                       | 86         |
| 3: Cardiovascular diseases.....                                                                               | 87         |
| 4: Cancer.....                                                                                                | 89         |
| 5: Metabolic diseases .....                                                                                   | 96         |
| 6: Musculoskeletal diseases .....                                                                             | 98         |
| 7: Lung diseases .....                                                                                        | 99         |
| 8: Allergies .....                                                                                            | 100        |
| 9: Gastrointestinal or liver diseases .....                                                                   | 102        |
| 10: Skin diseases .....                                                                                       | 103        |
| 11: Kidney diseases .....                                                                                     | 104        |
| 12: Neurological diseases.....                                                                                | 105        |
| 13: Psychiatric diseases .....                                                                                | 106        |
| 14: Other diseases .....                                                                                      | 107        |
| 15: Seeking medical advice .....                                                                              | 108        |
| 16: Smoking .....                                                                                             | 109        |
| 17: Alcohol consumption .....                                                                                 | 111        |
| 18: Sexual contacts .....                                                                                     | 112        |
| 19: Contacts with persons of the opposite sex.....                                                            | 113        |
| 20: Contacts with persons of the same sex .....                                                               | 114        |
| 21: Age of contact persons .....                                                                              | 115        |
| 22: Contacts of the partner .....                                                                             | 116        |
| 23: Submit questionnaire.....                                                                                 | 117        |
| <b>L: Ebola risk perception (follow-up) .....</b>                                                             | <b>118</b> |
| 1: Ebola virus disease .....                                                                                  | 118        |
| 2: Ebola virus disease (continued).....                                                                       | 119        |

|                                                                                                               |            |
|---------------------------------------------------------------------------------------------------------------|------------|
| 3: Probability of acquiring Ebola .....                                                                       | 120        |
| 4: Probability of acquiring Ebola (continued).....                                                            | 121        |
| 5: Probability of acquiring Ebola (continued).....                                                            | 122        |
| 6: Personal behavior and prevention measures.....                                                             | 123        |
| 7: Personal behavior and prevention measures (continued) .....                                                | 124        |
| 8: Personal behavior and prevention measures (continued) .....                                                | 125        |
| 9: Personal commitment.....                                                                                   | 126        |
| 10: Personal commitment (continued) .....                                                                     | 127        |
| 11: Vaccination.....                                                                                          | 128        |
| 12: Activities about Ebola .....                                                                              | 129        |
| <b>M: Tick-borne infections (follow-up).....</b>                                                              | <b>130</b> |
| 1: Fear.....                                                                                                  | 130        |
| 2: Prevention – tick vaccination .....                                                                        | 131        |
| 3: Prevention – why tick vaccination? .....                                                                   | 132        |
| 4: Tick bites .....                                                                                           | 133        |
| 5: Seeking medical advice .....                                                                               | 134        |
| 6: Last time doctor .....                                                                                     | 135        |
| 7: Suspicion of borreliosis.....                                                                              | 136        |
| 8: Diagnosis of borreliosis.....                                                                              | 137        |
| 9: Suspicion of TBE .....                                                                                     | 138        |
| 10: Other disease .....                                                                                       | 139        |
| <b>N: Multi-drug resistant pathogens .....</b>                                                                | <b>140</b> |
| 1: Start.....                                                                                                 | 140        |
| 2: General .....                                                                                              | 141        |
| 3: Opinion.....                                                                                               | 142        |
| 4: Reasons .....                                                                                              | 143        |
| 5: Animal breeding.....                                                                                       | 144        |
| 6: Dissemination and responsibility.....                                                                      | 145        |
| 7: Case study 1 .....                                                                                         | 146        |
| 8: Case study 2 .....                                                                                         | 147        |
| <b>O: Fair allocation of scarce medical resources .....</b>                                                   | <b>148</b> |
| 1: Randomisation .....                                                                                        | 148        |
| 2: Distribution of medical services .....                                                                     | 149        |
| 3: Distribution problem (alternative 1) .....                                                                 | 150        |
| 4: Distribution problem (alternative 1) .....                                                                 | 151        |
| 3: Distribution problem (alternative 2) .....                                                                 | 152        |
| 4: Distribution problem (alternative 2) .....                                                                 | 153        |
| 5: Question about distribution problem .....                                                                  | 154        |
| <b>P: Frequency of infections during the winter season &amp; influenza vaccination (season 2015/16) .....</b> | <b>155</b> |
| 1: Signs and symptoms .....                                                                                   | 155        |
| 2: Seeking medical advice .....                                                                               | 156        |
| 3: Characteristics of the disease.....                                                                        | 157        |
| 4: Household .....                                                                                            | 158        |

|                                                 |     |
|-------------------------------------------------|-----|
| 5: Household II .....                           | 159 |
| 6: Influenza vaccination .....                  | 160 |
| 7: Influenza vaccination II .....               | 161 |
| 8: Influenza vaccination III .....              | 162 |
| 9: Reason for influenza vaccination .....       | 163 |
| 10: Statements about influenza vaccination..... | 164 |
| 11: Recommendation influenza vaccination.....   | 165 |
| 12: Outlook influenza vaccination .....         | 166 |

- ▼ indicates that the question is displayed only if the respective condition is met.
- [] Variable names are written in square brackets. They are not visible for the participants.

# A: Frequency of infections and infection-associated symptoms in the last 12 months

## 1: General information

First of all, we need two details about you, so that we can adapt the following questions for you.

[age] How old are you?  
*enter your answer here*

[sex] What is your gender?

- Male
- Female

## 2: Infections

In the following section we ask you to estimate how often you have had the following infections in the past 12 months.

If, for example, you have had three colds and one otitis media, then you have had a total of four infectious events of the upper respiratory tract (thus "3 to 4 times"). If you have not had an upper respiratory tract infection, please tick "Never".

[IN] In the past 12 months, how often have you had ...

|                                                                                                                                           | Never                    | Once                     | Twice                    | 3 to 4 times             | 5 to 6 times             | More than 6 times        | Don't know               |
|-------------------------------------------------------------------------------------------------------------------------------------------|--------------------------|--------------------------|--------------------------|--------------------------|--------------------------|--------------------------|--------------------------|
| [IN1] ... an infection of the upper respiratory tract (e.g., colds or infections of nasal sinuses, tonsils, middle ear, pharynx, larynx)? | <input type="checkbox"/> | <input type="checkbox"/> | <input type="checkbox"/> | <input type="checkbox"/> | <input type="checkbox"/> | <input type="checkbox"/> | <input type="checkbox"/> |
| [IN2] ... an infection of the lower respiratory tract (e.g., bronchitis or pneumonia)?                                                    | <input type="checkbox"/> | <input type="checkbox"/> | <input type="checkbox"/> | <input type="checkbox"/> | <input type="checkbox"/> | <input type="checkbox"/> | <input type="checkbox"/> |
| [IN4] ... an infection of the urinary bladder ("cystitis")?                                                                               | <input type="checkbox"/> | <input type="checkbox"/> | <input type="checkbox"/> | <input type="checkbox"/> | <input type="checkbox"/> | <input type="checkbox"/> | <input type="checkbox"/> |

[IN1a] Have you been hospitalized for at least one of the upper respiratory tract infections (i.e., at least one night in the hospital)?

▼ IN\_IN1 >= "Once"

- Yes
- No
- Don't know

[IN2a] Have you been hospitalized for at least one of the lower respiratory tract infections (i.e., at least one night in the hospital)?

▼ IN\_IN2 >= "Once"

- Yes
- No
- Don't know

### 3: Infections (continued)

[IN4] In the past 12 months, how often have you had ...

▼ sex == "Female"

|                                                      | Never                    | Once                     | Twice                    | 3 to 4 times             | 5 to 6 times             | More than 6 times        | Chronically (permanently) | Don't know               |
|------------------------------------------------------|--------------------------|--------------------------|--------------------------|--------------------------|--------------------------|--------------------------|---------------------------|--------------------------|
| [IN5] ... an infection (inflammation) of the vagina? | <input type="checkbox"/> | <input type="checkbox"/> | <input type="checkbox"/> | <input type="checkbox"/> | <input type="checkbox"/> | <input type="checkbox"/> | <input type="checkbox"/>  | <input type="checkbox"/> |

[IN5] In the past 12 months, how often have you had ...

|                                                  | Never                    | Once                     | Twice                    | 3 to 4 times             | 5 to 6 times             | More than 6 times        | Don't know               |
|--------------------------------------------------|--------------------------|--------------------------|--------------------------|--------------------------|--------------------------|--------------------------|--------------------------|
| [IN7] ... cough that lasted longer than 4 weeks? | <input type="checkbox"/> | <input type="checkbox"/> | <input type="checkbox"/> | <input type="checkbox"/> | <input type="checkbox"/> | <input type="checkbox"/> | <input type="checkbox"/> |
| [IN8] ... fever (>38°C)?*                        | <input type="checkbox"/> | <input type="checkbox"/> | <input type="checkbox"/> | <input type="checkbox"/> | <input type="checkbox"/> | <input type="checkbox"/> | <input type="checkbox"/> |
| [IN9] ... diarrhea?*                             | <input type="checkbox"/> | <input type="checkbox"/> | <input type="checkbox"/> | <input type="checkbox"/> | <input type="checkbox"/> | <input type="checkbox"/> | <input type="checkbox"/> |
| [IN10] ... cold sores?                           | <input type="checkbox"/> | <input type="checkbox"/> | <input type="checkbox"/> | <input type="checkbox"/> | <input type="checkbox"/> | <input type="checkbox"/> | <input type="checkbox"/> |

\* If the fever lasted longer than 1 day, please count as a one-time event; e.g. fever for 7 days = "once"

\*\* Diarrhea is at least 3 times fluid / pulpy bowel movements within 24 hours.

If the diarrhea lasted longer than 1 day, please count as a one-time event; e.g. diarrhea for 4 days = "once"

[IN11] Have you ever had in your life ...

|                                                | Never                    | Once                     | Twice                    | 3 to 4 times             | 5 to 6 times             | More than 6 times        | Don't know               |
|------------------------------------------------|--------------------------|--------------------------|--------------------------|--------------------------|--------------------------|--------------------------|--------------------------|
| [IN9] ... herpes zoster, also called shingles? | <input type="checkbox"/> | <input type="checkbox"/> | <input type="checkbox"/> | <input type="checkbox"/> | <input type="checkbox"/> | <input type="checkbox"/> | <input type="checkbox"/> |

[IN11a] In which year or at which age did you have herpes zoster for the first time?

You only need to enter one number (year or age).

▼ IN11\_IN9 >= "Once"

Year: *enter your answer here*

Age: *enter your answer here*



## B: Health & sociodemographic data

### 1: General health and well-being

Stress and the mental state can affect the immune system. We would like to know something about your health and well-being.

[health] How would you describe your health condition in general?

- Excellent
- Very good
- Good
- Fair
- Poor

[fatigue] How much have you been suffering from unusual exhaustion and fatigue during the past 7 days? Please tick a number from 0 ("not at all") to 10 ("very strong").

Not at all Very strong  
 0 1 2 3 4 5 6 7 8 9 10

[WHO5] The following statements relate to your well-being in the last two weeks. For each statement, please mark the section that you think best describes how you have felt in the past two weeks.

Over the last two weeks ...

|                                                                         | All of the time          | Most of the time         | More than half of the time | Less than half of the time | Some of the time         | At no time               |
|-------------------------------------------------------------------------|--------------------------|--------------------------|----------------------------|----------------------------|--------------------------|--------------------------|
| [WHO_1] ... I have felt cheerful and in good spirits.                   | <input type="checkbox"/> | <input type="checkbox"/> | <input type="checkbox"/>   | <input type="checkbox"/>   | <input type="checkbox"/> | <input type="checkbox"/> |
| [WHO_2] ... I have felt calm and relaxed.                               | <input type="checkbox"/> | <input type="checkbox"/> | <input type="checkbox"/>   | <input type="checkbox"/>   | <input type="checkbox"/> | <input type="checkbox"/> |
| [WHO_3] ... I have felt active and vigorous.                            | <input type="checkbox"/> | <input type="checkbox"/> | <input type="checkbox"/>   | <input type="checkbox"/>   | <input type="checkbox"/> | <input type="checkbox"/> |
| [WHO_4] ... I woke up feeling fresh and rested.                         | <input type="checkbox"/> | <input type="checkbox"/> | <input type="checkbox"/>   | <input type="checkbox"/>   | <input type="checkbox"/> | <input type="checkbox"/> |
| [WHO_5] ... my daily life has been filled with things that interest me. | <input type="checkbox"/> | <input type="checkbox"/> | <input type="checkbox"/>   | <input type="checkbox"/>   | <input type="checkbox"/> | <input type="checkbox"/> |

[PSS] The following questions ask you about your feelings and thoughts during the last month. In each case, you will be asked to indicate by circling how often you felt or thought a certain way.

In the last month, how often ...

|                                                                                             | Never                    | Almost never             | Sometimes                | Fairly often             | Very often               |
|---------------------------------------------------------------------------------------------|--------------------------|--------------------------|--------------------------|--------------------------|--------------------------|
| [PSS1] ... have you felt that you were unable to control the important things in your life? | <input type="checkbox"/> | <input type="checkbox"/> | <input type="checkbox"/> | <input type="checkbox"/> | <input type="checkbox"/> |
| [PSS2] ... have you felt confident about your ability to handle your personal problems?     | <input type="checkbox"/> | <input type="checkbox"/> | <input type="checkbox"/> | <input type="checkbox"/> | <input type="checkbox"/> |
| [PSS3] ... have you felt that things were going your way?                                   | <input type="checkbox"/> | <input type="checkbox"/> | <input type="checkbox"/> | <input type="checkbox"/> | <input type="checkbox"/> |
| [PSS4] ... have you found that you could not cope with all the things that you had to do?   | <input type="checkbox"/> | <input type="checkbox"/> | <input type="checkbox"/> | <input type="checkbox"/> | <input type="checkbox"/> |

## 2: General information

The following information helps to evaluate the results of the HaBIDS surveys. We use this information to investigate whether differences between participants are caused by certain demographic factors, such as gender or age. We do not evaluate the data for your person, but for those groups to which you can, for example, be assigned according to your age group, your gender or your school leaving certificate.

[sex] What is your gender?

- Male
- Female

[geb\_dat] In which year were you born?

*enter your answer here*

[geb\_DE] Were you born in Germany?

- Yes
- No

[geb\_Land] In which country were you born?

▼ geb\_DE == "No"

*enter your answer here*

[Einreise] Since when do you live in Germany?

Please specify the year or age at the time of entry.

▼ geb\_DE == "No"

Year: *enter your answer here*

Age: *enter your answer here*

[marital] What is your marital status?

"Married", "divorced" and "widowed" also refers to a registered life partnership.

- Single
- Married
- Divorced
- Widowed

### 3: Education and profession

[SES1] What is your highest general education?

- Pupil, attend a full-time school
- Left elementary school without school leaving certificate
- Elementary school (German "Hauptschule")
- Secondary school / high school (German "Realschule")
- Polytechnic high school of the GDR with completion of the 8th or 9th class
- Polytechnic high school of the GDR with completion of the 10th class
- "Fachhochschulreife", completion of a subject-specific high school
- General or subject-specific university entrance qualification / "Abitur" (German "Gymnasium" / "EOS")
- Another school leaving certificate, namely:

[SES1a] Which school leaving certificate do you strive for?

▼ SES1 == "Pupil"

- Elementary school (German "Hauptschule")
- Secondary school / high school (German "Realschule")
- "Fachhochschulreife", completion of a subject-specific high school
- General or subject-specific university entrance qualification / "Abitur"
- Another school leaving certificate, namely:

[SES2] What is your highest level of qualification?

- Still in vocational training (vocational preparation year, trainee, intern, student)
- Pupil and attend a vocational-oriented or technical school or similar
- No vocational qualification and not in vocational training
- Completed apprenticeship
- Training at vocational school, commercial school, or middle service public administration
- Training at a GDR technical school
- Training at a technical school, vocational academy or technical academy
- Bachelor of a university (of applied sciences)
- Degree of a university of applied sciences (z. B. Diplom, Master)
- University degree (z. B. Diplom, Magister, Staatsexamen, Master)
- Doctorate
- Don't know
- Another professional qualification, namely:

[SES3] What is the average monthly net income of your household as a whole?

This household includes all persons who live and work together here.

The average monthly net income of your household is the sum of wages, salaries, income from self-employed activities (average net operations, i.e. minus operating expenses and taxes), or pension. Please also include the income from public aid, income from renting and leasing, property, housing, child allowance and other income, and then deduct taxes and social insurance contributions.

- Less than 1250 Euros
- 1250 to less than 1750 Euros
- 1750 to less than 2250 Euros
- 2250 to less than 3000 Euros
- 3000 to less than 4000 Euros
- 4000 to less than 5000 Euros
- 5000 and more
- I don't want to answer
- Don't know

## 4: Internet

[Internet] Do you have access to the Internet in your household?

- Yes
- No

[Gerät] What devices do you use to access the Internet?

(multiple choice possible)

▼ Internet == "Yes"

- Desktop-PC
- Laptop
- Tablet
- Smartphone
- None
- Others (please specify):

[Internetnutzung] How often do you personally use the Internet for private purposes?

▼ Internet == "Yes"

- Daily / almost daily
- About two or three times a week
- About once a week
- About two or three times a month
- About once a month
- Less than once a month
- I don't use the Internet at home, but there is an access

## 5: Pets

[pets] Do you have pets?

- Yes
- No

[pet\_art] What pets do you have?  
(multiple choice possible)

▼ pets == "Yes"

- Dog(s)
- Cat(s)
- Rodent(s)
- Other (please specify):

## C (mixed-mode) / D (online-only): Prevention measures against respiratory infections

The following questions are about how to protect yourself from respiratory infections.

### 1: Preventing respiratory infections

[VIa] Do you think that the following behaviors can prevent respiratory infections or minimize the risk of disease?

|                                                        | Protects very well       | Protects well            | Partly partly            | Doesn't protect well     | Doesn't protect at all   | Don't know               |
|--------------------------------------------------------|--------------------------|--------------------------|--------------------------|--------------------------|--------------------------|--------------------------|
| [VI1] Thorough hand washing with soap                  | <input type="checkbox"/> | <input type="checkbox"/> | <input type="checkbox"/> | <input type="checkbox"/> | <input type="checkbox"/> | <input type="checkbox"/> |
| [VI2] Relaxation exercises                             | <input type="checkbox"/> | <input type="checkbox"/> | <input type="checkbox"/> | <input type="checkbox"/> | <input type="checkbox"/> | <input type="checkbox"/> |
| [VI3] Regular ventilation                              | <input type="checkbox"/> | <input type="checkbox"/> | <input type="checkbox"/> | <input type="checkbox"/> | <input type="checkbox"/> | <input type="checkbox"/> |
| [VI4] Ingestion of vitamin C (as a dietary supplement) | <input type="checkbox"/> | <input type="checkbox"/> | <input type="checkbox"/> | <input type="checkbox"/> | <input type="checkbox"/> | <input type="checkbox"/> |
| [VI5] Saunas                                           | <input type="checkbox"/> | <input type="checkbox"/> | <input type="checkbox"/> | <input type="checkbox"/> | <input type="checkbox"/> | <input type="checkbox"/> |
| [VI6] Endurance sports                                 | <input type="checkbox"/> | <input type="checkbox"/> | <input type="checkbox"/> | <input type="checkbox"/> | <input type="checkbox"/> | <input type="checkbox"/> |
| [VI7] Nasal irrigation with water                      | <input type="checkbox"/> | <input type="checkbox"/> | <input type="checkbox"/> | <input type="checkbox"/> | <input type="checkbox"/> | <input type="checkbox"/> |
| [VI8] Healthy diet, lots of fruits and vegetables      | <input type="checkbox"/> | <input type="checkbox"/> | <input type="checkbox"/> | <input type="checkbox"/> | <input type="checkbox"/> | <input type="checkbox"/> |
| [VI9] Homeopathic remedies                             | <input type="checkbox"/> | <input type="checkbox"/> | <input type="checkbox"/> | <input type="checkbox"/> | <input type="checkbox"/> | <input type="checkbox"/> |

[VI9\_h] What homeopathic remedies can minimize the risk of disease?

▼ VIa\_VI9 == "Protects (very) well"

*enter your answer here*

[VIb] Do you think that the following behaviors can prevent respiratory infections or minimize the risk of disease?

|                                                                                               | Protects very well       | Protects well            | Partly partly            | Doesn't protect well     | Doesn't protect at all   | Don't know               |
|-----------------------------------------------------------------------------------------------|--------------------------|--------------------------|--------------------------|--------------------------|--------------------------|--------------------------|
| [VI10] Movement in the fresh air                                                              | <input type="checkbox"/> | <input type="checkbox"/> | <input type="checkbox"/> | <input type="checkbox"/> | <input type="checkbox"/> | <input type="checkbox"/> |
| [VI11] Regular consumption of probiotic yoghurts                                              | <input type="checkbox"/> | <input type="checkbox"/> | <input type="checkbox"/> | <input type="checkbox"/> | <input type="checkbox"/> | <input type="checkbox"/> |
| [VI12] Alternating showers or foot baths (alternately hot and cold)                           | <input type="checkbox"/> | <input type="checkbox"/> | <input type="checkbox"/> | <input type="checkbox"/> | <input type="checkbox"/> | <input type="checkbox"/> |
| [VI13] Don't overheat housing                                                                 | <input type="checkbox"/> | <input type="checkbox"/> | <input type="checkbox"/> | <input type="checkbox"/> | <input type="checkbox"/> | <input type="checkbox"/> |
| [VI14] Drink a lot (water, tea, ...)                                                          | <input type="checkbox"/> | <input type="checkbox"/> | <input type="checkbox"/> | <input type="checkbox"/> | <input type="checkbox"/> | <input type="checkbox"/> |
| [VI15] Sufficient sleep                                                                       | <input type="checkbox"/> | <input type="checkbox"/> | <input type="checkbox"/> | <input type="checkbox"/> | <input type="checkbox"/> | <input type="checkbox"/> |
| [VI16] Avoid freezing and cold                                                                | <input type="checkbox"/> | <input type="checkbox"/> | <input type="checkbox"/> | <input type="checkbox"/> | <input type="checkbox"/> | <input type="checkbox"/> |
| [VI17] Avoid contact with patients (don't shake hands, don't drink from the same glass, etc.) | <input type="checkbox"/> | <input type="checkbox"/> | <input type="checkbox"/> | <input type="checkbox"/> | <input type="checkbox"/> | <input type="checkbox"/> |

## 2: Measures

[VI\_Ua] Which of the following are you implementing?

|                                                                       | Several times a day      | Once daily               | 3 times or more per week, but not daily | 1 to 2 times a week      | Less than 1 time per week | Never                    |
|-----------------------------------------------------------------------|--------------------------|--------------------------|-----------------------------------------|--------------------------|---------------------------|--------------------------|
| [VI_U1] Thorough hand washing with soap                               | <input type="checkbox"/> | <input type="checkbox"/> | <input type="checkbox"/>                | <input type="checkbox"/> | <input type="checkbox"/>  | <input type="checkbox"/> |
| [VI_U2] Relaxation exercises                                          | <input type="checkbox"/> | <input type="checkbox"/> | <input type="checkbox"/>                | <input type="checkbox"/> | <input type="checkbox"/>  | <input type="checkbox"/> |
| [VI_U3] Regular ventilation                                           | <input type="checkbox"/> | <input type="checkbox"/> | <input type="checkbox"/>                | <input type="checkbox"/> | <input type="checkbox"/>  | <input type="checkbox"/> |
| [VI_U4] Taking vitamin C (as a dietary supplement)                    | <input type="checkbox"/> | <input type="checkbox"/> | <input type="checkbox"/>                | <input type="checkbox"/> | <input type="checkbox"/>  | <input type="checkbox"/> |
| [VI_U5] Saunas                                                        | <input type="checkbox"/> | <input type="checkbox"/> | <input type="checkbox"/>                | <input type="checkbox"/> | <input type="checkbox"/>  | <input type="checkbox"/> |
| [VI_U6] Endurance sports                                              | <input type="checkbox"/> | <input type="checkbox"/> | <input type="checkbox"/>                | <input type="checkbox"/> | <input type="checkbox"/>  | <input type="checkbox"/> |
| [VI_U7] Nasal irrigation with water                                   | <input type="checkbox"/> | <input type="checkbox"/> | <input type="checkbox"/>                | <input type="checkbox"/> | <input type="checkbox"/>  | <input type="checkbox"/> |
| [VI_U8] Healthy diet, lots of fruits and vegetables                   | <input type="checkbox"/> | <input type="checkbox"/> | <input type="checkbox"/>                | <input type="checkbox"/> | <input type="checkbox"/>  | <input type="checkbox"/> |
| [VI_U9] Homeopathic remedies                                          | <input type="checkbox"/> | <input type="checkbox"/> | <input type="checkbox"/>                | <input type="checkbox"/> | <input type="checkbox"/>  | <input type="checkbox"/> |
| [VI_U10] Movement in the fresh air                                    | <input type="checkbox"/> | <input type="checkbox"/> | <input type="checkbox"/>                | <input type="checkbox"/> | <input type="checkbox"/>  | <input type="checkbox"/> |
| [VI_U11] Regular consumption of probiotic yoghurts                    | <input type="checkbox"/> | <input type="checkbox"/> | <input type="checkbox"/>                | <input type="checkbox"/> | <input type="checkbox"/>  | <input type="checkbox"/> |
| [VI_U12] Alternating showers or foot baths (alternately hot and cold) | <input type="checkbox"/> | <input type="checkbox"/> | <input type="checkbox"/>                | <input type="checkbox"/> | <input type="checkbox"/>  | <input type="checkbox"/> |

[VI\_Uc] Which of the following are you implementing?

|                                                                                                 | Always                   | Very often               | Often                    | Sometimes                | Never                    |
|-------------------------------------------------------------------------------------------------|--------------------------|--------------------------|--------------------------|--------------------------|--------------------------|
| [VI_U13] Don't overheat housing                                                                 | <input type="checkbox"/> | <input type="checkbox"/> | <input type="checkbox"/> | <input type="checkbox"/> | <input type="checkbox"/> |
| [VI_U14] Drink a lot (water, tea, ...)                                                          | <input type="checkbox"/> | <input type="checkbox"/> | <input type="checkbox"/> | <input type="checkbox"/> | <input type="checkbox"/> |
| [VI_U15] Sufficient sleep                                                                       | <input type="checkbox"/> | <input type="checkbox"/> | <input type="checkbox"/> | <input type="checkbox"/> | <input type="checkbox"/> |
| [VI_U16] Avoid freezing and cold                                                                | <input type="checkbox"/> | <input type="checkbox"/> | <input type="checkbox"/> | <input type="checkbox"/> | <input type="checkbox"/> |
| [VI_U17] Avoid contact with patients (don't shake hands, don't drink from the same glass, etc.) | <input type="checkbox"/> | <input type="checkbox"/> | <input type="checkbox"/> | <input type="checkbox"/> | <input type="checkbox"/> |

### 3: Behavior during cold time

[VI\_winter] Do you consciously behave differently in the cold / winter season to protect yourself from a cold?

Yes

No



## 4: Other measures

[VI\_and] Do you take other measures that have not been mentioned so far to protect yourself from a disease?

Measure 1: *enter your answer here*

Measure 2: *enter your answer here*

Measure 3: *enter your answer here*

## **C (online-only): Determinants for participation in community-based cohorts on infectious diseases**

We plan to conduct a scientific study in which the transmission and risks of gastrointestinal and respiratory diseases such as colds are to be investigated using new methods. The results are supposed to lead to the development of better protective measures. Thus, you will also benefit in the future.

To prepare for this study, we would like to know the circumstances under which you would be generally willing to participate in such a study. Your responses help us to design the study in a way that best suits the needs of future participants. Your opinion is important to us. If you complete this questionnaire, it does not mean that you must participate in the planned study or be invited to do so.

The following questions deal with the conditions under which you would participate in such a study.

### **1: Report on disease signs**

[Nino1] If you should report daily on the onset of disease signs such as cough or diarrhea, would you be willing to do that for over 2 years?

- Yes, I would do it for 2 years
- Not at all
- I would do it for the following duration at maximum (please enter number of months):

[Nino2] If you should report weekly on the onset of disease signs such as cough or diarrhea, would you be willing to do that for over 2 years?

- Yes, I would do it for 2 years
- Not at all
- I would do it for the following duration at maximum (please enter number of months):

[Nino3] If you should report monthly on the onset of disease signs such as cough or diarrhea, would you be willing to do that for over 2 years?

- Yes, I would do it for 2 years
- Not at all
- I would do it for the following duration at maximum (please enter number of months):

## 2: Report on disease signs (continued)

[Nino4] How would you like to regularly report the symptoms like cough or diarrhea in the following way?

|                                                                                                                                  | Gladly                   | Partly,<br>partly        | Reluctantly              |
|----------------------------------------------------------------------------------------------------------------------------------|--------------------------|--------------------------|--------------------------|
| [1] Via a specific electronic mobile device intended only for this study and not linked to any devices or data outside the study | <input type="checkbox"/> | <input type="checkbox"/> | <input type="checkbox"/> |
| [2] Via a study smartphone including flat rate, which I also use for telephone calls and may keep after the study                | <input type="checkbox"/> | <input type="checkbox"/> | <input type="checkbox"/> |
| [3] Via an app on my own smartphone                                                                                              | <input type="checkbox"/> | <input type="checkbox"/> | <input type="checkbox"/> |
| [4] Via SMS on my own mobile phone                                                                                               | <input type="checkbox"/> | <input type="checkbox"/> | <input type="checkbox"/> |
| [5] Via a web page of my own computer / laptop / tablet                                                                          | <input type="checkbox"/> | <input type="checkbox"/> | <input type="checkbox"/> |
| [6] Via emails from my own computer / laptop / tablet / smartphone                                                               | <input type="checkbox"/> | <input type="checkbox"/> | <input type="checkbox"/> |
| [7] Via paper questionnaires, which I send by post free of charge                                                                | <input type="checkbox"/> | <input type="checkbox"/> | <input type="checkbox"/> |

### 3: Record location

[Nino5] Would you agree that such a study records your location?

- Yes
- No

[Nino5a] What kind of recording of your location would you agree with?

▼ Nino5 == "Yes"

|                                                                                                                                                                                         | Yes,<br>agreed           | Partly,<br>partly        | No, not<br>agreed        |
|-----------------------------------------------------------------------------------------------------------------------------------------------------------------------------------------|--------------------------|--------------------------|--------------------------|
| [1] If my identity is not identifiable, i.e. it remains completely anonymous                                                                                                            | <input type="checkbox"/> | <input type="checkbox"/> | <input type="checkbox"/> |
| [2] If the location data is not collected via my own mobile phone / smartphone and the identity of my location data is deleted after the link with the disease data                     | <input type="checkbox"/> | <input type="checkbox"/> | <input type="checkbox"/> |
| [3] If the location data is captured by a separate device independent of my own or a study smartphone and the identity of my location data is deleted after linking to the disease data | <input type="checkbox"/> | <input type="checkbox"/> | <input type="checkbox"/> |
| [4] If the linkage of the location data with my identity is deleted after the study has expired                                                                                         | <input type="checkbox"/> | <input type="checkbox"/> | <input type="checkbox"/> |

[Nino5a\_other] If another condition, namely the following condition is satisfied:

▼ Nino5 == "Yes "

*enter your answer here*

#### 4: Biological samples

[Nino6] Would you be willing to take a smear from the nasal cavity in a respiratory disease with a cotton pad and send it to us?

The material is provided by us. Shipping is free of charge for you.

- Yes
- No
- Yes, but only on the condition that (please specify):

[Nino7] Would you be willing to send us a stool sample in the case of diarrhea, which you can take according to a manual?

The material is provided by us. Shipping is free of charge for you.

- Yes
- No
- Yes, but only on the condition that (please specify):

## 5: Data protection

[Nino8] Data protection and privacy are very important to us. What kind of data protection measures would you want to insist in?

|                                                                                                                                                                          | Yes                      | Neutral                  | No                       |
|--------------------------------------------------------------------------------------------------------------------------------------------------------------------------|--------------------------|--------------------------|--------------------------|
| [1] The entire data acquisition must have nothing to do with my mobile phone.                                                                                            | <input type="checkbox"/> | <input type="checkbox"/> | <input type="checkbox"/> |
| [2] Symptoms such as cough or diarrhea can be transmitted via my mobile phone, but not my location.                                                                      | <input type="checkbox"/> | <input type="checkbox"/> | <input type="checkbox"/> |
| [3] I would like to be asked regularly to confirm whether I would like to continue the study.                                                                            | <input type="checkbox"/> | <input type="checkbox"/> | <input type="checkbox"/> |
| [4] In order not to have to reveal my identity (e.g. address), I am willing to provide material for stool samples anonymously at a pick-up point near me.                | <input type="checkbox"/> | <input type="checkbox"/> | <input type="checkbox"/> |
| [5] I want to disable the location function at any time.                                                                                                                 | <input type="checkbox"/> | <input type="checkbox"/> | <input type="checkbox"/> |
| [6] The data from the study should not be used commercially.                                                                                                             | <input type="checkbox"/> | <input type="checkbox"/> | <input type="checkbox"/> |
| [7] I would participate in the study, independently of the specific data protection procedure, as long as this was supported by the responsible data protection officer. | <input type="checkbox"/> | <input type="checkbox"/> | <input type="checkbox"/> |
| [8] I would not want to participate in any of the above circumstances.                                                                                                   | <input type="checkbox"/> | <input type="checkbox"/> | <input type="checkbox"/> |

[Nino8\_other] I would insist in another data protection measure not mentioned here, namely:  
*enter your answer here*

## 6: Motivation

If the study were to be introduced in your neighborhood, how important would you consider the following aspects to motivate people to participate in such a scientific study?

Please estimate whether the measures below are more beneficial, unimportant, or more hindering to motivate people to participate.

[Nino9a] Support of the study by certain persons / institutions:

|                                               | More beneficial          | Unimportant              | More hindering           |
|-----------------------------------------------|--------------------------|--------------------------|--------------------------|
| [1] Politicians and celebrities of the region | <input type="checkbox"/> | <input type="checkbox"/> | <input type="checkbox"/> |
| [2] Physicians of the region                  | <input type="checkbox"/> | <input type="checkbox"/> | <input type="checkbox"/> |
| [3] Churches and religious communities        | <input type="checkbox"/> | <input type="checkbox"/> | <input type="checkbox"/> |
| [4] Mayor / town council                      | <input type="checkbox"/> | <input type="checkbox"/> | <input type="checkbox"/> |
| [5] Local societies and associations          | <input type="checkbox"/> | <input type="checkbox"/> | <input type="checkbox"/> |
| [6] Your employer                             | <input type="checkbox"/> | <input type="checkbox"/> | <input type="checkbox"/> |

[Nino9b] Offers for study participants:

|                                                                                                                                                                                                                     | More beneficial          | Unimportant              | More hindering           |
|---------------------------------------------------------------------------------------------------------------------------------------------------------------------------------------------------------------------|--------------------------|--------------------------|--------------------------|
| [1] Regular feedback of own data compared with the average of the data of all other participants in the study. You then see whether you are, for example, more frequently ill than the average of the participants. | <input type="checkbox"/> | <input type="checkbox"/> | <input type="checkbox"/> |
| [2] Regular feedback of the average data, without communication of own data                                                                                                                                         | <input type="checkbox"/> | <input type="checkbox"/> | <input type="checkbox"/> |
| [3] Providing individual health advice by e-mail e.g. to recommended vaccinations                                                                                                                                   | <input type="checkbox"/> | <input type="checkbox"/> | <input type="checkbox"/> |
| [4] The participants receive financial compensation.                                                                                                                                                                | <input type="checkbox"/> | <input type="checkbox"/> | <input type="checkbox"/> |
| [5] The study smartphone may be used for private purposes and kept after to the study.                                                                                                                              | <input type="checkbox"/> | <input type="checkbox"/> | <input type="checkbox"/> |
| [6] There are regular social events, where the participants can meet and inform about the study.                                                                                                                    | <input type="checkbox"/> | <input type="checkbox"/> | <input type="checkbox"/> |
| [7] The participants themselves encourage family members / friends / work colleagues to take part in the study.                                                                                                     | <input type="checkbox"/> | <input type="checkbox"/> | <input type="checkbox"/> |
| [8] The knowledge that family members / friends / colleagues already participate in the study.                                                                                                                      | <input type="checkbox"/> | <input type="checkbox"/> | <input type="checkbox"/> |
| [9] There is the possibility of submitting research questions themselves.                                                                                                                                           | <input type="checkbox"/> | <input type="checkbox"/> | <input type="checkbox"/> |
| [10] If the results of the study can contribute directly to reducing the incidence of infections in their own environment.                                                                                          | <input type="checkbox"/> | <input type="checkbox"/> | <input type="checkbox"/> |
| [11] If the participants are recognizable as researchers of the project (for example, listed on a website on request, or, if desired, mentioned in scientific publications).                                        | <input type="checkbox"/> | <input type="checkbox"/> | <input type="checkbox"/> |

## 7: Percentage of participation

[Nino10] We have mentioned above various ways to conduct the study. Please estimate, which percentage of the population in your community would participate in such a study, if...

[1] ... the effort would be very limited (short duration (6 months), simple and rare inquiries (monthly), no sampling in case of respiratory disease or diarrhea):

[2] ... the effort would be relatively high (long duration (2 to 3 years), frequent inquiries (daily) with more than 3 samples per half-year):

[3] ... maximum anonymity would be ensured, i.e. no location recording:

[4] ... the research institute could assign my identity to the data but would not pass it on to other persons or institutions:

I estimate that ... percent of the population would participate

Please specify an estimate between 0% and 100%.



## 8: Acceptance of blood sampling

[Nino11] Some research questions can only be carried out by the examination of blood. Under which circumstances would you agree?

|                                                                                                        | Yes,<br>agreed           | Partly,<br>partly        | No, not<br>agreed        |
|--------------------------------------------------------------------------------------------------------|--------------------------|--------------------------|--------------------------|
| [1] Only once at the beginning and at the end of the study                                             | <input type="checkbox"/> | <input type="checkbox"/> | <input type="checkbox"/> |
| [2] Only in the case of blood collection by a doctor of my trust                                       | <input type="checkbox"/> | <input type="checkbox"/> | <input type="checkbox"/> |
| [3] In the case of blood sampling in a study center by medical staff                                   | <input type="checkbox"/> | <input type="checkbox"/> | <input type="checkbox"/> |
| [4] By myself, by a special device, apply a bloodstripe from my fingertip to special paper and send it | <input type="checkbox"/> | <input type="checkbox"/> | <input type="checkbox"/> |
| [5] In the case of blood sampling by medical staff who come to my home                                 | <input type="checkbox"/> | <input type="checkbox"/> | <input type="checkbox"/> |

## 9: Study center

[Nino12] Some studies require detailed medical examinations and surveys in a study center. If the study center was nearby, would you be willing to participate in an investigation program lasting 6 hours?

- Yes
- Not at all
- I would do it for the following duration at maximum (please enter duration in hours):

[Nino12a] What day of the week and what time would you prefer to visit the study center? You can specify several days. Please enter "0" if the weekday is not possible for you.

▼ Nino12 != "Not at all"

- [1] Mondays            between ... o' clock    and ... o' clock
- [2] Tuesdays        between ... o' clock    and ... o' clock
- [3] Wednesdays     between ... o' clock    and ... o' clock
- [4] Thursdays     between ... o' clock    and ... o' clock
- [5] Fridays            between ... o' clock    and ... o' clock
- [6] Saturdays        between ... o' clock    and ... o' clock

## 10: Household

[hh] How many people, including yourself, are living in your household?

A household includes all persons who live and work together here. Please also think of all children living in the household.

If you live in several households (e.g., weekend commuters), please refer to the household where you spend most of your time.

I live alone in the household

Number of people in my household (me included):

[hhkinder] Do minor children live in your household?

▼ hh != "I live alone in the household"

Yes

No

[hhage\_pt] How old are the members of your household (including yourself)? Please start with the youngest member. For children under one year, please enter "0".

▼ hh != "I live alone in the household"

[1] Age (in years)

[2] Age (in years)

[3] Age (in years)

[4] Age (in years)

[5] Age (in years)

[6] Age (in years)

[7] Age (in years)

[8] Age (in years)

[9] Age (in years)

[10] Age (in years)

## 11: Participation of children

[Nino13a] Would you generally agree if the children in your household would participate in the study?

▼ hhkinder == "Yes"

Yes

No

Don't know

[Nino13b] Would you agree in particular if your child / children...

▼ Nino13a == "Yes" | Nino13a == "Don't know"

|                                                                                                                | Yes                      | No                       |
|----------------------------------------------------------------------------------------------------------------|--------------------------|--------------------------|
| [1] ... would participate in the survey or you would report on the symptoms of your child / children?          | <input type="checkbox"/> | <input type="checkbox"/> |
| [2] ... would send us a stool sample in case of diarrhea?                                                      | <input type="checkbox"/> | <input type="checkbox"/> |
| [3] ... would take a smear from the nasal cavity in a respiratory disease with a cotton pad and send it to us? | <input type="checkbox"/> | <input type="checkbox"/> |
| [4] ... would transfer their location to us?                                                                   | <input type="checkbox"/> | <input type="checkbox"/> |

## 12: Remarks

[Nino14a] What research questions do you find particularly interesting in the context of transmission paths?  
*enter your answer here*

[Nino14b] What characteristics of such a study could be especially conducive to participation?  
*enter your answer here*

[Nino14c] What characteristics of such a study would deter people from participating?  
*enter your answer here*

[Nino14d] Would you like to tell us something else?  
*enter your answer here*

## D (mixed-mode): Social contact patterns (summer)

This questionnaire is about how many people you have contact with in one day.

Contact means that you have spoken with one person more than 10 words and were not more than 2 meters away from that person. Shaking hands or kissing is also counted as contact (i.e. whenever you touch a person's skin).

You can start the survey only once. You can now enter the contacts for yesterday, or wait until tomorrow and fill in the contacts retrospectively for today.

Before you complete the questionnaire, please refer to the pdf guide to see how you can enter the contacts. In order to make sure you have not forgotten a contact, we suggest that you try to go through the whole day in your mind. Your appointment book may be useful. Since it can be difficult not to mess with the contacts, we suggest that you first write down all contact persons on paper and then pass the information to the online questionnaire. A table for your notes is included in the pdf guide. You can also take notes during the day and enter your contacts in the evening.

### 1: Household

[hh\_single] Do you live alone in your household?

If you live in several households (e.g. weekend commuters), please refer to the household where you spend most of your time.

- Yes
- No

[hh] How many people, including yourself, are living in your household?

A household includes all persons who live and work together here. Please also think of all children living in the household.

▼ hh\_single == "No"

*enter your answer here*

[hhage\_pt1] How old are the members of your household (including yourself)?

Please start with the youngest members. For children under one year, please enter "0".

▼ hh\_single == "No"

- [1] Age (in years)
- [2] Age (in years)
- [3] Age (in years)
- [4] Age (in years)
- [5] Age (in years)
- [6] Age (in years)
- [7] Age (in years)
- [8] Age (in years)
- [9] Age (in years)
- [10] Age (in years)

## 2: Regular contacts in work / education / school

"Contact" means, for example:

You spoke to a person and the distance was no more than two meters. Please don't enter any contacts that have been made by telephone only.

or

You have touched the skin of another person (for example, shaking hands, kissing, contact sports ...).

[Kontakt] Do you regularly have a lot of contact with other people, in other words, more than 10 contacts with customers, pupils, students, colleagues, etc.?

Yes

No

[Kontakt\_zu] I regularly have lots of contact with...

(multiple choice possible)

▼ Kontakt == "Yes"

Customers

Pupils

Students

Patients

Colleagues

Other (please specify):

[Kontakt\_anz] With how many people (customers, students, patients, etc.) per day do you regularly have lots of contact?

Please include the persons who you only meet during work / training or at school. Please don't include these persons in the following questions. There, please enter only the persons you have met (also) private.

▼ Kontakt == "Yes"

*enter your answer here*

### **3: Interpersonal contacts in leisure time**

We would like to ask you to enter all the contacts which have taken place within one day in the following questionnaire. Look for a day, e.g. yesterday. Please refer to a total of 24 hours.

Start with the first person you were in contact with on the day you completed the questionnaire. If you had contact with other persons on the day, answer the question "Did you have contact with further persons on this day?" with "Yes" and click "Next" to add another person. If you have not contacted another person, please answer "No" and click "Next". You will be directed to the end of the survey.

[Datum] Please enter the date of the day for which you complete the questionnaire for your personal contacts.  
*enter your answer here*



#### 4: 1st contact person

"Contact" means, for example:

You spoke to a person and the distance was no more than two meters. Please don't enter any contacts that have been made by telephone only.

or

You have touched the skin of another person (for example, handing, kissing, contact sports ...).

[Alter1] Age

If you don't know the exact age, give a very narrow estimation of the age range (e.g. 40-45).

*enter your answer here*

[Sex\_1] Sex

Female

Male

[Ort1] Place of contact

(multiple choice possible)

At home

At work

Kindergarten / school / university

Means of transport (train, car, bus...)

Leisure time

Other (please specify):

[Haut\_1] Have you touched the skin of this contact person?

Yes

No

[Kontakt\_1] How often do you usually have contact with this person?

(Almost) every day

A few times a week

A few times a month

A few times a year or less often

The first time

[Zeit\_1] Total time spent with the person

Less than 5 minutes

5 to 15 minutes

15 minutes to 1 hour

1 to 4 hours

4 hours or more

[weiterePerson1] Did you have contact with further persons on this day?

Yes

No

#### 5: 2nd contact person

...

[Participants could fill in up to 72 contacts]

#### 75: 72nd contact person

## 76: Thank you for your participation

Thank you for completing the questionnaire. We now have a few questions to you about the survey itself and how you have coped with completing it. The answers help us to improve the survey and make it more comprehensible.

[verstaendlich] How do you assess the following statements?

|                                                                                                    | Strongly agree           | Agree                    | Disagree                 | Strongly disagree        |
|----------------------------------------------------------------------------------------------------|--------------------------|--------------------------|--------------------------|--------------------------|
| [1] Completing the survey was easy.                                                                | <input type="checkbox"/> | <input type="checkbox"/> | <input type="checkbox"/> | <input type="checkbox"/> |
| [2] The pdf guide was helpful.                                                                     | <input type="checkbox"/> | <input type="checkbox"/> | <input type="checkbox"/> | <input type="checkbox"/> |
| [3] Completing the survey went quickly.                                                            | <input type="checkbox"/> | <input type="checkbox"/> | <input type="checkbox"/> | <input type="checkbox"/> |
| [4] It was difficult to keep track of which contact has already been registered during completing. | <input type="checkbox"/> | <input type="checkbox"/> | <input type="checkbox"/> | <input type="checkbox"/> |

[Papier] Have you used the note tables from the pdf manual to keep track of your entries?

Yes

No

[Anmerkung] Do you have any further comments or suggestions for improvement?

*enter your answer here*

If you have entered all the contacts you had on your chosen day, you can now end the survey by clicking on "Submit".

## E: Adult vaccinations

In Germany, an independent body of experts recommends which vaccinations are useful in which age. Most vaccinations are carried out in the early childhood in order to protect children from infections as early as possible. In this questionnaire, however, we are specifically interested in vaccinations in adulthood.

### 1: Vaccinations

[IM] Have you been vaccinated against the following infections in the last 10 years?

|                                          | Yes                      | No                       | Don't know               |
|------------------------------------------|--------------------------|--------------------------|--------------------------|
| [di] Diphtheria                          | <input type="checkbox"/> | <input type="checkbox"/> | <input type="checkbox"/> |
| [te] Tetanus (wound stiff spasm)         | <input type="checkbox"/> | <input type="checkbox"/> | <input type="checkbox"/> |
| [pe] Pertussis (whooping cough)          | <input type="checkbox"/> | <input type="checkbox"/> | <input type="checkbox"/> |
| [pn] Pneumococcal infection              | <input type="checkbox"/> | <input type="checkbox"/> | <input type="checkbox"/> |
| [po] Poliomyelitis (infantile paralysis) | <input type="checkbox"/> | <input type="checkbox"/> | <input type="checkbox"/> |
| [he] Hepatitis B                         | <input type="checkbox"/> | <input type="checkbox"/> | <input type="checkbox"/> |

[IM1] Are you planning to get vaccinated against one or more of the above-mentioned infections?

|                                          | Yes                      | No                       | Don't know               |
|------------------------------------------|--------------------------|--------------------------|--------------------------|
| [di] Diphtheria                          | <input type="checkbox"/> | <input type="checkbox"/> | <input type="checkbox"/> |
| [te] Tetanus (wound stiff spasm)         | <input type="checkbox"/> | <input type="checkbox"/> | <input type="checkbox"/> |
| [pe] Pertussis (whooping cough)          | <input type="checkbox"/> | <input type="checkbox"/> | <input type="checkbox"/> |
| [pn] Pneumococcal infection              | <input type="checkbox"/> | <input type="checkbox"/> | <input type="checkbox"/> |
| [po] Poliomyelitis (infantile paralysis) | <input type="checkbox"/> | <input type="checkbox"/> | <input type="checkbox"/> |
| [he] Hepatitis B                         | <input type="checkbox"/> | <input type="checkbox"/> | <input type="checkbox"/> |

## 2: Influenza

[IM2gr] How many times have you been vaccinated against influenza in the last 10 years?

- Not at all
- Once only
- 2 to 3 times
- 4 to 7 times
- Almost every year (8 to 9 times)
- Every year (10 times)
- Don't know

[IM2gr\_v] Are you planning to get vaccinated against influenza in the 2014/2015 season?

- Yes
- No
- Don't know

[IM2gr\_a] Does your employer provide the influenza vaccination for employees?

- Yes
- No
- I don't have an employer
- Don't know

[IM2h1n1] Have you been vaccinated against "swine flu" in autumn / winter 2009/2010?

- Yes
- No
- Don't know

### 3: Vaccination boosts

[IM3ber] Have you talked with your general practitioner in the past 12 months about vaccination boosts?

- No, because I was not at my general practitioner in the last 12 months.
- No, we have not talked about it.
- Yes, I asked my general practitioner.
- Yes, my general practitioner has asked me about it.
- I don't have a general practitioner.
- Don't know

[IM3ber2] Have you, within the last 12 months, been advised by your specialist physician about vaccinations?  
(multiple choice possible)

- No
- Yes, from medical doctor
- Yes, from pharmacist
- Yes, from a doctor's assistant
- Yes, from a midwife
- Yes, from the medical advice center
- Yes, from the Health Office
- Yes, from my health insurance
- Don't know

## 4: Vaccination card

[IM4pass] Do you have a vaccination card?

- Yes
- No
- Don't know

[IM4pass\_wo] Do you know where your vaccination card is currently?

▼ IM4pass == "Yes"

- Yes, exactly
- Yes, approximately
- No

## 5: Official recommendations

[IM5know] Do you know which adult vaccinations are currently recommended?

|                                                                                                                                                                       | True                     | Untrue                   | Don't know               |
|-----------------------------------------------------------------------------------------------------------------------------------------------------------------------|--------------------------|--------------------------|--------------------------|
| [1] All adults over 18 years should be vaccinated every 10 years against diphtheria and tetanus.                                                                      | <input type="checkbox"/> | <input type="checkbox"/> | <input type="checkbox"/> |
| [2] All adults over 18 years should be vaccinated every 10 years against pertussis.                                                                                   | <input type="checkbox"/> | <input type="checkbox"/> | <input type="checkbox"/> |
| [3] All adults, who are not protected against measles, should be vaccinated.                                                                                          | <input type="checkbox"/> | <input type="checkbox"/> | <input type="checkbox"/> |
| [4] All adults over 18 years should be vaccinated against influenza.                                                                                                  | <input type="checkbox"/> | <input type="checkbox"/> | <input type="checkbox"/> |
| [5] All adults over 60 years should be vaccinated once against pneumococcal infection. (Pneumococci are bacteria that can cause severe infections such as pneumonia.) | <input type="checkbox"/> | <input type="checkbox"/> | <input type="checkbox"/> |
| [6] All adults over 18 years, who were not vaccinated against poliomyelitis, should be vaccinated.                                                                    | <input type="checkbox"/> | <input type="checkbox"/> | <input type="checkbox"/> |
| [7] All dog owners should be vaccinated against rabies.                                                                                                               | <input type="checkbox"/> | <input type="checkbox"/> | <input type="checkbox"/> |

## 6: Vaccinations for adults

[IM6att] We would like to ask you some questions about your opinion about vaccinations.

|                                                                                                      | Strongly agree           | Agree                    | Disagree                 | Strongly disagree        | Don't know               |
|------------------------------------------------------------------------------------------------------|--------------------------|--------------------------|--------------------------|--------------------------|--------------------------|
| [1] Vaccinations are effective means to protect against severe infectious diseases.                  | <input type="checkbox"/> | <input type="checkbox"/> | <input type="checkbox"/> | <input type="checkbox"/> | <input type="checkbox"/> |
| [2] Vaccinations are getting better and safer.                                                       | <input type="checkbox"/> | <input type="checkbox"/> | <input type="checkbox"/> | <input type="checkbox"/> | <input type="checkbox"/> |
| [3] I am concerned that my immune system could become weakened as a result of too many vaccinations. | <input type="checkbox"/> | <input type="checkbox"/> | <input type="checkbox"/> | <input type="checkbox"/> | <input type="checkbox"/> |
| [4] I will not get vaccinations because of fear of injections.                                       | <input type="checkbox"/> | <input type="checkbox"/> | <input type="checkbox"/> | <input type="checkbox"/> | <input type="checkbox"/> |
| [5] I will not get vaccinations because of fear of side effects.                                     | <input type="checkbox"/> | <input type="checkbox"/> | <input type="checkbox"/> | <input type="checkbox"/> | <input type="checkbox"/> |
| [6] I will not get vaccinations because of fear of long-term consequences.                           | <input type="checkbox"/> | <input type="checkbox"/> | <input type="checkbox"/> | <input type="checkbox"/> | <input type="checkbox"/> |
| [7] I am for mandatory vaccinations for all adults.                                                  | <input type="checkbox"/> | <input type="checkbox"/> | <input type="checkbox"/> | <input type="checkbox"/> | <input type="checkbox"/> |
| [8] I am for mandatory vaccinations for some individuals such as health care workers.                | <input type="checkbox"/> | <input type="checkbox"/> | <input type="checkbox"/> | <input type="checkbox"/> | <input type="checkbox"/> |



## 7: Attitude

[IM7att\_gen] What is your general attitude towards vaccinations?

- Supportive
- Slightly supportive
- Slightly negative
- Negative
- Don't know

[IM7att\_te] What is your attitude towards vaccination against tetanus?

- Supportive
- Slightly supportive
- Slightly negative
- Negative
- Don't know

[IM7att\_gr] What is your attitude towards vaccination against influenza?

- Supportive
- Slightly supportive
- Slightly negative
- Negative
- Don't know

## 8: HPV

[IM8hpv\_know] Have you ever heard of human papillomavirus (HPV) vaccination?

- Yes
- No
- Don't know

[IM8hpv] Are you vaccinated against HPV?

▼ IM8hpv\_know != "No"

- Yes
- No
- Don't know

[IM8hpv\_v] Are you planning to get vaccinated against HPV?

▼ IM8hpv\_know != "No"

- Yes
- No
- Don't know

## 9: HPV children

[IM9hpv] Do you have children between the ages of 12 and 17?

(multiple choice possible)

▼ IM8hpv\_know != "No"

- Yes, a daughter / several daughters
- Yes, a son / several sons
- No

[IM9hpv\_to\_im] Is your daughter / at least one of your daughters vaccinated against HPV?

▼ IM9hpv\_IM9hpv\_to == "Yes"

- Yes
- No
- Don't know

[IM9hpv\_to\_v] If your daughter is / daughters are not vaccinated against HPV: Would you recommend her / them to vaccinate against HPV?

▼ IM9hpv\_IM9hpv\_to == "Yes"

- Yes
- No
- Don't know

[IM9hpv\_so\_im] Is your son / at least one of your sons vaccinated against HPV?

▼ IM9hpv\_IM9hpv\_so == "Yes"

- Yes
- No
- Don't know

[IM9hpv\_so\_v] If your son is / sons are not vaccinated against HPV: Would you recommend him / them to vaccinate against HPV?

▼ IM9hpv\_IM9hpv\_so == "Yes"

- Yes
- No
- Don't know

## F: Ebola risk perception

In March 2014, the first cases of Ebola virus disease were notified in Guinea (West Africa). In the following months, the disease spread to Sierra Leone, Liberia, Nigeria, and Senegal. The WHO declared this outbreak as a Public Health Emergency of International Concern.

We are interested in your thoughts about this outbreak and if/how Ebola affects your daily life in Germany.

### 1: Ebola virus disease

[angst1] Are you worried about Ebola?

- Yes
- No

[angst2] How much are you worried about Ebola?

Please mark a number from 1="not much" to 5="very much"

▼ angst1 == "Yes"

- | Not much                 |                          | Very much                |                          |                          |
|--------------------------|--------------------------|--------------------------|--------------------------|--------------------------|
| 1                        | 2                        | 3                        | 4                        | 5                        |
| <input type="checkbox"/> | <input type="checkbox"/> | <input type="checkbox"/> | <input type="checkbox"/> | <input type="checkbox"/> |

[wissen1] How do you rate your personal knowledge about Ebola virus disease?

- Very poor
- Poor
- Moderate
- Good
- Very good

[wissen2] How do you rate the information that you get from the media about the situation in African countries affected by Ebola?

- Very poor
- Poor
- Moderate
- Good
- Very good

## 2: Probability of acquiring Ebola

[knowledge] How can Ebola be transmitted?

|                                                                                                                               | Yes                      | No                       | Don't know               |
|-------------------------------------------------------------------------------------------------------------------------------|--------------------------|--------------------------|--------------------------|
| By direct contact with bodily fluids of infected persons, either dead or living                                               | <input type="checkbox"/> | <input type="checkbox"/> | <input type="checkbox"/> |
| By direct contact with infected, but asymptomatic persons                                                                     | <input type="checkbox"/> | <input type="checkbox"/> | <input type="checkbox"/> |
| Through air, if infected people cough or sneeze                                                                               | <input type="checkbox"/> | <input type="checkbox"/> | <input type="checkbox"/> |
| Through material which has been heavily contaminated with bodily fluids of dead or living infected persons                    | <input type="checkbox"/> | <input type="checkbox"/> | <input type="checkbox"/> |
| Through drinking water                                                                                                        | <input type="checkbox"/> | <input type="checkbox"/> | <input type="checkbox"/> |
| Through food produced in Germany                                                                                              | <input type="checkbox"/> | <input type="checkbox"/> | <input type="checkbox"/> |
| By casual contact with someone already sick, such as sitting next to the person (without any direct contact of bodily fluids) | <input type="checkbox"/> | <input type="checkbox"/> | <input type="checkbox"/> |
| By wild animals in Africa (monkeys, bats)                                                                                     | <input type="checkbox"/> | <input type="checkbox"/> | <input type="checkbox"/> |
| By wild animals in Germany (rats, foxes)                                                                                      | <input type="checkbox"/> | <input type="checkbox"/> | <input type="checkbox"/> |
| By insects in Africa (mosquitoes, tsetse flies)                                                                               | <input type="checkbox"/> | <input type="checkbox"/> | <input type="checkbox"/> |
| By insects in Germany (midges)                                                                                                | <input type="checkbox"/> | <input type="checkbox"/> | <input type="checkbox"/> |

### 3: Probability of acquiring Ebola (continued)

[risk] If you think of the recent worldwide situation about Ebola: Do you think that you have a personal risk of acquiring Ebola...

|                                                                | Highly likely            | Quite likely             | Quite unlikely           | Highly unlikely          | Does not apply           |
|----------------------------------------------------------------|--------------------------|--------------------------|--------------------------|--------------------------|--------------------------|
| ... at work?                                                   | <input type="checkbox"/> | <input type="checkbox"/> | <input type="checkbox"/> | <input type="checkbox"/> | <input type="checkbox"/> |
| ... in public transport?                                       | <input type="checkbox"/> | <input type="checkbox"/> | <input type="checkbox"/> | <input type="checkbox"/> | <input type="checkbox"/> |
| ... in public places (school, childcare ...) or public events? | <input type="checkbox"/> | <input type="checkbox"/> | <input type="checkbox"/> | <input type="checkbox"/> | <input type="checkbox"/> |
| ... at an airport in Germany?                                  | <input type="checkbox"/> | <input type="checkbox"/> | <input type="checkbox"/> | <input type="checkbox"/> | <input type="checkbox"/> |
| ... as a patient in a German hospital?                         | <input type="checkbox"/> | <input type="checkbox"/> | <input type="checkbox"/> | <input type="checkbox"/> | <input type="checkbox"/> |
| ... at a doctor's office in Germany?                           | <input type="checkbox"/> | <input type="checkbox"/> | <input type="checkbox"/> | <input type="checkbox"/> | <input type="checkbox"/> |
| ... during a travel to affected countries?                     | <input type="checkbox"/> | <input type="checkbox"/> | <input type="checkbox"/> | <input type="checkbox"/> | <input type="checkbox"/> |
| ... by food imported from Western African countries?           | <input type="checkbox"/> | <input type="checkbox"/> | <input type="checkbox"/> | <input type="checkbox"/> | <input type="checkbox"/> |
| ... by other products originating in West Africa?              | <input type="checkbox"/> | <input type="checkbox"/> | <input type="checkbox"/> | <input type="checkbox"/> | <input type="checkbox"/> |

#### 4: Probability of acquiring Ebola (continued)

[pandemie] Are you worried that...

|                                                                                                                                             | Highly likely            | Quite likely             | Quite unlikely           | Highly unlikely          |
|---------------------------------------------------------------------------------------------------------------------------------------------|--------------------------|--------------------------|--------------------------|--------------------------|
| ... in the next three months people might arrive in Germany who are identified as infected persons after their entry?                       | <input type="checkbox"/> | <input type="checkbox"/> | <input type="checkbox"/> | <input type="checkbox"/> |
| ... individual persons might be infected with the Ebola virus in Germany during the next six months?                                        | <input type="checkbox"/> | <input type="checkbox"/> | <input type="checkbox"/> | <input type="checkbox"/> |
| ... in the next six months Ebola could spread in the general population of Germany similar to how it is spreading currently in West Africa? | <input type="checkbox"/> | <input type="checkbox"/> | <input type="checkbox"/> | <input type="checkbox"/> |

## 5: Personal behavior and prevention measures

[travel1] Imagine that you have booked a flight for the coming week to travel to any of the affected countries in West Africa. What would you do?

- Take the flight.
- Cancel the flight, but only if I am paid back my money.
- Cancel the flight even if 100% of the travel costs would be lost.
- Cancel the flight, but only to a maximum loss of ...% of the travel costs.

[travel2] Imagine that you have booked a flight for the coming week to a non-affected country in Africa. What would you do?

- Take the flight.
- Cancel the flight, but only if I am paid back my money.
- Cancel the flight even if 100% of the travel costs would be lost.
- Cancel the flight, but only to a maximum loss of ...% of the travel costs.



## 6: Personal behavior and prevention measures (continued)

[action\_change] Did you change your behavior because of the Ebola outbreak in West Africa?

|                                                          | Yes                      | No                       | Does not apply           |
|----------------------------------------------------------|--------------------------|--------------------------|--------------------------|
| I engaged in precautionary purchases.                    | <input type="checkbox"/> | <input type="checkbox"/> | <input type="checkbox"/> |
| I avoid contact to African people from acquaintanceship. | <input type="checkbox"/> | <input type="checkbox"/> | <input type="checkbox"/> |
| I avoid contact to African people in public places.      | <input type="checkbox"/> | <input type="checkbox"/> | <input type="checkbox"/> |
| I avoid going to public events (football, theater ...).  | <input type="checkbox"/> | <input type="checkbox"/> | <input type="checkbox"/> |
| I engaged in precautionary purchases.                    | <input type="checkbox"/> | <input type="checkbox"/> | <input type="checkbox"/> |

## 7: Personal behavior and prevention measures (continued)

[action\_hospital] Would you change your behavior if an Ebola patient was evacuated from Africa and brought to Germany for treatment in a near-by hospital?

|                                                                      | Yes                      | Rather yes               | Rather no                | No                       |
|----------------------------------------------------------------------|--------------------------|--------------------------|--------------------------|--------------------------|
| I would avoid public events and crowded places.                      | <input type="checkbox"/> | <input type="checkbox"/> | <input type="checkbox"/> | <input type="checkbox"/> |
| I would avoid using public transport.                                | <input type="checkbox"/> | <input type="checkbox"/> | <input type="checkbox"/> | <input type="checkbox"/> |
| I would avoid physical contact with other people.                    | <input type="checkbox"/> | <input type="checkbox"/> | <input type="checkbox"/> | <input type="checkbox"/> |
| I would increase my hygiene behavior (e.g. wash my hands more often) | <input type="checkbox"/> | <input type="checkbox"/> | <input type="checkbox"/> | <input type="checkbox"/> |
| I would wear a face mask outside of my home.                         | <input type="checkbox"/> | <input type="checkbox"/> | <input type="checkbox"/> | <input type="checkbox"/> |
| I would not want to be admitted to the same hospital.                | <input type="checkbox"/> | <input type="checkbox"/> | <input type="checkbox"/> | <input type="checkbox"/> |
| I would not visit friends admitted to the same hospital.             | <input type="checkbox"/> | <input type="checkbox"/> | <input type="checkbox"/> | <input type="checkbox"/> |

## 8: Personal behavior and prevention measures (continued)

[measure] Should the following measures be introduced to prevent the spread of Ebola to Europe?

|                                                                                                                                                                     | Not on any account       | Not encouraged           | Encouraged               | Yes, absolutely          |
|---------------------------------------------------------------------------------------------------------------------------------------------------------------------|--------------------------|--------------------------|--------------------------|--------------------------|
| Provide information on Ebola to all travelers coming from affected areas and provide advice in case one develops signs and symptoms                                 | <input type="checkbox"/> | <input type="checkbox"/> | <input type="checkbox"/> | <input type="checkbox"/> |
| Get personal information of all travelers coming from affected areas and control their health for three weeks long upon arrival                                     | <input type="checkbox"/> | <input type="checkbox"/> | <input type="checkbox"/> | <input type="checkbox"/> |
| Forbid return transport for Germans who get infected during aid missions in West Africa                                                                             | <input type="checkbox"/> | <input type="checkbox"/> | <input type="checkbox"/> | <input type="checkbox"/> |
| Forbid bringing Ebola patients for treatment to Germany                                                                                                             | <input type="checkbox"/> | <input type="checkbox"/> | <input type="checkbox"/> | <input type="checkbox"/> |
| Measure temperature for all travelers coming from affected countries upon arrival at Europe with subsequent quarantine for those with high temperature              | <input type="checkbox"/> | <input type="checkbox"/> | <input type="checkbox"/> | <input type="checkbox"/> |
| Measure temperature for all travelers coming from affected countries when they are about to leave Africa with subsequent quarantine for those with high temperature | <input type="checkbox"/> | <input type="checkbox"/> | <input type="checkbox"/> | <input type="checkbox"/> |
| Three weeks of mandatory quarantine for all volunteers returning from aid missions in West Africa                                                                   | <input type="checkbox"/> | <input type="checkbox"/> | <input type="checkbox"/> | <input type="checkbox"/> |
| Entry restrictions for people from affected countries                                                                                                               | <input type="checkbox"/> | <input type="checkbox"/> | <input type="checkbox"/> | <input type="checkbox"/> |
| Forbid travelling from Germany to affected countries in Africa                                                                                                      | <input type="checkbox"/> | <input type="checkbox"/> | <input type="checkbox"/> | <input type="checkbox"/> |
| Compulsory vaccination against Ebola for all inhabitants of affected countries as soon as a vaccine is available                                                    | <input type="checkbox"/> | <input type="checkbox"/> | <input type="checkbox"/> | <input type="checkbox"/> |

## 9: Personal commitment

[help1] Would you volunteer to fight Ebola in West Africa if your experience and knowledge were needed and if your personal situation and your health allowed so?

- Yes             Unlikely
- Likely          No
- Don't know

[help2] What would be the main reason not to volunteer?

- I would be worried about getting infected.
- I think that the help would not be useful.
- I would be afraid to be overwhelmed by the situation on site.
- I would be worried that I might not return to Germany if I get infected.
- I would be worried about not being able to get back to Germany because of an entry restriction.
- I think every country should solve its problems by itself without depending on help from other countries.
- Other reason, namely:

[money1] Would you be willing to donate for the fight against Ebola in Africa?

- Yes             Unlikely
- Likely          No
- Don't know

[money2] Which sum would you donate?

If you have already donated: How much have you donated?

▼ money1 != "No"

- Up to 10 Euros
- 11 to 20 Euros
- 21 to 50 Euros
- 51 to 100 Euros
- 101 to 200 Euros
- More than 200 Euros

[money3] Would you support a nonrecurring, compulsory, and income-related payment for the fight against Ebola in Africa?

- Yes             Unlikely
- Likely          No
- Don't know

[money4] Which sum would you pay for the cause?

Please enter as a percentage of your monthly net income.

▼ money3 != "No"

*enter your answer here*

## 10: Vaccination

[vaccination1] If a vaccine against Ebola existed, would you opt for the vaccination even if you do not plan to visit affected countries in West Africa and do not have contact with Ebola patients ever?

- Yes
- No
- Don't know

[vaccination2] Would you still do so if the vaccine was associated with occasional mild side effects?

▼ vaccination1 != "No"

- Yes
- No
- Don't know

[vaccination3] Would you still do so if the vaccine was associated with rare and severe side effects?

▼ vaccination1 != "No"

- Yes
- No
- Don't know

[vaccination4] Should there be a compulsory vaccination against Ebola for the medical staff in Germany?

- Yes
- No
- Don't know

[vaccination5] Should there be a compulsory vaccination against Ebola for the general population in Germany if the number of Ebola cases in Germany increased?

- Yes
- No
- Don't know

[vaccination6] A vaccine must be tested for safety and efficacy. In which country should this be done?

|                                          | Yes                      | No                       | Don't know               |
|------------------------------------------|--------------------------|--------------------------|--------------------------|
| In the country that develops the vaccine | <input type="checkbox"/> | <input type="checkbox"/> | <input type="checkbox"/> |
| In the affected countries of West Africa | <input type="checkbox"/> | <input type="checkbox"/> | <input type="checkbox"/> |

## 11: Activities about Ebola

[info] Have you changed your media use since the Ebola outbreak has become public?

|                                                                                                                                                         | Yes                      | No                       |
|---------------------------------------------------------------------------------------------------------------------------------------------------------|--------------------------|--------------------------|
| I use the Internet more often/in addition to inform myself about Ebola.                                                                                 | <input type="checkbox"/> | <input type="checkbox"/> |
| I use television more often/in addition to inform myself about Ebola.                                                                                   | <input type="checkbox"/> | <input type="checkbox"/> |
| I use the radio more often/in addition to inform myself about Ebola.                                                                                    | <input type="checkbox"/> | <input type="checkbox"/> |
| I use print media more often/in addition to inform myself about Ebola.                                                                                  | <input type="checkbox"/> | <input type="checkbox"/> |
| I use information from public institutions (e.g. Robert Koch-Institute, World Health Organization) more often/in addition to inform myself about Ebola. | <input type="checkbox"/> | <input type="checkbox"/> |

[activity] Did you do something among the following list of actions in connection to Ebola?  
(multiple choice possible)

- Write a letter to the editor or a blog entry about Ebola in a paper or on the Internet
- Write a comment to an article in the Internet (e.g. Tagesschau.de, Spiegel online)
- Discussion in the circle of acquaintances
- Adhered to preventive measures at work
- Donations
- Participation in information events
- Organizing an information event
- Offer to participate in aid missions in Africa
- Offer to help in Germany

[contact] At your workplace, do you have contact to...?

|                                                                        | Yes                      | No                       |
|------------------------------------------------------------------------|--------------------------|--------------------------|
| ... patients or persons in need of care?                               | <input type="checkbox"/> | <input type="checkbox"/> |
| ... more than 10 persons a day (e.g. students, customers, colleagues)? | <input type="checkbox"/> | <input type="checkbox"/> |

## G: Tick-borne infections

Some diseases are transmitted by contact with animals, e.g. through stiches of ticks or mosquitoes. This questionnaire is about your experience with ticks.

### 1: Devices used

First, however, we would like to ask you 3 general questions about which device you use to complete the HaBIDS questionnaires. We can use your answers to optimize the presentation of our questionnaires.

[momentan] Which device have you used most frequently to fill the questionnaires of the HaBIDS study?

- Desktop PC
- Laptop PC
- Tablet PC
- Smartphone
- Internet-enabled game console
- Internet-enabled TV (Smart TV)
- Other device, namely:

[Zoll] How big is the screen of the device taht you have used most often to complete the questionnaires of the HaBIDS study?

You can specify the size (screen diagonal) in inches or cm. A smartphone has e.g. often a size of about 5 inches, a laptop can be 12 to 17 inches in size.

cm: *enter your answer here*

inches: *enter your answer here*

[zufrieden] Are you satisfied with the presentation of the questionnaires?

Please refer to the device you have used most frequently to complete the questionnaires of the HaBIDS study.

- Yes
- No

[change] What can we improve on the presentation of the questionnaires?

▼ zufrieden == "No"

*enter your answer here*

## 2

We continue with questions about your experiences with ticks.

[ZE1beruf] Are you often (at least once a week) professionally in the woods or meadows?

- Yes
- No

[ZE2privat] How often are you privately in the woods or meadows?

- Every day
- Three times or more per week, but not daily
- Once or twice a week
- Less than once a week
- Never



### 3

[ZE3ges] Did you see a tick in summer 2014?

- Yes
- No
- Don't know

[ZE3ges\_NS] Was it in Lower Saxony?

▼ ZE3ges == "Yes"

- Yes
- No
- Don't know

[ZE4gest] Have you ever been bitten by a tick in your life?

- Yes
- No
- Don't know

[ZE5som] Were you bitten by a tick in summer 2014?

▼ ZE4gest == "Yes"

- Yes
- No
- Don't know

[ZE5som\_ofst] How many times have you been bitten by a tick this summer?

▼ ZE5som == "Yes"

*enter your answer here*

[ZE5som\_NS] Was it at least once in Lower Saxony?

▼ ZE5som == "Yes"

- Yes
- No
- Don't know

## 4

[ZE6know] How do you assess the following statements?

|                                                                                 | Applies                  | Rather applies           | Does rather not apply    | Does not apply           | Don't know               |
|---------------------------------------------------------------------------------|--------------------------|--------------------------|--------------------------|--------------------------|--------------------------|
| [1] Borreliosis is transmitted by ticks.                                        | <input type="checkbox"/> | <input type="checkbox"/> | <input type="checkbox"/> | <input type="checkbox"/> | <input type="checkbox"/> |
| [2] Borreliosis is a serious disease.                                           | <input type="checkbox"/> | <input type="checkbox"/> | <input type="checkbox"/> | <input type="checkbox"/> | <input type="checkbox"/> |
| [3] Children are particularly at risk of getting infected with borreliosis.     | <input type="checkbox"/> | <input type="checkbox"/> | <input type="checkbox"/> | <input type="checkbox"/> | <input type="checkbox"/> |
| [4] I am worried about getting infected with borreliosis.                       | <input type="checkbox"/> | <input type="checkbox"/> | <input type="checkbox"/> | <input type="checkbox"/> | <input type="checkbox"/> |
| [5] The disease early summer meningoencephalitis (TBE) is transmitted by ticks. | <input type="checkbox"/> | <input type="checkbox"/> | <input type="checkbox"/> | <input type="checkbox"/> | <input type="checkbox"/> |
| [6] TBE is a serious disease.                                                   | <input type="checkbox"/> | <input type="checkbox"/> | <input type="checkbox"/> | <input type="checkbox"/> | <input type="checkbox"/> |
| [7] Children are particularly at risk of getting infected with TBE.             | <input type="checkbox"/> | <input type="checkbox"/> | <input type="checkbox"/> | <input type="checkbox"/> | <input type="checkbox"/> |
| [8] I am worried about getting infected with TBE.                               | <input type="checkbox"/> | <input type="checkbox"/> | <input type="checkbox"/> | <input type="checkbox"/> | <input type="checkbox"/> |

## 5

[ZE7bor] Have you ever been diagnosed with borreliosis by a doctor?

- No
- Yes, it was in (please enter year):

[ZE7bor\_symp] What was the reason for the fact that you were diagnosed with borreliosis?  
(multiple choice possible)

▼ (ZE7bor == "Yes")

- I was bitten by a tick and had it removed from the doctor.
- After a tick bite, a red spot spread out from the puncture point of the tick (erythema migrans).
- After a tick bite, I had joint pain.
- After a tick bite, I had a headache.
- After a tick bite, I had a fever.
- I went to the doctor because of joint pain (regardless of a tick bite).
- I went to the doctor because of headache (regardless of a tick bite).
- I went to the doctor because of fever (regardless of a tick bite).
- Other circumstance, namely:

[ZE8bor\_di] Do you know someone who has been diagnosed with borreliosis?

- Yes
- No

## 6

The following questions refer to the tick vaccination.

[ZE9im] Have you ever heard of tick vaccination?

- Yes
- No

[ZE9im] How do you assess the following statements?

|                                                                                      | Applies                  | Rather applies           | Does rather not apply    | Does not apply           | Don't know               |
|--------------------------------------------------------------------------------------|--------------------------|--------------------------|--------------------------|--------------------------|--------------------------|
| [bor] The tick vaccination protects against borreliosis.                             | <input type="checkbox"/> | <input type="checkbox"/> | <input type="checkbox"/> | <input type="checkbox"/> | <input type="checkbox"/> |
| [FSME] The tick vaccination protects against early summer meningoencephalitis (TBE). | <input type="checkbox"/> | <input type="checkbox"/> | <input type="checkbox"/> | <input type="checkbox"/> | <input type="checkbox"/> |

[ZE9im\_er] Have you ever received a tick vaccination?

- Yes
- No
- Don't know

# 7

[ZE10ver] Do you think that the following behaviors can reduce the risk of being bitten by a tick?

|                                                                      | Protects very well       | Protects well            | Doesn't protect well     | Doesn't protect at all   | Don't know               |
|----------------------------------------------------------------------|--------------------------|--------------------------|--------------------------|--------------------------|--------------------------|
| [1] Avoid walks in the woods                                         | <input type="checkbox"/> | <input type="checkbox"/> | <input type="checkbox"/> | <input type="checkbox"/> | <input type="checkbox"/> |
| [2] Avoid walks on meadows                                           | <input type="checkbox"/> | <input type="checkbox"/> | <input type="checkbox"/> | <input type="checkbox"/> | <input type="checkbox"/> |
| [3] Wear long clothing when staying in the woods or on meadows       | <input type="checkbox"/> | <input type="checkbox"/> | <input type="checkbox"/> | <input type="checkbox"/> | <input type="checkbox"/> |
| [4] Wear ankle-high shoes when staying in the woods or meadows       | <input type="checkbox"/> | <input type="checkbox"/> | <input type="checkbox"/> | <input type="checkbox"/> | <input type="checkbox"/> |
| [5] Put pants in the socks                                           | <input type="checkbox"/> | <input type="checkbox"/> | <input type="checkbox"/> | <input type="checkbox"/> | <input type="checkbox"/> |
| [6] Application of anti-tick agents                                  | <input type="checkbox"/> | <input type="checkbox"/> | <input type="checkbox"/> | <input type="checkbox"/> | <input type="checkbox"/> |
| [7] After staying in the woods or meadows, search the body for ticks | <input type="checkbox"/> | <input type="checkbox"/> | <input type="checkbox"/> | <input type="checkbox"/> | <input type="checkbox"/> |

[ZE11bew] The following is about the right procedure when one is bitten by a tick. How do you assess the following statements?

|                                                                                   | Very important           | Rather important         | Rather important         | Unimportant              | Don't know               |
|-----------------------------------------------------------------------------------|--------------------------|--------------------------|--------------------------|--------------------------|--------------------------|
| [1] The tick should be removed immediately.                                       | <input type="checkbox"/> | <input type="checkbox"/> | <input type="checkbox"/> | <input type="checkbox"/> | <input type="checkbox"/> |
| [2] You should go to the doctor to have the tick removed.                         | <input type="checkbox"/> | <input type="checkbox"/> | <input type="checkbox"/> | <input type="checkbox"/> | <input type="checkbox"/> |
| [3] Before removing, an alcoholic solution should be applied to the tick.         | <input type="checkbox"/> | <input type="checkbox"/> | <input type="checkbox"/> | <input type="checkbox"/> | <input type="checkbox"/> |
| [4] Before removing, an ointment, e.g. toothpaste, should be applied to the tick. | <input type="checkbox"/> | <input type="checkbox"/> | <input type="checkbox"/> | <input type="checkbox"/> | <input type="checkbox"/> |
| [5] Before removing, oil should be applied to the tick.                           | <input type="checkbox"/> | <input type="checkbox"/> | <input type="checkbox"/> | <input type="checkbox"/> | <input type="checkbox"/> |
| [6] You should pull the tick straight out.                                        | <input type="checkbox"/> | <input type="checkbox"/> | <input type="checkbox"/> | <input type="checkbox"/> | <input type="checkbox"/> |
| [7] You should turn the tick out.                                                 | <input type="checkbox"/> | <input type="checkbox"/> | <input type="checkbox"/> | <input type="checkbox"/> | <input type="checkbox"/> |

[ZE13nach] How do you proceed after a tick bite or how would you proceed?

|                                                                        | In any case              | Rather yes               | Rather no                | No way                   | Don't know               |
|------------------------------------------------------------------------|--------------------------|--------------------------|--------------------------|--------------------------|--------------------------|
| [1] I remove the tick immediately.                                     | <input type="checkbox"/> | <input type="checkbox"/> | <input type="checkbox"/> | <input type="checkbox"/> | <input type="checkbox"/> |
| [2] I go to the doctor to get the tick removed.                        | <input type="checkbox"/> | <input type="checkbox"/> | <input type="checkbox"/> | <input type="checkbox"/> | <input type="checkbox"/> |
| [3] Before removing, I apply an alcoholic solution to the tick.        | <input type="checkbox"/> | <input type="checkbox"/> | <input type="checkbox"/> | <input type="checkbox"/> | <input type="checkbox"/> |
| [4] Before removal, I apply an ointment, e.g. toothpaste, to the tick. | <input type="checkbox"/> | <input type="checkbox"/> | <input type="checkbox"/> | <input type="checkbox"/> | <input type="checkbox"/> |
| [5] Before removing, I apply oil to the tick.                          | <input type="checkbox"/> | <input type="checkbox"/> | <input type="checkbox"/> | <input type="checkbox"/> | <input type="checkbox"/> |
| [6] I pull the tick straight out.                                      | <input type="checkbox"/> | <input type="checkbox"/> | <input type="checkbox"/> | <input type="checkbox"/> | <input type="checkbox"/> |
| [7] I turn the tick out.                                               | <input type="checkbox"/> | <input type="checkbox"/> | <input type="checkbox"/> | <input type="checkbox"/> | <input type="checkbox"/> |

[ZE12schutz] What do you personally do to protect yourself from ticks?

|                                                                          | Always                   | Often                    | Sometimes                | Never                    | Don't know               |
|--------------------------------------------------------------------------|--------------------------|--------------------------|--------------------------|--------------------------|--------------------------|
| [1] I avoid going into the woods.                                        | <input type="checkbox"/> | <input type="checkbox"/> | <input type="checkbox"/> | <input type="checkbox"/> | <input type="checkbox"/> |
| [2] I avoid going on meadows.                                            | <input type="checkbox"/> | <input type="checkbox"/> | <input type="checkbox"/> | <input type="checkbox"/> | <input type="checkbox"/> |
| [3] I wear long clothes when I go into the woods or meadows.             | <input type="checkbox"/> | <input type="checkbox"/> | <input type="checkbox"/> | <input type="checkbox"/> | <input type="checkbox"/> |
| [4] I wear ankle-high shoes when I go into the woods or meadows.         | <input type="checkbox"/> | <input type="checkbox"/> | <input type="checkbox"/> | <input type="checkbox"/> | <input type="checkbox"/> |
| [5] I put my pants in my socks when I walk into the woods or meadows.    | <input type="checkbox"/> | <input type="checkbox"/> | <input type="checkbox"/> | <input type="checkbox"/> | <input type="checkbox"/> |
| [6] I use anti-tick agents.                                              | <input type="checkbox"/> | <input type="checkbox"/> | <input type="checkbox"/> | <input type="checkbox"/> | <input type="checkbox"/> |
| [7] After the stay in the woods or meadows, I search the body for ticks. | <input type="checkbox"/> | <input type="checkbox"/> | <input type="checkbox"/> | <input type="checkbox"/> | <input type="checkbox"/> |

## H: Antibiotics

In this part of the questionnaire, we ask you about antibiotics. Antibiotics are drugs that can slow down or kill pathogens in their growth. Infections are caused by pathogens and are often associated with fever. In Germany antibiotics must be prescribed by a doctor.

This survey contains 9 questions. At the end of the survey, you'll also find a free text field where you can make entries if you want to tell us something about antibiotics.

### 1: Questions about antibiotics

[Antibiotika] Please remember the last 12 months. How often have you been prescribed an antibiotic during this period?

- Not at all
- Once
- Two to three times
- Four times or more
- Don't know

[Beschwerden] On what complaints did you get prescribed antibiotics the last time?  
(multiple choice possible)

▼ Antibiotika >= "Once"

- Cough
- Sore throat
- Earache
- Burning when urinating
- Wound / soft tissue inflammation
- Don't know
- Others, namely:

[Antibiotikum\_jemals] Have you ever taken antibiotics in your life?

▼ Antibiotika == "Not at all"

- Yes
- No
- Don't know

## 2: Knowledge

[AN] How do you assess the following statements?

|                                                                                                                                                                                              | Applies                  | Rather applies           | Does rather not apply    | Does not apply           | Don't know               |
|----------------------------------------------------------------------------------------------------------------------------------------------------------------------------------------------|--------------------------|--------------------------|--------------------------|--------------------------|--------------------------|
| [1] Antibiotics act against bacteria.                                                                                                                                                        | <input type="checkbox"/> | <input type="checkbox"/> | <input type="checkbox"/> | <input type="checkbox"/> | <input type="checkbox"/> |
| [2] Antibiotics act against viruses.                                                                                                                                                         | <input type="checkbox"/> | <input type="checkbox"/> | <input type="checkbox"/> | <input type="checkbox"/> | <input type="checkbox"/> |
| [3] Penicillin is an antibiotic.                                                                                                                                                             | <input type="checkbox"/> | <input type="checkbox"/> | <input type="checkbox"/> | <input type="checkbox"/> | <input type="checkbox"/> |
| [4] Paracetamol is an antibiotic.                                                                                                                                                            | <input type="checkbox"/> | <input type="checkbox"/> | <input type="checkbox"/> | <input type="checkbox"/> | <input type="checkbox"/> |
| [5] Ibuprofen is an antibiotic.                                                                                                                                                              | <input type="checkbox"/> | <input type="checkbox"/> | <input type="checkbox"/> | <input type="checkbox"/> | <input type="checkbox"/> |
| [6] If an antibiotic is not taken as recommended by the doctor, the risk of pathogens becoming resistant to this antibiotic increases. That is, they are no longer killed by the antibiotic. | <input type="checkbox"/> | <input type="checkbox"/> | <input type="checkbox"/> | <input type="checkbox"/> | <input type="checkbox"/> |
| [7] Those who are more likely to take antibiotics have a higher risk that the body becomes immune to antibiotics. That is, the antibiotics no longer work.                                   | <input type="checkbox"/> | <input type="checkbox"/> | <input type="checkbox"/> | <input type="checkbox"/> | <input type="checkbox"/> |
| [8] I have ever asked my general practioner for the prescription of an antibiotic because of a cold.                                                                                         | <input type="checkbox"/> | <input type="checkbox"/> | <input type="checkbox"/> | <input type="checkbox"/> | <input type="checkbox"/> |
| [9] I have antibiotics at home and take them if necessary.                                                                                                                                   | <input type="checkbox"/> | <input type="checkbox"/> | <input type="checkbox"/> | <input type="checkbox"/> | <input type="checkbox"/> |

[Art] I have the following antibiotic / antibiotics at home:

▼ AN\_9 != "Does not apply"

Antibiotic 1: *enter your answer here*

Antibiotic 2: *enter your answer here*



### 3

[AN] How do you assess the following statements?

Please answer spontaneously.

|                                                                                                                         | Applies                  | Rather applies           | Does rather not apply    | Does not apply           | Don't know               |
|-------------------------------------------------------------------------------------------------------------------------|--------------------------|--------------------------|--------------------------|--------------------------|--------------------------|
| [10] I usually take antibiotics exactly as recommended by the doctor or pharmacist.                                     | <input type="checkbox"/> | <input type="checkbox"/> | <input type="checkbox"/> | <input type="checkbox"/> | <input type="checkbox"/> |
| [11] I stop taking an antibiotic as soon as I can get better.                                                           | <input type="checkbox"/> | <input type="checkbox"/> | <input type="checkbox"/> | <input type="checkbox"/> | <input type="checkbox"/> |
| [12] When a relative becomes ill, I share my antibiotic with him / her.                                                 | <input type="checkbox"/> | <input type="checkbox"/> | <input type="checkbox"/> | <input type="checkbox"/> | <input type="checkbox"/> |
| [13] I don't use antibiotics.                                                                                           | <input type="checkbox"/> | <input type="checkbox"/> | <input type="checkbox"/> | <input type="checkbox"/> | <input type="checkbox"/> |
| [14] The development of antibiotic resistance is my concern. (Antibiotics lose their effectiveness through resistance.) | <input type="checkbox"/> | <input type="checkbox"/> | <input type="checkbox"/> | <input type="checkbox"/> | <input type="checkbox"/> |

#### 4

[Nebenwirkungen] During the last antibiotic use, I suffered from the following side effects:  
(multiple choice possible)

▼ Antibiotikum\_jemals != "0"

- None
- Allergic reaction
- Skin rash
- Diarrhea
- Nausea
- Other:

[Th\_beendet] If you have stopped the therapy at an early stage, why?  
(multiple choice possible)

▼ Antibiotikum\_jemals != "No"

- Because I had forgotten it
- Because I had too much stress
- Because I had already felt better
- Because I had feared side effects
- Because side effects occurred
- Other reason, namely:

[AN] How do you assess the following statements?

Please answer spontaneously.

When answering the following questions, please refer to the last time you took antibiotics.

▼ Antibiotikum\_jemals != "No"

|                                                                                                           | Applies                  | Rather applies           | Does rather not apply    | Does not apply           | Don't know               |
|-----------------------------------------------------------------------------------------------------------|--------------------------|--------------------------|--------------------------|--------------------------|--------------------------|
| [15] The last time I was prescribed an antibiotic, I asked my doctor for the prescription of antibiotics. | <input type="checkbox"/> | <input type="checkbox"/> | <input type="checkbox"/> | <input type="checkbox"/> | <input type="checkbox"/> |
| [16] I have taken the recommended number of pills per day.                                                | <input type="checkbox"/> | <input type="checkbox"/> | <input type="checkbox"/> | <input type="checkbox"/> | <input type="checkbox"/> |
| [17] I have taken the pills in the recommended time intervals.                                            | <input type="checkbox"/> | <input type="checkbox"/> | <input type="checkbox"/> | <input type="checkbox"/> | <input type="checkbox"/> |
| [18] I have adhered to the recommended duration of treatment (e.g. 7 days).                               | <input type="checkbox"/> | <input type="checkbox"/> | <input type="checkbox"/> | <input type="checkbox"/> | <input type="checkbox"/> |

## 5: Remarks

[AN\_remark] Is there anything else you would like to tell us about this questionnaire?  
*enter your answer here*

# I: Social contact patterns (winter)

This questionnaire is about how many people you have contact with in one day.

Contact means that you have spoken with one person more than 10 words and were not more than 2 meters away from that person. Shaking hands or kissing is also counted (i.e., whenever you touch a person's skin). You can fill in the contacts for yesterday, or wait until tomorrow and fill in the contacts retrospectively for today.

If you have a lot of contact with other people, that is, more than 10 contacts with customers, pupils, students, colleagues, etc., you don't need to list these professional contacts individually.

To make sure that you don't forget any contact outside of work / education / school, we suggest that you try to keep your records in mind all day. Your appointment book may be useful. Since it can be difficult not to mess with the contacts, we suggest that you first write down all contact persons on paper and then pass the information. You can also take notes during the day and enter your contacts in the evening.

## 1: Regular contacts in work / education / school

"Contact" means, for example:

You spoke to a person and the distance was no more than two meters. Please don't enter any contacts that have been made by telephone only.

or

You have touched the skin of another person (for example, shaking hands, kissing, contact sports ...).

[Kontakt] Do you regularly have a lot of contact with other people, in other words, more than 10 contacts with customers, pupils, students, colleagues, etc.?

Yes

No

[Kontakt\_zu] I regularly have lots of contact with...

(multiple choice possible)

▼ Kontakt == "Yes"

Customers

Pupils

Students

Patients

Colleagues

Other (please specify):

[Kontakt\_anz] With how many people (customers, students, patients, etc.) per day do you regularly have lots of contact?

Please include the persons who you only meet during work / training or at school. Please don't include these persons in the following questions. There, please enter only the persons you have met (also) private.

▼ Kontakt == "Yes"

*enter your answer here*

## 2: How to register your contacts

On the next pages of the survey, you can enter your contacts into such a table:

|     | Age       |              | Sex                      |                          | Place of contact         |                          |                                    |                                         |                          | Have you touched the skin of this contact person? |                          | How often do you usually have contact with this person? |                          |                          |                          | Total time spent with the person |                          |                          |                          | How many people with these characteristics did you meet? |                          |                          |                 |
|-----|-----------|--------------|--------------------------|--------------------------|--------------------------|--------------------------|------------------------------------|-----------------------------------------|--------------------------|---------------------------------------------------|--------------------------|---------------------------------------------------------|--------------------------|--------------------------|--------------------------|----------------------------------|--------------------------|--------------------------|--------------------------|----------------------------------------------------------|--------------------------|--------------------------|-----------------|
|     | Exact age | or age range | Female                   | Male                     | At home                  | At work                  | Kindergarten / school / university | Means of transport (train, car, bus...) | Leisure time             | Other (please specify):                           | Yes                      | No                                                      | (Almost) every day       | A few times a week       | A few times a month      | A few times a year or less often | The first time           | Less than 5 minutes      | 5 to 15 minutes          |                                                          | 15 minutes to 1 hour     | 1 to 4 hours             | 4 hours or more |
| [1] |           |              | <input type="checkbox"/> | <input type="checkbox"/> | <input type="checkbox"/> | <input type="checkbox"/> | <input type="checkbox"/>           | <input type="checkbox"/>                | <input type="checkbox"/> | <input type="checkbox"/>                          | <input type="checkbox"/> | <input type="checkbox"/>                                | <input type="checkbox"/> | <input type="checkbox"/> | <input type="checkbox"/> | <input type="checkbox"/>         | <input type="checkbox"/> | <input type="checkbox"/> | <input type="checkbox"/> | <input type="checkbox"/>                                 | <input type="checkbox"/> | <input type="checkbox"/> |                 |

If you don't enter anything in the last column, we assume that you have only one person with these properties.

[weiter] Click "Next" to start entering your contacts.

If you don't want to continue this survey, please let us know:

I don't want to continue the survey.

### **3: Interpersonal contacts in leisure time**

We would like to ask you to enter all the contacts which have taken place within one day in the following questionnaire. Look out day, e.g. yesterday. Please refer to a total of 24 hours.

[Datum] Please specify the date of the day for which you complete the questionnaire for your personal contacts.

*enter your answer here*

#### 4: Contacts 1 - 10

|      | Age       |              | Sex                      |                          | Place of contact         |                          |                                    |                                         |                          |                          | Have you touched the skin of this person? |                          | How often do you usually have contact with this person? |                          |                          |                                  |                          | Total time spent with the person |                          |                          |                          | How many people with these characteristics did you meet? |                 |
|------|-----------|--------------|--------------------------|--------------------------|--------------------------|--------------------------|------------------------------------|-----------------------------------------|--------------------------|--------------------------|-------------------------------------------|--------------------------|---------------------------------------------------------|--------------------------|--------------------------|----------------------------------|--------------------------|----------------------------------|--------------------------|--------------------------|--------------------------|----------------------------------------------------------|-----------------|
|      | Exact age | or age range | Female                   | Male                     | At home                  | At work                  | Kindergarten / school / university | Means of transport (train, car, bus...) | Leisure time             | Other (please specify):  | Yes                                       | No                       | (Almost) every day                                      | A few times a week       | A few times a month      | A few times a year or less often | The first time           | Less than 5 minutes              | 5 to 15 minutes          | 15 minutes to 1 hour     | 1 to 4 hours             |                                                          | 4 hours or more |
| [1]  |           |              | <input type="checkbox"/> | <input type="checkbox"/> | <input type="checkbox"/> | <input type="checkbox"/> | <input type="checkbox"/>           | <input type="checkbox"/>                | <input type="checkbox"/> | <input type="checkbox"/> | <input type="checkbox"/>                  | <input type="checkbox"/> | <input type="checkbox"/>                                | <input type="checkbox"/> | <input type="checkbox"/> | <input type="checkbox"/>         | <input type="checkbox"/> | <input type="checkbox"/>         | <input type="checkbox"/> | <input type="checkbox"/> | <input type="checkbox"/> | <input type="checkbox"/>                                 |                 |
| [2]  |           |              | <input type="checkbox"/> | <input type="checkbox"/> | <input type="checkbox"/> | <input type="checkbox"/> | <input type="checkbox"/>           | <input type="checkbox"/>                | <input type="checkbox"/> | <input type="checkbox"/> | <input type="checkbox"/>                  | <input type="checkbox"/> | <input type="checkbox"/>                                | <input type="checkbox"/> | <input type="checkbox"/> | <input type="checkbox"/>         | <input type="checkbox"/> | <input type="checkbox"/>         | <input type="checkbox"/> | <input type="checkbox"/> | <input type="checkbox"/> | <input type="checkbox"/>                                 |                 |
| [3]  |           |              | <input type="checkbox"/> | <input type="checkbox"/> | <input type="checkbox"/> | <input type="checkbox"/> | <input type="checkbox"/>           | <input type="checkbox"/>                | <input type="checkbox"/> | <input type="checkbox"/> | <input type="checkbox"/>                  | <input type="checkbox"/> | <input type="checkbox"/>                                | <input type="checkbox"/> | <input type="checkbox"/> | <input type="checkbox"/>         | <input type="checkbox"/> | <input type="checkbox"/>         | <input type="checkbox"/> | <input type="checkbox"/> | <input type="checkbox"/> | <input type="checkbox"/>                                 |                 |
| [4]  |           |              | <input type="checkbox"/> | <input type="checkbox"/> | <input type="checkbox"/> | <input type="checkbox"/> | <input type="checkbox"/>           | <input type="checkbox"/>                | <input type="checkbox"/> | <input type="checkbox"/> | <input type="checkbox"/>                  | <input type="checkbox"/> | <input type="checkbox"/>                                | <input type="checkbox"/> | <input type="checkbox"/> | <input type="checkbox"/>         | <input type="checkbox"/> | <input type="checkbox"/>         | <input type="checkbox"/> | <input type="checkbox"/> | <input type="checkbox"/> | <input type="checkbox"/>                                 |                 |
| [5]  |           |              | <input type="checkbox"/> | <input type="checkbox"/> | <input type="checkbox"/> | <input type="checkbox"/> | <input type="checkbox"/>           | <input type="checkbox"/>                | <input type="checkbox"/> | <input type="checkbox"/> | <input type="checkbox"/>                  | <input type="checkbox"/> | <input type="checkbox"/>                                | <input type="checkbox"/> | <input type="checkbox"/> | <input type="checkbox"/>         | <input type="checkbox"/> | <input type="checkbox"/>         | <input type="checkbox"/> | <input type="checkbox"/> | <input type="checkbox"/> | <input type="checkbox"/>                                 |                 |
| [6]  |           |              | <input type="checkbox"/> | <input type="checkbox"/> | <input type="checkbox"/> | <input type="checkbox"/> | <input type="checkbox"/>           | <input type="checkbox"/>                | <input type="checkbox"/> | <input type="checkbox"/> | <input type="checkbox"/>                  | <input type="checkbox"/> | <input type="checkbox"/>                                | <input type="checkbox"/> | <input type="checkbox"/> | <input type="checkbox"/>         | <input type="checkbox"/> | <input type="checkbox"/>         | <input type="checkbox"/> | <input type="checkbox"/> | <input type="checkbox"/> | <input type="checkbox"/>                                 |                 |
| [7]  |           |              | <input type="checkbox"/> | <input type="checkbox"/> | <input type="checkbox"/> | <input type="checkbox"/> | <input type="checkbox"/>           | <input type="checkbox"/>                | <input type="checkbox"/> | <input type="checkbox"/> | <input type="checkbox"/>                  | <input type="checkbox"/> | <input type="checkbox"/>                                | <input type="checkbox"/> | <input type="checkbox"/> | <input type="checkbox"/>         | <input type="checkbox"/> | <input type="checkbox"/>         | <input type="checkbox"/> | <input type="checkbox"/> | <input type="checkbox"/> | <input type="checkbox"/>                                 |                 |
| [8]  |           |              | <input type="checkbox"/> | <input type="checkbox"/> | <input type="checkbox"/> | <input type="checkbox"/> | <input type="checkbox"/>           | <input type="checkbox"/>                | <input type="checkbox"/> | <input type="checkbox"/> | <input type="checkbox"/>                  | <input type="checkbox"/> | <input type="checkbox"/>                                | <input type="checkbox"/> | <input type="checkbox"/> | <input type="checkbox"/>         | <input type="checkbox"/> | <input type="checkbox"/>         | <input type="checkbox"/> | <input type="checkbox"/> | <input type="checkbox"/> | <input type="checkbox"/>                                 |                 |
| [9]  |           |              | <input type="checkbox"/> | <input type="checkbox"/> | <input type="checkbox"/> | <input type="checkbox"/> | <input type="checkbox"/>           | <input type="checkbox"/>                | <input type="checkbox"/> | <input type="checkbox"/> | <input type="checkbox"/>                  | <input type="checkbox"/> | <input type="checkbox"/>                                | <input type="checkbox"/> | <input type="checkbox"/> | <input type="checkbox"/>         | <input type="checkbox"/> | <input type="checkbox"/>         | <input type="checkbox"/> | <input type="checkbox"/> | <input type="checkbox"/> | <input type="checkbox"/>                                 |                 |
| [10] |           |              | <input type="checkbox"/> | <input type="checkbox"/> | <input type="checkbox"/> | <input type="checkbox"/> | <input type="checkbox"/>           | <input type="checkbox"/>                | <input type="checkbox"/> | <input type="checkbox"/> | <input type="checkbox"/>                  | <input type="checkbox"/> | <input type="checkbox"/>                                | <input type="checkbox"/> | <input type="checkbox"/> | <input type="checkbox"/>         | <input type="checkbox"/> | <input type="checkbox"/>         | <input type="checkbox"/> | <input type="checkbox"/> | <input type="checkbox"/> | <input type="checkbox"/>                                 |                 |

[weiter\_10] Would you like to add more contacts?

Yes

No

#### 5: Contacts 11 - 20

...

[Participants could fill in up to 70 contacts]

## 10: Contacts 61 - 70

## 11: Thank you for your participation

[verstaendlich] Thank you for completing the questionnaire. We now have a few questions to you about the survey itself and how you have coped with completing it. The answers help us to improve the survey and make it more comprehensible. How do you assess the following statements?

|                                                                                                                | Strongly agree           | Agree                    | Disagree                 | Strongly disagree        |
|----------------------------------------------------------------------------------------------------------------|--------------------------|--------------------------|--------------------------|--------------------------|
| [1] Completing the survey was easy.                                                                            | <input type="checkbox"/> | <input type="checkbox"/> | <input type="checkbox"/> | <input type="checkbox"/> |
| [2] Completing the survey went quickly.                                                                        | <input type="checkbox"/> | <input type="checkbox"/> | <input type="checkbox"/> | <input type="checkbox"/> |
| [3] It was difficult to keep track of which contact has already been registered during the completion process. | <input type="checkbox"/> | <input type="checkbox"/> | <input type="checkbox"/> | <input type="checkbox"/> |

[Anmerkung] Would you like to tell us anything else?

*enter your answer here*



# J: Frequency of infections during the winter season & influenza vaccination (season 2014/15)

In this questionnaire, we are interested in whether you had an infection of the respiratory tract in the past months and whether you were vaccinated against influenza in the autumn / winter season 2014/15.

## 1: Signs and symptoms

[IN1\_2015] How often have you had an infection of the airways (for example, cold, flu, or otitis media) in the past 12 months?

- Not at all
- Once
- Twice
- Three to four times
- More than four times
- Don't know

[GR\_1] Since September 2014, have you had an infection with high fever (body temperature above 38° C) lasting several days?

- Yes
- No
- I'm not sure

[GR\_2] How many days did you have malaise?

▼ GR\_1 != "No"

*enter your answer here*

[GR\_3] How many days did you have high fever (body temperature above 38° C)?

▼ GR\_1 != "No"

*enter your answer here*

[GR\_4] Did you have other symptoms besides fever?

▼ GR\_1 != "No"

|                         | Yes                      | No                       | Don't know               |
|-------------------------|--------------------------|--------------------------|--------------------------|
| [1] Throat pain         | <input type="checkbox"/> | <input type="checkbox"/> | <input type="checkbox"/> |
| [2] Dry cough           | <input type="checkbox"/> | <input type="checkbox"/> | <input type="checkbox"/> |
| [3] Muscle pain         | <input type="checkbox"/> | <input type="checkbox"/> | <input type="checkbox"/> |
| [4] Joint pain          | <input type="checkbox"/> | <input type="checkbox"/> | <input type="checkbox"/> |
| [5] Back pain           | <input type="checkbox"/> | <input type="checkbox"/> | <input type="checkbox"/> |
| [6] Headaches           | <input type="checkbox"/> | <input type="checkbox"/> | <input type="checkbox"/> |
| [7] Feeling of weakness | <input type="checkbox"/> | <input type="checkbox"/> | <input type="checkbox"/> |

[GR\_4\_8] Other symptoms:

▼ GR\_1 != "No"

*enter your answer here*

## 2: Seeking medical advice

[GR\_5] Did you see a doctor because of this infection?

▼ GR\_1 != "No"

- Yes
- No

[GR\_6] Did the doctor take a sample to diagnose a flu?

▼ (GR\_5 == "Yes")

- Yes
- No

[GR\_7] Did the doctor diagnose a real flu or other disease, e.g. pneumonia, otitis media, or similar?

▼ (GR\_1 != "No") & (GR\_5 == "Yes")

- The doctor has not made any diagnosis.
- The doctor has diagnosed a real flu.
- The doctor has diagnosed another illness, namely:

### 3: Characteristics of the disease

[GR\_8] How many days were you so ill that you had to stay in bed or could not pursue your normal everyday life (housework, hobbies etc.)?

▼ GR\_1 != "No"

*enter your answer here*

[GR\_9] How many days did you report ill and could not pursue your profession?

▼ GR\_1 != "No"

Does not apply to me

Days:

[GR\_10] How many of these {GR\_9} days were you on ill leave?

▼ (GR\_9 > "0")

Does not apply to me

Days:

[GR\_11] Do you think that this disease might have been the real flu?

Yes

No

I'm not sure

[GR\_11\_comment\_1] Why do you think it was a real flu?

▼ GR\_11 == "Yes"

*enter your answer here*

[GR\_11\_comment\_0] Why do you think it was not a real flu?

▼ GR\_11 == "No"

*enter your answer here*

## 4: Household

[P2\_hh\_single] Do you live alone in your household?

If you live in several households (e.g. weekend commuters), please refer to the household where you spend most of your time.

- Yes
- No

[P2\_hh\_p] How many people, including yourself, are living in your household?

A household includes all persons who live and work together here. Please also think of all children living in the household.

▼ P2\_hh\_single == "No"

*enter your answer here*

[P2\_hh\_age1] How old are the member of your household (including yourself)?

Please start with the youngest member. For children under one year, please enter "0".

▼ P2\_hh\_single == "No"

- [1] Age (in years)
- [2] Age (in years)
- [3] Age (in years)
- [4] Age (in years)
- [5] Age (in years)
- [6] Age (in years)
- [7] Age (in years)
- [8] Age (in years)
- [9] Age (in years)
- [10] Age (in years)

[GR\_12] Are there among those household members people who are particularly vulnerable to flu, e.g. elderly or chronically ill persons?

▼ P2\_hh\_single == "No"

- No
- I am not sure
- Yes, number of persons:

## 5: Household II

[GR\_13] Since September 2014, did someone from your household (not counting you) have an disease with high fever (body temperature above 38° C) lasting several days?

▼ P2\_hh\_single == "No"

- Yes
- No
- I'm not sure

[GR\_14] How many persons from your household (not counting you) have had an disease with high fever (body temperature above 38° C) lasting several days?

▼ GR\_13 == "Yes"

*enter your answer here*

[GR\_15] Do you think that this disease might have been the real flu?

▼ GR\_13 == "Yes"

- Yes
- No
- I'm not sure

[GR\_15\_comment\_1] Why do you think it was a real flu?

▼ GR\_15 == "Yes"

*enter your answer here*

[GR\_15\_comment\_0] Why do you think it was not a real flu?

▼ GR\_15 == "No"

*enter your answer here*

[GR\_16] If you think of your infection with high fever, were the other ill person(s) in your household ill before, at the same time or after yourself?

With this question we would like to find out whether there was any contagion within your household. Please tick all that apply.

(multiple choice possible)

▼ (GR\_1 == "Yes") & (GR\_13 == "Yes")

- In my household, one or more people were ill within two weeks before myself.
- In my household, one or more people were ill within two weeks after myself.
- In my household, one or more people were ill with me at the same time.
- In my household, one or more people were ill at another time, that is, not within 2 weeks before or after my own illness.
- I don't know when the other person(s) in my household was ill.

## 6: Influenza vaccination

[GR\_17] Have you been vaccinated against influenza since August 2014?

- Yes
- No
- I'm not sure

[GR\_18] When did you get vaccinated against flu?

▼ GR\_17 == "Yes"

*enter your answer here*

[GR\_19] Where was the influenza vaccination performed?

▼ GR\_17 == "Yes"

- General practioner
- Company doctor
- Gynecologist
- Pediatrician
- Somewhere else

[GR\_20] Was this influenza vaccination recorded in your vaccination card?

▼ GR\_17 == "Yes"

- I don't have a vaccination card.
- Yes
- No
- Don't know

[GR\_21] Did you have to pay for the influenza vaccination?

▼ GR\_17 == "Yes"

- Yes
- No
- Don't know

[GR\_21\_Zahlung] How much did you have to pay?

▼ GR\_21 == "Yes"

*enter your answer here*

[GR\_22] Would you have been vaccinated against influenza if you had to pay for the vaccination? (The vaccination costs about 20 euros.)

▼ GR\_21 == "No"

- Yes
- No
- Don't know

[GR\_23] After the influenza vaccination, did you have any complaints that you have associated with vaccination?

▼ GR\_17 == "Yes"

- No
- Yes (please specify):

## 7: Influenza vaccination II

[GR\_24] Did anyone give you the advice or recommendation to get vaccinated against influenza?

- Yes
- No
- Don't know

[GR\_25] Who gave you the advice or recommendation to get vaccinated against flu?  
(multiple choice possible)

▼ GR\_24 == "Yes"

- General practioner
- Gynecologist
- Pediatrician
- Family
- Someone else, namely:

[GR\_26] Was the fact that someone gave you the advice or recommendation to get vaccinated against influenza very important for your decision to get vaccinated?

▼ (GR\_17 == "Yes") & (GR\_24 == "Yes")

- Yes
- No

[GR\_27] Has your company / employer recommended the vaccination, e.g. email, notice on the bulletin board or similar?

- Yes
- No
- Does not apply to me

[GR\_28] Was the fact that your company / employer recommended the vaccination very important for your decision to get vaccinated?

▼ (GR\_17 == "Yes") & (GR\_27 == "Yes")

- Yes
- No

## 8: Influenza vaccination III

[GR\_29] Do you work in the medical field and have patient contact?

- Yes
- No

[GR\_30] Was the fact that you have patient contact very important for your decision to get vaccinated?

▼ (GR\_17 == "Yes") & (GR\_29 == "Yes")

- Yes
- No

[GR\_31] Was the fact that your household is home to a person for whom a flu would be particularly harmful, very important for your decision to get vaccinated?

▼ (GR\_17 == "Yes") & (GR\_12 == "Yes")

- Yes
- No



## 9: Reason for influenza vaccination

[GR\_32] Did you have the impression that in the media the influenza wave was shown as particularly strong in winter 2014/2015?

- Yes
- No

[GR\_33] Was the fact that in the media the flu wave in the winter 2014/2015 was shown as particularly strong very important for your decision to get vaccinated?

▼ (GR\_17 == "Yes") & (GR\_32 == "Yes")

- Yes
- No

[GR\_34] Was the fact that you did not want to get influenza yourself very important for your decision to get vaccinated?

▼ GR\_17 == "Yes"

- Yes
- No

[GR\_35] Please summarize briefly why you have decided to get vaccinated:

▼ GR\_17 == "Yes"

*enter your answer here*

## 10: Statements about influenza vaccination

How do you assess the following two statements?

[GR\_36] The information about the influenza vaccination, which I receive through the media, allows me to make a decision on whether to vaccinate myself or not.

- Applies
- Rather applies
- Does rather not apply
- Does not apply
- I have not received any such information through the media.

[GR\_37] The information about the influenza vaccination, which I receive through the media, is clear to me.

- Applies
- Rather applies
- Does rather not apply
- Does not apply
- I have not received any such information through the media.

## 11: Recommendation influenza vaccination

[GR\_38] For which groups of persons is the influenza vaccination recommended by the Standing Immunization Commission (STIKO) at the Robert Koch Institute?

|                                                                                  | Yes                      | No                       | Don't know               |
|----------------------------------------------------------------------------------|--------------------------|--------------------------|--------------------------|
| [1] For the elderly over 60 years.                                               | <input type="checkbox"/> | <input type="checkbox"/> | <input type="checkbox"/> |
| [2] For all adults over 18 years.                                                | <input type="checkbox"/> | <input type="checkbox"/> | <input type="checkbox"/> |
| [3] For persons with increased health risk due to chronic condition.             | <input type="checkbox"/> | <input type="checkbox"/> | <input type="checkbox"/> |
| [4] For children who visit a children's day-care center.                         | <input type="checkbox"/> | <input type="checkbox"/> | <input type="checkbox"/> |
| [5] For persons who work in the medical field and have contact with the patient. | <input type="checkbox"/> | <input type="checkbox"/> | <input type="checkbox"/> |
| [6] For women who are pregnant during the winter half year.                      | <input type="checkbox"/> | <input type="checkbox"/> | <input type="checkbox"/> |

## 12: Outlook influenza vaccination

[GR\_39\_f] Do you belong to one of the following groups?

(multiple choice possible)

- I am over 60 years old.
- I have a chronic condition.
- I have a child / children visiting a children's day.
- I gave birth to a child between September 2014 and March 2015.
- I am currently pregnant.
- I don't belong to one of these groups.

[GR\_40] Are you planning to get vaccinated against influenza in the autumn / winter season 2015/16?

- Yes
- No
- Not decided yet

[GR\_41] Have your experiences with the influenza vaccination in the 2014/15 season affected your decision for the autumn / winter season 2015/16?

▼ GR\_17 == "Yes"

- Yes
- No
- Don't know

[GR\_42] How did your experiences with the influenza vaccination in the 2014/15 season influence your decision for the autumn / winter season 2015/16?

▼ GR\_41 == "Yes"

*enter your answer here*

[GR\_remark] Is there anything else you would like to tell us about this questionnaire?

*enter your answer here*

## **K: Sexual contact patterns & medical history**

The risk of getting an infection may be related to whether or not you are suffering from another condition. In the following, we are therefore interested in diseases which are not infections. These include e.g. sugar disease, heart attack or allergies.

### **1: Information about yourself and general health**

For the analysis of this survey, it is very important that we analyse the questions separately by gender and age group. The frequency and severity of many diseases differs depending on gender or age. Unfortunately, not all participants have entered gender and age. We would therefore ask you to enter these two details here (regardless of whether you have already made this information).

[sex\_ON11] What is your gender?

- Female
- Male

[geb\_dat\_ON11] In which year were you born?

*enter your answer here*

[health\_2015] How would you describe your health condition in general?

- Excellent
- Very good
- Good
- Fair
- Poor

[QoL] How satisfied are you with your quality of life?

- Very satisfied
- Satisfied
- Rather satisfied
- Rather dissatisfied
- Dissatisfied

## 2: Known diseases

[ANAM\_1] Have you ever been diagnosed with a disease by a doctor (infections excluded)?

- Yes  
 No  
 Don't know

[ANAM\_2] Have you ever been in a hospital because of an illness (infections excluded)?

- Yes  
 No  
 Don't know

[ANAM\_3] Do you currently take any medication for a disease (infections excluded)?

- Yes  
 No  
 Don't know

[ANAM\_4] What are the diseases?

▼ (ANAM\_1 == "Yes") OR (ANAM\_2 == "Yes") OR (ANAM\_3 == "Yes")

|                                                                                                                                                                                            | Yes                      | No                       | Don't know               |
|--------------------------------------------------------------------------------------------------------------------------------------------------------------------------------------------|--------------------------|--------------------------|--------------------------|
| [1] Cardiovascular disease<br>e.g. stroke, heart attack, hypertension, cardiac arrhythmia, circulatory problems in the legs, cardiac insufficiency or constriction of the coronary vessels | <input type="checkbox"/> | <input type="checkbox"/> | <input type="checkbox"/> |
| [2] Cancer                                                                                                                                                                                 | <input type="checkbox"/> | <input type="checkbox"/> | <input type="checkbox"/> |
| [3] Metabolic disease<br>e.g. sugar disease, increased blood lipid, gout or thyroid disease                                                                                                | <input type="checkbox"/> | <input type="checkbox"/> | <input type="checkbox"/> |
| [4] Muscle-skeletal disease<br>e.g. osteoporosis, osteoarthritis or back pain for 3 months or longer                                                                                       | <input type="checkbox"/> | <input type="checkbox"/> | <input type="checkbox"/> |
| [5] Pulmonary disease<br>e.g. chronic bronchitis or asthma                                                                                                                                 | <input type="checkbox"/> | <input type="checkbox"/> | <input type="checkbox"/> |
| [6] Allergy                                                                                                                                                                                | <input type="checkbox"/> | <input type="checkbox"/> | <input type="checkbox"/> |
| [7] Gastrointestinal or liver disease<br>e.g. heartburn, stomach ulcer, Crohn's disease, bile stones or liver cirrhosis                                                                    | <input type="checkbox"/> | <input type="checkbox"/> | <input type="checkbox"/> |
| [8] Skin disease<br>e.g. neurodermatitis or psoriasis                                                                                                                                      | <input type="checkbox"/> | <input type="checkbox"/> | <input type="checkbox"/> |
| [9] Kidney disease                                                                                                                                                                         | <input type="checkbox"/> | <input type="checkbox"/> | <input type="checkbox"/> |
| [10] Neurological disease<br>e.g. migraine, epilepsy, multiple sclerosis, or Parkinson's disease                                                                                           | <input type="checkbox"/> | <input type="checkbox"/> | <input type="checkbox"/> |
| [11] Psychiatric disease<br>e.g. depression or anxiety disease                                                                                                                             | <input type="checkbox"/> | <input type="checkbox"/> | <input type="checkbox"/> |
| [12] Other (not listed) disease                                                                                                                                                            | <input type="checkbox"/> | <input type="checkbox"/> | <input type="checkbox"/> |

[ANAM\_4\_12\_text] What other (not listed) disease is it?

▼ ANAM\_4\_12 == "Yes"

*enter your answer here*

### 3: Cardiovascular diseases

[ANAM\_5] Which cardiovascular disease is / was it?

(multiple choice possible)

▼ ANAM\_4\_1 == "Yes"

- Stroke
- Heart attack
- High blood pressure
- Arrhythmia
- Circulation disease in the legs
- Cardiac insufficiency
- Narrowing of the coronary vessels or angina pectoris
- Others, namely:

[ANAM\_6] When was the stroke? If you had multiple strokes, please refer to the first stroke only.

Please indicate your age at the time of the first diagnosis or the year of the first diagnosis, whichever you remember better.

▼ (ANAM\_4\_1 == "Yes") AND (ANAM\_5\_1 == "Yes")

Age: *enter your answer here*

Year: *enter your answer here*

[ANAM\_7] Are you currently in medical treatment because of a stroke?

▼ (ANAM\_4\_1 == "Yes") AND (ANAM\_5\_1 == "Yes")

- Yes
- No

[ANAM\_8] When was the heart attack? If you had multiple heart attacks, please refer to the first heart attack only.

Please indicate your age at the time of the first diagnosis or the year of the first diagnosis, whichever you remember better.

▼ (ANAM\_4\_1 == "Yes") AND (ANAM\_5\_2 == "Yes")

Age: *enter your answer here*

Year: *enter your answer here*

[ANAM\_9] Are you currently in medical treatment because of heart attack?

▼ (ANAM\_4\_1 == "Yes") AND (ANAM\_5\_2 == "Yes")

- Yes
- No

[ANAM\_10] When did hypertension occur for the first time?

Please indicate your age at the time of the first diagnosis or the year of the first diagnosis, whichever you remember better.

▼ (ANAM\_4\_1 == "Yes") AND (ANAM\_5\_3 == "Yes")

Age: *enter your answer here*

Year: *enter your answer here*

[ANAM\_11] Are you currently in medical treatment because of hypertension?

▼ (ANAM\_4\_1 == "Yes") AND (ANAM\_5\_3 == "Yes")

- Yes
- No

[ANAM\_12] When did arrhythmias occur for the first time?

Please indicate your age at the time of the first diagnosis or the year of the first diagnosis, whichever you remember better.

▼ (ANAM\_4\_1 == "Yes") AND (ANAM\_5\_4 == "Yes")

Age: *enter your answer here*

Year: *enter your answer here*

[ANAM\_13] Are you currently in medical treatment because of arrhythmias?

▼ (ANAM\_4\_1 == "Yes") AND (ANAM\_5\_4 == "Yes")

Yes

No

[ANAM\_14] When did circulatory problems in the legs occur for the first time?

Please indicate your age at the time of the first diagnosis or the year of the first diagnosis, whichever you remember better.

▼ (ANAM\_4\_1 == "Yes") AND (ANAM\_5\_5 == "Yes")

Age: *enter your answer here*

Year: *enter your answer here*

[ANAM\_15] Are you currently in medical treatment because of circulatory problems in the legs?

▼ (ANAM\_4\_1 == "Yes") AND (ANAM\_5\_5 == "Yes")

Yes

No

[ANAM\_16] When did cardiac insufficiency occur for the first time?

Please indicate your age at the time of the first diagnosis or the year of the first diagnosis, whichever you remember better.

▼ (ANAM\_4\_1 == "Yes") AND (ANAM\_5\_6 == "Yes")

Age: *enter your answer here*

Year: *enter your answer here*

[ANAM\_17] Are you currently in medical treatment because of cardiac insufficiency?

▼ (ANAM\_4\_1 == "Yes") AND (ANAM\_5\_6 == "Yes")

Yes

No

[ANAM\_18] When did angina pectoris occur for the first time?

Please indicate your age at the time of the first diagnosis or the year of the first diagnosis, whichever you remember better.

▼ (ANAM\_4\_1 == "Yes") AND (ANAM\_5\_7 == "Yes")

Age: *enter your answer here*

Year: *enter your answer here*

[ANAM\_19] Are you currently in medical treatment because of angina pectoris?

▼ (ANAM\_4\_1 == "Yes") AND (ANAM\_5\_7 == "Yes")

Yes

No

[ANAM\_20] When did {ANAM\_5\_other} occur for the first time?

Please indicate your age at the time of the first diagnosis or the year of the first diagnosis, whichever you remember better.

▼ (ANAM\_4\_1 == "Yes") AND (! (is\_empty(ANAM\_5\_other)))

Age: *enter your answer here*

Year: *enter your answer here*

[ANAM\_21] Are you currently in medical treatment because of {ANAM\_5\_other}?

▼ (ANAM\_4\_1 == "Yes") AND (! (is\_empty(ANAM\_5\_other)))

Yes

No



## 4: Cancer

[ANAM\_22\_f] Which cancer is / was it?

(multiple choice possible)

▼ (ANAM\_4\_2 == "Yes") AND (sex\_ON11 == "Female")

- Lung
- Intestine
- Mammary gland
- Uterine body (endometrium)
- Cervix
- Ovaries
- Bladder
- Malignant melanoma of the skin (black skin cancer)
- Pancreas
- Stomach
- Kidney and urinary tract
- Mouth and throat
- Non-Hodgkin lymphoma
- Hodgkin's disease
- Leukemia
- Liver
- Esophagus
- Brain
- Thyroid
- Bone
- Larynx
- Gallbladder
- Others, namely:

[ANAM\_22\_m] Which cancer is / was it?

(multiple choice possible)

▼ (ANAM\_4\_2 == "Yes") AND (sex\_ON11 == "Male")

- Lung
- Intestine
- Prostate
- Testicle
- Mammary gland
- Bladder
- Malignant melanoma of the skin (black skin cancer)
- Pancreas
- Stomach
- Kidney and urinary tract
- Mouth and throat
- Non-Hodgkin lymphoma
- Hodgkin's disease
- Leukemia
- Liver
- Esophagus
- Brain
- Thyroid
- Bone
- Larynx
- Gallbladder
- Others, namely:

[ANAM\_23] When did cancer of the lung occur for the first time?

Please indicate your age at the time of the first diagnosis or the year of the first diagnosis, whichever you remember better.

▼ (ANAM\_4\_2 == "Yes") AND (ANAM\_22\_f\_1 == "Yes" OR ANAM\_22\_m\_1 == "Yes")

Age: *enter your answer here*

Year: *enter your answer here*

[ANAM\_24] Are you currently in medical treatment because of cancer of the lung?

▼ (ANAM\_4\_2 == "Yes") AND (ANAM\_22\_f\_1 == "Yes" OR ANAM\_22\_m\_1 == "Yes")

Yes

No

[ANAM\_25] When did cancer of the intestine occur for the first time?

Please indicate your age at the time of the first diagnosis or the year of the first diagnosis, whichever you remember better.

▼ (ANAM\_4\_2 == "Yes") AND (ANAM\_22\_f\_2 == "Yes" OR ANAM\_22\_m\_2 == "Yes")

Age: *enter your answer here*

Year: *enter your answer here*

[ANAM\_26] Are you currently in medical treatment because of cancer of the intestine?

▼ (ANAM\_4\_2 == "Yes") AND (ANAM\_22\_f\_2 == "Yes" OR ANAM\_22\_m\_2 == "Yes")

Yes

No

[ANAM\_27] When did cancer of the prostate occur for the first time?

Please indicate your age at the time of the first diagnosis or the year of the first diagnosis, whichever you remember better.

▼ (ANAM\_4\_2 == "Yes") AND (ANAM\_22\_m\_3 == "Yes")

Age: *enter your answer here*

Year: *enter your answer here*

[ANAM\_28] Are you currently in medical treatment because of cancer of the prostate?

▼ (ANAM\_4\_2 == "Yes") AND (ANAM\_22\_m\_3 == "Yes")

Yes

No

[ANAM\_29] When did cancer of the testicle occur for the first time?

Please indicate your age at the time of the first diagnosis or the year of the first diagnosis, whichever you remember better.

▼ (ANAM\_4\_2 == "Yes") AND (ANAM\_22\_m\_4 == "Yes")

Age: *enter your answer here*

Year: *enter your answer here*

[ANAM\_30] Are you currently in medical treatment because of cancer of the testicle?

▼ (ANAM\_4\_2 == "Yes") AND (ANAM\_22\_m\_4 == "Yes")

Yes

No

[ANAM\_31] When did cancer of the mammary gland occur for the first time?

Please indicate your age at the time of the first diagnosis or the year of the first diagnosis, whichever you remember better.

▼ (ANAM\_4\_2 == "Yes") AND (ANAM\_22\_f\_5 == "Yes" OR ANAM\_22\_m\_5 == "Yes")

Age: *enter your answer here*

Year: *enter your answer here*

[ANAM\_32] Are you currently in medical treatment because of cancer of the mammary gland?

▼ (ANAM\_4\_2 == "Yes") AND (ANAM\_22\_f\_5 == "Yes" OR ANAM\_22\_m\_5 == "Yes")

Yes

No

[ANAM\_33] When did cancer of the uterine body (endometrium) occur for the first time?

Please indicate your age at the time of the first diagnosis or the year of the first diagnosis, whichever you remember better.

▼ (ANAM\_4\_2 == "Yes") AND (ANAM\_22\_f\_6 == "Yes")

Age: *enter your answer here*

Year: *enter your answer here*

[ANAM\_34] Are you currently in medical treatment because of cancer of the uterine body (endometrium)?

▼ (ANAM\_4\_2 == "Yes") AND (ANAM\_22\_f\_6 == "Yes")

Yes

No

[ANAM\_35] When did cancer of the cervix occur for the first time?

Please indicate your age at the time of the first diagnosis or the year of the first diagnosis, whichever you remember better.

▼ (ANAM\_4\_2 == "Yes") AND (ANAM\_22\_f\_7 == "Yes")

Age: *enter your answer here*

Year: *enter your answer here*

[ANAM\_36] Are you currently in medical treatment because of cancer of the cervix?

▼ (ANAM\_4\_2 == "Yes") AND (ANAM\_22\_f\_7 == "Yes")

Yes

No

[ANAM\_37] When did cancer of the ovaries occur for the first time?

Please indicate your age at the time of the first diagnosis or the year of the first diagnosis, whichever you remember better.

▼ (ANAM\_4\_2 == "Yes") AND (ANAM\_22\_f\_8 == "Yes")

Age: *enter your answer here*

Year: *enter your answer here*

[ANAM\_38] Are you currently in medical treatment because of cancer of the ovaries?

▼ (ANAM\_4\_2 == "Yes") AND (ANAM\_22\_f\_8 == "Yes")

Yes

No

[ANAM\_39] When did cancer of the bladder occur for the first time?

Please indicate your age at the time of the first diagnosis or the year of the first diagnosis, whichever you remember better.

▼ (ANAM\_4\_2 == "Yes") AND (ANAM\_22\_f\_9 == "Yes" OR ANAM\_22\_m\_9 == "Yes")

Age: *enter your answer here*

Year: *enter your answer here*

[ANAM\_40] Are you currently in medical treatment because of cancer of the bladder?

▼ (ANAM\_4\_2 == "Yes") AND (ANAM\_22\_f\_9 == "Yes" OR ANAM\_22\_m\_9 == "Yes")

Yes

No

[ANAM\_41] When did black skin cancer occur for the first time?

Please indicate your age at the time of the first diagnosis or the year of the first diagnosis, whichever you remember better.

▼ (ANAM\_4\_2 == "Yes") AND (ANAM\_22\_f\_10 == "Yes" OR ANAM\_22\_m\_10 == "Yes")

Age: *enter your answer here*

Year: *enter your answer here*

[ANAM\_42] Are you currently in medical treatment because of black skin cancer?

▼ (ANAM\_4\_2 == "Yes") AND (ANAM\_22\_f\_10 == "Yes" OR ANAM\_22\_m\_10 == "Yes")

Yes

No

[ANAM\_43] When did cancer of the pancreas occur for the first time?

Please indicate your age at the time of the first diagnosis or the year of the first diagnosis, whichever you remember better.

▼ (ANAM\_4\_2 == "Yes") AND (ANAM\_22\_f\_11 == "Yes" OR ANAM\_22\_m\_11 == "Yes")

Age: *enter your answer here*

Year: *enter your answer here*

[ANAM\_44] Are you currently in medical treatment because of cancer of the pancreas?

▼ (ANAM\_4\_2 == "Yes") AND (ANAM\_22\_f\_11 == "Yes" OR ANAM\_22\_m\_11 == "Yes")

Yes

No

[ANAM\_45] When did cancer of the stomach occur for the first time?

Please indicate your age at the time of the first diagnosis or the year of the first diagnosis, whichever you remember better.

▼ (ANAM\_4\_2 == "Yes") AND (ANAM\_22\_f\_12 == "Yes" OR ANAM\_22\_m\_12 == "Yes")

Age: *enter your answer here*

Year: *enter your answer here*

[ANAM\_46] Are you currently in medical treatment because of cancer of the stomach?

▼ (ANAM\_4\_2 == "Yes") AND (ANAM\_22\_f\_12 == "Yes" OR ANAM\_22\_m\_12 == "Yes")

Yes

No

[ANAM\_47] When did cancer of the kidney and urinary tract occur for the first time?

Please indicate your age at the time of the first diagnosis or the year of the first diagnosis, whichever you remember better.

▼ (ANAM\_4\_2 == "Yes") AND (ANAM\_22\_f\_13 == "Yes" OR ANAM\_22\_m\_13 == "Yes")

Age: *enter your answer here*

Year: *enter your answer here*

[ANAM\_48] Are you currently in medical treatment because of cancer of the kidney and urinary tract?

▼ (ANAM\_4\_2 == "Yes") AND (ANAM\_22\_f\_13 == "Yes" OR ANAM\_22\_m\_13 == "Yes")

Yes

No

[ANAM\_49] When did cancer of the mouth and throat occur for the first time?

Please indicate your age at the time of the first diagnosis or the year of the first diagnosis, whichever you remember better.

▼ (ANAM\_4\_2 == "Yes") AND (ANAM\_22\_f\_14 == "Yes" OR ANAM\_22\_m\_14 == "Yes")

Age: *enter your answer here*

Year: *enter your answer here*

[ANAM\_50] Are you currently in medical treatment because of cancer of the mouth and throat?

▼ (ANAM\_4\_2 == "Yes") AND (ANAM\_22\_f\_14 == "Yes" OR ANAM\_22\_m\_14 == "Yes")

Yes

No

[ANAM\_51] When did non-Hodgkin lymphoma occur for the first time?

Please indicate your age at the time of the first diagnosis or the year of the first diagnosis, whichever you remember better.

▼ (ANAM\_4\_2 == "Yes") AND (ANAM\_22\_f\_15 == "Yes" OR ANAM\_22\_m\_15 == "Yes")

Age: *enter your answer here*

Year: *enter your answer here*

[ANAM\_52] Are you currently in medical treatment because of non-Hodgkin lymphoma?

▼ (ANAM\_4\_2 == "Yes") AND (ANAM\_22\_f\_15 == "Yes" OR ANAM\_22\_m\_15 == "Yes")

Yes

No

[ANAM\_53] When did Hodgkin's disease occur for the first time?

Please indicate your age at the time of the first diagnosis or the year of the first diagnosis, whichever you remember better.

▼ (ANAM\_4\_2 == "Yes") AND (ANAM\_22\_f\_16 == "Yes" OR ANAM\_22\_m\_16 == "Yes")

Age: *enter your answer here*

Year: *enter your answer here*

[ANAM\_54] Are you currently in medical treatment because of Hodgkin's disease?

▼ (ANAM\_4\_2 == "Yes") AND (ANAM\_22\_f\_16 == "Yes" OR ANAM\_22\_m\_16 == "Yes")

Yes

No

[ANAM\_55] When did leukemia occur for the first time?

Please indicate your age at the time of the first diagnosis or the year of the first diagnosis, whichever you remember better.

▼ (ANAM\_4\_2 == "Yes") AND (ANAM\_22\_f\_17 == "Yes" OR ANAM\_22\_m\_17 == "Yes")

Age: *enter your answer here*

Year: *enter your answer here*

[ANAM\_56] Are you currently in medical treatment because of leukemia?

▼ (ANAM\_4\_2 == "Yes") AND (ANAM\_22\_f\_17 == "Yes" OR ANAM\_22\_m\_17 == "Yes")

Yes

No

[ANAM\_57] When did cancer of the liver occur for the first time?

Please indicate your age at the time of the first diagnosis or the year of the first diagnosis, whichever you remember better.

▼ (ANAM\_4\_2 == "Yes") AND (ANAM\_22\_f\_18 == "Yes" OR ANAM\_22\_m\_18 == "Yes")

Age: *enter your answer here*

Year: *enter your answer here*

[ANAM\_58] Are you currently in medical treatment because of cancer of the liver?

▼ (ANAM\_4\_2 == "Yes") AND (ANAM\_22\_f\_18 == "Yes" OR ANAM\_22\_m\_18 == "Yes")

Yes

No

[ANAM\_59] When did cancer of the esophagus occur for the first time?

Please indicate your age at the time of the first diagnosis or the year of the first diagnosis, whichever you remember better.

▼ (ANAM\_4\_2 == "Yes") AND (ANAM\_22\_f\_19 == "Yes" OR ANAM\_22\_m\_19 == "Yes")

Age: *enter your answer here*

Year: *enter your answer here*

[ANAM\_60] Are you currently in medical treatment because of cancer of the esophagus?

▼ (ANAM\_4\_2 == "Yes") AND (ANAM\_22\_f\_19 == "Yes" OR ANAM\_22\_m\_19 == "Yes")

Yes

No

[ANAM\_61] When did cancer of the brain occur for the first time?

Please indicate your age at the time of the first diagnosis or the year of the first diagnosis, whichever you remember better.

▼ (ANAM\_4\_2 == "Yes") AND (ANAM\_22\_f\_20 == "Yes" OR ANAM\_22\_m\_20 == "Yes")

Age: *enter your answer here*

Year: *enter your answer here*

[ANAM\_62] Are you currently in medical treatment because of cancer of the brain?

▼ (ANAM\_4\_2 == "Yes") AND (ANAM\_22\_f\_20 == "Yes" OR ANAM\_22\_m\_20 == "Yes")

Yes

No

[ANAM\_63] When did cancer of the thyroid occur for the first time?

Please indicate your age at the time of the first diagnosis or the year of the first diagnosis, whichever you remember better.

▼ (ANAM\_4\_2 == "Yes") AND (ANAM\_22\_f\_21 == "Yes" OR ANAM\_22\_m\_21 == "Yes")

Age: *enter your answer here*

Year: *enter your answer here*

[ANAM\_64] Are you currently in medical treatment because of cancer of the thyroid?

▼ (ANAM\_4\_2 == "Yes") AND (ANAM\_22\_f\_21 == "Yes" OR ANAM\_22\_m\_21 == "Yes")

Yes

No

[ANAM\_65] When did cancer of the bones occur for the first time?

Please indicate your age at the time of the first diagnosis or the year of the first diagnosis, whichever you remember better.

▼ (ANAM\_4\_2 == "Yes") AND (ANAM\_22\_f\_22 == "Yes" OR ANAM\_22\_m\_22 == "Yes")

Age: *enter your answer here*

Year: *enter your answer here*

[ANAM\_66] Are you currently in medical treatment because of cancer of the bones?

▼ (ANAM\_4\_2 == "Yes") AND (ANAM\_22\_f\_22 == "Yes" OR ANAM\_22\_m\_22 == "Yes")

Yes

No

[ANAM\_67] When did cancer of the larynx occur for the first time?

Please indicate your age at the time of the first diagnosis or the year of the first diagnosis, whichever you remember better.

▼ (ANAM\_4\_2 == "Yes") AND (ANAM\_22\_f\_23 == "Yes" OR ANAM\_22\_m\_23 == "Yes")

Age: *enter your answer here*

Year: *enter your answer here*

[ANAM\_68] Are you currently in medical treatment because of cancer of the larynx?

▼ (ANAM\_4\_2 == "Yes") AND (ANAM\_22\_f\_23 == "Yes" OR ANAM\_22\_m\_23 == "Yes")

Yes

No

[ANAM\_69] When did cancer of the gallbladder occur for the first time?

Please indicate your age at the time of the first diagnosis or the year of the first diagnosis, whichever you remember better.

▼ (ANAM\_4\_2 == "Yes") AND (ANAM\_22\_f\_24 == "Yes" OR ANAM\_22\_m\_24 == "Yes")

Age: *enter your answer here*

Year: *enter your answer here*

[ANAM\_70] Are you currently in medical treatment because of cancer of the gallbladder?

▼ (ANAM\_4\_2 == "Yes") AND (ANAM\_22\_f\_24 == "Yes" OR ANAM\_22\_m\_24 == "Yes")

Yes

No

[ANAM\_71] When did {ANAM\_22\_f\_other}{ANAM\_22\_m\_other} occur for the first time?

Please indicate your age at the time of the first diagnosis or the year of the first diagnosis, whichever you remember better.

▼ (ANAM\_4\_2 == "Yes") AND ( ! (is\_empty(ANAM\_22\_f\_other)) OR ( ! (is\_empty(ANAM\_22\_m\_other))

Age: *enter your answer here*

Year: *enter your answer here*

[ANAM\_72] Are you currently in medical treatment because of {ANAM\_22\_f\_other}{ANAM\_22\_m\_other}?

▼ (ANAM\_4\_2 == "Yes") AND ( ! (is\_empty(ANAM\_22\_f\_other)) OR ( ! (is\_empty(ANAM\_22\_m\_other))

Yes

No

## 5: Metabolic diseases

[ANAM\_73] Which metabolic disease is / was it?

(multiple choice possible)

▼ ANAM\_4\_3 == "Yes"

- Sugar disease or diabetes mellitus
- Increased blood lipids or cholesterol or triglycerides
- Gout or a uric acid disease
- Hyperfunction of the thyroid gland (hyperthyroidism)
- Underactive thyroid (hypothyroidism)
- Others, namely:

[ANAM\_74] When did diabetes occur for the first time?

Please indicate your age at the time of the first diagnosis or the year of the first diagnosis, whichever you remember better.

▼ (ANAM\_4\_3 == "Yes") AND (ANAM\_73\_1 == "Yes")

Age: *enter your answer here*

Year: *enter your answer here*

[ANAM\_75] Have you been diagnosed with diabetes for the first time during pregnancy?

▼ (ANAM\_4\_3 == "Yes") AND (ANAM\_73\_1 == "Yes") AND (sex\_ON11 == "2")

- Yes
- No
- Don't know

[ANAM\_76] How are you currently being treated? Please also think of injected insulin and insulin pumps.

▼ (ANAM\_4\_3 == "Yes") AND (ANAM\_73\_1 == "Yes")

- Only with insulin
- Only with tablets
- With insulin and tablets
- Only dietary
- No treatment
- Don't know
- Others, namely:

[ANAM\_77] How long have you been treated?

Please indicate either your age at the beginning of the treatment or the year of commencement of treatment, whichever you remember better.

▼ (ANAM\_4\_3 == "Yes") AND (ANAM\_73\_1 == "Yes") AND (ANAM\_76 != "No treatment")

Age: *enter your answer here*

Year: *enter your answer here*

[ANAM\_78] When did increased blood lipids occur for the first time?

Please indicate your age at the time of the first diagnosis or the year of the first diagnosis, whichever you remember better.

▼ (ANAM\_4\_3 == "Yes") AND (ANAM\_73\_2 == "Yes")

Age: *enter your answer here*

Year: *enter your answer here*

[ANAM\_79] Are you currently in medical treatment because of increased blood lipids?

▼ (ANAM\_4\_3 == "Yes") AND (ANAM\_73\_2 == "Yes")

- Yes
- No



[ANAM\_80] When did gout occur for the first time?

Please indicate your age at the time of the first diagnosis or the year of the first diagnosis, whichever you remember better.

▼ (ANAM\_4\_3 == "Yes") AND (ANAM\_73\_3 == "Yes")

Age: *enter your answer here*

Year: *enter your answer here*

[ANAM\_81] Are you currently in medical treatment because of gout?

▼ (ANAM\_4\_3 == "Yes") AND (ANAM\_73\_3 == "Yes")

Yes

No

[ANAM\_82] When did {if(ANAM\_73\_4 == "Yes", "hyperthyroidism", "hypothyroidism")} occur for the first time? Please indicate your age at the time of the first diagnosis or the year of the first diagnosis, whichever you remember better.

▼ (ANAM\_4\_3 == "Yes") AND ((ANAM\_73\_4 == "Yes") OR (ANAM\_73\_5 == "Yes"))

Age: *enter your answer here*

Year: *enter your answer here*

[ANAM\_83] How are you currently being treated?

▼ (ANAM\_4\_3 == "Yes") AND ((ANAM\_73\_4 == "Yes") OR (ANAM\_73\_5 == "Yes"))

Thyroid hormones

Radioiodine therapy

Irradiation in the neck area

Thyroid surgery

Iodine tablets

No treatment

Don't know

Others, namely:

[ANAM\_84] How long have you been treated?

Please indicate either your age at the beginning of the treatment or the year of commencement of treatment, whichever you remember better.

▼ (ANAM\_4\_3 == "Yes") AND ((ANAM\_73\_4 == "Yes") OR (ANAM\_73\_5 == "Yes")) AND (ANAM\_83 != "No treatment")

Age: *enter your answer here*

Year: *enter your answer here*

[ANAM\_85] When did {ANAM\_73\_other} occur for the first time?

Please indicate your age at the time of the first diagnosis or the year of the first diagnosis, whichever you remember better.

▼ (ANAM\_4\_3 == "Yes") AND (! (is\_empty(ANAM\_73\_other)))

Age: *enter your answer here*

Year: *enter your answer here*

[ANAM\_86] Are you currently in medical treatment because of {ANAM\_73\_other}?

▼ (ANAM\_4\_3 == "Yes") AND (! (is\_empty(ANAM\_73\_other)))

Yes

No

## 6: Musculoskeletal diseases

[ANAM\_87] When did a musculoskeletal disease occur for the first time?

Please indicate your age at the time of the first diagnosis or the year of the first diagnosis, whichever you remember better.

▼ ANAM\_4\_4 == "Yes"

Age: *enter your answer here*

Year: *enter your answer here*

[ANAM\_88] Which musculoskeletal disease is / was it?

*enter your answer here*

[ANAM\_89] Are you currently in medical treatment because of {ANAM\_88}?

Yes

No

## 7: Lung diseases

[ANAM\_90] When did a lung disease occur for the first time?

Please indicate your age at the time of the first diagnosis or the year of the first diagnosis, whichever you remember better.

▼ ANAM\_4\_5 == "Yes"

Age: *enter your answer here*

Year: *enter your answer here*

[ANAM\_91] Which lung disease is / was it?

*enter your answer here*

[ANAM\_92] Are you currently in medical treatment because of {ANAM\_91}?

Yes

No

## 8: Allergies

[ANAM\_93] Which allergy is / was it?

(multiple choice possible)

▼ ANAM\_4\_6 == "Yes"

- Hay fever (pollen allergy)
- Insect venom allergy
- Food allergy
- House dust allergy
- Animal hair allergy
- Contact allergy
- Drug allergy
- Others, namely:

[ANAM\_94] When did hay fever occur for the first time?

Please indicate your age at the time of the first diagnosis or the year of the first diagnosis, whichever you remember better.

▼ (ANAM\_4\_6 == "Yes") AND (ANAM\_93\_1 == "Yes")

Age: *enter your answer here*

Year: *enter your answer here*

[ANAM\_95] Are you currently in medical treatment because of hay fever?

▼ (ANAM\_4\_6 == "Yes") AND (ANAM\_93\_1 == "Yes")

- Yes
- No

[ANAM\_96] When did insect venom allergy occur for the first time?

Please indicate your age at the time of the first diagnosis or the year of the first diagnosis, whichever you remember better.

▼ (ANAM\_4\_6 == "Yes") AND (ANAM\_93\_2 == "Yes")

Age: *enter your answer here*

Year: *enter your answer here*

[ANAM\_97] Are you currently in medical treatment because of insect venom allergy?

▼ (ANAM\_4\_6 == "Yes") AND (ANAM\_93\_2 == "Yes")

- Yes
- No

[ANAM\_98] When did food allergy occur for the first time?

Please indicate your age at the time of the first diagnosis or the year of the first diagnosis, whichever you remember better.

▼ (ANAM\_4\_6 == "Yes") AND (ANAM\_93\_3 == "Yes")

Age: *enter your answer here*

Year: *enter your answer here*

[ANAM\_99] Are you currently in medical treatment because of food allergy?

▼ (ANAM\_4\_6 == "Yes") AND (ANAM\_93\_3 == "Yes")

- Yes
- No

[ANAM\_100] When did house dust allergy occur for the first time?

Please indicate your age at the time of the first diagnosis or the year of the first diagnosis, whichever you remember better.

▼ (ANAM\_4\_6 == "Yes") AND (ANAM\_93\_4 == "Yes")

Age: *enter your answer here*

Year: *enter your answer here*

[ANAM\_101] Are you currently in medical treatment because of house dust allergy?

▼ (ANAM\_4\_6 == "Yes") AND (ANAM\_93\_4 == "Yes")

Yes

No

[ANAM\_102] When did animal hair allergy occur for the first time?

Please indicate your age at the time of the first diagnosis or the year of the first diagnosis, whichever you remember better.

▼ (ANAM\_4\_6 == "Yes") AND (ANAM\_93\_5 == "Yes")

Age: *enter your answer here*

Year: *enter your answer here*

[ANAM\_103] Are you currently in medical treatment because of animal hair allergy?

▼ (ANAM\_4\_6 == "Yes") AND (ANAM\_93\_5 == "Yes")

Yes

No

[ANAM\_104] When did contact allergy occur for the first time?

Please indicate your age at the time of the first diagnosis or the year of the first diagnosis, whichever you remember better.

▼ (ANAM\_4\_6 == "Yes") AND (ANAM\_93\_6 == "Yes")

Age: *enter your answer here*

Year: *enter your answer here*

[ANAM\_105] Are you currently in medical treatment because of contact allergy?

▼ (ANAM\_4\_6 == "Yes") AND (ANAM\_93\_6 == "Yes")

Yes

No

[ANAM\_106] When did drug allergy occur for the first time?

Please indicate your age at the time of the first diagnosis or the year of the first diagnosis, whichever you remember better.

▼ (ANAM\_4\_6 == "Yes") AND (ANAM\_93\_7 == "Yes")

Age: *enter your answer here*

Year: *enter your answer here*

[ANAM\_107] Are you currently in medical treatment because of drug allergy?

▼ (ANAM\_4\_6 == "Yes") AND (ANAM\_93\_7 == "Yes")

Yes

No

[ANAM\_108] When did {ANAM\_93\_other} occur for the first time?

Please indicate your age at the time of the first diagnosis or the year of the first diagnosis, whichever you remember better.

▼ (ANAM\_4\_6 == "Yes") AND (! (is\_empty(ANAM\_93\_other)))

Age: *enter your answer here*

Year: *enter your answer here*

[ANAM\_109] Are you currently in medical treatment because of {ANAM\_93\_other}?

▼ (ANAM\_4\_6 == "Yes") AND (! (is\_empty(ANAM\_93\_other)))

Yes

No

## 9: Gastrointestinal or liver diseases

[ANAM\_110] When did a gastrointestinal or liver disease occur for the first time?

Please indicate your age at the time of the first diagnosis or the year of the first diagnosis, whichever you remember better.

▼ ANAM\_4\_7 == "Yes"

Age: *enter your answer here*

Year: *enter your answer here*

[ANAM\_111] Which gastrointestinal or liver disease is / was it?

*enter your answer here*

[ANAM\_112] Are you currently in medical treatment because of {ANAM\_111}?

Yes

No

## 10: Skin diseases

[ANAM\_113] When did a skin disease occur for the first time?

Please indicate your age at the time of the first diagnosis or the year of the first diagnosis, whichever you remember better.

▼ ANAM\_4\_8 == "Yes"

Age: *enter your answer here*

Year: *enter your answer here*

[ANAM\_114] Which skin disease is / was it?

*enter your answer here*

[ANAM\_115] Are you currently in medical treatment because of {ANAM\_114}?

Yes

No

## 11: Kidney diseases

[ANAM\_116] When did a kidney disease occur for the first time?

Please indicate your age at the time of the first diagnosis or the year of the first diagnosis, whichever you remember better.

▼ ANAM\_4\_9 == "Yes"

Age: *enter your answer here*

Year: *enter your answer here*

[ANAM\_117] Which kidney disease is / was it?

*enter your answer here*

[ANAM\_118] Are you currently in medical treatment because of {ANAM\_117}?

Yes

No

[ANAM\_119] Have you ever been treated with a dialysis (blood wash)?

Yes

No



## 12: Neurological diseases

[ANAM\_120] When did a neurological disease occur for the first time?

Please indicate your age at the time of the first diagnosis or the year of the first diagnosis, whichever you remember better.

▼ ANAM\_4\_10 == "Yes"

Age: *enter your answer here*

Year: *enter your answer here*

[ANAM\_121] Which neurological disease is / was it?

*enter your answer here*

[ANAM\_122] Are you currently in medical treatment because of {ANAM\_121}?

Yes

No

### 13: Psychiatric diseases

[ANAM\_123] When did a psychiatric disease occur for the first time?

Please indicate your age at the time of the first diagnosis or the year of the first diagnosis, whichever you remember better.

▼ ANAM\_4\_11 == "Yes"

Age: *enter your answer here*

Year: *enter your answer here*

[ANAM\_124] Which psychiatric disease is / was it?

*enter your answer here*

[ANAM\_125] Are you currently in medical treatment because of {ANAM\_124}?

Yes

No

## 14: Other diseases

[ANAM\_126] When did {ANAM\_4\_12\_text} occur for the first time?

Please indicate your age at the time of the first diagnosis or the year of the first diagnosis, whichever you remember better.

▼ ANAM\_4\_12 == "Yes"

Age: *enter your answer here*

Year: *enter your answer here*

[ANAM\_127] Are you currently in medical treatment because of {ANAM\_4\_12\_text}?

Yes

No

## 15: Seeking medical advice

[Arzt\_1] How often have you visited a doctor (except for dentists) in the last 12 months?

In answering this question, please refer to all doctors (except for dentists) who you have visited in the past 12 months, e.g. general practitioner, ophthalmologist, dermatologist or other specialists.

- In the last 12 months I have not visited a doctor.
- Number of visits:

[Arzt\_2] For what reason(s) did you visit a doctor in the last 12 months?

(multiple choice possible)

▼ Arzt\_1 == Yes"

- Acute disease, e.g. flu, diarrhea, accident
- Disease which is not an infection, e.g. sugar disease, hypertension, allergies
- Feeling ill, e.g. general malaise, sleep diseases
- Consultation
- Visit without medical consultation, e.g. prescription, irradiation
- Preventive examination, vaccination

[Arzt\_3] Do you have a general practitioner?

- Yes
- No

## 16: Smoking

[smoke\_1] Have you ever smoked regularly in your life over a period of more than 6 months?

Under “regularly” we understand: 1 cigarette per day or at least 5 cigarettes per week or at least 1 pack of cigarettes per month or 1 cigarillo per day or at least 5 per week or 2 cigars per week or 2 pipes per week.

- Yes
- No

[smoke\_2] When did you start regular smoking?

Please specify either your age or the year in which you started smoking, depending on what you remember better.

▼ smoke\_1 == “Yes”

Age: *enter your answer here*

Year: *enter your answer here*

[smoke\_3] Do you smoke at the moment, though occasionally?

▼ (smoke\_1 == “Yes”

- Yes, every day
- Yes, occasionally
- No

How much do you currently smoke?

Please specify the number per day / per week or grams per week depending on what you can estimate better.

[smoke\_4\_1] Filter cigarettes (ready to use)

▼ (smoke\_1 == “Yes”) AND (smoke\_3 == “Yes”)

Number per day: *enter your answer here*

Number per week: *enter your answer here*

[smoke\_4\_2] Filterless cigarettes (ready to use)

▼ (smoke\_1 == “Yes”) AND (smoke\_3 == “Yes”)

Number per day: *enter your answer here*

Number per week: *enter your answer here*

[smoke\_4\_3] Cigars, cigarillos, stumps

▼ (smoke\_1 == “Yes”) AND (smoke\_3 == “Yes”)

Number per day: *enter your answer here*

Number per week: *enter your answer here*

[smoke\_4\_4] Self-turned cigarettes

▼ (smoke\_1 == “Yes”) AND (smoke\_3 == “Yes”)

Grams per week: *enter your answer here*

Number per day: *enter your answer here*

[smoke\_4\_5] Pipes

▼ (smoke\_1 == “Yes”) AND (smoke\_3 == “Yes”)

Grams per week: *enter your answer here*

Number per day: *enter your answer here*

[smoke\_5] When did you stop smoking?

Please specify either your age or the year in which you stopped smoking, depending on what you remember better.

▼ (smoke\_1 == “Yes”) AND (smoke\_3 == “No”)

Age: *enter your answer here*

Year: *enter your answer here*

How much have you usually smoked in the past?

Please enter the number per day / per week or per week depending on what you can estimate.

[smoke\_6\_1] Filter cigarettes (ready to use)

▼ (smoke\_1 == "Yes") AND (smoke\_3 == "No")

Number per day: *enter your answer here*

Number per week: *enter your answer here*

[smoke\_6\_2] Filterless cigarettes (ready to use)

▼ (smoke\_1 == "Yes") AND (smoke\_3 == "No")

Number per day: *enter your answer here*

Number per week: *enter your answer here*

[smoke\_6\_3] Cigars, cigarillos, stumps

▼ (smoke\_1 == "Yes") AND (smoke\_3 == "No")

Number per day: *enter your answer here*

Number per week: *enter your answer here*

[smoke\_6\_4] Self-turned cigarettes

▼ (smoke\_1 == "Yes") AND (smoke\_3 == "No")

Grams per week: *enter your answer here*

Number per day: *enter your answer here*

[smoke\_6\_5] Pipes

▼ (smoke\_1 == "Yes") AND (smoke\_3 == "No")

Grams per week: *enter your answer here*

Number per day: *enter your answer here*

## 17: Alcohol consumption

[AUDIT\_1] How often do you drink alcohol?

- Never
- About once a month
- Two to four times a month
- Two to three times a week
- Four times or more per week

[AUDIT\_2] If you drink alcohol in one day, how many alcoholic drinks do you typically drink?

- 1 or 2 glasses
- 3 or 4 glasses
- 5 or 6 glasses
- 7 or 8 glasses
- 10 glasses or more

[AUDIT\_3] How often have you drunk more than 6 alcoholic beverages in the last 12 months?

- Never
- Less than 1 time per month
- Once a month
- Once a week
- Daily or almost daily

## 18: Sexual contacts

In the following, we are now asking for sexual contacts, that is, those with whom sexual intercourse has taken place. There are diseases that can be transmitted via sexual intercourse. The transmission takes place only sometimes and not everyone is affected. We ask these questions to understand the possible spread of these pathogens. This is not about whether someone was or is ill. It is also very important to get answers from people who don't have sexually transmitted diseases. Again, we would like to stress at this point that your answers will remain anonymous and no individual responses will be visible. The answer to the questions is, of course, voluntary.

[keine\_Antwort] If you don't want to complete this section of the survey, please let us know. In the course of the survey you have also the option "I don't want to answer".

I don't want to complete this section of the survey.

[sex1] How old were you when you first had sexual intercourse?

If you are not sure how old you were, please give an estimate.

▼ keine\_Antwort\_1 != "Yes"

I don't want to answer.

I have not had any sexual contact yet.

My age in years was then:

[sex2] Do you currently have a sexual partnership?

Sexual partnership means: a partnership in which sexual intercourse takes place.

▼ (keine\_Antwort\_1 != "Yes") & (sex1 != "I have not had any sexual contact yet.")

Yes

No

I don't want to answer.

[sex2\_dauer] Do you think that this sexual partnership will continue in 3 months?

▼ sex2 == "Yes"

Yes

No

Don't know

I don't want to answer.



## 19: Contacts with persons of the opposite sex

[sex3] If you think about your whole life, with how many people of the opposite sex have you had sexual intercourse so far?

*enter your answer here*

I don't want to answer.

[sex4] If you think about the last 12 months (since June 1, 2014), with how many people of the opposite sex did you have sexual intercourse?

▼ sex3\_1\_anz >= "1"

*enter your answer here*

I don't want to answer.

[sex4neu] How many of these {sex4\_1\_anz} people you have had sexual intercourse with over the past 12 months have been new partners with whom you have had sexual intercourse for the first time?

▼ sex4\_1\_anz >= "1"

*enter your answer here*

I don't want to answer.

## 20: Contacts with persons of the same sex

[sex5] If you think about your entire life, with how many people of the same sex have you had sexual intercourse so far?

*enter your answer here*

I don't want to answer.

[sex6] If you think about the last 12 months (since June 1, 2014), with how many people of the same sex did you have sexual intercourse?

▼ sex5\_1\_anz >= "1"

*enter your answer here*

I don't want to answer.

[sex6neu] How many of these {sex6\_1\_anz} people you have had sexual intercourse with over the last 12 months have been new partners with whom you had sexual intercourse for the first time?

▼ sex6\_1\_anz >= "1"

*enter your answer here*

I don't want to answer.

## 21: Age of contact persons

[sex7\_99] How old were the last partners with whom you had sexual intercourse?

Please refer only to your sexual partners during the last 12 months (since June 1, 2014).

Please also provide details of how often you / your partner used condoms when having sexual intercourse.

I don't want to answer.

If you don't know the exact age, please give your best estimate of age.

|     | Age | Gender                   |                          | Frequency of condom use                  |                                |                          |
|-----|-----|--------------------------|--------------------------|------------------------------------------|--------------------------------|--------------------------|
|     |     | Male                     | Female                   | Always<br>(for every sexual intercourse) | Sometimes yes,<br>sometimes no | Never                    |
| [1] |     | <input type="checkbox"/> | <input type="checkbox"/> | <input type="checkbox"/>                 | <input type="checkbox"/>       | <input type="checkbox"/> |
| [2] |     | <input type="checkbox"/> | <input type="checkbox"/> | <input type="checkbox"/>                 | <input type="checkbox"/>       | <input type="checkbox"/> |
| [3] |     | <input type="checkbox"/> | <input type="checkbox"/> | <input type="checkbox"/>                 | <input type="checkbox"/>       | <input type="checkbox"/> |

## 22: Contacts of the partner

{if (sex2 == "Yes", "The following questions pertain to your current partner(s). ", "The following questions refer to your last sexual partnership. ")}

[sex9] Did your partner have sexual intercourse with other people in the last 12 months (since June 1, 2014)?

- Yes (I know exactly)
- Yes (I suppose, but I don't know)
- No (I know exactly)
- I don't know it
- I don't want to answer.

[sex9\_anz] Do you know how many sexual partners your partner has had in the last 12 months (excluding yourself)?

▼ sex9 == "Yes

- No, I don't know that.
- I don't want to answer.
- Yes, number of partners:

[sex10] Do you know how many sexual partners your partner has had in your life (excluding yourself)?

- No, I don't know that.
- I don't want to answer.
- Yes, number of partners:

[sex11] How often did your partner use a condom in the past partnerships in his / her life?

- Always (for every sexual intercourse)
- Sometimes yes, sometimes no
- Never
- Do not know
- I do not want to answer.

## 23: Submit questionnaire

[ON11\_remark] Thank you for completing the survey!

If you would like to tell us something about this survey, you can do it here:

*enter your answer here*

## L: Ebola risk perception (follow-up)

In November 2014, we asked you what you think about the Ebola outbreak in West Africa and whether / how Ebola affects your everyday life. We would now like to examine whether these aspects have changed over time. That is why we ask you a few questions from November, some of them in changed form.

### 1: Ebola virus disease

[angst1\_2015] Are you currently worried about Ebola?

- Yes
- No

[angst\_reason\_2015] Why are you worried?

(multiple choice possible)

▼ angst1\_2015 == "Yes"

- Worried to get infected with Ebola yourself
- Worried that a family members gets infected with Ebola
- Worried that the outbreak could turn into a pandemic
- Worried that many people die in the world
- Other reason, namely:

[angst2\_2015] How much are you worried about Ebola?

Please mark a number from 1="not much" to 5="very much"

▼ angst1\_2015 == "Yes"

- | Not much                 |                          | Very much                |                          |                          |
|--------------------------|--------------------------|--------------------------|--------------------------|--------------------------|
| 1                        | 2                        | 3                        | 4                        | 5                        |
| <input type="checkbox"/> | <input type="checkbox"/> | <input type="checkbox"/> | <input type="checkbox"/> | <input type="checkbox"/> |

[angst1\_2014] At the time of the last survey (November 2014): Were you worried about Ebola?

- Yes
- No

[angst\_reason\_2014] Why were you worried at that time?

(multiple choice possible)

▼ angst1\_2014 == "Yes"

- Worried to get infected with Ebola yourself
- Worried that a family members gets infected with Ebola
- Worried that the outbreak could turn into a pandemic
- Worried that many people die in the world
- Other reason, namely:

## 2: Ebola virus disease (continued)

[wissen1\_2015] How do you rate your current personal knowledge about Ebola virus disease?

- Very poor
- Poor
- Moderate
- Good
- Very good

[wissen2\_2015] How do you rate the current information that you get from the media about the situation in African countries affected by Ebola?

- Very poor
- Poor
- Moderate
- Good
- Very good

### 3: Probability of acquiring Ebola

[knowledge\_2015] How can Ebola be transmitted?

|                                                                                                                               | Yes                      | No                       | Don't know               |
|-------------------------------------------------------------------------------------------------------------------------------|--------------------------|--------------------------|--------------------------|
| By direct contact with bodily fluids of infected persons, either dead or living                                               | <input type="checkbox"/> | <input type="checkbox"/> | <input type="checkbox"/> |
| By direct contact with infected, but asymptomatic persons                                                                     | <input type="checkbox"/> | <input type="checkbox"/> | <input type="checkbox"/> |
| Through air, if infected people cough or sneeze                                                                               | <input type="checkbox"/> | <input type="checkbox"/> | <input type="checkbox"/> |
| Through material which has been heavily contaminated with bodily fluids of dead or living infected persons                    | <input type="checkbox"/> | <input type="checkbox"/> | <input type="checkbox"/> |
| Through drinking water                                                                                                        | <input type="checkbox"/> | <input type="checkbox"/> | <input type="checkbox"/> |
| Through food produced in Germany                                                                                              | <input type="checkbox"/> | <input type="checkbox"/> | <input type="checkbox"/> |
| By casual contact with someone already sick, such as sitting next to the person (without any direct contact of bodily fluids) | <input type="checkbox"/> | <input type="checkbox"/> | <input type="checkbox"/> |
| By wild animals in Africa (monkeys, bats)                                                                                     | <input type="checkbox"/> | <input type="checkbox"/> | <input type="checkbox"/> |
| By wild animals in Germany (rats, foxes)                                                                                      | <input type="checkbox"/> | <input type="checkbox"/> | <input type="checkbox"/> |
| By insects in Africa (mosquitoes, tsetse flies)                                                                               | <input type="checkbox"/> | <input type="checkbox"/> | <input type="checkbox"/> |
| By insects in Germany (midges)                                                                                                | <input type="checkbox"/> | <input type="checkbox"/> | <input type="checkbox"/> |



#### 4: Probability of acquiring Ebola (continued)

[risk\_2015] If you think of the recent worldwide situation about Ebola: Do you think that you have a personal risk of acquiring Ebola...

|                                                                | Highly likely            | Quite likely             | Quite unlikely           | Highly unlikely          | Does not apply           |
|----------------------------------------------------------------|--------------------------|--------------------------|--------------------------|--------------------------|--------------------------|
| ... at work?                                                   | <input type="checkbox"/> | <input type="checkbox"/> | <input type="checkbox"/> | <input type="checkbox"/> | <input type="checkbox"/> |
| ... in public transport?                                       | <input type="checkbox"/> | <input type="checkbox"/> | <input type="checkbox"/> | <input type="checkbox"/> | <input type="checkbox"/> |
| ... in public places (school, childcare ...) or public events? | <input type="checkbox"/> | <input type="checkbox"/> | <input type="checkbox"/> | <input type="checkbox"/> | <input type="checkbox"/> |
| ... at an airport in Germany?                                  | <input type="checkbox"/> | <input type="checkbox"/> | <input type="checkbox"/> | <input type="checkbox"/> | <input type="checkbox"/> |
| ... as a patient in a German hospital?                         | <input type="checkbox"/> | <input type="checkbox"/> | <input type="checkbox"/> | <input type="checkbox"/> | <input type="checkbox"/> |
| ... at a doctor's office in Germany?                           | <input type="checkbox"/> | <input type="checkbox"/> | <input type="checkbox"/> | <input type="checkbox"/> | <input type="checkbox"/> |
| ... during a travel to affected countries?                     | <input type="checkbox"/> | <input type="checkbox"/> | <input type="checkbox"/> | <input type="checkbox"/> | <input type="checkbox"/> |
| ... by food imported from Western African countries?           | <input type="checkbox"/> | <input type="checkbox"/> | <input type="checkbox"/> | <input type="checkbox"/> | <input type="checkbox"/> |
| ... by other products originating in West Africa?              | <input type="checkbox"/> | <input type="checkbox"/> | <input type="checkbox"/> | <input type="checkbox"/> | <input type="checkbox"/> |

## 5: Probability of acquiring Ebola (continued)

[pandemie\_2015] Are you worried that...

|                                                                                                                                             | Highly likely            | Quite likely             | Quite unlikely           | Highly unlikely          |
|---------------------------------------------------------------------------------------------------------------------------------------------|--------------------------|--------------------------|--------------------------|--------------------------|
| ... in the next three months people might arrive in Germany who are identified as infected persons after their entry?                       | <input type="checkbox"/> | <input type="checkbox"/> | <input type="checkbox"/> | <input type="checkbox"/> |
| ... individual persons might be infected with the Ebola virus in Germany during the next six months?                                        | <input type="checkbox"/> | <input type="checkbox"/> | <input type="checkbox"/> | <input type="checkbox"/> |
| ... in the next six months Ebola could spread in the general population of Germany similar to how it is spreading currently in West Africa? | <input type="checkbox"/> | <input type="checkbox"/> | <input type="checkbox"/> | <input type="checkbox"/> |

## 6: Personal behavior and prevention measures

[travel1\_2015] Consider the following scenario: You have won a trip to Africa. You like Africa as a destination and you are happy about winning.

If you are thinking of the current global situation regarding Ebola: Would you take this trip if the trip would go to one of the affected areas in West Africa?

- Yes
- No
- Don't know

[travel2\_2015] Consider the following scenario: You have won a trip to Africa. You like Africa as a destination and you are happy about winning.

If you are thinking of the current global situation regarding Ebola: Would you take this trip if the trip would go to non-affected parts of Africa?

- Yes
- No
- Don't know

[travel\_result] Between March 2014 and today: Did you actually cancel a journey to Africa because of Ebola?

- Yes, I cancelled a journey to Africa due to the Ebola outbreak.
- In the period from March 2014 until today, I did not plan / undertake any trip to Africa at all.
- I have made the trip to Africa as planned.

[travel\_destination] In which African country {if(travel\_result == "made the trip", "did you travel", "did you plan to travel")}?  
▼ travel\_result == "cancelled" | travel\_result == "made the trip"

*enter your answer here*

## 7: Personal behavior and prevention measures (continued)

[action\_hospital\_2015] Would you change your behavior if an Ebola patient was evacuated from Africa and brought to Germany for treatment in a near-by hospital?

|                                                                      | Yes                      | Rather yes               | Rather no                | No                       |
|----------------------------------------------------------------------|--------------------------|--------------------------|--------------------------|--------------------------|
| I would avoid public events and crowded places.                      | <input type="checkbox"/> | <input type="checkbox"/> | <input type="checkbox"/> | <input type="checkbox"/> |
| I would avoid using public transport.                                | <input type="checkbox"/> | <input type="checkbox"/> | <input type="checkbox"/> | <input type="checkbox"/> |
| I would avoid physical contact with other people.                    | <input type="checkbox"/> | <input type="checkbox"/> | <input type="checkbox"/> | <input type="checkbox"/> |
| I would increase my hygiene behavior (e.g. wash my hands more often) | <input type="checkbox"/> | <input type="checkbox"/> | <input type="checkbox"/> | <input type="checkbox"/> |
| I would wear a face mask outside of my home.                         | <input type="checkbox"/> | <input type="checkbox"/> | <input type="checkbox"/> | <input type="checkbox"/> |
| I would not want to be admitted to the same hospital.                | <input type="checkbox"/> | <input type="checkbox"/> | <input type="checkbox"/> | <input type="checkbox"/> |
| I would not visit friends admitted to the same hospital.             | <input type="checkbox"/> | <input type="checkbox"/> | <input type="checkbox"/> | <input type="checkbox"/> |

## 8: Personal behavior and prevention measures (continued)

[measure\_2015] Should the following measures be introduced to prevent the spread of Ebola to Europe?

|                                                                                                                                                                     | Not on any account       | Not encouraged           | Encouraged               | Yes, absolutely          |
|---------------------------------------------------------------------------------------------------------------------------------------------------------------------|--------------------------|--------------------------|--------------------------|--------------------------|
| Provide information on Ebola to all travelers coming from affected areas and provide advice in case one develops signs and symptoms                                 | <input type="checkbox"/> | <input type="checkbox"/> | <input type="checkbox"/> | <input type="checkbox"/> |
| Get personal information of all travelers coming from affected areas and control their health for three weeks long upon arrival                                     | <input type="checkbox"/> | <input type="checkbox"/> | <input type="checkbox"/> | <input type="checkbox"/> |
| Forbid return transport for Germans who get infected during aid missions in West Africa                                                                             | <input type="checkbox"/> | <input type="checkbox"/> | <input type="checkbox"/> | <input type="checkbox"/> |
| Forbid bringing Ebola patients for treatment to Germany                                                                                                             | <input type="checkbox"/> | <input type="checkbox"/> | <input type="checkbox"/> | <input type="checkbox"/> |
| Measure temperature for all travelers coming from affected countries upon arrival at Europe with subsequent quarantine for those with high temperature              | <input type="checkbox"/> | <input type="checkbox"/> | <input type="checkbox"/> | <input type="checkbox"/> |
| Measure temperature for all travelers coming from affected countries when they are about to leave Africa with subsequent quarantine for those with high temperature | <input type="checkbox"/> | <input type="checkbox"/> | <input type="checkbox"/> | <input type="checkbox"/> |
| Three weeks of mandatory quarantine for all volunteers returning from aid missions in West Africa                                                                   | <input type="checkbox"/> | <input type="checkbox"/> | <input type="checkbox"/> | <input type="checkbox"/> |
| Entry restrictions for people from affected countries                                                                                                               | <input type="checkbox"/> | <input type="checkbox"/> | <input type="checkbox"/> | <input type="checkbox"/> |
| Forbid travelling from Germany to affected countries in Africa                                                                                                      | <input type="checkbox"/> | <input type="checkbox"/> | <input type="checkbox"/> | <input type="checkbox"/> |
| Compulsory vaccination against Ebola for all inhabitants of affected countries as soon as a vaccine is available                                                    | <input type="checkbox"/> | <input type="checkbox"/> | <input type="checkbox"/> | <input type="checkbox"/> |

## 9: Personal commitment

[help1\_2015] Suppose there was another major outbreak of an infectious disease in Africa: Would you go there to help?

- Yes
- Unlikely
- Likely
- No
- Don't know

[help1\_1\_2015] Do you think that your experience/knowledge would be helpful to do that?

- Yes
- Unlikely
- Likely
- No
- Don't know

[help1\_2\_2015] Would your personal situation allow you to go and help in Africa?  
(multiple choice possible)

- Yes
- No, I cannot go because of my family
- No, I cannot go because of my job
- Don't know
- Other (please specify):

[help2\_2015] What would be the main reason not to volunteer?

- I would be worried about getting infected.
- I think that the help would not be useful.
- I would be afraid to be overwhelmed by the situation on site.
- I would be worried that I might not return to Germany if I get infected.
- I would be worried about not being able to get back to Germany because of an entry restriction.
- I think every country should solve its problems by itself without depending on help from other countries.
- Other reason, namely:

[help3\_2015] Do you know someone who has helped in Africa during the Ebola outbreak?

- Yes
- No

## 10: Personal commitment (continued)

[money1\_2015] Would you be willing to donate for the fight against Ebola in Africa?

- Yes             Unlikely  
 Likely         No  
 Don't know

[money2\_2015] Which sum would you donate?

If you have already donated: How much have you donated?

▼ money1\_2015 != "No"

- Up to 10 Euros  
 11 to 20 Euros  
 21 to 50 Euros  
 51 to 100 Euros  
 101 to 200 Euros  
 More than 200 Euros

[money3\_2015] Would you support a nonrecurring, compulsory, and income-related payment for the fight against Ebola in Africa?

- Yes             Unlikely  
 Likely         No  
 Don't know

[money4\_2015] Which sum would you pay for the cause?

Please enter as a percentage of your monthly net income.

▼ money3\_2015 != "No"

*enter your answer here*

## 11: Vaccination

[vaccination1\_2015] If a vaccine against Ebola existed, would you opt for the vaccination even if you do not plan to visit affected countries in West Africa and do not have contact with Ebola patients ever?

- Yes
- No
- Don't know

[vaccination2\_2015] Would you still do so if the vaccine was associated with occasional mild side effects?

▼ vaccination1\_2015 != "No"

- Yes
- No
- Don't know

[vaccination3\_2015] Would you still do so if the vaccine was associated with rare and severe side effects?

▼ vaccination1\_2015 != "No"

- Yes
- No
- Don't know

[vaccination4\_2015] Should there be a compulsory vaccination against Ebola for the medical staff in Germany?

- Yes
- No
- Don't know

[vaccination5\_2015] Should there be a compulsory vaccination against Ebola for the general population in Germany if the number of Ebola cases in Germany increased?

- Yes
- No
- Don't know



## 12: Activities about Ebola

[activity\_2015] Did you do something among the following list of actions in connection to Ebola?  
(multiple choice possible)

- Write a letter to the editor or a blog entry about Ebola in a paper or on the Internet
- Write a comment to an article in the Internet (e.g. Tagesschau.de, Spiegel online)
- Discussion in the circle of acquaintances
- Adhered to preventive measures at work
- Donations
- Participation in information events
- Organizing an information event
- Offer to participate in aid missions in Africa
- Offer to help in Germany

## M: Tick-borne infections (follow-up)

In July 2014 we interviewed you about ticks and tick infections. Here we could get interesting results. We would like to ask you more about this topic in order to be able to interpret them more precisely. You already know some of the questions from the first questionnaire on this topic. Nevertheless, please answer all questions in this questionnaire.

### 1: Fear

[ZE\_2\_1] Are you afraid of ticks?

Yes

No

[ZE\_2\_2] I am afraid...

▼ ZE\_2\_1 == "Yes"

|                                                                      | Applies                  | Rather applies           | Does rather not apply    | Does not apply           |
|----------------------------------------------------------------------|--------------------------|--------------------------|--------------------------|--------------------------|
| [1] ... to get infected with borreliosis.                            | <input type="checkbox"/> | <input type="checkbox"/> | <input type="checkbox"/> | <input type="checkbox"/> |
| [2] ... to get infected with early summer meningoencephalitis (TBE). | <input type="checkbox"/> | <input type="checkbox"/> | <input type="checkbox"/> | <input type="checkbox"/> |
| [3] ... of ticks (spiders) in general.                               | <input type="checkbox"/> | <input type="checkbox"/> | <input type="checkbox"/> | <input type="checkbox"/> |
| [4] ...to have to remove the tick.                                   | <input type="checkbox"/> | <input type="checkbox"/> | <input type="checkbox"/> | <input type="checkbox"/> |

## 2: Prevention – tick vaccination

[ZE\_2\_3] Have you ever received a tick vaccination?

- Yes
- No
- Don't know

[ZE\_2\_4] How many times have you been vaccinated against ticks in your life (1 injection corresponds to a vaccination)?

If you do not know the exact number, please provide an estimate.

▼ ZE\_2\_3 == "Yes"

*enter your answer here*

[ZE\_IM\_wann] When did you receive these tick vaccinations?

If you can not remember exactly what month you received this vaccination, please specify only the year. If possible, check your vaccination card.

▼ ZE\_2\_3 == "Yes"

- I do not know for all vaccinations and can not check it out.

|                  | Month | Year |
|------------------|-------|------|
| 1st vaccination  |       |      |
| 2nd vaccination  |       |      |
| 3rd vaccination  |       |      |
| 4th vaccination  |       |      |
| 5th vaccination  |       |      |
| 6th vaccination  |       |      |
| 7th vaccination  |       |      |
| 8th vaccination  |       |      |
| 9th vaccination  |       |      |
| 10th vaccination |       |      |

### 3: Prevention – why tick vaccination?

[ZE\_2\_6] Why did you opt for tick vaccination? (Please state the most important reason for the last vaccination.)

▼ ZE\_2\_3 == "Yes"

- Because I've traveled to a risk area.
- Because I was privately endangered at my place of residence to come into contact with ticks.
- Because I was professionally at risk of coming into contact with ticks.
- Another reason, namely:

[ZE\_2\_7] What risk area did you travel to?

▼ ZE\_2\_6 == "Yes"

*enter your answer here*

[ZE\_2\_8] How many times did you go there?

▼ ZE\_2\_6 == "Yes"

- Once
- Multiple times
- I have lived there for a while.

[ZE\_2\_9] Where can / could you possibly come into contact with ticks?

▼ ZE\_2\_6 == "at risk of coming into contact with ticks"

- In Lower Saxony
- In a risk area
- In a non-risk area outside Lower Saxony

[ZE\_2\_10] In which area do / did you come into contact with ticks?

▼ ZE\_2\_9 == "risk area"

*enter your answer here*

[ZE\_2\_11] How did you decide to opt for tick vaccination? (Please state the most important reason.)

▼ ZE\_2\_3 == "Yes"

- Because my physician / employer has recommended to me the vaccination.
- Because my family / friends / acquaintances have recommended to me the vaccination.
- Because I have informed myself.
- Other:

## 4: Tick bites

[ZE\_2\_12] Have you been bitten by a tick at least once in the last 6 months?

- Yes
- No

[ZE\_2\_13] In which country were you bitten?

(multiple choice possible)

▼ ZE\_2\_12 == "Yes"

- In Germany
- Abroad

[ZE\_2\_13DE]

(multiple choice possible)

▼ ZE\_2\_13 == "Germany"

- Baden-Württemberg
- Bavaria
- Berlin
- Brandenburg
- Bremen
- Hamburg
- Hesse
- Mecklenburg-Vorpommern
- Lower Saxony
- North Rhine-Westphalia
- Rhineland-Palatinate
- Saarland
- Saxony
- Saxony-Anhalt
- Schleswig-Holstein
- Thuringia

[ZE\_2\_13AUS]

(multiple choice possible)

▼ ZE\_2\_13 == "Abroad"

- Austria
- Poland
- Czech Republic
- Switzerland
- Baltic countries
- Other country:

[ZE\_2\_14] How did you remove the tick? (If you have been bitten more than once, please refer to the last time you were bitten.)

▼ ZE\_2\_12 == "Yes"

- I myself removed the tick (within 1 hour) after the discovery / had it removed by a person (not medically trained).
- I myself removed the tick, but not immediately (more than an hour after the discovery) / had it removed by a person (not medically trained).
- I visited a doctor to have the tick removed.

## 5: Seeking medical advice

[ZE\_2\_15] Have you ever seen a doctor because you were bitten by a tick or suspected a tick bite?

Yes

No

[ZE\_2\_16] How often has it happened so far that you have visited a doctor because you were bitten by a tick or suspected a tick bite?

▼ ZE\_2\_15 == "Yes"

*enter your answer here*

## 6: Last time doctor

[ZE\_2\_17] Please remember the last time that you have visited a doctor because you were bitten by a tick or suspected a tick bite: What was the main reason for visiting the doctor?

▼ ZE\_2\_15 == "Yes"

- I wanted to have the tick removed.
- I was unsure about having the tick properly removed.
- I was afraid of being infected with borreliosis.
- I was afraid of being infected with early summer meningoencephalitis (TBE).
- I felt ill without being able to say exactly why.
- Another reason, namely:

[ZE\_2\_18] Were there other reasons to visit the doctor, besides the above mentioned reason?  
(multiple choice possible)

▼ ZE\_2\_15 == "Yes"

- No, there were no other reasons.
- I wanted to have the tick removed.
- I was unsure about having the tick properly removed.
- I was afraid of being infected with borreliosis.
- I was afraid of being infected with early summer meningoencephalitis (TBE).
- I felt ill without being able to say exactly why.

## 7: Suspicion of borreliosis

[ZE\_2\_19] Did you have any symptoms of the disease that let you suspect to be infected with borreliosis?

▼ (ZE\_2\_17 == "I was afraid of being infected with borreliosis.") OR (ZE\_2\_18 == "I was afraid of being infected with borreliosis.")

- Yes
- No

[ZE\_2\_20] What were the symptoms?

(multiple choice possible)

▼ ZE\_2\_19 == "Yes"

- Erythema migrans: redness of the skin around the puncture site that has migrated over time
- Fever
- Fatigue
- Headache
- Swollen lymph nodes
- Burning pain
- Paralysis
- Numbness on the skin
- Visual or hearing impairment
- Arrhythmia
- Joint pain
- Other:

[ZE\_2\_21] Has your suspicion of borreliosis been confirmed by a doctor?

▼ (ZE\_2\_17 == "I was afraid of being infected with borreliosis.") OR (ZE\_2\_18 == "I was afraid of being infected with borreliosis.")

- Yes
- No



## 8: Diagnosis of borreliosis

In the previous questions, we asked if had a suspicion of borreliosis. In the following questions, we are concerned with the question of whether borreliosis has ever been diagnosed and how this diagnosis came about. The questions are therefore similar to the previous questions. Please answer the following questions anyway.

[ZE\_2\_22] Have you ever been diagnosed with borreliosis?

- Yes
- No

[ZE\_2\_23] When was borreliosis diagnosed?

▼ ZE\_2\_22 == "Yes"

- Immediately after a tick bite
- Within 4 weeks after ticking
- After more than 4 weeks after the tick bite
- I could not remember the tick bite.

[ZE\_2\_24] What symptoms have you had in relation to the diagnosed borreliosis?

(multiple choice possible)

▼ ZE\_2\_22 == "Yes"

- Erythema migrans: redness of the skin around the puncture site that has migrated over time
- Fever
- Fatigue
- Headache
- Swollen lymph nodes
- Burning pain
- Paralysis
- Numbness on the skin
- Visual or hearing impairment
- Arrhythmia
- Joint pain
- Other:

[ZE\_2\_25] Has treatment of borreliosis been performed?

▼ ZE\_2\_22 == "Yes"

- Yes, I got an antibiotic for 7-14 days.
- Yes, I have had an antibiotic for more than four weeks.
- No, I have not received any antibiotics.

## 9: Suspicion of TBE

[ZE\_2\_26] Did you have any symptoms of the disease that let you suspect to be infected with TBE?

▼ (ZE\_2\_17 == "I was afraid of being infected with early summer meningoencephalitis (TBE).") OR (ZE\_2\_18 == "I was afraid of being infected with early summer meningoencephalitis (TBE).")

- Yes
- No

[ZE\_2\_27] What were the symptoms?

(multiple choice possible)

▼ ZE\_2\_26 == "Yes"

- Erythema migrans: redness of the skin around the puncture site that has migrated over time
- Fever
- Fatigue
- Headache
- Swollen lymph nodes
- Burning pain
- Paralysis
- Numbness on the skin
- Visual or hearing impairment
- Arrhythmia
- Joint pain
- Other:

[ZE\_2\_28] Has your suspicion of TBE disease been confirmed by a doctor?

▼ (ZE\_2\_17 == "I was afraid of being infected with early summer meningoencephalitis (TBE).") OR (ZE\_2\_18 == "I was afraid of being infected with early summer meningoencephalitis (TBE).")

- Yes
- No

## 10: Other disease

[ZE\_2\_29] Which symptoms did you have?

(multiple choice possible)

▼ (ZE\_2\_17 == "I felt ill without being able to say exactly why.") OR (ZE\_2\_18 == "I felt ill without being able to say exactly why.")

- Erythema migrans: redness of the skin around the puncture site that has migrated over time
- Fever
- Fatigue
- Headache
- Swollen lymph nodes
- Burning pain
- Paralysis
- Numbness on the skin
- Visual or hearing impairment
- Arrhythmia
- Joint pain
- Other:

[ZE\_2\_30] Has the doctor diagnosed a disease?

▼ (ZE\_2\_17 == "5") OR (ZE\_2\_18\_5 == "Yes")

- No
- Yes (please specify):

## **N: Multi-drug resistant pathogens**

We would like to ask you about multiresistant germs, also known as "hospital germs". By this we mean pathogens which are resistant to various antibiotics. If these germs cause illness, the affected persons must be treated with special antibiotics.

### **1: Start**

[MRE1] Have you ever heard of multiresistant germs?

- Yes
- No

## 2: General

[MRE2] Where or by whom did you hear about multiresistant germs?

- |                                           |                                                           |
|-------------------------------------------|-----------------------------------------------------------|
| <input type="checkbox"/> TV               | <input type="checkbox"/> Brochures / information booklets |
| <input type="checkbox"/> Radio            | <input type="checkbox"/> Doctor                           |
| <input type="checkbox"/> Newspaper        | <input type="checkbox"/> Hospital staff                   |
| <input type="checkbox"/> Family / friends | <input type="checkbox"/> Colleagues                       |
| <input type="checkbox"/> Internet         | <input type="checkbox"/> Others, namely:                  |

[MRE3] Do you consider the topic of multiresistant germs as important?

- Very important
- Quite important
- Mediocre important
- Little important
- Not important

[MRE4] Have you ever been diagnosed with a multiresistant germ?

- Yes
- No
- Don't know

[MRE5] Do you know someone who has ever been diagnosed with a multidirectional germ?

- Yes
- No

[MRE6] Who do you know that has ever been diagnosed with a multidirectional germ?

(multiple choice possible)

- Family member
- Friend(s)
- Acquaintance(s)
- Someone else, namely:

[MRE7] Are you personally afraid of getting infected with multiresistant germs?

- Very
- Quite
- Mediocre
- Little
- Not

[MRE8] Are you afraid that a family member could get infected with a multiresistant germ?

- Very
- Quite
- Mediocre
- Little
- Not

[MRE9] Are you afraid of multiresistant germs as a whole social problem?

- Very
- Quite
- Mediocre
- Little
- Not

### 3: Opinion

In the following, we would like to gather your opinion on multiresistent germs.

[MRE10] One can only get infected with multiresistant germs in the hospital.

- Strongly agree
- Agree
- Disagree
- Strongly disagree
- Don't know

[MRE11] Multiresistant germs can not be treated.

- Strongly agree
- Agree
- Disagree
- Strongly disagree
- Don't know

[MRE12] If I stop taking an antibiotic immediately in case of improvement of the disease, I contribute to the prevention of multiresistant germs.

- Strongly agree
- Agree
- Disagree
- Strongly disagree
- Don't know

[MRE13] As long as I have a multiresistant germ only on the skin or mucous membrane, it is not dangerous for me.

- Strongly agree
- Agree
- Disagree
- Strongly disagree
- Don't know

## 4: Reasons

In the following, we would like to know what you think contributes to the spread of multiresistant germs.

[MRE14] What do you think is important for the spread of multiresistant germs?

|                                                 | Very important           | Quite important          | Mediocre important       | Little important         | Not important            | Don't know               |
|-------------------------------------------------|--------------------------|--------------------------|--------------------------|--------------------------|--------------------------|--------------------------|
| Improper use of antibiotics in the population   | <input type="checkbox"/> | <input type="checkbox"/> | <input type="checkbox"/> | <input type="checkbox"/> | <input type="checkbox"/> | <input type="checkbox"/> |
| Improper use of antibiotics in animal breeding  | <input type="checkbox"/> | <input type="checkbox"/> | <input type="checkbox"/> | <input type="checkbox"/> | <input type="checkbox"/> | <input type="checkbox"/> |
| Lack of hygiene in the medical field in general | <input type="checkbox"/> | <input type="checkbox"/> | <input type="checkbox"/> | <input type="checkbox"/> | <input type="checkbox"/> | <input type="checkbox"/> |
| Lack of hands-on hospital staff                 | <input type="checkbox"/> | <input type="checkbox"/> | <input type="checkbox"/> | <input type="checkbox"/> | <input type="checkbox"/> | <input type="checkbox"/> |
| Lack of hand hygiene in the population          | <input type="checkbox"/> | <input type="checkbox"/> | <input type="checkbox"/> | <input type="checkbox"/> | <input type="checkbox"/> | <input type="checkbox"/> |
| Lack of bedding in hospitals                    | <input type="checkbox"/> | <input type="checkbox"/> | <input type="checkbox"/> | <input type="checkbox"/> | <input type="checkbox"/> | <input type="checkbox"/> |
| Too little effective medication                 | <input type="checkbox"/> | <input type="checkbox"/> | <input type="checkbox"/> | <input type="checkbox"/> | <input type="checkbox"/> | <input type="checkbox"/> |
| Other cause, namely:                            | <input type="checkbox"/> | <input type="checkbox"/> | <input type="checkbox"/> | <input type="checkbox"/> | <input type="checkbox"/> | <input type="checkbox"/> |

## 5: Animal breeding

The following questions deal with the topic of animal breeding.

[MRE15] Do you or a person who lives in your household have professional care with farm animals, e.g. as a farmer, veterinarian or in meat processing?

- Yes, myself
- Yes, another person who lives in my household
- No

[MRE16] Politicians are responsible for reducing the use of antibiotics in animal breeding.

- Strongly agree
- Agree
- Disagree
- Strongly disagree
- Don't know

[MRE17] Farmers are responsible for reducing the use of antibiotics in animal breeding.

- Strongly agree
- Agree
- Disagree
- Strongly disagree
- Don't know

[MRE18] Consumers are responsible for reducing the use of antibiotics in animal breeding.

- Strongly agree
- Agree
- Disagree
- Strongly disagree
- Don't know

[MRE19] I am willing to spend more money on meat (comparable to the costs of organic products) if this leads to a reduced use of antibiotics.

- Strongly agree
- Agree
- Disagree
- Strongly disagree
- Don't know



## 6: Dissemination and responsibility

The following three questions address the issue of the spread of antibiotic resistance and responsibility in the health system.

[MRE20] Everyone is responsible for reducing the spread of multiresistant germs through the correct use of antibiotics.

- Strongly agree
- Agree
- Disagree
- Strongly disagree
- Don't know

[MRE21] Doctors and nursing staff are responsible for reducing the spread of multiresistant germs in the health system.

- Strongly agree
- Agree
- Disagree
- Strongly disagree
- Don't know

[MRE22] Politicians are responsible for reducing the spread of multiresistant germs in the health system.

- Strongly agree
- Agree
- Disagree
- Strongly disagree
- Don't know

Two case studies follow to conclude the questionnaire.

## 7: Case study 1

[MRE23] Your neighbor, a single senior, needs some help and you have been buying groceries for him for a few months. After a hospital stay, he tells you that he has been diagnosed with a hospital germ. How would you behave?

|                                                           | Strongly agree           | Agree                    | Disagree                 | Strongly disagree        |
|-----------------------------------------------------------|--------------------------|--------------------------|--------------------------|--------------------------|
| I behave exactly as before.                               | <input type="checkbox"/> | <input type="checkbox"/> | <input type="checkbox"/> | <input type="checkbox"/> |
| I wash my hands thoroughly after the visit.               | <input type="checkbox"/> | <input type="checkbox"/> | <input type="checkbox"/> | <input type="checkbox"/> |
| I disinfect my hands after the visit.                     | <input type="checkbox"/> | <input type="checkbox"/> | <input type="checkbox"/> | <input type="checkbox"/> |
| I change my clothes after visiting.                       | <input type="checkbox"/> | <input type="checkbox"/> | <input type="checkbox"/> | <input type="checkbox"/> |
| My children are no longer allowed to visit the neighbor.  | <input type="checkbox"/> | <input type="checkbox"/> | <input type="checkbox"/> | <input type="checkbox"/> |
| I now put the groceries in the hallway and avoid contact. | <input type="checkbox"/> | <input type="checkbox"/> | <input type="checkbox"/> | <input type="checkbox"/> |
| I now completely avoid the neighbors.                     | <input type="checkbox"/> | <input type="checkbox"/> | <input type="checkbox"/> | <input type="checkbox"/> |
| I'm afraid of being infected.                             | <input type="checkbox"/> | <input type="checkbox"/> | <input type="checkbox"/> | <input type="checkbox"/> |

## 8: Case study 2

[MRE24] Your work colleague, with whom you share the office and sometimes use the same items, tells you after a hospital stay that she has been infected with a hospital germ. How would you behave?

|                                                           | Strongly agree           | Agree                    | Disagree                 | Strongly disagree        |
|-----------------------------------------------------------|--------------------------|--------------------------|--------------------------|--------------------------|
| I behave exactly as before.                               | <input type="checkbox"/> | <input type="checkbox"/> | <input type="checkbox"/> | <input type="checkbox"/> |
| I often wash my hands.                                    | <input type="checkbox"/> | <input type="checkbox"/> | <input type="checkbox"/> | <input type="checkbox"/> |
| I often disinfect my hands.                               | <input type="checkbox"/> | <input type="checkbox"/> | <input type="checkbox"/> | <input type="checkbox"/> |
| I change my clothes after work.                           | <input type="checkbox"/> | <input type="checkbox"/> | <input type="checkbox"/> | <input type="checkbox"/> |
| I avoid body contact with her.                            | <input type="checkbox"/> | <input type="checkbox"/> | <input type="checkbox"/> | <input type="checkbox"/> |
| I avoid contact with materials that are touched together. | <input type="checkbox"/> | <input type="checkbox"/> | <input type="checkbox"/> | <input type="checkbox"/> |
| I ask my boss to move to another office / workspace.      | <input type="checkbox"/> | <input type="checkbox"/> | <input type="checkbox"/> | <input type="checkbox"/> |
| I'm afraid of being infected.                             | <input type="checkbox"/> | <input type="checkbox"/> | <input type="checkbox"/> | <input type="checkbox"/> |

## **O: Fair allocation of scarce medical resources**

In medicine, medical resources may not be available to all who need them. One example is organ transplantation. Even in the case of a flu pandemic, the vaccine can become scarce. The purpose of this questionnaire is to examine how scarce medical resources should be distributed. In the following questionnaire, there are no "right" or "wrong" answers. We are much more interested in your personal opinion about the distribution of medical resources.

### **1: Randomisation**

[FM\_Szenario]  
*random number (1 or 2)*

[FM\_Mortalitaet]  
*random number (0 or 1)*

[FM\_Info]  
*random number (0 or 1 or 2)*

[FM\_Fragestellung]  
*random number (0 or 1)*

## 2: Distribution of medical services

Please read the following statements and state the degree of your approval.

[FM\_Prinzip] In the distribution of medical resources (for example, therapy places, hospital beds, etc.), I feel it is fair, ...

|                                                                                                                       | Strongly disagree        |                          |                          | Strongly agree           |                          |
|-----------------------------------------------------------------------------------------------------------------------|--------------------------|--------------------------|--------------------------|--------------------------|--------------------------|
| ... if the resources are distributed according to the principle "first come, first served".                           | <input type="checkbox"/> | <input type="checkbox"/> | <input type="checkbox"/> | <input type="checkbox"/> | <input type="checkbox"/> |
| ... when younger people are preferred to older ones.                                                                  | <input type="checkbox"/> | <input type="checkbox"/> | <input type="checkbox"/> | <input type="checkbox"/> | <input type="checkbox"/> |
| ... if the costs for beauty treatments (to comply with beauty ideals) are taken over by the health insurance company. | <input type="checkbox"/> | <input type="checkbox"/> | <input type="checkbox"/> | <input type="checkbox"/> | <input type="checkbox"/> |
| ... when ill persons receive the treatments they need.                                                                | <input type="checkbox"/> | <input type="checkbox"/> | <input type="checkbox"/> | <input type="checkbox"/> | <input type="checkbox"/> |
| ... if the costs for accident-related beauty procedures are taken over by the health insurance company.               | <input type="checkbox"/> | <input type="checkbox"/> | <input type="checkbox"/> | <input type="checkbox"/> | <input type="checkbox"/> |
| ... if those receive the better services that pay more (for example, supplementary insurance or cost sharing).        | <input type="checkbox"/> | <input type="checkbox"/> | <input type="checkbox"/> | <input type="checkbox"/> | <input type="checkbox"/> |
| ... if all get the services they want to have.                                                                        | <input type="checkbox"/> | <input type="checkbox"/> | <input type="checkbox"/> | <input type="checkbox"/> | <input type="checkbox"/> |
| ... when people get less benefits that have an unhealthy lifestyle.                                                   | <input type="checkbox"/> | <input type="checkbox"/> | <input type="checkbox"/> | <input type="checkbox"/> | <input type="checkbox"/> |
| ... if the services are distributed according to the random principle.                                                | <input type="checkbox"/> | <input type="checkbox"/> | <input type="checkbox"/> | <input type="checkbox"/> | <input type="checkbox"/> |
| ... if the general health of the patient (i.e. the medical prognosis) is taken into account.                          | <input type="checkbox"/> | <input type="checkbox"/> | <input type="checkbox"/> | <input type="checkbox"/> | <input type="checkbox"/> |

### 3: Distribution problem (alternative 1)

#### ▼ FM\_Szenario == "1"

The following situation is invented. However, it shows similarities with processes in reality. In a city, a sexually transmitted disease has spread for 20 years. This disease leads to death within if (FM\_Mortalitaet == "1", "15 years", "5 years"). Currently every 50th inhabitant of the city is ill. The inhabitants differ in how often they change sexual partners and how often they have several sexual partners at the same time: approximately every 5th inhabitant belongs to the group with frequently changing partners or several partners at the same time. The remaining 80% of the population rarely change sexual partners. Younger residents of this city are changing their partners more often than older ones. A vaccine is now available for the first time. This protects reliably against contamination, already diseased persons are not cured by the vaccination however. The vaccine stock is currently not sufficient for all residents of the city. The vaccination can be distributed according to different criteria.

## 4: Distribution problem (alternative 1)

▼ (FM\_Szenario == "1") AND ((FM\_Info == "1") OR (FM\_Info == "2"))

Without vaccination if (FM\_Info == "1", "10,000", "20,000") inhabitants of the city would die of the disease. Researchers have estimated how much the number of deaths can be reduced depending on how the vaccination is distributed.

▼ FM\_Info == "1"

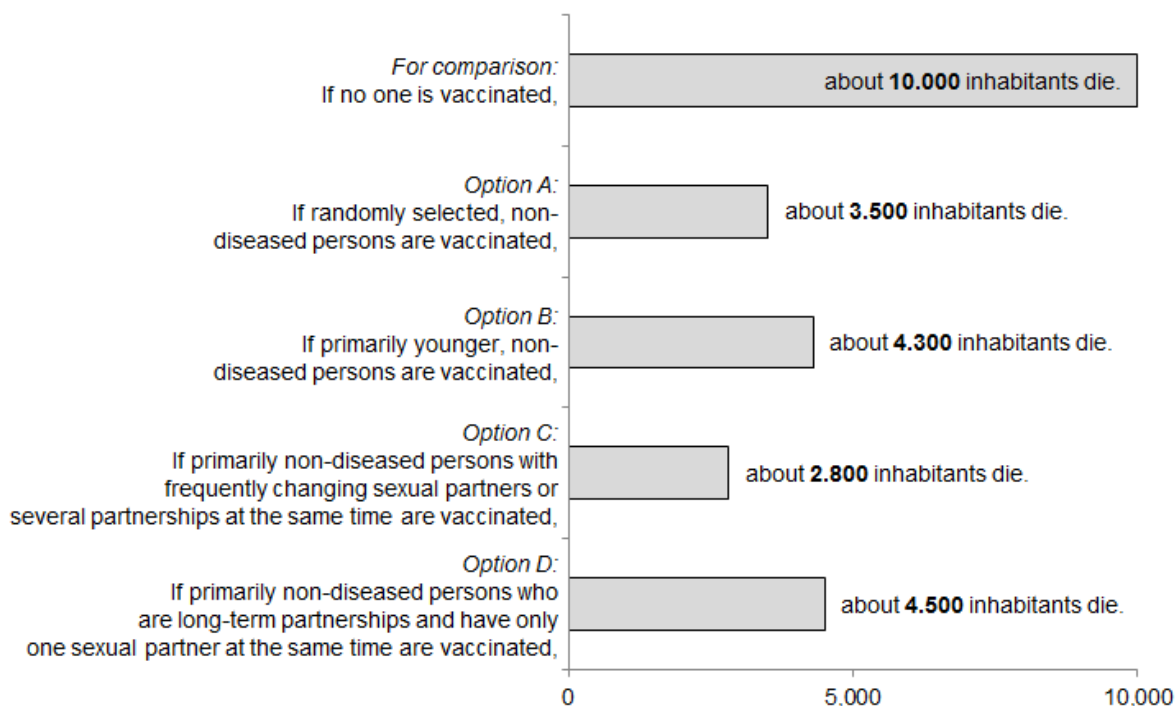

▼ FM\_Info == "2"

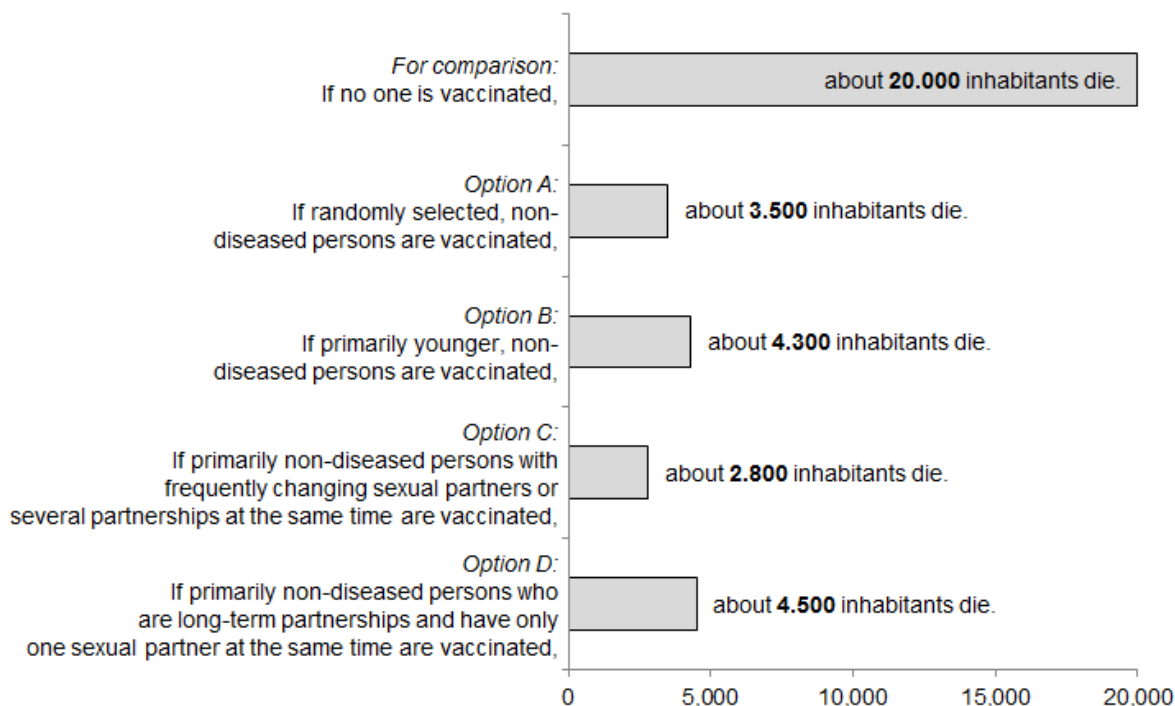

### 3: Distribution problem (alternative 2)

#### ▼ FM\_Szenario == "2"

The following situation is invented. However, it shows similarities with processes in reality. In a city, a sexually transmitted disease has spread for 20 years. This disease leads to death within if (FM\_Mortalitaet == "1", "15 years", "5 years"). Currently every 50th inhabitant of the city is ill. The inhabitants differ in how often they change sexual partners and how often they have several sexual partners at the same time: approximately every 5th inhabitant belongs to the group with frequently changing partners or several partners at the same time. The remaining 80% of the population rarely change sexual partners. Younger residents of this city are changing their partners more often than older ones. A treatment option is now available for the first time. A ill person who is treated can become as old as a healthy person. The treatment protects others from infection. The treatment is very expensive. Therefore, it is not possible to treat all persons who have been infected. The treatment can be distributed according to different criteria.



## 4: Distribution problem (alternative 2)

▼ (FM\_Szenario == "2") AND ((FM\_Info == "1") OR (FM\_Info == "2"))

Without treatment, if (FM\_Info == "1", "10,000", "20,000") residents of the city would die from the disease. Researchers have estimated how much the number of deaths can be reduced depending on how the treatment is distributed.

▼ FM\_Info == "1"

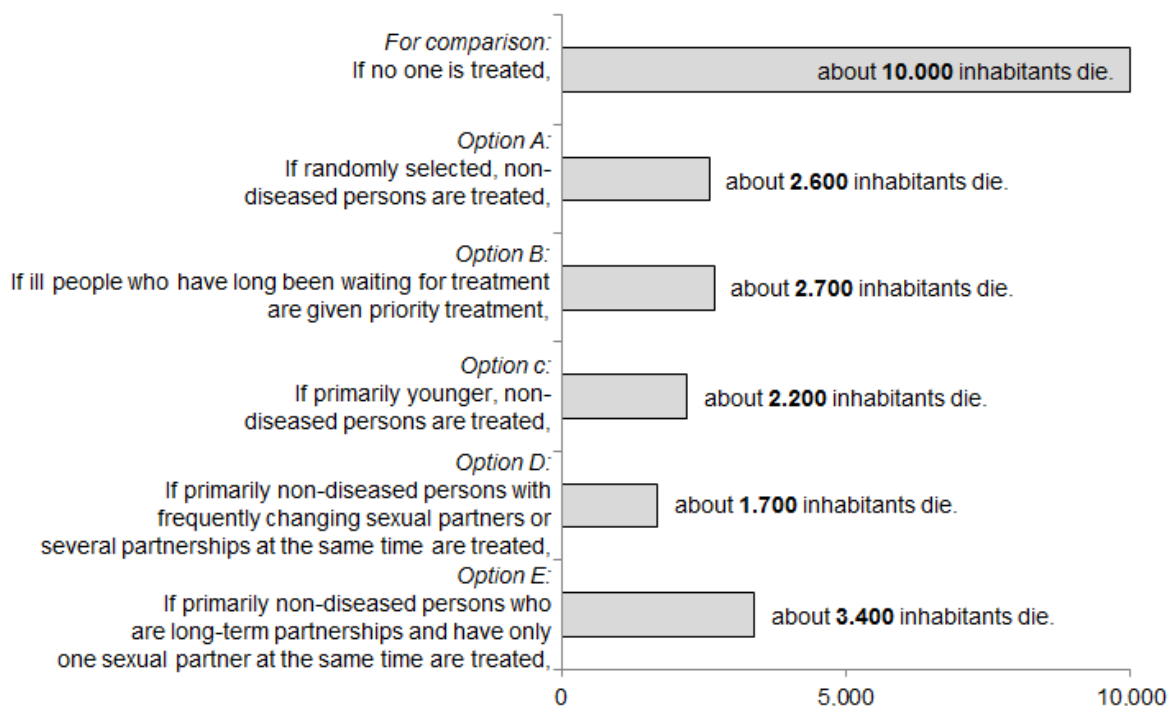

▼ FM\_Info == "2"

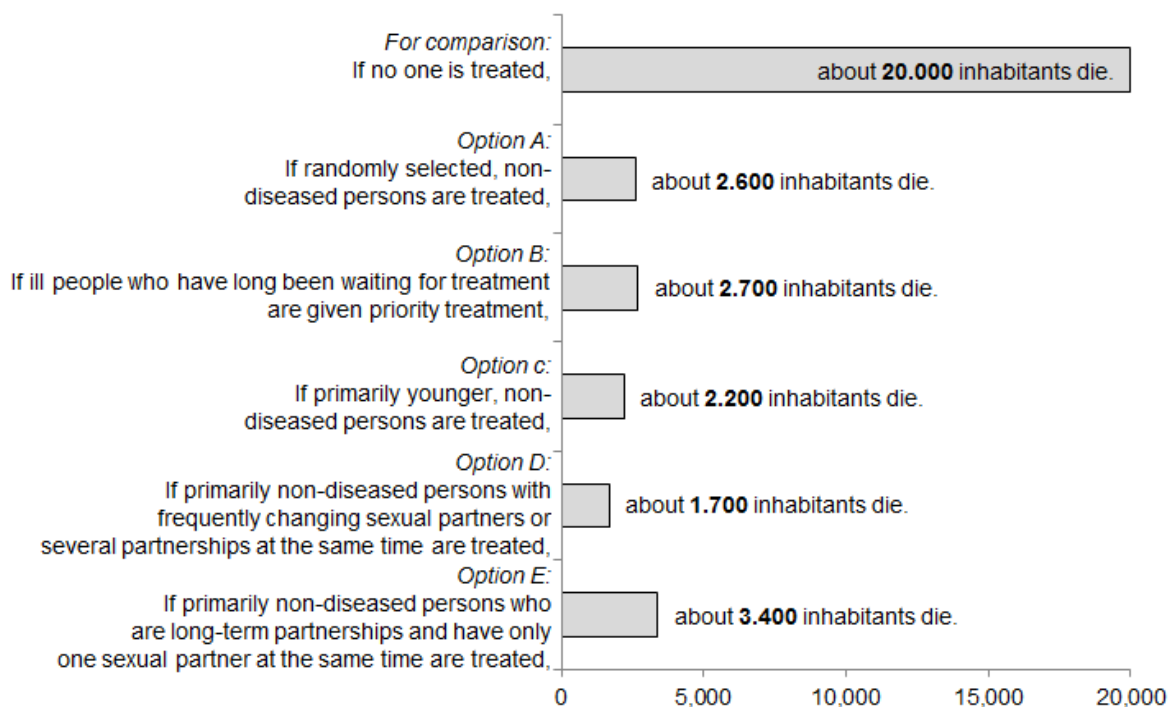

## 5: Question about distribution problem

[FM\_Impfung\_choice] if(FM\_Fragestellung == "1", "How do you think the vaccinations should be distributed in the described situation?", "Which of the following distribution rules do you think is the fairest in the situation described?")

▼ FM\_Szenario == "1"

- Option A: Randomly selected, non-diseased persons are vaccinated.
- Option B: Younger, non-diseased persons are primarily vaccinated.
- Option C: Priority is given to non-diseased individuals who often have changing sexual partners or several partnerships at the same time.
- Option D: Priority is given to non-diseased persons who have long-lasting partnerships and have only one sexual partner at the same time.
- I cannot decide.

[FM\_Impfung\_reason] if(FM\_Impfung\_choice == "90", "Why are you unable to decide? ", If (FM\_Fragestellung == "1", "Why did you choose this distribution of vaccination? ", "Why do you consider the distribution rule you have chosen as the fairest? ")

Please justify your choice with 1 to 5 short sentences. Your answers are very important to the study.

*enter your answer here*

[FM\_Behandlung\_choice] if(FM\_Fragestellung == "1", " How, in your opinion, should the treatment be distributed in the described situation? ", " Which of the following distribution rules do you think is the fairest in the situation described? ")

▼ FM\_Szenario == "2"

- Option A: Randomly selected ill persons are treated.
- Option B: Priority is given to ill people who have been waiting for treatment for a long time.
- Option C: Most younger, ill people are treated.
- Option D: Priority is given to ill-treated persons who frequently have changing sexual partners or several partnerships at the same time.
- Option E: Mainly ill people are treated who have long-lasting partnerships and have only one sexual partner at the same time.
- I cannot decide.

[FM\_Behandlung\_reason] if(FM\_Impfung\_choice == "90", "Why are you unable to decide?", If (FM\_Fragestellung == "1", "Why did you choose this distribution of treatment?", "Why do you consider the distribution rule you have chosen as the fairest?")

Please justify your choice with 1 to 5 short sentences. Your answers are very important to the study.

*enter your answer here*

# P: Frequency of infections during the winter season & influenza vaccination (season 2015/16)

In this questionnaire, we are interested in whether you had an infection of the respiratory tract in the past months and whether you were vaccinated against influenza in the autumn / winter season 2015/16.

## 1: Signs and symptoms

[IN1\_2016] How often have you had an infection of the airways (for example, cold, flu, or otitis media) in the past 12 months?

- Not at all
- Once
- Twice
- Three to four times
- More than four times
- Don't know

[GR\_1] Since September 2014, have you had an illness with high fever (body temperature above 38° C) lasting several days?

- Yes
- No
- I'm not sure

[GR\_2] How many days did you have malaise?

▼ GR\_1 != "No"

*enter your answer here*

[GR\_3] How many days did you have high fever (body temperature above 38° C)?

▼ GR\_1 != "No"

*enter your answer here*

[GR\_4] Did you have other symptoms besides fever?

▼ GR\_1 != "No"

|                         | Yes                      | No                       | Don't know               |
|-------------------------|--------------------------|--------------------------|--------------------------|
| [1] Throat pain         | <input type="checkbox"/> | <input type="checkbox"/> | <input type="checkbox"/> |
| [2] Dry cough           | <input type="checkbox"/> | <input type="checkbox"/> | <input type="checkbox"/> |
| [3] Muscle pain         | <input type="checkbox"/> | <input type="checkbox"/> | <input type="checkbox"/> |
| [4] Joint pain          | <input type="checkbox"/> | <input type="checkbox"/> | <input type="checkbox"/> |
| [5] Back pain           | <input type="checkbox"/> | <input type="checkbox"/> | <input type="checkbox"/> |
| [6] Headaches           | <input type="checkbox"/> | <input type="checkbox"/> | <input type="checkbox"/> |
| [7] Feeling of weakness | <input type="checkbox"/> | <input type="checkbox"/> | <input type="checkbox"/> |

[GR\_4\_8] Other symptoms:

▼ GR\_1 != "No"

*enter your answer here*

## 2: Seeking medical advice

[GR\_5] Did you see a doctor because of this illness?

▼ GR\_1 != "No"

- Yes
- No

[GR\_6] Did the doctor take a sample to diagnose a flu?

▼ (GR\_5 == "Yes")

- Yes
- No

[GR\_7] Did the doctor diagnose a real flu or other disease, e.g. pneumonia, otitis media, or similar?

▼ (GR\_1 != "No") & (GR\_5 == "Yes")

- The doctor has not made any diagnosis.
- The doctor has diagnosed a real flu.
- The doctor has diagnosed another illness, namely:

### 3: Characteristics of the disease

[GR\_8] How many days were you so ill that you had to stay in bed or could not do your normal everyday life (housework, hobbies etc.)?

▼ GR\_1 != "No"

*enter your answer here*

[GR\_9] How many days did you report ill and could not pursue your profession?

▼ GR\_1 != "No"

Does not apply to me

Days:

[GR\_10] How many of these {GR\_9\_other} days were you on ill leave?

▼ (GR\_9 == "-oth-")

Does not apply to me

Days:

[GR\_11] Do you think that this disease might have been the real flu?

Yes

No

I'm not sure

[GR\_11\_comment\_1] Why do you think it was a real flu?

▼ GR\_11 == "Yes"

*enter your answer here*

[GR\_11\_comment\_0] Why do you think it was not a real flu?

▼ GR\_11 == "No"

*enter your answer here*

## 4: Household

[P2\_hh\_single] Do you live alone in your household?

If you live in several households (e.g. weekend commuters), please refer to the household where you spend most of your time.

- Yes
- No

[P2\_hh\_p] How many people, including yourself, are living in your household?

A household includes all persons who live and work together here. Please also think of all children living in the household.

▼ P2\_hh\_single == "No"

*enter your answer here*

[P2\_hh\_age1] How old are the members of your household (including yourself)?

Please start with the youngest members. For children under one year, please enter "0".

▼ P2\_hh\_single == "No"

- [1] Age (in years)
- [2] Age (in years)
- [3] Age (in years)
- [4] Age (in years)
- [5] Age (in years)
- [6] Age (in years)
- [7] Age (in years)
- [8] Age (in years)
- [9] Age (in years)
- [10] Age (in years)

[GR\_12] Are there among those household members people who are particularly vulnerable to flu, e.g. elderly or chronically ill persons?

▼ P2\_hh\_single == "No"

- No
- I am not sure
- Yes, number of persons:

## 5: Household II

[GR\_13] Since September 2014, did someone from your household (not counting you) have an illness with high fever (body temperature above 38° C) lasting several days?

▼ P2\_hh\_single == "No"

- Yes
- No
- I'm not sure

[GR\_14] How many persons from your household (not counting you) have had an illness with high fever (body temperature above 38° C) lasting several days?

▼ GR\_13 == "Yes"

*enter your answer here*

[GR\_15] Do you think that this disease might have been the real flu?

▼ GR\_13 == "Yes"

- Yes
- No
- I'm not sure

[GR\_15\_comment\_1] Why do you think it was a real flu?

▼ GR\_15 == "Yes"

*enter your answer here*

[GR\_15\_comment\_0] Why do you think it was not a real flu?

▼ GR\_15 == "No"

*enter your answer here*

[GR\_16] If you think of your infection with high fever, were the other ill person(s) in your household ill before, at the same time or after yourself?

With this question we would like to find out whether there was any contagion within your household. Please tick all that apply.

(multiple choice possible)

▼ (GR\_1 == "Yes") & (GR\_13 == "Yes")

- In my household, one or more people were ill within 2 weeks before myself.
- In my household, one or more people were ill within two weeks after myself.
- In my household, one or more people were ill with me at the same time.
- In my household, one or more people were ill at another time, that is, not within 2 weeks before or after my own illness.
- I don't know when the other person (s) in my household was ill.

## 6: Influenza vaccination

[GR\_17] Have you been vaccinated against influenza since August 2014?

- Yes
- No
- I'm not sure

[GR\_18] When did you get vaccinated against flu?

▼ GR\_17 == "Yes"

*enter your answer here*

[GR\_19] Where was the influenza vaccination performed?

▼ GR\_17 == "Yes"

- General practitioner
- Company doctor
- Gynecologist
- Pediatrician
- Somewhere else

[GR\_20] Was this influenza vaccination recorded in your vaccination card?

▼ GR\_17 == "Yes"

- I don't have a vaccination card.
- Yes
- No
- Don't know

[GR\_21] Did you have to pay for the influenza vaccination?

▼ GR\_17 == "Yes"

- Yes
- No
- Don't know

[GR\_21\_Zahlung] How much did you have to pay?

▼ GR\_21 == "Yes"

*enter your answer here*

[GR\_22] Would you have been vaccinated against influenza if you had to pay for the vaccination? (The vaccination costs about 20 euros.)

▼ GR\_21 == "No"

- Yes
- No
- Don't know

[GR\_23] After the influenza vaccination, did you have any complaints that you have associated with vaccination?

▼ GR\_17 == "Yes"

- No
- Yes (please specify):



## 7: Influenza vaccination II

[GR\_24] Did anyone give you the advice or recommendation to get vaccinated against influenza?

- Yes
- No
- Don't know

[GR\_25] Who gave you the advice or recommendation to get vaccinated against flu?  
(multiple choice possible)

▼ GR\_24 == "Yes"

- General practioner
- Gynecologist
- Pediatrician
- Family
- Someone else, namely:

[GR\_26] Was the fact that someone gave you the advice or recommendation to get vaccinated against influenza is very important for your decision to get vaccinated?

▼ (GR\_17 == "Yes") & (GR\_24 == "Yes")

- Yes
- No

[GR\_27] Has your company / employer recommended the vaccination, e.g. email, notice on the bulletin board or similar?

- Yes
- No
- Does not apply to me

[GR\_28] Was the fact that your company / employer recommended the vaccination is very important for your decision to get vaccinated?

▼ (GR\_17 == "Yes") & (GR\_27 == "Yes")

- Yes
- No

## 8: Influenza vaccination III

[GR\_29] Do you work in the medical field and have patient contact?

- Yes
- No

[GR\_30] Was the fact that you have patient contact very important for your decision to get vaccinated?

▼ (GR\_17 == "Yes") & (GR\_29 == "Yes")

- Yes
- No

[GR\_31] Was the fact that your household is home to a person for whom a flu would be particularly harmful, very important for your decision to get vaccinated?

▼ (GR\_17 == "Yes") & (GR\_12 == "Yes")

- Yes
- No

## 9: Reason for influenza vaccination

[GR\_32] Did you have the impression that in the media the influenza wave was shown as particularly strong in winter 2014/2015?

- Yes
- No

[GR\_33] Was the fact that in the media the flu wave in the winter 2014/2015 was shown as particularly strong, very important for your decision to get vaccinated?

▼ (GR\_17 == "Yes") & (GR\_32 == "Yes")

- Yes
- No

[GR\_34] Was the fact that you did not want to get yourself influenza very important for your decision to get vaccinated?

▼ GR\_17 == "Yes"

- Yes
- No

[GR\_35] Please summarize briefly why you have been vaccinated:

▼ GR\_17 == "Yes"

*enter your answer here*

## 10: Statements about influenza vaccination

How do you assess the following two statements?

[GR\_36] The information about the influenza vaccination, which I receive through the media, allows me to make a decision on whether to vaccinate myself or not.

- Applies
- Rather applies
- I have not received any such information through the media.
- Does rather not apply
- Does not apply

[GR\_37] The information about the influenza vaccination, which I receive through the media, is clear to me.

- Applies
- Rather applies
- I have not received any such information through the media.
- Does rather not apply
- Does not apply

## 11: Recommendation influenza vaccination

[GR\_38] For which groups of persons is the influenza vaccination recommended by the Standing Immunization Commission (STIKO) at the Robert Koch Institute?

|                                                                                  | Yes                      | No                       | Don't know               |
|----------------------------------------------------------------------------------|--------------------------|--------------------------|--------------------------|
| [1] For the elderly over 60 years.                                               | <input type="checkbox"/> | <input type="checkbox"/> | <input type="checkbox"/> |
| [2] For all adults over 18 years.                                                | <input type="checkbox"/> | <input type="checkbox"/> | <input type="checkbox"/> |
| [3] For persons with increased health risk due to chronic condition.             | <input type="checkbox"/> | <input type="checkbox"/> | <input type="checkbox"/> |
| [4] For children who visit a children's day-care center.                         | <input type="checkbox"/> | <input type="checkbox"/> | <input type="checkbox"/> |
| [5] For persons who work in the medical field and have contact with the patient. | <input type="checkbox"/> | <input type="checkbox"/> | <input type="checkbox"/> |
| [6] For women who are pregnant during the winter half year.                      | <input type="checkbox"/> | <input type="checkbox"/> | <input type="checkbox"/> |

## 12: Outlook influenza vaccination

[GR\_39\_f] Do you belong to one of the following groups?

(multiple choice possible)

- I am over 60 years old.
- I have a chronic condition.
- I have a child / children visiting a children's day.
- I gave birth to a child between September 2014 and March 2015.
- I am currently pregnant.
- I don't belong to one of these groups.

[GR\_40] Are you planning to get vaccinated against influenza in the autumn / winter season 2016/17?

- Yes
- No
- Not decided yet

[GR\_41] Have your experiences with the influenza vaccination in the 2015/16 season affected your decision for the autumn / winter season 2016/17?

▼ GR\_17 == "Yes"

- Yes
- No
- Don't know

[GR\_42] How did your experiences with the influenza vaccination in the 2015/16 season influence your decision for the autumn / winter season 2016/17?

▼ GR\_41 == "Yes"

*enter your answer here*

[GR\_remark] Is there anything else you would like to tell us about this questionnaire?

*enter your answer here*
