# Supplementary material for: Factors associated with attrition in a longitudinal online study: results from the HaBIDS panel
Source: PubMed Central journal article supplement (PMC5580321; doi:10.1186/s12874-017-0408-3), 2017-08-31

Article title:

**Factors associated with attrition in a longitudinal online study:  
results from the HaBIDS panel**

Authors:

Nicole RübSamen; Manas K Akmatov; Stefanie Castell; André Karch; Rafael T. Mikolajczyk

Journal:

BMC Medical Research Methodology

**Additional file 3 – Flow diagram of numbers of individuals at each stage of study**

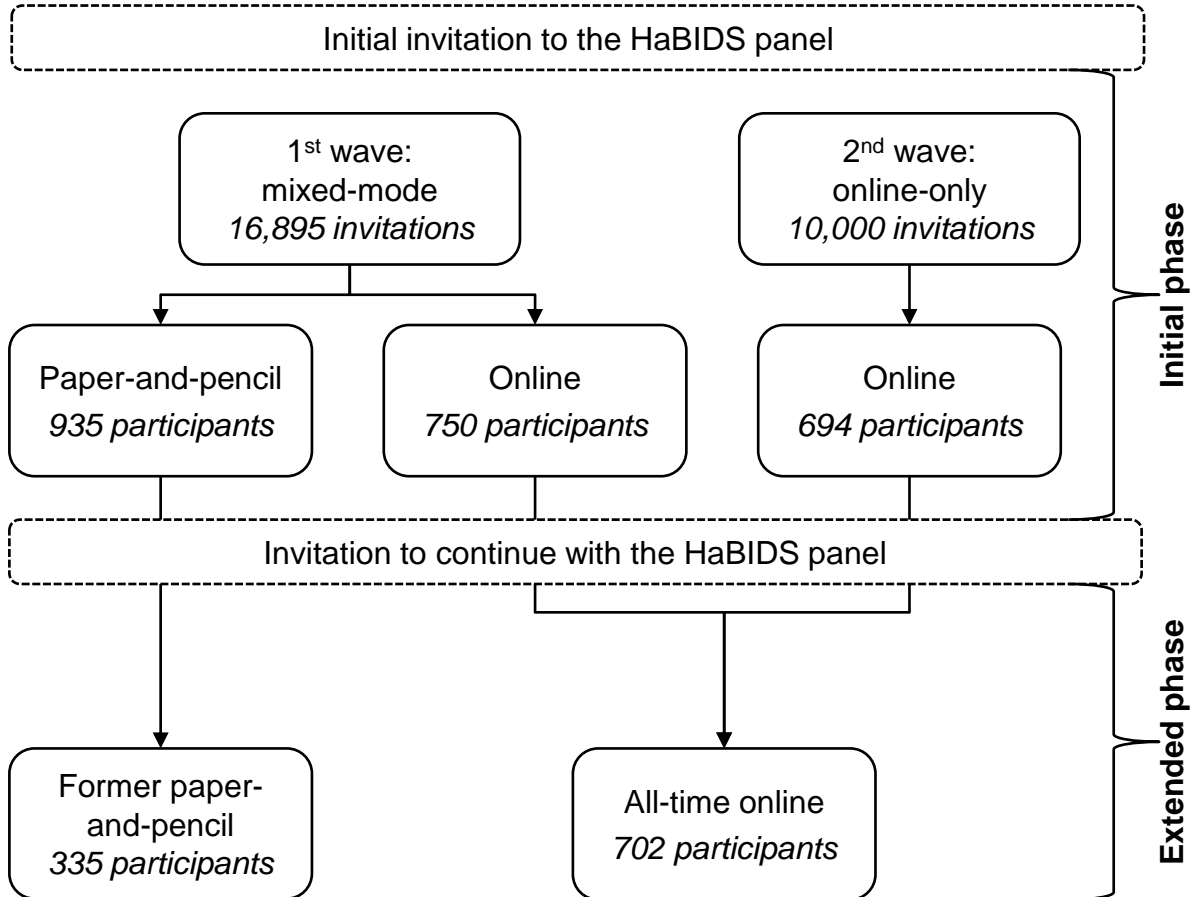

Supplement: 12874_2017_408_MOESM3_ESM.pdf [file 12874_2017_408_MOESM3_ESM.pdf]
