# Supplementary material for: Factors associated with attrition in a longitudinal online study: results from the HaBIDS panel
Source: PubMed Central journal article supplement (PMC5580321; doi:10.1186/s12874-017-0408-3), 2017-08-31
Supplement: 12874_2017_408_MOESM4_ESM.pdf [file 12874_2017_408_MOESM4_ESM.pdf]

Article title:

**Factors associated with attrition in a longitudinal online study: results from the HaBIDS panel**

Authors:

Nicole RübSamen; Manas K Akmatov; Stefanie Castell; André Karch; Rafael T. Mikolajczyk

Journal:

BMC Medical Research Methodology

**Additional file 4 – Definition of discontinuation for each online questionnaire**

|                                         |                                                                       | Questionnaire filled in (x = yes, o = no)                             |   |   |   |   |   |   |   |   |   |   |   |                       |   |   |   |   |
|-----------------------------------------|-----------------------------------------------------------------------|-----------------------------------------------------------------------|---|---|---|---|---|---|---|---|---|---|---|-----------------------|---|---|---|---|
|                                         |                                                                       | A                                                                     | B | C | D | E | F | G | H | I | J | K | L | M                     | N | O | P |   |
| <b>Discontinuation at questionnaire</b> |                                                                       | <b>Initial phase</b>                                                  |   |   |   |   |   |   |   |   |   |   |   |                       |   |   |   |   |
|                                         | A                                                                     | Start with all participants who filled in questionnaire A             |   |   |   |   |   |   |   |   |   |   |   |                       |   |   |   |   |
|                                         | B                                                                     | x                                                                     | o | o | o | o | o | o | o | o | o | o |   |                       |   |   |   |   |
|                                         | C                                                                     | x                                                                     | x | o | o | o | o | o | o | o | o | o |   |                       |   |   |   |   |
|                                         | D                                                                     | x                                                                     | x | x | o | o | o | o | o | o | o | o |   |                       |   |   |   |   |
|                                         | E                                                                     | x                                                                     | x | x | x | o | o | o | o | o | o | o |   |                       |   |   |   |   |
|                                         | F                                                                     | x                                                                     | x | x | x | x | o | o | o | o | o | o |   |                       |   |   |   |   |
|                                         | G                                                                     | x                                                                     | x | x | x | x | x | o | o | o | o | o |   |                       |   |   |   |   |
|                                         | H                                                                     | x                                                                     | x | x | x | x | x | x | o | o | o | o |   |                       |   |   |   |   |
|                                         | I                                                                     | x                                                                     | x | x | x | x | x | x | x | o | o | o |   |                       |   |   |   |   |
|                                         | J                                                                     | x                                                                     | x | x | x | x | x | x | x | x | o | o |   |                       |   |   |   |   |
|                                         | K                                                                     | By definition, discontinuation cannot be evaluated at questionnaire K |   |   |   |   |   |   |   |   |   |   |   |                       |   |   |   |   |
|                                         |                                                                       |                                                                       |   |   |   |   |   |   |   |   |   |   |   | <b>Extended phase</b> |   |   |   |   |
|                                         | L                                                                     | Start with all participants who filled in questionnaire L             |   |   |   |   |   |   |   |   |   |   |   |                       |   |   |   |   |
|                                         | M                                                                     |                                                                       |   |   |   |   |   |   |   |   |   |   |   | x                     | o | o | o | o |
| N                                       |                                                                       |                                                                       |   |   |   |   |   |   |   |   |   |   | x | x                     | o | o | o |   |
| O                                       |                                                                       |                                                                       |   |   |   |   |   |   |   |   |   |   | x | x                     | x | o | o |   |
| P                                       | By definition, discontinuation cannot be evaluated at questionnaire P |                                                                       |   |   |   |   |   |   |   |   |   |   |   |                       |   |   |   |   |
