# Supplementary material for: Factors associated with attrition in a longitudinal online study: results from the HaBIDS panel
Source: BMC Med Res Methodol. 2017 Aug 31;17:132. doi: 10.1186/s12874-017-0408-3 (PMC5580321; doi:10.1186/s12874-017-0408-3)
Supplement: Supplementary file 5 — Comparison of the study population’s composition with the target population’s (inhabitants of Lower Saxony between 15 and 69 years of age) composition. Data about the target population are taken from the Census 2011 by the Federal Statistical Office of Germany [19]. (PDF 322 kb) [file 12874_2017_408_MOESM5_ESM.pdf]

\* Still at upper secondary school

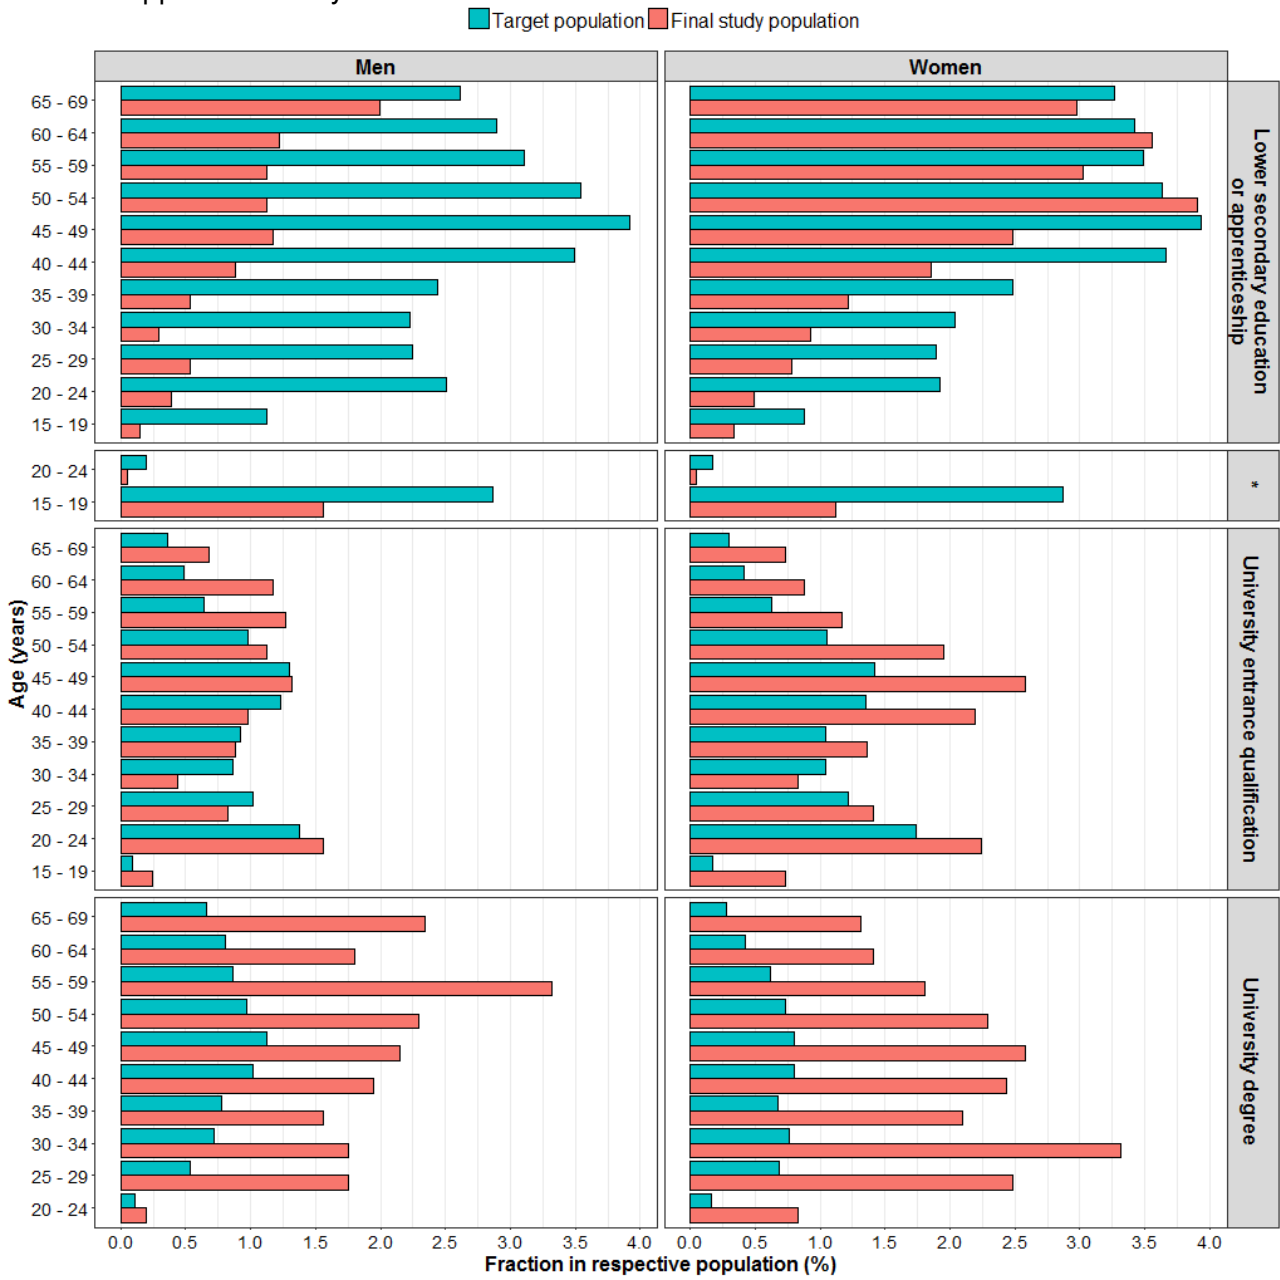

Composition of the target population is available from:

[https://ergebnisse.zensus2011.de/#dynTable:statUnit=PERSON;absRel=ANZAHL;ags=03;agsAxis=X;yAxis=SCHULABS,BERUFABS\\_AUSF,GESCHLECHT,ALTER\\_05JG](https://ergebnisse.zensus2011.de/#dynTable:statUnit=PERSON;absRel=ANZAHL;ags=03;agsAxis=X;yAxis=SCHULABS,BERUFABS_AUSF,GESCHLECHT,ALTER_05JG)

The original data that were exported from the URL above can be found on the following pages.

Personen nach Alter (5er-Jahresgruppen), Höchster beruflicher Abschluss (ausführlich) und weitere Merkmale für Niedersachsen (Bundesland)  
Hochrechnung aus der Haushaltsstichprobe

|           |              | Niedersachsen<br>(Bundesland) |
|-----------|--------------|-------------------------------|
| Insgesamt | Insgesamt    | 6 630 290                     |
|           | Unter 5      | /                             |
|           | 5 - 9        | /                             |
|           | 10 - 14      | /                             |
|           | 15 - 19      | 436 170                       |
|           | 20 - 24      | 444 920                       |
|           | 25 - 29      | 413 660                       |
|           | 30 - 34      | 415 880                       |
|           | 35 - 39      | 452 500                       |
|           | 40 - 44      | 626 700                       |
|           | Insgesamt    | 678 070                       |
|           | 50 - 54      | 590 980                       |
|           | 55 - 59      | 506 190                       |
|           | 60 - 64      | 459 030                       |
|           | 65 - 69      | 406 080                       |
|           | 70 - 74      | 475 500                       |
|           | 75 - 79      | 315 960                       |
|           | 80 - 84      | 226 210                       |
|           | 85 - 89      | 130 290                       |
|           | 90 und älter | 52 140                        |
|           | Insgesamt    | 3 210 960                     |
|           | Unter 5      | /                             |
|           | 5 - 9        | /                             |
|           | 10 - 14      | /                             |
|           | 15 - 19      | 222 630                       |
|           | 20 - 24      | 227 640                       |
|           | 25 - 29      | 207 070                       |
|           | 30 - 34      | 206 760                       |
|           | 35 - 39      | 224 650                       |
|           | 40 - 44      | 311 410                       |
|           | 45 - 49      | 344 130                       |
|           | 50 - 54      | 297 650                       |
|           | 55 - 59      | 250 100                       |
|           | 60 - 64      | 227 130                       |
|           | 65 - 69      | 197 170                       |
|           | 70 - 74      | 221 490                       |
|           | 75 - 79      | 138 960                       |
|           | 80 - 84      | 85 330                        |
|           | 85 - 89      | 38 440                        |
|           | 90 und älter | 10 410                        |
|           | Insgesamt    | 3 419 330                     |
|           | Unter 5      | /                             |
|           | 5 - 9        | /                             |
|           | 10 - 14      | /                             |
|           | 15 - 19      | 213 550                       |
|           | 20 - 24      | 217 280                       |
|           | 25 - 29      | 206 590                       |
|           | 30 - 34      | 209 120                       |
|           | 35 - 39      | 227 850                       |
|           | 40 - 44      | 315 290                       |
|           | 45 - 49      | 333 940                       |
|           | 50 - 54      | 293 330                       |

Noch: Personen nach Alter (5er-Jahresgruppen), Höchster beruflicher Abschluss (ausführlich) und weitere Merkmale für Niedersachsen (Bundesland)

|           |              | Niedersachsen<br>(Bundesland) |
|-----------|--------------|-------------------------------|
| Insgesamt | 55 - 59      | 256 090                       |
|           | 60 - 64      | 231 900                       |
|           | 65 - 69      | 208 920                       |
|           | 70 - 74      | 254 010                       |
|           | 75 - 79      | 177 000                       |
|           | 80 - 84      | 140 890                       |
|           | 85 - 89      | 91 850                        |
|           | 90 und älter | 41 720                        |
|           | Insgesamt    | 1 900 720                     |
|           | Unter 5      | /                             |
|           | 5 - 9        | /                             |
|           | 10 - 14      | /                             |
|           | 15 - 19      | 421 550                       |
|           | 20 - 24      | 240 940                       |
|           | 25 - 29      | 94 740                        |
|           | 30 - 34      | 76 070                        |
|           | 35 - 39      | 75 170                        |
|           | 40 - 44      | 97 120                        |
|           | Insgesamt    | 113 300                       |
|           | 45 - 49      | 107 230                       |
|           | 50 - 54      | 86 650                        |
|           | 55 - 59      | 79 240                        |
|           | 60 - 64      | 79 850                        |
|           | 65 - 69      | 132 590                       |
|           | 70 - 74      | 120 440                       |
|           | 75 - 79      | 95 120                        |
|           | 80 - 84      | 55 690                        |
|           | 85 - 89      | 25 010                        |
|           | 90 und älter | 767 810                       |
|           | Insgesamt    | Unter 5 /                     |
|           | 5 - 9        | /                             |
|           | 10 - 14      | /                             |
|           | 15 - 19      | 214 660                       |
|           | 20 - 24      | 121 800                       |
|           | 25 - 29      | 50 390                        |
|           | 30 - 34      | 36 740                        |
|           | 35 - 39      | 34 750                        |
|           | 40 - 44      | 42 970                        |
|           | 45 - 49      | 52 550                        |
|           | 50 - 54      | 45 540                        |
|           | 55 - 59      | 32 450                        |
|           | 60 - 64      | 24 840                        |
|           | 65 - 69      | 23 040                        |
|           | 70 - 74      | 33 690                        |
|           | 75 - 79      | 26 230                        |
|           | 80 - 84      | 17 650                        |
|           | 85 - 89      | 8 360                         |
|           | 90 und älter | 2 160                         |
|           | Insgesamt    | 1 132 910                     |
|           | Unter 5      | /                             |
|           | 5 - 9        | /                             |
|           | 10 - 14      | /                             |
|           | 15 - 19      | 206 890                       |

Noch: Personen nach Alter (5er-Jahresgruppen), Höchster beruflicher Abschluss (ausführlich) und weitere Merkmale für Niedersachsen (Bundesland)

|              | Niedersachsen<br>(Bundesland) |
|--------------|-------------------------------|
| 20 - 24      | 119 130                       |
| 25 - 29      | 44 350                        |
| 30 - 34      | 39 330                        |
| 35 - 39      | 40 420                        |
| 40 - 44      | 54 150                        |
| 45 - 49      | 60 750                        |
| 50 - 54      | 61 690                        |
| 55 - 59      | 54 200                        |
| 60 - 64      | 54 400                        |
| 65 - 69      | 56 820                        |
| 70 - 74      | 98 900                        |
| 75 - 79      | 94 210                        |
| 80 - 84      | 77 470                        |
| 85 - 89      | 47 340                        |
| 90 und älter | 22 850                        |
| Insgesamt    | 3 134 140                     |
| Unter 5      | /                             |
| 5 - 9        | /                             |
| 10 - 14      | /                             |
| 15 - 19      | 12 110                        |
| 20 - 24      | 160 320                       |
| 25 - 29      | 205 470                       |
| 30 - 34      | 203 260                       |
| 35 - 39      | 234 530                       |
| 40 - 44      | 336 150                       |
| 45 - 49      | 355 270                       |
| 50 - 54      | 303 030                       |
| 55 - 59      | 272 750                       |
| 60 - 64      | 252 930                       |
| 65 - 69      | 225 540                       |
| 70 - 74      | 249 010                       |
| 75 - 79      | 145 410                       |
| 80 - 84      | 99 300                        |
| 85 - 89      | 57 560                        |
| 90 und älter | 21 510                        |
| Insgesamt    | 1 576 330                     |
| Unter 5      | /                             |
| 5 - 9        | /                             |
| 10 - 14      | /                             |
| 15 - 19      | 7 280                         |
| 20 - 24      | 90 090                        |
| 25 - 29      | 109 790                       |
| 30 - 34      | 106 090                       |
| 35 - 39      | 117 250                       |
| 40 - 44      | 164 130                       |
| 45 - 49      | 176 380                       |
| 50 - 54      | 154 910                       |
| 55 - 59      | 136 090                       |
| 60 - 64      | 124 230                       |
| 65 - 69      | 108 730                       |
| 70 - 74      | 126 350                       |
| 75 - 79      | 79 380                        |
| 80 - 84      | 48 420                        |

Lehre,  
Berufsausbildung im  
dualen System

Männlich

Noch: Personen nach Alter (5er-Jahresgruppen), Höchster beruflicher Abschluss (ausführlich) und weitere Merkmale für Niedersachsen (Bundesland)

|              | Niedersachsen<br>(Bundesland) |
|--------------|-------------------------------|
| 85 - 89      | 21 380                        |
| 90 und älter | 5 840                         |
| Insgesamt    | 1 557 820                     |
| Unter 5      | /                             |
| 5 - 9        | /                             |
| 10 - 14      | /                             |
| 15 - 19      | 4 830                         |
| 20 - 24      | 70 240                        |
| 25 - 29      | 95 680                        |
| 30 - 34      | 97 170                        |
| 35 - 39      | 117 270                       |
| 40 - 44      | 172 020                       |
| 45 - 49      | 178 890                       |
| 50 - 54      | 148 130                       |
| 55 - 59      | 136 660                       |
| 60 - 64      | 128 700                       |
| 65 - 69      | 116 810                       |
| 70 - 74      | 122 670                       |
| 75 - 79      | 66 030                        |
| 80 - 84      | 50 880                        |
| 85 - 89      | 36 180                        |
| 90 und älter | 15 660                        |
| Insgesamt    | 688 650                       |
| Unter 5      | /                             |
| 5 - 9        | /                             |
| 10 - 14      | /                             |
| 15 - 19      | 2 510                         |
| 20 - 24      | 25 420                        |
| 25 - 29      | 41 460                        |
| 30 - 34      | 48 040                        |
| 35 - 39      | 55 420                        |
| 40 - 44      | 83 630                        |
| 45 - 49      | 93 990                        |
| 50 - 54      | 80 630                        |
| 55 - 59      | 59 990                        |
| 60 - 64      | 53 380                        |
| 65 - 69      | 44 500                        |
| 70 - 74      | 46 790                        |
| 75 - 79      | 25 550                        |
| 80 - 84      | 16 090                        |
| 85 - 89      | 8 400                         |
| 90 und älter | 2 860                         |
| Insgesamt    | 347 500                       |
| Unter 5      | /                             |
| 5 - 9        | /                             |
| 10 - 14      | /                             |
| 15 - 19      | 680                           |
| 20 - 24      | 8 490                         |
| 25 - 29      | 15 630                        |
| 30 - 34      | 21 430                        |
| 35 - 39      | 25 830                        |
| 40 - 44      | 43 490                        |
| 45 - 49      | 48 060                        |

Weiblich

Insgesamt

Fachschulabschluss

Männlich

Noch: Personen nach Alter (5er-Jahresgruppen), Höchster beruflicher Abschluss (ausführlich) und weitere Merkmale für Niedersachsen (Bundesland)

|              | Niedersachsen<br>(Bundesland) |
|--------------|-------------------------------|
| 50 - 54      | 40 190                        |
| 55 - 59      | 30 710                        |
| 60 - 64      | 30 710                        |
| 65 - 69      | 26 400                        |
| 70 - 74      | 27 970                        |
| 75 - 79      | 15 030                        |
| 80 - 84      | 8 650                         |
| 85 - 89      | 3 360                         |
| 90 und älter | 870                           |
| Insgesamt    | 341 150                       |
| Unter 5      | /                             |
| 5 - 9        | /                             |
| 10 - 14      | /                             |
| 15 - 19      | 1 830                         |
| 20 - 24      | 16 930                        |
| 25 - 29      | 25 830                        |
| 30 - 34      | 26 610                        |
| 35 - 39      | 29 590                        |
| 40 - 44      | 40 140                        |
| 45 - 49      | 45 930                        |
| 50 - 54      | 40 440                        |
| 55 - 59      | 29 280                        |
| 60 - 64      | 22 670                        |
| 65 - 69      | 18 110                        |
| 70 - 74      | 18 820                        |
| 75 - 79      | 10 520                        |
| 80 - 84      | 7 440                         |
| 85 - 89      | 5 040                         |
| 90 und älter | 1 990                         |
| Insgesamt    | 82 130                        |
| Unter 5      | /                             |
| 5 - 9        | /                             |
| 10 - 14      | /                             |
| 15 - 19      | /                             |
| 20 - 24      | 2 930                         |
| 25 - 29      | 5 970                         |
| 30 - 34      | 8 220                         |
| 35 - 39      | 8 750                         |
| 40 - 44      | 11 400                        |
| 45 - 49      | 10 850                        |
| 50 - 54      | 8 180                         |
| 55 - 59      | 6 450                         |
| 60 - 64      | 6 540                         |
| 65 - 69      | 4 810                         |
| 70 - 74      | 3 730                         |
| 75 - 79      | 1 940                         |
| 80 - 84      | 1 220                         |
| 85 - 89      | 880                           |
| 90 und älter | /                             |
| Insgesamt    | 43 970                        |
| Unter 5      | /                             |
| 5 - 9        | /                             |
| 10 - 14      | /                             |

Weiblich

Insgesamt

Abschluss einer  
Fachakademie oder  
Berufsakademie

Männlich

Noch: Personen nach Alter (5er-Jahresgruppen), Höchster beruflicher Abschluss (ausführlich) und weitere Merkmale für Niedersachsen (Bundesland)

|              | Niedersachsen<br>(Bundesland) |
|--------------|-------------------------------|
| 15 - 19      | /                             |
| 20 - 24      | 1 290                         |
| 25 - 29      | 2 400                         |
| 30 - 34      | 3 720                         |
| 35 - 39      | 4 550                         |
| 40 - 44      | 5 820                         |
| 45 - 49      | 6 100                         |
| 50 - 54      | 4 580                         |
| 55 - 59      | 3 810                         |
| 60 - 64      | 3 640                         |
| 65 - 69      | 3 310                         |
| 70 - 74      | 2 370                         |
| 75 - 79      | 1 250                         |
| 80 - 84      | 650                           |
| 85 - 89      | /                             |
| 90 und älter | /                             |
| Insgesamt    | 38 160                        |
| Unter 5      | /                             |
| 5 - 9        | /                             |
| 10 - 14      | /                             |
| 15 - 19      | /                             |
| 20 - 24      | 1 630                         |
| 25 - 29      | 3 570                         |
| 30 - 34      | 4 500                         |
| 35 - 39      | 4 200                         |
| 40 - 44      | 5 590                         |
| 45 - 49      | 4 750                         |
| 50 - 54      | 3 600                         |
| 55 - 59      | 2 640                         |
| 60 - 64      | 2 890                         |
| 65 - 69      | 1 500                         |
| 70 - 74      | 1 370                         |
| 75 - 79      | 690                           |
| 80 - 84      | 580                           |
| 85 - 89      | 470                           |
| 90 und älter | /                             |
| Insgesamt    | 326 020                       |
| Unter 5      | /                             |
| 5 - 9        | /                             |
| 10 - 14      | /                             |
| 15 - 19      | /                             |
| 20 - 24      | 5 620                         |
| 25 - 29      | 21 650                        |
| 30 - 34      | 30 050                        |
| 35 - 39      | 30 310                        |
| 40 - 44      | 40 420                        |
| 45 - 49      | 43 940                        |
| 50 - 54      | 39 020                        |
| 55 - 59      | 30 620                        |
| 60 - 64      | 24 970                        |
| 65 - 69      | 20 720                        |
| 70 - 74      | 18 950                        |
| 75 - 79      | 9 890                         |

Weiblich

Fachhochschulabschl  
uss

Insgesamt

Noch: Personen nach Alter (5er-Jahresgruppen), Höchster beruflicher Abschluss (ausführlich) und weitere Merkmale für Niedersachsen (Bundesland)

|                    | Niedersachsen<br>(Bundesland) |
|--------------------|-------------------------------|
| 80 - 84            | 5 570                         |
| 85 - 89            | 3 340                         |
| 90 und älter       | 940                           |
| Insgesamt          | 213 800                       |
| Unter 5            | /                             |
| 5 - 9              | /                             |
| 10 - 14            | /                             |
| 15 - 19            | /                             |
| 20 - 24            | 2 520                         |
| 25 - 29            | 11 360                        |
| 30 - 34            | 16 840                        |
| 35 - 39            | 18 740                        |
| 40 - 44            | 25 380                        |
| Männlich           |                               |
| 45 - 49            | 28 720                        |
| 50 - 54            | 24 860                        |
| 55 - 59            | 19 550                        |
| 60 - 64            | 18 790                        |
| 65 - 69            | 16 220                        |
| 70 - 74            | 15 360                        |
| 75 - 79            | 8 110                         |
| 80 - 84            | 4 250                         |
| 85 - 89            | 2 430                         |
| 90 und älter       | 670                           |
| Insgesamt          | 112 220                       |
| Unter 5            | /                             |
| 5 - 9              | /                             |
| 10 - 14            | /                             |
| 15 - 19            | /                             |
| 20 - 24            | 3 100                         |
| 25 - 29            | 10 290                        |
| 30 - 34            | 13 210                        |
| 35 - 39            | 11 570                        |
| Weiblich           |                               |
| 40 - 44            | 15 040                        |
| 45 - 49            | 15 220                        |
| 50 - 54            | 14 160                        |
| 55 - 59            | 11 070                        |
| 60 - 64            | 6 180                         |
| 65 - 69            | 4 500                         |
| 70 - 74            | 3 590                         |
| 75 - 79            | 1 770                         |
| 80 - 84            | 1 330                         |
| 85 - 89            | 910                           |
| 90 und älter       | /                             |
| Insgesamt          | 431 870                       |
| Unter 5            | /                             |
| 5 - 9              | /                             |
| 10 - 14            | /                             |
| 15 - 19            | /                             |
| Hochschulabschluss |                               |
| 20 - 24            | 9 520                         |
| 25 - 29            | 43 010                        |
| 30 - 34            | 45 100                        |
| 35 - 39            | 40 990                        |
| 40 - 44            | 49 880                        |

Noch: Personen nach Alter (5er-Jahresgruppen), Höchster beruflicher Abschluss (ausführlich) und weitere Merkmale für Niedersachsen (Bundesland)

|              | Niedersachsen<br>(Bundesland) |
|--------------|-------------------------------|
| 45 - 49      | 51 340                        |
| 50 - 54      | 44 700                        |
| 55 - 59      | 43 170                        |
| 60 - 64      | 36 700                        |
| 65 - 69      | 26 010                        |
| 70 - 74      | 19 900                        |
| 75 - 79      | 9 930                         |
| 80 - 84      | 6 790                         |
| 85 - 89      | 3 690                         |
| 90 und älter | 1 160                         |
| Insgesamt    | 215 510                       |
| Unter 5      | /                             |
| 5 - 9        | /                             |
| 10 - 14      | /                             |
| 15 - 19      | /                             |
| 20 - 24      | 3 290                         |
| 25 - 29      | 17 020                        |
| 30 - 34      | 19 470                        |
| 35 - 39      | 19 260                        |
| Männlich     |                               |
| 40 - 44      | 24 200                        |
| 45 - 49      | 26 130                        |
| 50 - 54      | 21 990                        |
| 55 - 59      | 22 580                        |
| 60 - 64      | 20 650                        |
| 65 - 69      | 15 680                        |
| 70 - 74      | 12 030                        |
| 75 - 79      | 6 630                         |
| 80 - 84      | 4 020                         |
| 85 - 89      | 2 020                         |
| 90 und älter | 550                           |
| Insgesamt    | 216 370                       |
| Unter 5      | /                             |
| 5 - 9        | /                             |
| 10 - 14      | /                             |
| 15 - 19      | /                             |
| 20 - 24      | 6 230                         |
| 25 - 29      | 25 980                        |
| 30 - 34      | 25 630                        |
| 35 - 39      | 21 730                        |
| Weiblich     |                               |
| 40 - 44      | 25 670                        |
| 45 - 49      | 25 210                        |
| 50 - 54      | 22 710                        |
| 55 - 59      | 20 600                        |
| 60 - 64      | 16 050                        |
| 65 - 69      | 10 330                        |
| 70 - 74      | 7 860                         |
| 75 - 79      | 3 300                         |
| 80 - 84      | 2 770                         |
| 85 - 89      | 1 680                         |
| 90 und älter | 610                           |
| Insgesamt    | 66 750                        |
| Promotion    |                               |
| Insgesamt    |                               |
| Unter 5      | /                             |
| 5 - 9        | /                             |

Noch: Personen nach Alter (5er-Jahresgruppen), Höchster beruflicher Abschluss (ausführlich) und weitere Merkmale für Niedersachsen (Bundesland)

|              | Niedersachsen<br>(Bundesland) |
|--------------|-------------------------------|
| 10 - 14      | /                             |
| 15 - 19      | /                             |
| 20 - 24      | /                             |
| 25 - 29      | 1 380                         |
| 30 - 34      | 5 140                         |
| 35 - 39      | 7 340                         |
| 40 - 44      | 8 110                         |
| 45 - 49      | 9 380                         |
| 50 - 54      | 8 180                         |
| 55 - 59      | 6 540                         |
| 60 - 64      | 5 280                         |
| 65 - 69      | 4 650                         |
| 70 - 74      | 4 520                         |
| 75 - 79      | 2 810                         |
| 80 - 84      | 2 120                         |
| 85 - 89      | 730                           |
| 90 und älter | 390                           |
| Insgesamt    | 46 050                        |
| Unter 5      | /                             |
| 5 - 9        | /                             |
| 10 - 14      | /                             |
| 15 - 19      | /                             |
| 20 - 24      | /                             |
| 25 - 29      | 480                           |
| 30 - 34      | 2 470                         |
| 35 - 39      | 4 280                         |
| 40 - 44      | 5 420                         |
| 45 - 49      | 6 200                         |
| 50 - 54      | 5 590                         |
| 55 - 59      | 4 910                         |
| 60 - 64      | 4 270                         |
| 65 - 69      | 3 790                         |
| 70 - 74      | 3 710                         |
| 75 - 79      | 2 330                         |
| 80 - 84      | 1 690                         |
| 85 - 89      | 500                           |
| 90 und älter | /                             |
| Insgesamt    | 20 700                        |
| Unter 5      | /                             |
| 5 - 9        | /                             |
| 10 - 14      | /                             |
| 15 - 19      | /                             |
| 20 - 24      | /                             |
| 25 - 29      | 900                           |
| 30 - 34      | 2 670                         |
| 35 - 39      | 3 070                         |
| 40 - 44      | 2 690                         |
| 45 - 49      | 3 180                         |
| 50 - 54      | 2 590                         |
| 55 - 59      | 1 630                         |
| 60 - 64      | 1 010                         |
| 65 - 69      | 860                           |
| 70 - 74      | 800                           |

Noch: Personen nach Alter (5er-Jahresgruppen), Höchster beruflicher Abschluss (ausführlich) und weitere Merkmale für Niedersachsen (Bundesland)

|              | Niedersachsen<br>(Bundesland) |
|--------------|-------------------------------|
| 75 - 79      | 480                           |
| 80 - 84      | 430                           |
| 85 - 89      | /                             |
| 90 und älter | /                             |
| Insgesamt    | 487 510                       |
| Unter 5      | /                             |
| 5 - 9        | /                             |
| 10 - 14      | /                             |
| 15 - 19      | 199 050                       |
| 20 - 24      | 19 720                        |
| 25 - 29      | 17 160                        |
| 30 - 34      | 19 460                        |
| 35 - 39      | 21 160                        |
| 40 - 44      | 25 370                        |
| 45 - 49      | 28 870                        |
| 50 - 54      | 26 000                        |
| 55 - 59      | 20 610                        |
| 60 - 64      | 18 640                        |
| 65 - 69      | 16 080                        |
| 70 - 74      | 23 000                        |
| 75 - 79      | 25 120                        |
| 80 - 84      | 16 860                        |
| 85 - 89      | 7 050                         |
| 90 und älter | 3 330                         |
| Insgesamt    | 240 960                       |
| Unter 5      | /                             |
| 5 - 9        | /                             |
| 10 - 14      | /                             |
| 15 - 19      | 106 260                       |
| 20 - 24      | 11 240                        |
| 25 - 29      | 8 990                         |
| 30 - 34      | 10 180                        |
| 35 - 39      | 9 780                         |
| 40 - 44      | 12 720                        |
| 45 - 49      | 15 360                        |
| 50 - 54      | 13 720                        |
| 55 - 59      | 10 070                        |
| 60 - 64      | 8 650                         |
| 65 - 69      | 7 540                         |
| 70 - 74      | 9 770                         |
| 75 - 79      | 9 220                         |
| 80 - 84      | 5 390                         |
| 85 - 89      | 1 570                         |
| 90 und älter | 500                           |
| Insgesamt    | 246 550                       |
| Unter 5      | /                             |
| 5 - 9        | /                             |
| 10 - 14      | /                             |
| 15 - 19      | 92 790                        |
| 20 - 24      | 8 490                         |
| 25 - 29      | 8 170                         |
| 30 - 34      | 9 280                         |
| 35 - 39      | 11 390                        |

Noch: Personen nach Alter (5er-Jahresgruppen), Höchster beruflicher Abschluss (ausführlich) und weitere Merkmale für Niedersachsen (Bundesland)

|                               |              | Niedersachsen<br>(Bundesland) |
|-------------------------------|--------------|-------------------------------|
|                               | 40 - 44      | 12 650                        |
|                               | 45 - 49      | 13 510                        |
|                               | 50 - 54      | 12 270                        |
|                               | 55 - 59      | 10 550                        |
|                               | 60 - 64      | 9 990                         |
|                               | 65 - 69      | 8 540                         |
|                               | 70 - 74      | 13 230                        |
|                               | 75 - 79      | 15 900                        |
|                               | 80 - 84      | 11 470                        |
|                               | 85 - 89      | 5 480                         |
|                               | 90 und älter | 2 840                         |
|                               | Insgesamt    | 439 850                       |
|                               | Unter 5      | /                             |
|                               | 5 - 9        | /                             |
|                               | 10 - 14      | /                             |
|                               | 15 - 19      | 198 560                       |
|                               | 20 - 24      | 18 510                        |
|                               | 25 - 29      | 15 380                        |
|                               | 30 - 34      | 17 390                        |
|                               | 35 - 39      | 18 610                        |
| Insgesamt                     | 40 - 44      | 22 280                        |
|                               | 45 - 49      | 24 880                        |
|                               | 50 - 54      | 22 070                        |
|                               | 55 - 59      | 16 340                        |
|                               | 60 - 64      | 13 820                        |
|                               | 65 - 69      | 12 780                        |
|                               | 70 - 74      | 18 260                        |
|                               | 75 - 79      | 19 550                        |
|                               | 80 - 84      | 12 630                        |
|                               | 85 - 89      | 6 060                         |
|                               | 90 und älter | 2 730                         |
| Ohne beruflichen<br>Abschluss | Insgesamt    | 211 180                       |
|                               | Unter 5      | /                             |
|                               | 5 - 9        | /                             |
|                               | 10 - 14      | /                             |
|                               | 15 - 19      | 105 990                       |
|                               | 20 - 24      | 10 480                        |
|                               | 25 - 29      | 7 740                         |
|                               | 30 - 34      | 8 820                         |
|                               | 35 - 39      | 8 010                         |
| Männlich                      | 40 - 44      | 10 590                        |
|                               | 45 - 49      | 12 470                        |
|                               | 50 - 54      | 10 900                        |
|                               | 55 - 59      | 7 460                         |
|                               | 60 - 64      | 5 560                         |
|                               | 65 - 69      | 5 720                         |
|                               | 70 - 74      | 6 830                         |
|                               | 75 - 79      | 5 990                         |
|                               | 80 - 84      | 3 040                         |
|                               | 85 - 89      | 1 220                         |
|                               | 90 und älter | 360                           |
| Weiblich                      | Insgesamt    | 228 670                       |
|                               | Unter 5      | /                             |

Noch: Personen nach Alter (5er-Jahresgruppen), Höchster beruflicher Abschluss (ausführlich) und weitere Merkmale für Niedersachsen (Bundesland)

|                                                |              | Niedersachsen<br>(Bundesland) |
|------------------------------------------------|--------------|-------------------------------|
|                                                | 5 - 9        | /                             |
|                                                | 10 - 14      | /                             |
|                                                | 15 - 19      | 92 570                        |
|                                                | 20 - 24      | 8 030                         |
|                                                | 25 - 29      | 7 630                         |
|                                                | 30 - 34      | 8 570                         |
|                                                | 35 - 39      | 10 600                        |
|                                                | 40 - 44      | 11 690                        |
|                                                | 45 - 49      | 12 410                        |
|                                                | 50 - 54      | 11 170                        |
|                                                | 55 - 59      | 8 890                         |
|                                                | 60 - 64      | 8 260                         |
|                                                | 65 - 69      | 7 050                         |
|                                                | 70 - 74      | 11 430                        |
|                                                | 75 - 79      | 13 560                        |
|                                                | 80 - 84      | 9 590                         |
|                                                | 85 - 89      | 4 850                         |
|                                                | 90 und älter | 2 380                         |
|                                                | Insgesamt    | 42 030                        |
|                                                | Unter 5      | /                             |
|                                                | 5 - 9        | /                             |
|                                                | 10 - 14      | /                             |
|                                                | 15 - 19      | /                             |
|                                                | 20 - 24      | 1 020                         |
|                                                | 25 - 29      | 1 530                         |
|                                                | 30 - 34      | 1 890                         |
|                                                | 35 - 39      | 2 260                         |
|                                                | 40 - 44      | 2 700                         |
| Insgesamt                                      | 45 - 49      | 3 330                         |
|                                                | 50 - 54      | 3 360                         |
|                                                | 55 - 59      | 3 950                         |
|                                                | 60 - 64      | 4 210                         |
|                                                | 65 - 69      | 2 800                         |
|                                                | 70 - 74      | 4 280                         |
|                                                | 75 - 79      | 5 260                         |
| Lehre,<br>Berufsausbildung im<br>dualen System | 80 - 84      | 3 730                         |
|                                                | 85 - 89      | 950                           |
|                                                | 90 und älter | 480                           |
|                                                | Insgesamt    | 26 120                        |
|                                                | Unter 5      | /                             |
|                                                | 5 - 9        | /                             |
|                                                | 10 - 14      | /                             |
|                                                | 15 - 19      | /                             |
|                                                | 20 - 24      | 580                           |
|                                                | 25 - 29      | 1 070                         |
|                                                | 30 - 34      | 1 200                         |
|                                                | 35 - 39      | 1 550                         |
| Männlich                                       | 40 - 44      | 1 850                         |
|                                                | 45 - 49      | 2 430                         |
|                                                | 50 - 54      | 2 440                         |
|                                                | 55 - 59      | 2 400                         |
|                                                | 60 - 64      | 2 760                         |
|                                                | 65 - 69      | 1 510                         |

Noch: Personen nach Alter (5er-Jahresgruppen), Höchster beruflicher Abschluss (ausführlich) und weitere Merkmale für Niedersachsen (Bundesland)

|                    |              | Niedersachsen<br>(Bundesland) |
|--------------------|--------------|-------------------------------|
|                    | 70 - 74      | 2 610                         |
|                    | 75 - 79      | 3 020                         |
|                    | 80 - 84      | 2 070                         |
|                    | 85 - 89      | 310                           |
|                    | 90 und älter | /                             |
|                    | Insgesamt    | 15 910                        |
|                    | Unter 5      | /                             |
|                    | 5 - 9        | /                             |
|                    | 10 - 14      | /                             |
|                    | 15 - 19      | /                             |
|                    | 20 - 24      | 440                           |
|                    | 25 - 29      | 460                           |
|                    | 30 - 34      | 680                           |
|                    | 35 - 39      | 710                           |
| Weiblich           | 40 - 44      | 850                           |
|                    | 45 - 49      | 900                           |
|                    | 50 - 54      | 930                           |
|                    | 55 - 59      | 1 550                         |
|                    | 60 - 64      | 1 450                         |
|                    | 65 - 69      | 1 290                         |
|                    | 70 - 74      | 1 670                         |
|                    | 75 - 79      | 2 240                         |
|                    | 80 - 84      | 1 660                         |
|                    | 85 - 89      | 630                           |
|                    | 90 und älter | 360                           |
|                    | Insgesamt    | 5 630                         |
|                    | Unter 5      | /                             |
|                    | 5 - 9        | /                             |
|                    | 10 - 14      | /                             |
|                    | 15 - 19      | /                             |
|                    | 20 - 24      | /                             |
|                    | 25 - 29      | /                             |
|                    | 30 - 34      | /                             |
|                    | 35 - 39      | /                             |
| Insgesamt          | 40 - 44      | 390                           |
|                    | 45 - 49      | 670                           |
|                    | 50 - 54      | 570                           |
|                    | 55 - 59      | 320                           |
| Fachschulabschluss | 60 - 64      | 610                           |
|                    | 65 - 69      | 510                           |
|                    | 70 - 74      | 470                           |
|                    | 75 - 79      | 320                           |
|                    | 80 - 84      | 500                           |
|                    | 85 - 89      | /                             |
|                    | 90 und älter | /                             |
|                    | Insgesamt    | 3 670                         |
|                    | Unter 5      | /                             |
|                    | 5 - 9        | /                             |
| Männlich           | 10 - 14      | /                             |
|                    | 15 - 19      | /                             |
|                    | 20 - 24      | /                             |
|                    | 25 - 29      | /                             |
|                    | 30 - 34      | /                             |

Noch: Personen nach Alter (5er-Jahresgruppen), Höchster beruflicher Abschluss (ausführlich) und weitere Merkmale für Niedersachsen (Bundesland)

|                                                  |              | Niedersachsen<br>(Bundesland) |
|--------------------------------------------------|--------------|-------------------------------|
|                                                  | 35 - 39      | /                             |
|                                                  | 40 - 44      | /                             |
|                                                  | 45 - 49      | /                             |
|                                                  | 50 - 54      | /                             |
|                                                  | 55 - 59      | /                             |
|                                                  | 60 - 64      | /                             |
|                                                  | 65 - 69      | /                             |
|                                                  | 70 - 74      | /                             |
|                                                  | 75 - 79      | /                             |
|                                                  | 80 - 84      | /                             |
|                                                  | 85 - 89      | /                             |
|                                                  | 90 und älter | /                             |
|                                                  | Insgesamt    | 1 970                         |
|                                                  | Unter 5      | /                             |
|                                                  | 5 - 9        | /                             |
|                                                  | 10 - 14      | /                             |
|                                                  | 15 - 19      | /                             |
|                                                  | 20 - 24      | /                             |
|                                                  | 25 - 29      | /                             |
|                                                  | 30 - 34      | /                             |
|                                                  | 35 - 39      | /                             |
| Weiblich                                         | 40 - 44      | /                             |
|                                                  | 45 - 49      | /                             |
|                                                  | 50 - 54      | /                             |
|                                                  | 55 - 59      | /                             |
|                                                  | 60 - 64      | /                             |
|                                                  | 65 - 69      | /                             |
|                                                  | 70 - 74      | /                             |
|                                                  | 75 - 79      | /                             |
|                                                  | 80 - 84      | /                             |
|                                                  | 85 - 89      | /                             |
|                                                  | 90 und älter | /                             |
|                                                  | Insgesamt    | /                             |
|                                                  | Unter 5      | /                             |
|                                                  | 5 - 9        | /                             |
|                                                  | 10 - 14      | /                             |
|                                                  | 15 - 19      | /                             |
|                                                  | 20 - 24      | /                             |
|                                                  | 25 - 29      | /                             |
|                                                  | 30 - 34      | /                             |
|                                                  | 35 - 39      | /                             |
|                                                  | 40 - 44      | /                             |
| Abschluss einer Fachakademie oder Berufsakademie | 45 - 49      | /                             |
|                                                  | 50 - 54      | /                             |
|                                                  | 55 - 59      | /                             |
|                                                  | 60 - 64      | /                             |
|                                                  | 65 - 69      | /                             |
|                                                  | 70 - 74      | /                             |
|                                                  | 75 - 79      | /                             |
|                                                  | 80 - 84      | /                             |
|                                                  | 85 - 89      | /                             |
|                                                  | 90 und älter | /                             |
|                                                  | Insgesamt    | /                             |
| Männlich                                         |              |                               |

Noch: Personen nach Alter (5er-Jahresgruppen), Höchster beruflicher Abschluss (ausführlich) und weitere Merkmale für Niedersachsen (Bundesland)

|                            | Niedersachsen<br>(Bundesland) |
|----------------------------|-------------------------------|
| Unter 5                    | /                             |
| 5 - 9                      | /                             |
| 10 - 14                    | /                             |
| 15 - 19                    | /                             |
| 20 - 24                    | /                             |
| 25 - 29                    | /                             |
| 30 - 34                    | /                             |
| 35 - 39                    | /                             |
| 40 - 44                    | /                             |
| 45 - 49                    | /                             |
| 50 - 54                    | /                             |
| 55 - 59                    | /                             |
| 60 - 64                    | /                             |
| 65 - 69                    | /                             |
| 70 - 74                    | /                             |
| 75 - 79                    | /                             |
| 80 - 84                    | /                             |
| 85 - 89                    | /                             |
| 90 und älter               | /                             |
| Insgesamt                  | /                             |
| Unter 5                    | /                             |
| 5 - 9                      | /                             |
| 10 - 14                    | /                             |
| 15 - 19                    | /                             |
| 20 - 24                    | /                             |
| 25 - 29                    | /                             |
| 30 - 34                    | /                             |
| 35 - 39                    | /                             |
| 40 - 44                    | /                             |
| Weiblich 45 - 49           | /                             |
| 50 - 54                    | /                             |
| 55 - 59                    | /                             |
| 60 - 64                    | /                             |
| 65 - 69                    | /                             |
| 70 - 74                    | /                             |
| 75 - 79                    | /                             |
| 80 - 84                    | /                             |
| 85 - 89                    | /                             |
| 90 und älter               | /                             |
| Insgesamt                  | /                             |
| Unter 5                    | /                             |
| 5 - 9                      | /                             |
| 10 - 14                    | /                             |
| 15 - 19                    | /                             |
| 20 - 24                    | /                             |
| 25 - 29                    | /                             |
| 30 - 34                    | /                             |
| 35 - 39                    | /                             |
| 40 - 44                    | /                             |
| 45 - 49                    | /                             |
| 50 - 54                    | /                             |
| 55 - 59                    | /                             |
| 60 - 64                    | /                             |
| Fachhochschulabschl<br>uss | /                             |
| Insgesamt                  | /                             |
| 30 - 34                    | /                             |
| 35 - 39                    | /                             |
| 40 - 44                    | /                             |
| 45 - 49                    | /                             |
| 50 - 54                    | /                             |
| 55 - 59                    | /                             |
| 60 - 64                    | /                             |

Noch: Personen nach Alter (5er-Jahresgruppen), Höchster beruflicher Abschluss (ausführlich) und weitere Merkmale für Niedersachsen (Bundesland)

|                    | Niedersachsen<br>(Bundesland) |
|--------------------|-------------------------------|
| 65 - 69            | /                             |
| 70 - 74            | /                             |
| 75 - 79            | /                             |
| 80 - 84            | /                             |
| 85 - 89            | /                             |
| 90 und älter       | /                             |
| Insgesamt          | /                             |
| Unter 5            | /                             |
| 5 - 9              | /                             |
| 10 - 14            | /                             |
| 15 - 19            | /                             |
| 20 - 24            | /                             |
| 25 - 29            | /                             |
| 30 - 34            | /                             |
| 35 - 39            | /                             |
| 40 - 44            | /                             |
| Männlich 45 - 49   | /                             |
| 50 - 54            | /                             |
| 55 - 59            | /                             |
| 60 - 64            | /                             |
| 65 - 69            | /                             |
| 70 - 74            | /                             |
| 75 - 79            | /                             |
| 80 - 84            | /                             |
| 85 - 89            | /                             |
| 90 und älter       | /                             |
| Insgesamt          | /                             |
| Unter 5            | /                             |
| 5 - 9              | /                             |
| 10 - 14            | /                             |
| 15 - 19            | /                             |
| 20 - 24            | /                             |
| 25 - 29            | /                             |
| 30 - 34            | /                             |
| 35 - 39            | /                             |
| 40 - 44            | /                             |
| Weiblich 45 - 49   | /                             |
| 50 - 54            | /                             |
| 55 - 59            | /                             |
| 60 - 64            | /                             |
| 65 - 69            | /                             |
| 70 - 74            | /                             |
| 75 - 79            | /                             |
| 80 - 84            | /                             |
| 85 - 89            | /                             |
| 90 und älter       | /                             |
| Insgesamt          | /                             |
| Unter 5            | /                             |
| 5 - 9              | /                             |
| 10 - 14            | /                             |
| 15 - 19            | /                             |
| 20 - 24            | /                             |
| 25 - 29            | /                             |
| Hochschulabschluss | /                             |
| Insgesamt          | /                             |

Noch: Personen nach Alter (5er-Jahresgruppen), Höchster beruflicher Abschluss (ausführlich) und weitere Merkmale für Niedersachsen (Bundesland)

|              |              | Niedersachsen<br>(Bundesland) |
|--------------|--------------|-------------------------------|
| Promotion    | Insgesamt    | /                             |
|              | Unter 5      | /                             |
|              | 5 - 9        | /                             |
|              | 10 - 14      | /                             |
|              | 15 - 19      | /                             |
|              | 20 - 24      | /                             |
|              | 25 - 29      | /                             |
|              | 30 - 34      | /                             |
|              | 35 - 39      | /                             |
|              | Insgesamt    | /                             |
|              | 40 - 44      | /                             |
|              | 45 - 49      | /                             |
|              | 50 - 54      | /                             |
|              | 55 - 59      | /                             |
|              | 60 - 64      | /                             |
|              | 65 - 69      | /                             |
|              | 70 - 74      | /                             |
|              | 75 - 79      | /                             |
|              | 80 - 84      | /                             |
|              | 85 - 89      | /                             |
|              | 90 und älter | /                             |
|              | Insgesamt    | /                             |
|              | Unter 5      | /                             |
|              | 5 - 9        | /                             |
|              | 10 - 14      | /                             |
|              | 15 - 19      | /                             |
|              | 20 - 24      | /                             |
|              | 25 - 29      | /                             |
|              | 30 - 34      | /                             |
|              | 35 - 39      | /                             |
| Männlich     | 40 - 44      | /                             |
| 45 - 49      | /            |                               |
| 50 - 54      | /            |                               |
| 55 - 59      | /            |                               |
| 60 - 64      | /            |                               |
| 65 - 69      | /            |                               |
| 70 - 74      | /            |                               |
| 75 - 79      | /            |                               |
| 80 - 84      | /            |                               |
| 85 - 89      | /            |                               |
| 90 und älter | /            |                               |
| Insgesamt    | /            |                               |
| Unter 5      | /            |                               |
| 5 - 9        | /            |                               |
| 10 - 14      | /            |                               |
| 15 - 19      | /            |                               |
| 20 - 24      | /            |                               |
| 25 - 29      | /            |                               |
| 30 - 34      | /            |                               |
| 35 - 39      | /            |                               |
| 40 - 44      | /            |                               |
| 45 - 49      | /            |                               |
| 50 - 54      | /            |                               |
| 55 - 59      | /            |                               |

Noch: Personen nach Alter (5er-Jahresgruppen), Höchster beruflicher Abschluss (ausführlich) und weitere Merkmale für Niedersachsen (Bundesland)

|           |              | Niedersachsen<br>(Bundesland) |
|-----------|--------------|-------------------------------|
|           | 60 - 64      | /                             |
|           | 65 - 69      | /                             |
|           | 70 - 74      | /                             |
|           | 75 - 79      | /                             |
|           | 80 - 84      | /                             |
|           | 85 - 89      | /                             |
|           | 90 und älter | /                             |
|           | Insgesamt    | 294 690                       |
|           | Unter 5      | /                             |
|           | 5 - 9        | /                             |
|           | 10 - 14      | /                             |
|           | 15 - 19      | 9 970                         |
|           | 20 - 24      | 17 060                        |
|           | 25 - 29      | 16 660                        |
|           | 30 - 34      | 19 290                        |
|           | 35 - 39      | 20 980                        |
| Insgesamt | 40 - 44      | 25 270                        |
|           | 45 - 49      | 28 750                        |
|           | 50 - 54      | 26 000                        |
|           | 55 - 59      | 20 610                        |
|           | 60 - 64      | 18 640                        |
|           | 65 - 69      | 16 080                        |
|           | 70 - 74      | 23 000                        |
|           | 75 - 79      | 25 120                        |
|           | 80 - 84      | 16 860                        |
|           | 85 - 89      | 7 050                         |
|           | 90 und älter | 3 330                         |
|           | Insgesamt    | 138 470                       |
|           | Unter 5      | /                             |
|           | 5 - 9        | /                             |
|           | 10 - 14      | /                             |
|           | 15 - 19      | 6 020                         |
|           | 20 - 24      | 9 630                         |
|           | 25 - 29      | 8 700                         |
|           | 30 - 34      | 10 070                        |
|           | 35 - 39      | 9 670                         |
| Männlich  | 40 - 44      | 12 670                        |
|           | 45 - 49      | 15 280                        |
|           | 50 - 54      | 13 720                        |
|           | 55 - 59      | 10 070                        |
|           | 60 - 64      | 8 650                         |
|           | 65 - 69      | 7 540                         |
|           | 70 - 74      | 9 770                         |
|           | 75 - 79      | 9 220                         |
|           | 80 - 84      | 5 390                         |
|           | 85 - 89      | 1 570                         |
|           | 90 und älter | 500                           |
|           | Insgesamt    | 156 220                       |
|           | Unter 5      | /                             |
|           | 5 - 9        | /                             |
|           | 10 - 14      | /                             |
|           | 15 - 19      | 3 960                         |
|           | 20 - 24      | 7 430                         |
| Weiblich  |              |                               |
|           |              |                               |
|           |              |                               |
|           |              |                               |
|           |              |                               |
|           |              |                               |
|           |              |                               |
|           |              |                               |
|           |              |                               |
|           |              |                               |

1.1 Ohne Schulabschluss

Insgesamt

Männlich

Weiblich

Noch: Personen nach Alter (5er-Jahresgruppen), Höchster beruflicher Abschluss (ausführlich) und weitere Merkmale für Niedersachsen (Bundesland)

|           |              | Niedersachsen<br>(Bundesland) |
|-----------|--------------|-------------------------------|
|           | 25 - 29      | 7 960                         |
|           | 30 - 34      | 9 220                         |
|           | 35 - 39      | 11 310                        |
|           | 40 - 44      | 12 600                        |
|           | 45 - 49      | 13 460                        |
|           | 50 - 54      | 12 270                        |
|           | 55 - 59      | 10 550                        |
|           | 60 - 64      | 9 990                         |
|           | 65 - 69      | 8 540                         |
|           | 70 - 74      | 13 230                        |
|           | 75 - 79      | 15 900                        |
|           | 80 - 84      | 11 470                        |
|           | 85 - 89      | 5 480                         |
|           | 90 und älter | 2 840                         |
|           | Insgesamt    | 247 850                       |
|           | Unter 5      | /                             |
|           | 5 - 9        | /                             |
|           | 10 - 14      | /                             |
|           | 15 - 19      | 9 780                         |
|           | 20 - 24      | 16 170                        |
|           | 25 - 29      | 14 970                        |
|           | 30 - 34      | 17 260                        |
|           | 35 - 39      | 18 450                        |
| Insgesamt | 40 - 44      | 22 190                        |
|           | 45 - 49      | 24 780                        |
|           | 50 - 54      | 22 070                        |
|           | 55 - 59      | 16 340                        |
|           | 60 - 64      | 13 820                        |
|           | 65 - 69      | 12 780                        |
|           | 70 - 74      | 18 260                        |
|           | 75 - 79      | 19 550                        |
|           | 80 - 84      | 12 630                        |
|           | 85 - 89      | 6 060                         |
|           | 90 und älter | 2 730                         |
|           | Insgesamt    | 109 200                       |
|           | Unter 5      | /                             |
|           | 5 - 9        | /                             |
|           | 10 - 14      | /                             |
|           | 15 - 19      | 5 880                         |
|           | 20 - 24      | 9 070                         |
|           | 25 - 29      | 7 540                         |
|           | 30 - 34      | 8 760                         |
|           | 35 - 39      | 7 920                         |
| Männlich  | 40 - 44      | 10 540                        |
|           | 45 - 49      | 12 410                        |
|           | 50 - 54      | 10 900                        |
|           | 55 - 59      | 7 460                         |
|           | 60 - 64      | 5 560                         |
|           | 65 - 69      | 5 720                         |
|           | 70 - 74      | 6 830                         |
|           | 75 - 79      | 5 990                         |
|           | 80 - 84      | 3 040                         |
|           | 85 - 89      | 1 220                         |

Ohne beruflichen  
Abschluss

Männlich

Noch: Personen nach Alter (5er-Jahresgruppen), Höchster beruflicher Abschluss (ausführlich) und weitere Merkmale für Niedersachsen (Bundesland)

|           |              | Niedersachsen<br>(Bundesland) |
|-----------|--------------|-------------------------------|
|           | 90 und älter | 360                           |
|           | Insgesamt    | 138 650                       |
|           | Unter 5      | /                             |
|           | 5 - 9        | /                             |
|           | 10 - 14      | /                             |
|           | 15 - 19      | 3 900                         |
|           | 20 - 24      | 7 100                         |
|           | 25 - 29      | 7 430                         |
|           | 30 - 34      | 8 500                         |
|           | 35 - 39      | 10 520                        |
| Weiblich  | 40 - 44      | 11 650                        |
|           | 45 - 49      | 12 370                        |
|           | 50 - 54      | 11 170                        |
|           | 55 - 59      | 8 890                         |
|           | 60 - 64      | 8 260                         |
|           | 65 - 69      | 7 050                         |
|           | 70 - 74      | 11 430                        |
|           | 75 - 79      | 13 560                        |
|           | 80 - 84      | 9 590                         |
|           | 85 - 89      | 4 850                         |
|           | 90 und älter | 2 380                         |
|           | Insgesamt    | 41 550                        |
|           | Unter 5      | /                             |
|           | 5 - 9        | /                             |
|           | 10 - 14      | /                             |
|           | 15 - 19      | /                             |
|           | 20 - 24      | 800                           |
|           | 25 - 29      | 1 440                         |
|           | 30 - 34      | 1 880                         |
|           | 35 - 39      | 2 240                         |
|           | 40 - 44      | 2 700                         |
| Insgesamt | 45 - 49      | 3 300                         |
|           | 50 - 54      | 3 360                         |
|           | 55 - 59      | 3 950                         |
|           | 60 - 64      | 4 210                         |
|           | 65 - 69      | 2 800                         |
|           | 70 - 74      | 4 280                         |
|           | 75 - 79      | 5 260                         |
|           | 80 - 84      | 3 730                         |
|           | 85 - 89      | 950                           |
|           | 90 und älter | 480                           |
|           | Insgesamt    | 25 820                        |
|           | Unter 5      | /                             |
|           | 5 - 9        | /                             |
|           | 10 - 14      | /                             |
|           | 15 - 19      | /                             |
|           | 20 - 24      | 480                           |
|           | 25 - 29      | 970                           |
|           | 30 - 34      | 1 200                         |
|           | 35 - 39      | 1 540                         |
|           | 40 - 44      | 1 850                         |
|           | 45 - 49      | 2 410                         |
|           | 50 - 54      | 2 440                         |

Lehre,  
Berufsausbildung im  
dualen System

Männlich

Noch: Personen nach Alter (5er-Jahresgruppen), Höchster beruflicher Abschluss (ausführlich) und weitere Merkmale für Niedersachsen (Bundesland)

|          |              | Niedersachsen<br>(Bundesland) |
|----------|--------------|-------------------------------|
|          | 55 - 59      | 2 400                         |
|          | 60 - 64      | 2 760                         |
|          | 65 - 69      | 1 510                         |
|          | 70 - 74      | 2 610                         |
|          | 75 - 79      | 3 020                         |
|          | 80 - 84      | 2 070                         |
|          | 85 - 89      | 310                           |
|          | 90 und älter | /                             |
|          | Insgesamt    | 15 740                        |
|          | Unter 5      | /                             |
|          | 5 - 9        | /                             |
|          | 10 - 14      | /                             |
|          | 15 - 19      | /                             |
|          | 20 - 24      | /                             |
|          | 25 - 29      | 460                           |
|          | 30 - 34      | 680                           |
|          | 35 - 39      | 710                           |
|          | 40 - 44      | 850                           |
| Weiblich | 45 - 49      | 890                           |
|          | 50 - 54      | 930                           |
|          | 55 - 59      | 1 550                         |
|          | 60 - 64      | 1 450                         |
|          | 65 - 69      | 1 290                         |
|          | 70 - 74      | 1 670                         |
|          | 75 - 79      | 2 240                         |
|          | 80 - 84      | 1 660                         |
|          | 85 - 89      | 630                           |
|          | 90 und älter | 360                           |
|          | Insgesamt    | 5 290                         |
|          | Unter 5      | /                             |
|          | 5 - 9        | /                             |
|          | 10 - 14      | /                             |
|          | 15 - 19      | /                             |
|          | 20 - 24      | /                             |
|          | 25 - 29      | /                             |
|          | 30 - 34      | /                             |
|          | 35 - 39      | /                             |
|          | 40 - 44      | 390                           |
|          | 45 - 49      | 670                           |
|          | 50 - 54      | 570                           |
|          | 55 - 59      | 320                           |
|          | 60 - 64      | 610                           |
|          | 65 - 69      | 510                           |
|          | 70 - 74      | 470                           |
|          | 75 - 79      | 320                           |
|          | 80 - 84      | 500                           |
|          | 85 - 89      | /                             |
|          | 90 und älter | /                             |
|          | Insgesamt    | 3 460                         |
|          | Unter 5      | /                             |
|          | 5 - 9        | /                             |
|          | 10 - 14      | /                             |
|          | 15 - 19      | /                             |

Weiblich

Insgesamt

Fachschulabschluss

Männlich

Noch: Personen nach Alter (5er-Jahresgruppen), Höchster beruflicher Abschluss (ausführlich) und weitere Merkmale für Niedersachsen (Bundesland)

|              | Niedersachsen<br>(Bundesland) |
|--------------|-------------------------------|
| 20 - 24      | /                             |
| 25 - 29      | /                             |
| 30 - 34      | /                             |
| 35 - 39      | /                             |
| 40 - 44      | /                             |
| 45 - 49      | /                             |
| 50 - 54      | /                             |
| 55 - 59      | /                             |
| 60 - 64      | /                             |
| 65 - 69      | /                             |
| 70 - 74      | /                             |
| 75 - 79      | /                             |
| 80 - 84      | /                             |
| 85 - 89      | /                             |
| 90 und älter | /                             |
| Insgesamt    | 1 830                         |
| Unter 5      | /                             |
| 5 - 9        | /                             |
| 10 - 14      | /                             |
| 15 - 19      | /                             |
| 20 - 24      | /                             |
| 25 - 29      | /                             |
| 30 - 34      | /                             |
| 35 - 39      | /                             |
| 40 - 44      | /                             |
| 45 - 49      | /                             |
| 50 - 54      | /                             |
| 55 - 59      | /                             |
| 60 - 64      | /                             |
| 65 - 69      | /                             |
| 70 - 74      | /                             |
| 75 - 79      | /                             |
| 80 - 84      | /                             |
| 85 - 89      | /                             |
| 90 und älter | /                             |
| Insgesamt    | /                             |
| Unter 5      | /                             |
| 5 - 9        | /                             |
| 10 - 14      | /                             |
| 15 - 19      | /                             |
| 20 - 24      | /                             |
| 25 - 29      | /                             |
| 30 - 34      | /                             |
| 35 - 39      | /                             |
| 40 - 44      | /                             |
| 45 - 49      | /                             |
| 50 - 54      | /                             |
| 55 - 59      | /                             |
| 60 - 64      | /                             |
| 65 - 69      | /                             |
| 70 - 74      | /                             |
| 75 - 79      | /                             |
| 80 - 84      | /                             |

Weiblich

Abschluss einer  
Fachakademie oder  
Berufsakademie

Insgesamt

Noch: Personen nach Alter (5er-Jahresgruppen), Höchster beruflicher Abschluss (ausführlich) und weitere Merkmale für Niedersachsen (Bundesland)

|              | Niedersachsen<br>(Bundesland) |
|--------------|-------------------------------|
| 85 - 89      | /                             |
| 90 und älter | /                             |
| Insgesamt    | /                             |
| Unter 5      | /                             |
| 5 - 9        | /                             |
| 10 - 14      | /                             |
| 15 - 19      | /                             |
| 20 - 24      | /                             |
| 25 - 29      | /                             |
| 30 - 34      | /                             |
| 35 - 39      | /                             |
| 40 - 44      | /                             |
| 45 - 49      | /                             |
| 50 - 54      | /                             |
| 55 - 59      | /                             |
| 60 - 64      | /                             |
| 65 - 69      | /                             |
| 70 - 74      | /                             |
| 75 - 79      | /                             |
| 80 - 84      | /                             |
| 85 - 89      | /                             |
| 90 und älter | /                             |
| Insgesamt    | /                             |
| Unter 5      | /                             |
| 5 - 9        | /                             |
| 10 - 14      | /                             |
| 15 - 19      | /                             |
| 20 - 24      | /                             |
| 25 - 29      | /                             |
| 30 - 34      | /                             |
| 35 - 39      | /                             |
| 40 - 44      | /                             |
| 45 - 49      | /                             |
| 50 - 54      | /                             |
| 55 - 59      | /                             |
| 60 - 64      | /                             |
| 65 - 69      | /                             |
| 70 - 74      | /                             |
| 75 - 79      | /                             |
| 80 - 84      | /                             |
| 85 - 89      | /                             |
| 90 und älter | /                             |
| Insgesamt    | /                             |
| Unter 5      | /                             |
| 5 - 9        | /                             |
| 10 - 14      | /                             |
| 15 - 19      | /                             |
| 20 - 24      | /                             |
| 25 - 29      | /                             |
| 30 - 34      | /                             |
| 35 - 39      | /                             |
| 40 - 44      | /                             |
| 45 - 49      | /                             |

Männlich

Weiblich

Fachhochschulabschl  
uss

Insgesamt

Noch: Personen nach Alter (5er-Jahresgruppen), Höchster beruflicher Abschluss (ausführlich) und weitere Merkmale für Niedersachsen (Bundesland)

|                          | Niedersachsen<br>(Bundesland) |
|--------------------------|-------------------------------|
| 50 - 54                  | /                             |
| 55 - 59                  | /                             |
| 60 - 64                  | /                             |
| 65 - 69                  | /                             |
| 70 - 74                  | /                             |
| 75 - 79                  | /                             |
| 80 - 84                  | /                             |
| 85 - 89                  | /                             |
| 90 und älter             | /                             |
| Insgesamt                | /                             |
| Unter 5                  | /                             |
| 5 - 9                    | /                             |
| 10 - 14                  | /                             |
| 15 - 19                  | /                             |
| 20 - 24                  | /                             |
| 25 - 29                  | /                             |
| 30 - 34                  | /                             |
| 35 - 39                  | /                             |
| 40 - 44                  | /                             |
| Männlich 45 - 49         | /                             |
| 50 - 54                  | /                             |
| 55 - 59                  | /                             |
| 60 - 64                  | /                             |
| 65 - 69                  | /                             |
| 70 - 74                  | /                             |
| 75 - 79                  | /                             |
| 80 - 84                  | /                             |
| 85 - 89                  | /                             |
| 90 und älter             | /                             |
| Insgesamt                | /                             |
| Unter 5                  | /                             |
| 5 - 9                    | /                             |
| 10 - 14                  | /                             |
| 15 - 19                  | /                             |
| 20 - 24                  | /                             |
| 25 - 29                  | /                             |
| 30 - 34                  | /                             |
| 35 - 39                  | /                             |
| Weiblich 40 - 44         | /                             |
| 45 - 49                  | /                             |
| 50 - 54                  | /                             |
| 55 - 59                  | /                             |
| 60 - 64                  | /                             |
| 65 - 69                  | /                             |
| 70 - 74                  | /                             |
| 75 - 79                  | /                             |
| 80 - 84                  | /                             |
| 85 - 89                  | /                             |
| 90 und älter             | /                             |
| Insgesamt                | /                             |
| Unter 5                  | /                             |
| Hochschulabschluss 5 - 9 | /                             |
| 10 - 14                  | /                             |

Noch: Personen nach Alter (5er-Jahresgruppen), Höchster beruflicher Abschluss (ausführlich) und weitere Merkmale für Niedersachsen (Bundesland)

|                  | Niedersachsen<br>(Bundesland) |
|------------------|-------------------------------|
| 15 - 19          | /                             |
| 20 - 24          | /                             |
| 25 - 29          | /                             |
| 30 - 34          | /                             |
| 35 - 39          | /                             |
| 40 - 44          | /                             |
| 45 - 49          | /                             |
| 50 - 54          | /                             |
| 55 - 59          | /                             |
| 60 - 64          | /                             |
| 65 - 69          | /                             |
| 70 - 74          | /                             |
| 75 - 79          | /                             |
| 80 - 84          | /                             |
| 85 - 89          | /                             |
| 90 und älter     | /                             |
| Insgesamt        | /                             |
| Unter 5          | /                             |
| 5 - 9            | /                             |
| 10 - 14          | /                             |
| 15 - 19          | /                             |
| 20 - 24          | /                             |
| 25 - 29          | /                             |
| 30 - 34          | /                             |
| 35 - 39          | /                             |
| Männlich 40 - 44 | /                             |
| 45 - 49          | /                             |
| 50 - 54          | /                             |
| 55 - 59          | /                             |
| 60 - 64          | /                             |
| 65 - 69          | /                             |
| 70 - 74          | /                             |
| 75 - 79          | /                             |
| 80 - 84          | /                             |
| 85 - 89          | /                             |
| 90 und älter     | /                             |
| Insgesamt        | /                             |
| Unter 5          | /                             |
| 5 - 9            | /                             |
| 10 - 14          | /                             |
| 15 - 19          | /                             |
| 20 - 24          | /                             |
| 25 - 29          | /                             |
| 30 - 34          | /                             |
| Weiblich 35 - 39 | /                             |
| 40 - 44          | /                             |
| 45 - 49          | /                             |
| 50 - 54          | /                             |
| 55 - 59          | /                             |
| 60 - 64          | /                             |
| 65 - 69          | /                             |
| 70 - 74          | /                             |
| 75 - 79          | /                             |

Noch: Personen nach Alter (5er-Jahresgruppen), Höchster beruflicher Abschluss (ausführlich) und weitere Merkmale für Niedersachsen (Bundesland)

|           |              | Niedersachsen<br>(Bundesland) |
|-----------|--------------|-------------------------------|
|           | 80 - 84      | /                             |
|           | 85 - 89      | /                             |
|           | 90 und älter | /                             |
|           | Insgesamt    | /                             |
|           | Unter 5      | /                             |
|           | 5 - 9        | /                             |
|           | 10 - 14      | /                             |
|           | 15 - 19      | /                             |
|           | 20 - 24      | /                             |
|           | 25 - 29      | /                             |
|           | 30 - 34      | /                             |
|           | 35 - 39      | /                             |
|           | 40 - 44      | /                             |
| Insgesamt | 45 - 49      | /                             |
|           | 50 - 54      | /                             |
|           | 55 - 59      | /                             |
|           | 60 - 64      | /                             |
|           | 65 - 69      | /                             |
|           | 70 - 74      | /                             |
|           | 75 - 79      | /                             |
|           | 80 - 84      | /                             |
|           | 85 - 89      | /                             |
|           | 90 und älter | /                             |
|           | Insgesamt    | /                             |
|           | Unter 5      | /                             |
|           | 5 - 9        | /                             |
|           | 10 - 14      | /                             |
| Promotion | 15 - 19      | /                             |
|           | 20 - 24      | /                             |
|           | 25 - 29      | /                             |
|           | 30 - 34      | /                             |
|           | 35 - 39      | /                             |
| Männlich  | 40 - 44      | /                             |
|           | 45 - 49      | /                             |
|           | 50 - 54      | /                             |
|           | 55 - 59      | /                             |
|           | 60 - 64      | /                             |
|           | 65 - 69      | /                             |
|           | 70 - 74      | /                             |
|           | 75 - 79      | /                             |
|           | 80 - 84      | /                             |
|           | 85 - 89      | /                             |
|           | 90 und älter | /                             |
|           | Insgesamt    | /                             |
|           | Unter 5      | /                             |
|           | 5 - 9        | /                             |
|           | 10 - 14      | /                             |
| Weiblich  | 15 - 19      | /                             |
|           | 20 - 24      | /                             |
|           | 25 - 29      | /                             |
|           | 30 - 34      | /                             |
|           | 35 - 39      | /                             |
|           | 40 - 44      | /                             |

Noch: Personen nach Alter (5er-Jahresgruppen), Höchster beruflicher Abschluss (ausführlich) und weitere Merkmale für Niedersachsen (Bundesland)

|                                    |              | Niedersachsen<br>(Bundesland) |
|------------------------------------|--------------|-------------------------------|
|                                    | 45 - 49      | /                             |
|                                    | 50 - 54      | /                             |
|                                    | 55 - 59      | /                             |
|                                    | 60 - 64      | /                             |
|                                    | 65 - 69      | /                             |
|                                    | 70 - 74      | /                             |
|                                    | 75 - 79      | /                             |
|                                    | 80 - 84      | /                             |
|                                    | 85 - 89      | /                             |
|                                    | 90 und älter | /                             |
|                                    | Insgesamt    | 192 820                       |
|                                    | Unter 5      | /                             |
|                                    | 5 - 9        | /                             |
|                                    | 10 - 14      | /                             |
|                                    | 15 - 19      | 189 080                       |
|                                    | 20 - 24      | 2 660                         |
|                                    | 25 - 29      | 500                           |
|                                    | 30 - 34      | /                             |
|                                    | 35 - 39      | /                             |
|                                    | 40 - 44      | /                             |
| Insgesamt                          | 45 - 49      | /                             |
|                                    | 50 - 54      | /                             |
|                                    | 55 - 59      | /                             |
|                                    | 60 - 64      | /                             |
|                                    | 65 - 69      | /                             |
|                                    | 70 - 74      | /                             |
|                                    | 75 - 79      | /                             |
|                                    | 80 - 84      | /                             |
|                                    | 85 - 89      | /                             |
|                                    | 90 und älter | /                             |
|                                    | Insgesamt    | 102 490                       |
| 1.2 Noch in schulischer Ausbildung | Unter 5      | /                             |
|                                    | 5 - 9        | /                             |
|                                    | 10 - 14      | /                             |
|                                    | 15 - 19      | 100 250                       |
|                                    | 20 - 24      | 1 610                         |
|                                    | 25 - 29      | /                             |
|                                    | 30 - 34      | /                             |
|                                    | 35 - 39      | /                             |
|                                    | 40 - 44      | /                             |
|                                    | 45 - 49      | /                             |
|                                    | 50 - 54      | /                             |
|                                    | 55 - 59      | /                             |
|                                    | 60 - 64      | /                             |
|                                    | 65 - 69      | /                             |
|                                    | 70 - 74      | /                             |
|                                    | 75 - 79      | /                             |
|                                    | 80 - 84      | /                             |
|                                    | 85 - 89      | /                             |
|                                    | 90 und älter | /                             |
|                                    | Insgesamt    | 90 330                        |
|                                    | Unter 5      | /                             |
|                                    | 5 - 9        | /                             |

Noch: Personen nach Alter (5er-Jahresgruppen), Höchster beruflicher Abschluss (ausführlich) und weitere Merkmale für Niedersachsen (Bundesland)

|              | Niedersachsen<br>(Bundesland) |
|--------------|-------------------------------|
| 10 - 14      | /                             |
| 15 - 19      | 88 840                        |
| 20 - 24      | 1 060                         |
| 25 - 29      | /                             |
| 30 - 34      | /                             |
| 35 - 39      | /                             |
| 40 - 44      | /                             |
| 45 - 49      | /                             |
| 50 - 54      | /                             |
| 55 - 59      | /                             |
| 60 - 64      | /                             |
| 65 - 69      | /                             |
| 70 - 74      | /                             |
| 75 - 79      | /                             |
| 80 - 84      | /                             |
| 85 - 89      | /                             |
| 90 und älter | /                             |
| Insgesamt    | 192 010                       |
| Unter 5      | /                             |
| 5 - 9        | /                             |
| 10 - 14      | /                             |
| 15 - 19      | 188 780                       |
| 20 - 24      | 2 340                         |
| 25 - 29      | 400                           |
| 30 - 34      | /                             |
| 35 - 39      | /                             |
| Insgesamt    | /                             |
| 40 - 44      | /                             |
| 45 - 49      | /                             |
| 50 - 54      | /                             |
| 55 - 59      | /                             |
| 60 - 64      | /                             |
| 65 - 69      | /                             |
| 70 - 74      | /                             |
| 75 - 79      | /                             |
| 80 - 84      | /                             |
| 85 - 89      | /                             |
| 90 und älter | /                             |
| Insgesamt    | 101 980                       |
| Unter 5      | /                             |
| 5 - 9        | /                             |
| 10 - 14      | /                             |
| 15 - 19      | 100 110                       |
| 20 - 24      | 1 410                         |
| 25 - 29      | /                             |
| 30 - 34      | /                             |
| Männlich     | /                             |
| 35 - 39      | /                             |
| 40 - 44      | /                             |
| 45 - 49      | /                             |
| 50 - 54      | /                             |
| 55 - 59      | /                             |
| 60 - 64      | /                             |
| 65 - 69      | /                             |
| 70 - 74      | /                             |

Noch: Personen nach Alter (5er-Jahresgruppen), Höchster beruflicher Abschluss (ausführlich) und weitere Merkmale für Niedersachsen (Bundesland)

|              | Niedersachsen<br>(Bundesland) |
|--------------|-------------------------------|
| 75 - 79      | /                             |
| 80 - 84      | /                             |
| 85 - 89      | /                             |
| 90 und älter | /                             |
| Insgesamt    | 90 030                        |
| Unter 5      | /                             |
| 5 - 9        | /                             |
| 10 - 14      | /                             |
| 15 - 19      | 88 670                        |
| 20 - 24      | 930                           |
| 25 - 29      | /                             |
| 30 - 34      | /                             |
| 35 - 39      | /                             |
| 40 - 44      | /                             |
| 45 - 49      | /                             |
| 50 - 54      | /                             |
| 55 - 59      | /                             |
| 60 - 64      | /                             |
| 65 - 69      | /                             |
| 70 - 74      | /                             |
| 75 - 79      | /                             |
| 80 - 84      | /                             |
| 85 - 89      | /                             |
| 90 und älter | /                             |
| Insgesamt    | 470                           |
| Unter 5      | /                             |
| 5 - 9        | /                             |
| 10 - 14      | /                             |
| 15 - 19      | /                             |
| 20 - 24      | /                             |
| 25 - 29      | /                             |
| 30 - 34      | /                             |
| 35 - 39      | /                             |
| 40 - 44      | /                             |
| 45 - 49      | /                             |
| 50 - 54      | /                             |
| 55 - 59      | /                             |
| 60 - 64      | /                             |
| 65 - 69      | /                             |
| 70 - 74      | /                             |
| 75 - 79      | /                             |
| 80 - 84      | /                             |
| 85 - 89      | /                             |
| 90 und älter | /                             |
| Insgesamt    | /                             |
| Unter 5      | /                             |
| 5 - 9        | /                             |
| 10 - 14      | /                             |
| 15 - 19      | /                             |
| 20 - 24      | /                             |
| 25 - 29      | /                             |
| 30 - 34      | /                             |
| 35 - 39      | /                             |
| Männlich     | /                             |

Noch: Personen nach Alter (5er-Jahresgruppen), Höchster beruflicher Abschluss (ausführlich) und weitere Merkmale für Niedersachsen (Bundesland)

|                    |              | Niedersachsen<br>(Bundesland) |
|--------------------|--------------|-------------------------------|
|                    | 40 - 44      | /                             |
|                    | 45 - 49      | /                             |
|                    | 50 - 54      | /                             |
|                    | 55 - 59      | /                             |
|                    | 60 - 64      | /                             |
|                    | 65 - 69      | /                             |
|                    | 70 - 74      | /                             |
|                    | 75 - 79      | /                             |
|                    | 80 - 84      | /                             |
|                    | 85 - 89      | /                             |
|                    | 90 und älter | /                             |
|                    | Insgesamt    | /                             |
|                    | Unter 5      | /                             |
|                    | 5 - 9        | /                             |
|                    | 10 - 14      | /                             |
|                    | 15 - 19      | /                             |
|                    | 20 - 24      | /                             |
|                    | 25 - 29      | /                             |
|                    | 30 - 34      | /                             |
|                    | 35 - 39      | /                             |
|                    | 40 - 44      | /                             |
| Weiblich           | 45 - 49      | /                             |
|                    | 50 - 54      | /                             |
|                    | 55 - 59      | /                             |
|                    | 60 - 64      | /                             |
|                    | 65 - 69      | /                             |
|                    | 70 - 74      | /                             |
|                    | 75 - 79      | /                             |
|                    | 80 - 84      | /                             |
|                    | 85 - 89      | /                             |
|                    | 90 und älter | /                             |
|                    | Insgesamt    | /                             |
|                    | Unter 5      | /                             |
|                    | 5 - 9        | /                             |
|                    | 10 - 14      | /                             |
|                    | 15 - 19      | /                             |
|                    | 20 - 24      | /                             |
|                    | 25 - 29      | /                             |
|                    | 30 - 34      | /                             |
|                    | 35 - 39      | /                             |
|                    | 40 - 44      | /                             |
| Insgesamt          | 45 - 49      | /                             |
| Fachschulabschluss | 50 - 54      | /                             |
|                    | 55 - 59      | /                             |
|                    | 60 - 64      | /                             |
|                    | 65 - 69      | /                             |
|                    | 70 - 74      | /                             |
|                    | 75 - 79      | /                             |
|                    | 80 - 84      | /                             |
|                    | 85 - 89      | /                             |
|                    | 90 und älter | /                             |
|                    | Insgesamt    | /                             |
| Männlich           | Unter 5      | /                             |

Noch: Personen nach Alter (5er-Jahresgruppen), Höchster beruflicher Abschluss (ausführlich) und weitere Merkmale für Niedersachsen (Bundesland)

|          |              | Niedersachsen<br>(Bundesland) |
|----------|--------------|-------------------------------|
|          | 5 - 9        | /                             |
|          | 10 - 14      | /                             |
|          | 15 - 19      | /                             |
|          | 20 - 24      | /                             |
|          | 25 - 29      | /                             |
|          | 30 - 34      | /                             |
|          | 35 - 39      | /                             |
|          | 40 - 44      | /                             |
|          | 45 - 49      | /                             |
|          | 50 - 54      | /                             |
|          | 55 - 59      | /                             |
|          | 60 - 64      | /                             |
|          | 65 - 69      | /                             |
|          | 70 - 74      | /                             |
|          | 75 - 79      | /                             |
|          | 80 - 84      | /                             |
|          | 85 - 89      | /                             |
|          | 90 und älter | /                             |
|          | Insgesamt    | /                             |
|          | Unter 5      | /                             |
|          | 5 - 9        | /                             |
|          | 10 - 14      | /                             |
|          | 15 - 19      | /                             |
|          | 20 - 24      | /                             |
|          | 25 - 29      | /                             |
|          | 30 - 34      | /                             |
|          | 35 - 39      | /                             |
|          | 40 - 44      | /                             |
| Weiblich | 45 - 49      | /                             |
|          | 50 - 54      | /                             |
|          | 55 - 59      | /                             |
|          | 60 - 64      | /                             |
|          | 65 - 69      | /                             |
|          | 70 - 74      | /                             |
|          | 75 - 79      | /                             |
|          | 80 - 84      | /                             |
|          | 85 - 89      | /                             |
|          | 90 und älter | /                             |
|          | Insgesamt    | /                             |
|          | Unter 5      | /                             |
|          | 5 - 9        | /                             |
|          | 10 - 14      | /                             |
|          | 15 - 19      | /                             |
|          | 20 - 24      | /                             |
|          | 25 - 29      | /                             |
|          | 30 - 34      | /                             |
|          | 35 - 39      | /                             |
|          | 40 - 44      | /                             |
|          | 45 - 49      | /                             |
|          | 50 - 54      | /                             |
|          | 55 - 59      | /                             |
|          | 60 - 64      | /                             |
|          | 65 - 69      | /                             |
|          | 70 - 74      | /                             |
|          | 75 - 79      | /                             |
|          | 80 - 84      | /                             |
|          | 85 - 89      | /                             |
|          | 90 und älter | /                             |
|          | Insgesamt    | /                             |
|          | Unter 5      | /                             |
|          | 5 - 9        | /                             |
|          | 10 - 14      | /                             |
|          | 15 - 19      | /                             |
|          | 20 - 24      | /                             |
|          | 25 - 29      | /                             |
|          | 30 - 34      | /                             |
|          | 35 - 39      | /                             |
|          | 40 - 44      | /                             |
|          | 45 - 49      | /                             |
|          | 50 - 54      | /                             |
|          | 55 - 59      | /                             |
|          | 60 - 64      | /                             |
|          | 65 - 69      | /                             |

Abschluss einer  
Fachakademie oder  
Berufsakademie

Insgesamt

Noch: Personen nach Alter (5er-Jahresgruppen), Höchster beruflicher Abschluss (ausführlich) und weitere Merkmale für Niedersachsen (Bundesland)

|                            |              | Niedersachsen<br>(Bundesland) |
|----------------------------|--------------|-------------------------------|
|                            | 70 - 74      | /                             |
|                            | 75 - 79      | /                             |
|                            | 80 - 84      | /                             |
|                            | 85 - 89      | /                             |
|                            | 90 und älter | /                             |
|                            | Insgesamt    | /                             |
|                            | Unter 5      | /                             |
|                            | 5 - 9        | /                             |
|                            | 10 - 14      | /                             |
|                            | 15 - 19      | /                             |
|                            | 20 - 24      | /                             |
|                            | 25 - 29      | /                             |
|                            | 30 - 34      | /                             |
|                            | 35 - 39      | /                             |
| Männlich                   | 40 - 44      | /                             |
|                            | 45 - 49      | /                             |
|                            | 50 - 54      | /                             |
|                            | 55 - 59      | /                             |
|                            | 60 - 64      | /                             |
|                            | 65 - 69      | /                             |
|                            | 70 - 74      | /                             |
|                            | 75 - 79      | /                             |
|                            | 80 - 84      | /                             |
|                            | 85 - 89      | /                             |
|                            | 90 und älter | /                             |
|                            | Insgesamt    | /                             |
|                            | Unter 5      | /                             |
|                            | 5 - 9        | /                             |
|                            | 10 - 14      | /                             |
|                            | 15 - 19      | /                             |
|                            | 20 - 24      | /                             |
|                            | 25 - 29      | /                             |
|                            | 30 - 34      | /                             |
|                            | 35 - 39      | /                             |
| Weiblich                   | 40 - 44      | /                             |
|                            | 45 - 49      | /                             |
|                            | 50 - 54      | /                             |
|                            | 55 - 59      | /                             |
|                            | 60 - 64      | /                             |
|                            | 65 - 69      | /                             |
|                            | 70 - 74      | /                             |
|                            | 75 - 79      | /                             |
|                            | 80 - 84      | /                             |
|                            | 85 - 89      | /                             |
|                            | 90 und älter | /                             |
|                            | Insgesamt    | /                             |
|                            | Unter 5      | /                             |
|                            | 5 - 9        | /                             |
| Fachhochschulabschl<br>uss | 10 - 14      | /                             |
| Insgesamt                  | 15 - 19      | /                             |
|                            | 20 - 24      | /                             |
|                            | 25 - 29      | /                             |
|                            | 30 - 34      | /                             |

Noch: Personen nach Alter (5er-Jahresgruppen), Höchster beruflicher Abschluss (ausführlich) und weitere Merkmale für Niedersachsen (Bundesland)

|                    |              | Niedersachsen<br>(Bundesland) |
|--------------------|--------------|-------------------------------|
|                    | 35 - 39      | /                             |
|                    | 40 - 44      | /                             |
|                    | 45 - 49      | /                             |
|                    | 50 - 54      | /                             |
|                    | 55 - 59      | /                             |
|                    | 60 - 64      | /                             |
|                    | 65 - 69      | /                             |
|                    | 70 - 74      | /                             |
|                    | 75 - 79      | /                             |
|                    | 80 - 84      | /                             |
|                    | 85 - 89      | /                             |
|                    | 90 und älter | /                             |
|                    | Insgesamt    | /                             |
|                    | Unter 5      | /                             |
|                    | 5 - 9        | /                             |
|                    | 10 - 14      | /                             |
|                    | 15 - 19      | /                             |
|                    | 20 - 24      | /                             |
|                    | 25 - 29      | /                             |
|                    | 30 - 34      | /                             |
|                    | 35 - 39      | /                             |
| Männlich           | 40 - 44      | /                             |
|                    | 45 - 49      | /                             |
|                    | 50 - 54      | /                             |
|                    | 55 - 59      | /                             |
|                    | 60 - 64      | /                             |
|                    | 65 - 69      | /                             |
|                    | 70 - 74      | /                             |
|                    | 75 - 79      | /                             |
|                    | 80 - 84      | /                             |
|                    | 85 - 89      | /                             |
|                    | 90 und älter | /                             |
|                    | Insgesamt    | /                             |
|                    | Unter 5      | /                             |
|                    | 5 - 9        | /                             |
|                    | 10 - 14      | /                             |
|                    | 15 - 19      | /                             |
|                    | 20 - 24      | /                             |
|                    | 25 - 29      | /                             |
|                    | 30 - 34      | /                             |
|                    | 35 - 39      | /                             |
| Weiblich           | 40 - 44      | /                             |
|                    | 45 - 49      | /                             |
|                    | 50 - 54      | /                             |
|                    | 55 - 59      | /                             |
|                    | 60 - 64      | /                             |
|                    | 65 - 69      | /                             |
|                    | 70 - 74      | /                             |
|                    | 75 - 79      | /                             |
|                    | 80 - 84      | /                             |
|                    | 85 - 89      | /                             |
|                    | 90 und älter | /                             |
|                    | Insgesamt    | /                             |
| Hochschulabschluss | Insgesamt    | /                             |

Noch: Personen nach Alter (5er-Jahresgruppen), Höchster beruflicher Abschluss (ausführlich) und weitere Merkmale für Niedersachsen (Bundesland)

|          |              | Niedersachsen<br>(Bundesland) |
|----------|--------------|-------------------------------|
|          | Unter 5      | /                             |
|          | 5 - 9        | /                             |
|          | 10 - 14      | /                             |
|          | 15 - 19      | /                             |
|          | 20 - 24      | /                             |
|          | 25 - 29      | /                             |
|          | 30 - 34      | /                             |
|          | 35 - 39      | /                             |
|          | 40 - 44      | /                             |
|          | 45 - 49      | /                             |
|          | 50 - 54      | /                             |
|          | 55 - 59      | /                             |
|          | 60 - 64      | /                             |
|          | 65 - 69      | /                             |
|          | 70 - 74      | /                             |
|          | 75 - 79      | /                             |
|          | 80 - 84      | /                             |
|          | 85 - 89      | /                             |
|          | 90 und älter | /                             |
|          | Insgesamt    | /                             |
|          | Unter 5      | /                             |
|          | 5 - 9        | /                             |
|          | 10 - 14      | /                             |
|          | 15 - 19      | /                             |
|          | 20 - 24      | /                             |
|          | 25 - 29      | /                             |
|          | 30 - 34      | /                             |
|          | 35 - 39      | /                             |
| Männlich | 40 - 44      | /                             |
|          | 45 - 49      | /                             |
|          | 50 - 54      | /                             |
|          | 55 - 59      | /                             |
|          | 60 - 64      | /                             |
|          | 65 - 69      | /                             |
|          | 70 - 74      | /                             |
|          | 75 - 79      | /                             |
|          | 80 - 84      | /                             |
|          | 85 - 89      | /                             |
|          | 90 und älter | /                             |
|          | Insgesamt    | /                             |
|          | Unter 5      | /                             |
|          | 5 - 9        | /                             |
|          | 10 - 14      | /                             |
|          | 15 - 19      | /                             |
|          | 20 - 24      | /                             |
|          | 25 - 29      | /                             |
|          | 30 - 34      | /                             |
|          | 35 - 39      | /                             |
|          | 40 - 44      | /                             |
|          | 45 - 49      | /                             |
|          | 50 - 54      | /                             |
|          | 55 - 59      | /                             |
|          | 60 - 64      | /                             |
| Weiblich | 65 - 69      | /                             |
|          | 70 - 74      | /                             |
|          | 75 - 79      | /                             |
|          | 80 - 84      | /                             |
|          | 85 - 89      | /                             |
|          | 90 und älter | /                             |
|          | Insgesamt    | /                             |
|          | Unter 5      | /                             |
|          | 5 - 9        | /                             |
|          | 10 - 14      | /                             |
|          | 15 - 19      | /                             |
|          | 20 - 24      | /                             |
|          | 25 - 29      | /                             |
|          | 30 - 34      | /                             |
|          | 35 - 39      | /                             |
|          | 40 - 44      | /                             |
|          | 45 - 49      | /                             |
|          | 50 - 54      | /                             |
|          | 55 - 59      | /                             |
|          | 60 - 64      | /                             |

Noch: Personen nach Alter (5er-Jahresgruppen), Höchster beruflicher Abschluss (ausführlich) und weitere Merkmale für Niedersachsen (Bundesland)

|  |              | Niedersachsen<br>(Bundesland) |
|--|--------------|-------------------------------|
|  | 65 - 69      | /                             |
|  | 70 - 74      | /                             |
|  | 75 - 79      | /                             |
|  | 80 - 84      | /                             |
|  | 85 - 89      | /                             |
|  | 90 und älter | /                             |
|  | Insgesamt    | /                             |
|  | Unter 5      | /                             |
|  | 5 - 9        | /                             |
|  | 10 - 14      | /                             |
|  | 15 - 19      | /                             |
|  | 20 - 24      | /                             |
|  | 25 - 29      | /                             |
|  | 30 - 34      | /                             |
|  | 35 - 39      | /                             |
|  | 40 - 44      | /                             |
|  | 45 - 49      | /                             |
|  | 50 - 54      | /                             |
|  | 55 - 59      | /                             |
|  | 60 - 64      | /                             |
|  | 65 - 69      | /                             |
|  | 70 - 74      | /                             |
|  | 75 - 79      | /                             |
|  | 80 - 84      | /                             |
|  | 85 - 89      | /                             |
|  | 90 und älter | /                             |
|  | Insgesamt    | /                             |
|  | Unter 5      | /                             |
|  | 5 - 9        | /                             |
|  | 10 - 14      | /                             |
|  | 15 - 19      | /                             |
|  | 20 - 24      | /                             |
|  | 25 - 29      | /                             |
|  | 30 - 34      | /                             |
|  | 35 - 39      | /                             |
|  | 40 - 44      | /                             |
|  | 45 - 49      | /                             |
|  | 50 - 54      | /                             |
|  | 55 - 59      | /                             |
|  | 60 - 64      | /                             |
|  | 65 - 69      | /                             |
|  | 70 - 74      | /                             |
|  | 75 - 79      | /                             |
|  | 80 - 84      | /                             |
|  | 85 - 89      | /                             |
|  | 90 und älter | /                             |
|  | Insgesamt    | /                             |
|  | Unter 5      | /                             |
|  | 5 - 9        | /                             |
|  | 10 - 14      | /                             |
|  | 15 - 19      | /                             |
|  | 20 - 24      | /                             |
|  | 25 - 29      | /                             |
|  | 30 - 34      | /                             |
|  | 35 - 39      | /                             |
|  | 40 - 44      | /                             |
|  | 45 - 49      | /                             |
|  | 50 - 54      | /                             |
|  | 55 - 59      | /                             |
|  | 60 - 64      | /                             |
|  | 65 - 69      | /                             |
|  | 70 - 74      | /                             |
|  | 75 - 79      | /                             |
|  | 80 - 84      | /                             |
|  | 85 - 89      | /                             |
|  | 90 und älter | /                             |
|  | Insgesamt    | /                             |
|  | Unter 5      | /                             |
|  | 5 - 9        | /                             |
|  | 10 - 14      | /                             |
|  | 15 - 19      | /                             |
|  | 20 - 24      | /                             |
|  | 25 - 29      | /                             |

Noch: Personen nach Alter (5er-Jahresgruppen), Höchster beruflicher Abschluss (ausführlich) und weitere Merkmale für Niedersachsen (Bundesland)

|                               |           |              | Niedersachsen<br>(Bundesland) |
|-------------------------------|-----------|--------------|-------------------------------|
| 2 Haupt-/ Volksschulabschluss | Insgesamt | 30 - 34      | /                             |
|                               |           | 35 - 39      | /                             |
|                               |           | 40 - 44      | /                             |
|                               |           | 45 - 49      | /                             |
|                               |           | 50 - 54      | /                             |
|                               |           | 55 - 59      | /                             |
|                               |           | 60 - 64      | /                             |
|                               |           | 65 - 69      | /                             |
|                               |           | 70 - 74      | /                             |
|                               |           | 75 - 79      | /                             |
|                               |           | 80 - 84      | /                             |
|                               |           | 85 - 89      | /                             |
|                               |           | 90 und älter | /                             |
|                               |           | Insgesamt    | 2 438 040                     |
|                               |           | Unter 5      | /                             |
|                               |           | 5 - 9        | /                             |
|                               |           | 10 - 14      | /                             |
|                               |           | 15 - 19      | 30 150                        |
|                               |           | 20 - 24      | 64 610                        |
|                               |           | 25 - 29      | 62 400                        |
|                               |           | 30 - 34      | 69 870                        |
|                               |           | 35 - 39      | 96 630                        |
|                               |           | 40 - 44      | 157 170                       |
|                               |           | 45 - 49      | 195 210                       |
|                               |           | 50 - 54      | 218 780                       |
|                               |           | 55 - 59      | 235 170                       |
|                               |           | 60 - 64      | 250 250                       |
|                               |           | 65 - 69      | 240 010                       |
|                               |           | 70 - 74      | 318 760                       |
|                               |           | 75 - 79      | 213 290                       |
|                               |           | 80 - 84      | 157 320                       |
|                               |           | 85 - 89      | 92 510                        |
|                               |           | 90 und älter | 35 910                        |
|                               |           | Insgesamt    | 1 190 810                     |
|                               |           | Unter 5      | /                             |
|                               |           | 5 - 9        | /                             |
|                               |           | 10 - 14      | /                             |
|                               |           | 15 - 19      | 19 030                        |
|                               |           | 20 - 24      | 41 090                        |
|                               |           | 25 - 29      | 38 130                        |
|                               |           | 30 - 34      | 41 900                        |
|                               |           | 35 - 39      | 57 190                        |
| Insgesamt                     | Männlich  | 40 - 44      | 92 840                        |
|                               |           | 45 - 49      | 116 710                       |
|                               |           | 50 - 54      | 118 270                       |
|                               |           | 55 - 59      | 116 220                       |
|                               |           | 60 - 64      | 117 970                       |
|                               |           | 65 - 69      | 110 540                       |
|                               |           | 70 - 74      | 143 440                       |
|                               |           | 75 - 79      | 90 170                        |
|                               |           | 80 - 84      | 55 840                        |
|                               |           | 85 - 89      | 25 080                        |
|                               |           | 90 und älter | 6 390                         |

Noch: Personen nach Alter (5er-Jahresgruppen), Höchster beruflicher Abschluss (ausführlich) und weitere Merkmale für Niedersachsen (Bundesland)

|                               |           |              | Niedersachsen<br>(Bundesland) |
|-------------------------------|-----------|--------------|-------------------------------|
| 2 Haupt-/ Volksschulabschluss | Insgesamt | Insgesamt    | 1 247 230                     |
|                               |           | Unter 5      | /                             |
|                               |           | 5 - 9        | /                             |
|                               |           | 10 - 14      | /                             |
|                               |           | 15 - 19      | 11 130                        |
|                               |           | 20 - 24      | 23 520                        |
|                               |           | 25 - 29      | 24 280                        |
|                               |           | 30 - 34      | 27 960                        |
|                               |           | 35 - 39      | 39 440                        |
|                               |           | 40 - 44      | 64 330                        |
|                               |           | 45 - 49      | 78 500                        |
|                               |           | 50 - 54      | 100 510                       |
|                               |           | 55 - 59      | 118 950                       |
|                               |           | 60 - 64      | 132 280                       |
|                               |           | 65 - 69      | 129 460                       |
|                               |           | 70 - 74      | 175 320                       |
|                               |           | 75 - 79      | 123 120                       |
|                               |           | 80 - 84      | 101 480                       |
|                               |           | 85 - 89      | 67 430                        |
|                               |           | 90 und älter | 29 530                        |
|                               |           | Insgesamt    | 778 850                       |
|                               |           | Unter 5      | /                             |
|                               |           | 5 - 9        | /                             |
|                               |           | 10 - 14      | /                             |
|                               |           | 15 - 19      | 27 320                        |
|                               |           | 20 - 24      | 40 190                        |
|                               |           | 25 - 29      | 27 960                        |
|                               |           | 30 - 34      | 26 370                        |
|                               |           | 35 - 39      | 26 550                        |
|                               |           | 40 - 44      | 39 800                        |
|                               |           | 45 - 49      | 49 460                        |
|                               |           | 50 - 54      | 52 630                        |
|                               |           | 55 - 59      | 49 060                        |
|                               |           | 60 - 64      | 51 580                        |
|                               |           | 65 - 69      | 56 120                        |
|                               |           | 70 - 74      | 103 050                       |
|                               |           | 75 - 79      | 92 290                        |
|                               |           | 80 - 84      | 73 590                        |
|                               |           | 85 - 89      | 43 370                        |
|                               |           | 90 und älter | 19 520                        |
|                               |           | Insgesamt    | 252 650                       |
|                               |           | Unter 5      | /                             |
|                               |           | 5 - 9        | /                             |
|                               |           | 10 - 14      | /                             |
|                               |           | 15 - 19      | 17 000                        |
|                               |           | 20 - 24      | 23 480                        |
|                               |           | 25 - 29      | 14 940                        |
|                               |           | 30 - 34      | 12 690                        |
|                               |           | 35 - 39      | 13 400                        |
|                               |           | 40 - 44      | 17 770                        |
|                               |           | 45 - 49      | 23 210                        |
|                               |           | 50 - 54      | 20 680                        |
|                               |           | 55 - 59      | 17 160                        |

Noch: Personen nach Alter (5er-Jahresgruppen), Höchster beruflicher Abschluss (ausführlich) und weitere Merkmale für Niedersachsen (Bundesland)

|              | Niedersachsen<br>(Bundesland) |
|--------------|-------------------------------|
| 60 - 64      | 14 790                        |
| 65 - 69      | 14 310                        |
| 70 - 74      | 24 050                        |
| 75 - 79      | 18 680                        |
| 80 - 84      | 12 980                        |
| 85 - 89      | 5 890                         |
| 90 und älter | 1 620                         |
| Insgesamt    | 526 190                       |
| Unter 5      | /                             |
| 5 - 9        | /                             |
| 10 - 14      | /                             |
| 15 - 19      | 10 330                        |
| 20 - 24      | 16 710                        |
| 25 - 29      | 13 020                        |
| 30 - 34      | 13 680                        |
| 35 - 39      | 13 140                        |
| 40 - 44      | 22 030                        |
| 45 - 49      | 26 250                        |
| 50 - 54      | 31 960                        |
| 55 - 59      | 31 900                        |
| 60 - 64      | 36 780                        |
| 65 - 69      | 41 810                        |
| 70 - 74      | 79 000                        |
| 75 - 79      | 73 600                        |
| 80 - 84      | 60 610                        |
| 85 - 89      | 37 480                        |
| 90 und älter | 17 900                        |
| Insgesamt    | 1 496 130                     |
| Unter 5      | /                             |
| 5 - 9        | /                             |
| 10 - 14      | /                             |
| 15 - 19      | 2 600                         |
| 20 - 24      | 23 120                        |
| 25 - 29      | 32 550                        |
| 30 - 34      | 40 600                        |
| 35 - 39      | 65 050                        |
| 40 - 44      | 107 380                       |
| 45 - 49      | 133 250                       |
| 50 - 54      | 150 080                       |
| 55 - 59      | 167 470                       |
| 60 - 64      | 177 940                       |
| 65 - 69      | 162 690                       |
| 70 - 74      | 190 300                       |
| 75 - 79      | 107 320                       |
| 80 - 84      | 75 890                        |
| 85 - 89      | 44 760                        |
| 90 und älter | 15 140                        |
| Insgesamt    | 831 590                       |
| Unter 5      | /                             |
| 5 - 9        | /                             |
| 10 - 14      | /                             |
| 15 - 19      | 1 950                         |
| 20 - 24      | 17 050                        |

Weiblich

Insgesamt

Lehre,  
Berufsausbildung im  
dualen System

Männlich

Noch: Personen nach Alter (5er-Jahresgruppen), Höchster beruflicher Abschluss (ausführlich) und weitere Merkmale für Niedersachsen (Bundesland)

|              | Niedersachsen<br>(Bundesland) |
|--------------|-------------------------------|
| 25 - 29      | 22 240                        |
| 30 - 34      | 27 510                        |
| 35 - 39      | 40 590                        |
| 40 - 44      | 68 040                        |
| 45 - 49      | 84 410                        |
| 50 - 54      | 87 230                        |
| 55 - 59      | 87 470                        |
| 60 - 64      | 89 670                        |
| 65 - 69      | 82 200                        |
| 70 - 74      | 101 830                       |
| 75 - 79      | 62 120                        |
| 80 - 84      | 37 900                        |
| 85 - 89      | 17 140                        |
| 90 und älter | 4 260                         |
| Insgesamt    | 664 540                       |
| Unter 5      | /                             |
| 5 - 9        | /                             |
| 10 - 14      | /                             |
| 15 - 19      | 660                           |
| 20 - 24      | 6 060                         |
| 25 - 29      | 10 310                        |
| 30 - 34      | 13 090                        |
| 35 - 39      | 24 460                        |
| 40 - 44      | 39 340                        |
| 45 - 49      | 48 840                        |
| 50 - 54      | 62 850                        |
| 55 - 59      | 80 000                        |
| 60 - 64      | 88 270                        |
| 65 - 69      | 80 490                        |
| 70 - 74      | 88 470                        |
| 75 - 79      | 45 200                        |
| 80 - 84      | 37 980                        |
| 85 - 89      | 27 620                        |
| 90 und älter | 10 880                        |
| Insgesamt    | 163 060                       |
| Unter 5      | /                             |
| 5 - 9        | /                             |
| 10 - 14      | /                             |
| 15 - 19      | /                             |
| 20 - 24      | 1 310                         |
| 25 - 29      | 1 900                         |
| 30 - 34      | 2 890                         |
| 35 - 39      | 5 030                         |
| 40 - 44      | 9 980                         |
| 45 - 49      | 12 500                        |
| 50 - 54      | 16 070                        |
| 55 - 59      | 18 640                        |
| 60 - 64      | 20 740                        |
| 65 - 69      | 21 190                        |
| 70 - 74      | 25 410                        |
| 75 - 79      | 13 680                        |
| 80 - 84      | 7 850                         |
| 85 - 89      | 4 390                         |

Weiblich

Fachschulabschluss Insgesamt

Noch: Personen nach Alter (5er-Jahresgruppen), Höchster beruflicher Abschluss (ausführlich) und weitere Merkmale für Niedersachsen (Bundesland)

|          |                                                  | Niedersachsen<br>(Bundesland) |
|----------|--------------------------------------------------|-------------------------------|
|          | 90 und älter                                     | 1 250                         |
|          | Insgesamt                                        | 106 570                       |
|          | Unter 5                                          | /                             |
|          | 5 - 9                                            | /                             |
|          | 10 - 14                                          | /                             |
|          | 15 - 19                                          | /                             |
|          | 20 - 24                                          | 560                           |
|          | 25 - 29                                          | 950                           |
|          | 30 - 34                                          | 1 710                         |
|          | 35 - 39                                          | 3 200                         |
|          | 40 - 44                                          | 7 030                         |
|          | 45 - 49                                          | 9 090                         |
|          | 50 - 54                                          | 10 360                        |
|          | 55 - 59                                          | 11 590                        |
|          | 60 - 64                                          | 13 510                        |
|          | 65 - 69                                          | 14 040                        |
|          | 70 - 74                                          | 17 560                        |
|          | 75 - 79                                          | 9 370                         |
|          | 80 - 84                                          | 4 960                         |
|          | 85 - 89                                          | 2 050                         |
| Männlich | 90 und älter                                     | 500                           |
|          | Insgesamt                                        | 56 490                        |
|          | Unter 5                                          | /                             |
|          | 5 - 9                                            | /                             |
|          | 10 - 14                                          | /                             |
|          | 15 - 19                                          | /                             |
|          | 20 - 24                                          | 750                           |
|          | 25 - 29                                          | 950                           |
|          | 30 - 34                                          | 1 190                         |
|          | 35 - 39                                          | 1 830                         |
|          | 40 - 44                                          | 2 950                         |
|          | 45 - 49                                          | 3 400                         |
|          | 50 - 54                                          | 5 710                         |
|          | 55 - 59                                          | 7 050                         |
|          | 60 - 64                                          | 7 230                         |
|          | 65 - 69                                          | 7 160                         |
|          | 70 - 74                                          | 7 850                         |
|          | 75 - 79                                          | 4 320                         |
|          | 80 - 84                                          | 2 890                         |
|          | 85 - 89                                          | 2 330                         |
| Weiblich | 90 und älter                                     | 740                           |
|          | Insgesamt                                        | /                             |
|          | Unter 5                                          | /                             |
|          | 5 - 9                                            | /                             |
|          | 10 - 14                                          | /                             |
|          | 15 - 19                                          | /                             |
|          | 20 - 24                                          | /                             |
|          | 25 - 29                                          | /                             |
|          | 30 - 34                                          | /                             |
|          | 35 - 39                                          | /                             |
|          | 40 - 44                                          | /                             |
|          | 45 - 49                                          | /                             |
|          | 50 - 54                                          | /                             |
|          | Abschluss einer Fachakademie oder Berufsakademie | Insgesamt                     |
|          | 20 - 24                                          | /                             |
|          | 25 - 29                                          | /                             |
|          | 30 - 34                                          | /                             |
|          | 35 - 39                                          | /                             |
|          | 40 - 44                                          | /                             |
|          | 45 - 49                                          | /                             |
|          | 50 - 54                                          | /                             |

Noch: Personen nach Alter (5er-Jahresgruppen), Höchster beruflicher Abschluss (ausführlich) und weitere Merkmale für Niedersachsen (Bundesland)

|                        |              | Niedersachsen<br>(Bundesland) |
|------------------------|--------------|-------------------------------|
|                        | 55 - 59      | /                             |
|                        | 60 - 64      | /                             |
|                        | 65 - 69      | /                             |
|                        | 70 - 74      | /                             |
|                        | 75 - 79      | /                             |
|                        | 80 - 84      | /                             |
|                        | 85 - 89      | /                             |
|                        | 90 und älter | /                             |
|                        | Insgesamt    | /                             |
|                        | Unter 5      | /                             |
|                        | 5 - 9        | /                             |
|                        | 10 - 14      | /                             |
|                        | 15 - 19      | /                             |
|                        | 20 - 24      | /                             |
|                        | 25 - 29      | /                             |
|                        | 30 - 34      | /                             |
|                        | 35 - 39      | /                             |
|                        | 40 - 44      | /                             |
|                        | 45 - 49      | /                             |
|                        | 50 - 54      | /                             |
| Männlich               | 55 - 59      | /                             |
|                        | 60 - 64      | /                             |
|                        | 65 - 69      | /                             |
|                        | 70 - 74      | /                             |
|                        | 75 - 79      | /                             |
|                        | 80 - 84      | /                             |
|                        | 85 - 89      | /                             |
|                        | 90 und älter | /                             |
|                        | Insgesamt    | /                             |
|                        | Unter 5      | /                             |
|                        | 5 - 9        | /                             |
|                        | 10 - 14      | /                             |
|                        | 15 - 19      | /                             |
|                        | 20 - 24      | /                             |
|                        | 25 - 29      | /                             |
|                        | 30 - 34      | /                             |
|                        | 35 - 39      | /                             |
|                        | 40 - 44      | /                             |
|                        | 45 - 49      | /                             |
|                        | 50 - 54      | /                             |
| Weiblich               | 55 - 59      | /                             |
|                        | 60 - 64      | /                             |
|                        | 65 - 69      | /                             |
|                        | 70 - 74      | /                             |
|                        | 75 - 79      | /                             |
|                        | 80 - 84      | /                             |
|                        | 85 - 89      | /                             |
|                        | 90 und älter | /                             |
|                        | Insgesamt    | /                             |
|                        | Unter 5      | /                             |
|                        | 5 - 9        | /                             |
|                        | 10 - 14      | /                             |
|                        | 15 - 19      | /                             |
|                        | 20 - 24      | /                             |
|                        | 25 - 29      | /                             |
|                        | 30 - 34      | /                             |
|                        | 35 - 39      | /                             |
|                        | 40 - 44      | /                             |
|                        | 45 - 49      | /                             |
|                        | 50 - 54      | /                             |
|                        | 55 - 59      | /                             |
| Fachhochschulabschluss | 60 - 64      | /                             |
|                        | 65 - 69      | /                             |
|                        | 70 - 74      | /                             |
|                        | 75 - 79      | /                             |
|                        | 80 - 84      | /                             |
|                        | 85 - 89      | /                             |
|                        | 90 und älter | /                             |
|                        | Insgesamt    | /                             |
|                        | Unter 5      | /                             |
|                        | 5 - 9        | /                             |
|                        | 10 - 14      | /                             |
|                        | 15 - 19      | /                             |
|                        | Insgesamt    | /                             |
|                        | Unter 5      | /                             |
|                        | 5 - 9        | /                             |
|                        | 10 - 14      | /                             |
|                        | 15 - 19      | /                             |

Noch: Personen nach Alter (5er-Jahresgruppen), Höchster beruflicher Abschluss (ausführlich) und weitere Merkmale für Niedersachsen (Bundesland)

|              | Niedersachsen<br>(Bundesland) |
|--------------|-------------------------------|
| 20 - 24      | /                             |
| 25 - 29      | /                             |
| 30 - 34      | /                             |
| 35 - 39      | /                             |
| 40 - 44      | /                             |
| 45 - 49      | /                             |
| 50 - 54      | /                             |
| 55 - 59      | /                             |
| 60 - 64      | /                             |
| 65 - 69      | /                             |
| 70 - 74      | /                             |
| 75 - 79      | /                             |
| 80 - 84      | /                             |
| 85 - 89      | /                             |
| 90 und älter | /                             |
| Insgesamt    | /                             |
| Unter 5      | /                             |
| 5 - 9        | /                             |
| 10 - 14      | /                             |
| 15 - 19      | /                             |
| 20 - 24      | /                             |
| 25 - 29      | /                             |
| 30 - 34      | /                             |
| 35 - 39      | /                             |
| 40 - 44      | /                             |
| 45 - 49      | /                             |
| 50 - 54      | /                             |
| 55 - 59      | /                             |
| 60 - 64      | /                             |
| 65 - 69      | /                             |
| 70 - 74      | /                             |
| 75 - 79      | /                             |
| 80 - 84      | /                             |
| 85 - 89      | /                             |
| 90 und älter | /                             |
| Insgesamt    | /                             |
| Unter 5      | /                             |
| 5 - 9        | /                             |
| 10 - 14      | /                             |
| 15 - 19      | /                             |
| 20 - 24      | /                             |
| 25 - 29      | /                             |
| 30 - 34      | /                             |
| 35 - 39      | /                             |
| 40 - 44      | /                             |
| 45 - 49      | /                             |
| 50 - 54      | /                             |
| 55 - 59      | /                             |
| 60 - 64      | /                             |
| 65 - 69      | /                             |
| 70 - 74      | /                             |
| 75 - 79      | /                             |
| 80 - 84      | /                             |

Männlich

Weiblich

Noch: Personen nach Alter (5er-Jahresgruppen), Höchster beruflicher Abschluss (ausführlich) und weitere Merkmale für Niedersachsen (Bundesland)

|              | Niedersachsen<br>(Bundesland) |
|--------------|-------------------------------|
| 85 - 89      | /                             |
| 90 und älter | /                             |
| Insgesamt    | /                             |
| Unter 5      | /                             |
| 5 - 9        | /                             |
| 10 - 14      | /                             |
| 15 - 19      | /                             |
| 20 - 24      | /                             |
| 25 - 29      | /                             |
| 30 - 34      | /                             |
| 35 - 39      | /                             |
| 40 - 44      | /                             |
| 45 - 49      | /                             |
| 50 - 54      | /                             |
| 55 - 59      | /                             |
| 60 - 64      | /                             |
| 65 - 69      | /                             |
| 70 - 74      | /                             |
| 75 - 79      | /                             |
| 80 - 84      | /                             |
| 85 - 89      | /                             |
| 90 und älter | /                             |
| Insgesamt    | /                             |
| Unter 5      | /                             |
| 5 - 9        | /                             |
| 10 - 14      | /                             |
| 15 - 19      | /                             |
| 20 - 24      | /                             |
| 25 - 29      | /                             |
| 30 - 34      | /                             |
| 35 - 39      | /                             |
| 40 - 44      | /                             |
| 45 - 49      | /                             |
| 50 - 54      | /                             |
| 55 - 59      | /                             |
| 60 - 64      | /                             |
| 65 - 69      | /                             |
| 70 - 74      | /                             |
| 75 - 79      | /                             |
| 80 - 84      | /                             |
| 85 - 89      | /                             |
| 90 und älter | /                             |
| Insgesamt    | /                             |
| Unter 5      | /                             |
| 5 - 9        | /                             |
| 10 - 14      | /                             |
| 15 - 19      | /                             |
| 20 - 24      | /                             |
| 25 - 29      | /                             |
| 30 - 34      | /                             |
| 35 - 39      | /                             |
| 40 - 44      | /                             |
| 45 - 49      | /                             |

Insgesamt

Hochschulabschluss

Männlich

Weiblich

Noch: Personen nach Alter (5er-Jahresgruppen), Höchster beruflicher Abschluss (ausführlich) und weitere Merkmale für Niedersachsen (Bundesland)

|           |              | Niedersachsen<br>(Bundesland) |   |
|-----------|--------------|-------------------------------|---|
|           |              | 50 - 54                       | / |
|           |              | 55 - 59                       | / |
|           |              | 60 - 64                       | / |
|           |              | 65 - 69                       | / |
|           |              | 70 - 74                       | / |
|           |              | 75 - 79                       | / |
|           |              | 80 - 84                       | / |
|           |              | 85 - 89                       | / |
|           |              | 90 und älter                  | / |
|           |              | Insgesamt                     | / |
|           |              | Unter 5                       | / |
|           |              | 5 - 9                         | / |
|           |              | 10 - 14                       | / |
|           |              | 15 - 19                       | / |
|           |              | 20 - 24                       | / |
|           |              | 25 - 29                       | / |
|           |              | 30 - 34                       | / |
|           |              | 35 - 39                       | / |
|           | Insgesamt    | 40 - 44                       | / |
|           |              | 45 - 49                       | / |
|           |              | 50 - 54                       | / |
|           |              | 55 - 59                       | / |
|           |              | 60 - 64                       | / |
|           |              | 65 - 69                       | / |
|           |              | 70 - 74                       | / |
|           |              | 75 - 79                       | / |
|           |              | 80 - 84                       | / |
|           | 85 - 89      | /                             |   |
|           | 90 und älter | /                             |   |
|           | Insgesamt    | /                             |   |
| Promotion | Unter 5      | /                             |   |
|           | 5 - 9        | /                             |   |
|           | 10 - 14      | /                             |   |
|           | 15 - 19      | /                             |   |
|           | 20 - 24      | /                             |   |
|           | 25 - 29      | /                             |   |
|           | 30 - 34      | /                             |   |
|           | 35 - 39      | /                             |   |
|           | 40 - 44      | /                             |   |
| Männlich  | 45 - 49      | /                             |   |
|           | 50 - 54      | /                             |   |
|           | 55 - 59      | /                             |   |
|           | 60 - 64      | /                             |   |
|           | 65 - 69      | /                             |   |
|           | 70 - 74      | /                             |   |
|           | 75 - 79      | /                             |   |
|           | 80 - 84      | /                             |   |
|           | 85 - 89      | /                             |   |
|           | 90 und älter | /                             |   |
|           | Insgesamt    | /                             |   |
|           | Unter 5      | /                             |   |
| Weiblich  | 5 - 9        | /                             |   |
|           | 10 - 14      | /                             |   |

|                                                     |              | Niedersachsen<br>(Bundesland) |
|-----------------------------------------------------|--------------|-------------------------------|
|                                                     | 15 - 19      | /                             |
|                                                     | 20 - 24      | /                             |
|                                                     | 25 - 29      | /                             |
|                                                     | 30 - 34      | /                             |
|                                                     | 35 - 39      | /                             |
|                                                     | 40 - 44      | /                             |
|                                                     | 45 - 49      | /                             |
|                                                     | 50 - 54      | /                             |
|                                                     | 55 - 59      | /                             |
|                                                     | 60 - 64      | /                             |
|                                                     | 65 - 69      | /                             |
|                                                     | 70 - 74      | /                             |
|                                                     | 75 - 79      | /                             |
|                                                     | 80 - 84      | /                             |
|                                                     | 85 - 89      | /                             |
|                                                     | 90 und älter | /                             |
|                                                     | Insgesamt    | 2 057 220                     |
|                                                     | Unter 5      | /                             |
|                                                     | 5 - 9        | /                             |
|                                                     | 10 - 14      | /                             |
|                                                     | 15 - 19      | 192 750                       |
|                                                     | 20 - 24      | 190 580                       |
|                                                     | 25 - 29      | 167 230                       |
|                                                     | 30 - 34      | 166 060                       |
|                                                     | 35 - 39      | 178 590                       |
|                                                     | 40 - 44      | 248 420                       |
| Insgesamt                                           | 45 - 49      | 252 520                       |
|                                                     | 50 - 54      | 185 480                       |
|                                                     | 55 - 59      | 128 450                       |
|                                                     | 60 - 64      | 95 490                        |
|                                                     | 65 - 69      | 80 290                        |
|                                                     | 70 - 74      | 73 540                        |
|                                                     | 75 - 79      | 44 600                        |
|                                                     | 80 - 84      | 28 360                        |
| 3 Mittlerer Schulabschluss und gymnasiale Oberstufe | 85 - 89      | 16 750                        |
|                                                     | 90 und älter | 8 110                         |
|                                                     | Insgesamt    | 905 180                       |
|                                                     | Unter 5      | /                             |
|                                                     | 5 - 9        | /                             |
|                                                     | 10 - 14      | /                             |
|                                                     | 15 - 19      | 91 930                        |
|                                                     | 20 - 24      | 99 290                        |
|                                                     | 25 - 29      | 83 280                        |
|                                                     | 30 - 34      | 78 930                        |
| Männlich                                            | 35 - 39      | 77 350                        |
|                                                     | 40 - 44      | 104 210                       |
|                                                     | 45 - 49      | 103 540                       |
|                                                     | 50 - 54      | 77 950                        |
|                                                     | 55 - 59      | 53 420                        |
|                                                     | 60 - 64      | 41 130                        |
|                                                     | 65 - 69      | 32 470                        |
|                                                     | 70 - 74      | 28 240                        |
|                                                     | 75 - 79      | 17 390                        |

Noch: Personen nach Alter (5er-Jahresgruppen), Höchster beruflicher Abschluss (ausführlich) und weitere Merkmale für Niedersachsen (Bundesland)

|                            | Niedersachsen<br>(Bundesland) |
|----------------------------|-------------------------------|
| 80 - 84                    | 10 500                        |
| 85 - 89                    | 4 160                         |
| 90 und älter               | 1 390                         |
| Insgesamt                  | 1 152 040                     |
| Unter 5                    | /                             |
| 5 - 9                      | /                             |
| 10 - 14                    | /                             |
| 15 - 19                    | 100 820                       |
| 20 - 24                    | 91 290                        |
| 25 - 29                    | 83 950                        |
| 30 - 34                    | 87 130                        |
| 35 - 39                    | 101 240                       |
| 40 - 44                    | 144 210                       |
| Weiblich                   |                               |
| 45 - 49                    | 148 980                       |
| 50 - 54                    | 107 530                       |
| 55 - 59                    | 75 020                        |
| 60 - 64                    | 54 360                        |
| 65 - 69                    | 47 810                        |
| 70 - 74                    | 45 300                        |
| 75 - 79                    | 27 220                        |
| 80 - 84                    | 17 860                        |
| 85 - 89                    | 12 600                        |
| 90 und älter               | 6 730                         |
| Insgesamt                  | 452 650                       |
| Unter 5                    | /                             |
| 5 - 9                      | /                             |
| 10 - 14                    | /                             |
| 15 - 19                    | 182 160                       |
| 20 - 24                    | 71 030                        |
| 25 - 29                    | 22 310                        |
| 30 - 34                    | 19 820                        |
| 35 - 39                    | 19 710                        |
| 40 - 44                    | 24 080                        |
| Insgesamt                  |                               |
| 45 - 49                    | 27 150                        |
| 50 - 54                    | 22 700                        |
| 55 - 59                    | 15 140                        |
| 60 - 64                    | 10 520                        |
| 65 - 69                    | 8 470                         |
| Ohne beruflichen Abschluss |                               |
| 70 - 74                    | 8 860                         |
| 75 - 79                    | 7 260                         |
| 80 - 84                    | 6 800                         |
| 85 - 89                    | 4 460                         |
| 90 und älter               | 2 160                         |
| Insgesamt                  | 191 470                       |
| Unter 5                    | /                             |
| 5 - 9                      | /                             |
| 10 - 14                    | /                             |
| Männlich                   |                               |
| 15 - 19                    | 86 570                        |
| 20 - 24                    | 35 760                        |
| 25 - 29                    | 10 600                        |
| 30 - 34                    | 8 340                         |
| 35 - 39                    | 7 660                         |
| 40 - 44                    | 8 570                         |

Noch: Personen nach Alter (5er-Jahresgruppen), Höchster beruflicher Abschluss (ausführlich) und weitere Merkmale für Niedersachsen (Bundesland)

|              | Niedersachsen<br>(Bundesland) |
|--------------|-------------------------------|
| 45 - 49      | 10 330                        |
| 50 - 54      | 8 760                         |
| 55 - 59      | 4 750                         |
| 60 - 64      | 3 080                         |
| 65 - 69      | 1 870                         |
| 70 - 74      | 2 000                         |
| 75 - 79      | 1 200                         |
| 80 - 84      | 1 210                         |
| 85 - 89      | 650                           |
| 90 und älter | /                             |
| Insgesamt    | 261 170                       |
| Unter 5      | /                             |
| 5 - 9        | /                             |
| 10 - 14      | /                             |
| 15 - 19      | 95 590                        |
| 20 - 24      | 35 270                        |
| 25 - 29      | 11 710                        |
| 30 - 34      | 11 480                        |
| 35 - 39      | 12 050                        |
| 40 - 44      | 15 510                        |
| Weiblich     |                               |
| 45 - 49      | 16 830                        |
| 50 - 54      | 13 940                        |
| 55 - 59      | 10 390                        |
| 60 - 64      | 7 440                         |
| 65 - 69      | 6 600                         |
| 70 - 74      | 6 860                         |
| 75 - 79      | 6 060                         |
| 80 - 84      | 5 590                         |
| 85 - 89      | 3 810                         |
| 90 und älter | 2 030                         |
| Insgesamt    | 1 283 550                     |
| Unter 5      | /                             |
| 5 - 9        | /                             |
| 10 - 14      | /                             |
| 15 - 19      | 8 700                         |
| 20 - 24      | 104 990                       |
| 25 - 29      | 124 790                       |
| 30 - 34      | 122 990                       |
| 35 - 39      | 130 130                       |
| 40 - 44      | 181 770                       |
| Insgesamt    |                               |
| 45 - 49      | 175 310                       |
| 50 - 54      | 121 740                       |
| 55 - 59      | 86 530                        |
| 60 - 64      | 63 050                        |
| 65 - 69      | 54 640                        |
| 70 - 74      | 48 950                        |
| 75 - 79      | 28 780                        |
| 80 - 84      | 16 410                        |
| 85 - 89      | 9 790                         |
| 90 und älter | 4 970                         |
| Insgesamt    | 574 180                       |
| Männlich     |                               |
| Unter 5      | /                             |
| 5 - 9        | /                             |

Lehre,  
Berufsausbildung im  
dualen System

Noch: Personen nach Alter (5er-Jahresgruppen), Höchster beruflicher Abschluss (ausführlich) und weitere Merkmale für Niedersachsen (Bundesland)

|              | Niedersachsen<br>(Bundesland) |
|--------------|-------------------------------|
| 10 - 14      | /                             |
| 15 - 19      | 4 920                         |
| 20 - 24      | 58 670                        |
| 25 - 29      | 65 500                        |
| 30 - 34      | 60 860                        |
| 35 - 39      | 58 020                        |
| 40 - 44      | 75 590                        |
| 45 - 49      | 70 570                        |
| 50 - 54      | 51 490                        |
| 55 - 59      | 37 370                        |
| 60 - 64      | 27 250                        |
| 65 - 69      | 21 940                        |
| 70 - 74      | 18 960                        |
| 75 - 79      | 12 290                        |
| 80 - 84      | 6 840                         |
| 85 - 89      | 2 810                         |
| 90 und älter | 1 110                         |
| Insgesamt    | 709 370                       |
| Unter 5      | /                             |
| 5 - 9        | /                             |
| 10 - 14      | /                             |
| 15 - 19      | 3 780                         |
| 20 - 24      | 46 330                        |
| 25 - 29      | 59 290                        |
| 30 - 34      | 62 130                        |
| 35 - 39      | 72 120                        |
| 40 - 44      | 106 180                       |
| 45 - 49      | 104 740                       |
| 50 - 54      | 70 260                        |
| 55 - 59      | 49 160                        |
| 60 - 64      | 35 800                        |
| 65 - 69      | 32 700                        |
| 70 - 74      | 29 980                        |
| 75 - 79      | 16 490                        |
| 80 - 84      | 9 570                         |
| 85 - 89      | 6 980                         |
| 90 und älter | 3 860                         |
| Insgesamt    | 321 030                       |
| Unter 5      | /                             |
| 5 - 9        | /                             |
| 10 - 14      | /                             |
| 15 - 19      | 1 890                         |
| 20 - 24      | 14 550                        |
| 25 - 29      | 20 130                        |
| 30 - 34      | 23 250                        |
| 35 - 39      | 28 750                        |
| 40 - 44      | 42 580                        |
| 45 - 49      | 50 060                        |
| 50 - 54      | 41 040                        |
| 55 - 59      | 26 770                        |
| 60 - 64      | 21 910                        |
| 65 - 69      | 17 170                        |
| 70 - 74      | 15 730                        |

Fachschulabschluss Insgesamt

Noch: Personen nach Alter (5er-Jahresgruppen), Höchster beruflicher Abschluss (ausführlich) und weitere Merkmale für Niedersachsen (Bundesland)

|              | Niedersachsen<br>(Bundesland) |
|--------------|-------------------------------|
| 75 - 79      | 8 570                         |
| 80 - 84      | 5 150                         |
| 85 - 89      | 2 500                         |
| 90 und älter | 980                           |
| Insgesamt    | 139 540                       |
| Unter 5      | /                             |
| 5 - 9        | /                             |
| 10 - 14      | /                             |
| 15 - 19      | 450                           |
| 20 - 24      | 4 860                         |
| 25 - 29      | 7 180                         |
| 30 - 34      | 9 730                         |
| 35 - 39      | 11 680                        |
| 40 - 44      | 20 060                        |
| 45 - 49      | 22 640                        |
| 50 - 54      | 17 710                        |
| 55 - 59      | 11 290                        |
| 60 - 64      | 10 790                        |
| 65 - 69      | 8 660                         |
| 70 - 74      | 7 280                         |
| 75 - 79      | 3 910                         |
| 80 - 84      | 2 460                         |
| 85 - 89      | 690                           |
| 90 und älter | /                             |
| Insgesamt    | 181 490                       |
| Unter 5      | /                             |
| 5 - 9        | /                             |
| 10 - 14      | /                             |
| 15 - 19      | 1 450                         |
| 20 - 24      | 9 690                         |
| 25 - 29      | 12 950                        |
| 30 - 34      | 13 510                        |
| 35 - 39      | 17 070                        |
| 40 - 44      | 22 520                        |
| 45 - 49      | 27 420                        |
| 50 - 54      | 23 330                        |
| 55 - 59      | 15 480                        |
| 60 - 64      | 11 120                        |
| 65 - 69      | 8 510                         |
| 70 - 74      | 8 460                         |
| 75 - 79      | 4 660                         |
| 80 - 84      | 2 690                         |
| 85 - 89      | 1 810                         |
| 90 und älter | 830                           |
| Insgesamt    | /                             |
| Unter 5      | /                             |
| 5 - 9        | /                             |
| 10 - 14      | /                             |
| 15 - 19      | /                             |
| 20 - 24      | /                             |
| 25 - 29      | /                             |
| 30 - 34      | /                             |
| 35 - 39      | /                             |

Männlich

Weiblich

Abschluss einer  
Fachakademie oder  
Berufsakademie

Insgesamt

Noch: Personen nach Alter (5er-Jahresgruppen), Höchster beruflicher Abschluss (ausführlich) und weitere Merkmale für Niedersachsen (Bundesland)

|                            |              | Niedersachsen<br>(Bundesland) |
|----------------------------|--------------|-------------------------------|
|                            | 40 - 44      | /                             |
|                            | 45 - 49      | /                             |
|                            | 50 - 54      | /                             |
|                            | 55 - 59      | /                             |
|                            | 60 - 64      | /                             |
|                            | 65 - 69      | /                             |
|                            | 70 - 74      | /                             |
|                            | 75 - 79      | /                             |
|                            | 80 - 84      | /                             |
|                            | 85 - 89      | /                             |
|                            | 90 und älter | /                             |
|                            | Insgesamt    | /                             |
|                            | Unter 5      | /                             |
|                            | 5 - 9        | /                             |
|                            | 10 - 14      | /                             |
|                            | 15 - 19      | /                             |
|                            | 20 - 24      | /                             |
|                            | 25 - 29      | /                             |
|                            | 30 - 34      | /                             |
|                            | 35 - 39      | /                             |
| Männlich                   | 40 - 44      | /                             |
|                            | 45 - 49      | /                             |
|                            | 50 - 54      | /                             |
|                            | 55 - 59      | /                             |
|                            | 60 - 64      | /                             |
|                            | 65 - 69      | /                             |
|                            | 70 - 74      | /                             |
|                            | 75 - 79      | /                             |
|                            | 80 - 84      | /                             |
|                            | 85 - 89      | /                             |
|                            | 90 und älter | /                             |
|                            | Insgesamt    | /                             |
|                            | Unter 5      | /                             |
|                            | 5 - 9        | /                             |
|                            | 10 - 14      | /                             |
|                            | 15 - 19      | /                             |
|                            | 20 - 24      | /                             |
|                            | 25 - 29      | /                             |
|                            | 30 - 34      | /                             |
|                            | 35 - 39      | /                             |
| Weiblich                   | 40 - 44      | /                             |
|                            | 45 - 49      | /                             |
|                            | 50 - 54      | /                             |
|                            | 55 - 59      | /                             |
|                            | 60 - 64      | /                             |
|                            | 65 - 69      | /                             |
|                            | 70 - 74      | /                             |
|                            | 75 - 79      | /                             |
|                            | 80 - 84      | /                             |
|                            | 85 - 89      | /                             |
|                            | 90 und älter | /                             |
| Fachhochschulabschl<br>uss | Insgesamt    | /                             |
|                            | Unter 5      | /                             |

Noch: Personen nach Alter (5er-Jahresgruppen), Höchster beruflicher Abschluss (ausführlich) und weitere Merkmale für Niedersachsen (Bundesland)

|          |              | Niedersachsen<br>(Bundesland) |
|----------|--------------|-------------------------------|
|          | 5 - 9        | /                             |
|          | 10 - 14      | /                             |
|          | 15 - 19      | /                             |
|          | 20 - 24      | /                             |
|          | 25 - 29      | /                             |
|          | 30 - 34      | /                             |
|          | 35 - 39      | /                             |
|          | 40 - 44      | /                             |
|          | 45 - 49      | /                             |
|          | 50 - 54      | /                             |
|          | 55 - 59      | /                             |
|          | 60 - 64      | /                             |
|          | 65 - 69      | /                             |
|          | 70 - 74      | /                             |
|          | 75 - 79      | /                             |
|          | 80 - 84      | /                             |
|          | 85 - 89      | /                             |
|          | 90 und älter | /                             |
|          | Insgesamt    | /                             |
|          | Unter 5      | /                             |
|          | 5 - 9        | /                             |
|          | 10 - 14      | /                             |
|          | 15 - 19      | /                             |
|          | 20 - 24      | /                             |
|          | 25 - 29      | /                             |
|          | 30 - 34      | /                             |
|          | 35 - 39      | /                             |
| Männlich | 40 - 44      | /                             |
|          | 45 - 49      | /                             |
|          | 50 - 54      | /                             |
|          | 55 - 59      | /                             |
|          | 60 - 64      | /                             |
|          | 65 - 69      | /                             |
|          | 70 - 74      | /                             |
|          | 75 - 79      | /                             |
|          | 80 - 84      | /                             |
|          | 85 - 89      | /                             |
|          | 90 und älter | /                             |
|          | Insgesamt    | /                             |
|          | Unter 5      | /                             |
|          | 5 - 9        | /                             |
|          | 10 - 14      | /                             |
|          | 15 - 19      | /                             |
|          | 20 - 24      | /                             |
|          | 25 - 29      | /                             |
|          | 30 - 34      | /                             |
|          | 35 - 39      | /                             |
| Weiblich | 40 - 44      | /                             |
|          | 45 - 49      | /                             |
|          | 50 - 54      | /                             |
|          | 55 - 59      | /                             |
|          | 60 - 64      | /                             |
|          | 65 - 69      | /                             |

Noch: Personen nach Alter (5er-Jahresgruppen), Höchster beruflicher Abschluss (ausführlich) und weitere Merkmale für Niedersachsen (Bundesland)

|              | Niedersachsen<br>(Bundesland) |
|--------------|-------------------------------|
| 70 - 74      | /                             |
| 75 - 79      | /                             |
| 80 - 84      | /                             |
| 85 - 89      | /                             |
| 90 und älter | /                             |
| Insgesamt    | /                             |
| Unter 5      | /                             |
| 5 - 9        | /                             |
| 10 - 14      | /                             |
| 15 - 19      | /                             |
| 20 - 24      | /                             |
| 25 - 29      | /                             |
| 30 - 34      | /                             |
| 35 - 39      | /                             |
| 40 - 44      | /                             |
| Insgesamt    | /                             |
| 45 - 49      | /                             |
| 50 - 54      | /                             |
| 55 - 59      | /                             |
| 60 - 64      | /                             |
| 65 - 69      | /                             |
| 70 - 74      | /                             |
| 75 - 79      | /                             |
| 80 - 84      | /                             |
| 85 - 89      | /                             |
| 90 und älter | /                             |
| Insgesamt    | /                             |
| Unter 5      | /                             |
| 5 - 9        | /                             |
| 10 - 14      | /                             |
| 15 - 19      | /                             |
| 20 - 24      | /                             |
| 25 - 29      | /                             |
| 30 - 34      | /                             |
| 35 - 39      | /                             |
| 40 - 44      | /                             |
| 45 - 49      | /                             |
| 50 - 54      | /                             |
| 55 - 59      | /                             |
| 60 - 64      | /                             |
| 65 - 69      | /                             |
| 70 - 74      | /                             |
| 75 - 79      | /                             |
| 80 - 84      | /                             |
| 85 - 89      | /                             |
| 90 und älter | /                             |
| Insgesamt    | /                             |
| Unter 5      | /                             |
| 5 - 9        | /                             |
| 10 - 14      | /                             |
| 15 - 19      | /                             |
| 20 - 24      | /                             |
| 25 - 29      | /                             |
| 30 - 34      | /                             |
| 35 - 39      | /                             |
| 40 - 44      | /                             |
| 45 - 49      | /                             |
| 50 - 54      | /                             |
| 55 - 59      | /                             |
| 60 - 64      | /                             |
| 65 - 69      | /                             |
| 70 - 74      | /                             |
| 75 - 79      | /                             |
| 80 - 84      | /                             |
| 85 - 89      | /                             |
| 90 und älter | /                             |
| Insgesamt    | /                             |
| Unter 5      | /                             |
| 5 - 9        | /                             |
| 10 - 14      | /                             |
| 15 - 19      | /                             |
| 20 - 24      | /                             |
| 25 - 29      | /                             |
| 30 - 34      | /                             |

Noch: Personen nach Alter (5er-Jahresgruppen), Höchster beruflicher Abschluss (ausführlich) und weitere Merkmale für Niedersachsen (Bundesland)

|              | Niedersachsen<br>(Bundesland) |
|--------------|-------------------------------|
| 35 - 39      | /                             |
| 40 - 44      | /                             |
| 45 - 49      | /                             |
| 50 - 54      | /                             |
| 55 - 59      | /                             |
| 60 - 64      | /                             |
| 65 - 69      | /                             |
| 70 - 74      | /                             |
| 75 - 79      | /                             |
| 80 - 84      | /                             |
| 85 - 89      | /                             |
| 90 und älter | /                             |
| Insgesamt    | /                             |
| Unter 5      | /                             |
| 5 - 9        | /                             |
| 10 - 14      | /                             |
| 15 - 19      | /                             |
| 20 - 24      | /                             |
| 25 - 29      | /                             |
| 30 - 34      | /                             |
| 35 - 39      | /                             |
| 40 - 44      | /                             |
| 45 - 49      | /                             |
| 50 - 54      | /                             |
| 55 - 59      | /                             |
| 60 - 64      | /                             |
| 65 - 69      | /                             |
| 70 - 74      | /                             |
| 75 - 79      | /                             |
| 80 - 84      | /                             |
| 85 - 89      | /                             |
| 90 und älter | /                             |
| Insgesamt    | /                             |
| Unter 5      | /                             |
| 5 - 9        | /                             |
| 10 - 14      | /                             |
| 15 - 19      | /                             |
| 20 - 24      | /                             |
| 25 - 29      | /                             |
| 30 - 34      | /                             |
| 35 - 39      | /                             |
| 40 - 44      | /                             |
| 45 - 49      | /                             |
| 50 - 54      | /                             |
| 55 - 59      | /                             |
| 60 - 64      | /                             |
| 65 - 69      | /                             |
| 70 - 74      | /                             |
| 75 - 79      | /                             |
| 80 - 84      | /                             |
| 85 - 89      | /                             |
| 90 und älter | /                             |
| Insgesamt    | /                             |
| Unter 5      | /                             |
| 5 - 9        | /                             |
| 10 - 14      | /                             |
| 15 - 19      | /                             |
| 20 - 24      | /                             |
| 25 - 29      | /                             |
| 30 - 34      | /                             |
| 35 - 39      | /                             |
| 40 - 44      | /                             |
| 45 - 49      | /                             |
| 50 - 54      | /                             |
| 55 - 59      | /                             |
| 60 - 64      | /                             |
| 65 - 69      | /                             |
| 70 - 74      | /                             |
| 75 - 79      | /                             |
| 80 - 84      | /                             |
| 85 - 89      | /                             |
| 90 und älter | /                             |
| Insgesamt    | /                             |

Noch: Personen nach Alter (5er-Jahresgruppen), Höchster beruflicher Abschluss (ausführlich) und weitere Merkmale für Niedersachsen (Bundesland)

|                                              |           |              | Niedersachsen<br>(Bundesland) |
|----------------------------------------------|-----------|--------------|-------------------------------|
| 3.1 Realschul- oder gleichwertiger Abschluss | Insgesamt | Unter 5      | /                             |
|                                              |           | 5 - 9        | /                             |
|                                              |           | 10 - 14      | /                             |
|                                              |           | 15 - 19      | /                             |
|                                              |           | 20 - 24      | /                             |
|                                              |           | 25 - 29      | /                             |
|                                              |           | 30 - 34      | /                             |
|                                              |           | 35 - 39      | /                             |
|                                              |           | 40 - 44      | /                             |
|                                              |           | 45 - 49      | /                             |
|                                              |           | 50 - 54      | /                             |
|                                              |           | 55 - 59      | /                             |
|                                              |           | 60 - 64      | /                             |
|                                              |           | 65 - 69      | /                             |
|                                              |           | 70 - 74      | /                             |
|                                              |           | 75 - 79      | /                             |
|                                              |           | 80 - 84      | /                             |
|                                              |           | 85 - 89      | /                             |
|                                              |           | 90 und älter | /                             |
|                                              |           | Insgesamt    | 1 913 540                     |
|                                              | Insgesamt | Unter 5      | /                             |
|                                              |           | 5 - 9        | /                             |
|                                              |           | 10 - 14      | /                             |
|                                              |           | 15 - 19      | 69 510                        |
|                                              |           | 20 - 24      | 172 720                       |
|                                              |           | 25 - 29      | 165 570                       |
|                                              |           | 30 - 34      | 165 400                       |
|                                              |           | 35 - 39      | 178 450                       |
|                                              |           | 40 - 44      | 248 290                       |
|                                              |           | 45 - 49      | 252 520                       |
|                                              |           | 50 - 54      | 185 480                       |
|                                              |           | 55 - 59      | 128 450                       |
|                                              |           | 60 - 64      | 95 490                        |
|                                              |           | 65 - 69      | 80 290                        |
|                                              |           | 70 - 74      | 73 540                        |
|                                              |           | 75 - 79      | 44 600                        |
|                                              |           | 80 - 84      | 28 360                        |
|                                              |           | 85 - 89      | 16 750                        |
|                                              |           | 90 und älter | 8 110                         |
|                                              |           | Insgesamt    | 838 550                       |
|                                              | Männlich  | Unter 5      | /                             |
|                                              |           | 5 - 9        | /                             |
|                                              |           | 10 - 14      | /                             |
|                                              |           | 15 - 19      | 36 170                        |
|                                              |           | 20 - 24      | 89 950                        |
|                                              |           | 25 - 29      | 82 230                        |
|                                              |           | 30 - 34      | 78 570                        |
|                                              |           | 35 - 39      | 77 270                        |
|                                              |           | 40 - 44      | 104 170                       |
|                                              |           | 45 - 49      | 103 540                       |
|                                              |           | 50 - 54      | 77 950                        |
|                                              |           | 55 - 59      | 53 420                        |
|                                              |           | 60 - 64      | 41 130                        |

Noch: Personen nach Alter (5er-Jahresgruppen), Höchster beruflicher Abschluss (ausführlich) und weitere Merkmale für Niedersachsen (Bundesland)

|  |                            |              | Niedersachsen<br>(Bundesland) |
|--|----------------------------|--------------|-------------------------------|
|  | Weiblich                   | 65 - 69      | 32 470                        |
|  |                            | 70 - 74      | 28 240                        |
|  |                            | 75 - 79      | 17 390                        |
|  |                            | 80 - 84      | 10 500                        |
|  |                            | 85 - 89      | 4 160                         |
|  |                            | 90 und älter | 1 390                         |
|  |                            | Insgesamt    | 1 074 990                     |
|  | Insgesamt                  | Unter 5      | /                             |
|  |                            | 5 - 9        | /                             |
|  |                            | 10 - 14      | /                             |
|  |                            | 15 - 19      | 33 340                        |
|  |                            | 20 - 24      | 82 770                        |
|  |                            | 25 - 29      | 83 340                        |
|  |                            | 30 - 34      | 86 840                        |
|  |                            | 35 - 39      | 101 180                       |
|  |                            | 40 - 44      | 144 120                       |
|  |                            | 45 - 49      | 148 980                       |
|  |                            | 50 - 54      | 107 530                       |
|  |                            | 55 - 59      | 75 020                        |
|  |                            | 60 - 64      | 54 360                        |
|  |                            | 65 - 69      | 47 810                        |
|  |                            | 70 - 74      | 45 300                        |
|  |                            | 75 - 79      | 27 220                        |
|  |                            | 80 - 84      | 17 860                        |
|  |                            | 85 - 89      | 12 600                        |
|  |                            | 90 und älter | 6 730                         |
|  |                            | Insgesamt    | 316 280                       |
|  | Insgesamt                  | Unter 5      | /                             |
|  |                            | 5 - 9        | /                             |
|  |                            | 10 - 14      | /                             |
|  |                            | 15 - 19      | 60 430                        |
|  |                            | 20 - 24      | 57 290                        |
|  |                            | 25 - 29      | 21 630                        |
|  |                            | 30 - 34      | 19 650                        |
|  |                            | 35 - 39      | 19 680                        |
|  |                            | 40 - 44      | 24 050                        |
|  |                            | 45 - 49      | 27 150                        |
|  |                            | 50 - 54      | 22 700                        |
|  |                            | 55 - 59      | 15 140                        |
|  | Ohne beruflichen Abschluss | 60 - 64      | 10 520                        |
|  |                            | 65 - 69      | 8 470                         |
|  |                            | 70 - 74      | 8 860                         |
|  |                            | 75 - 79      | 7 260                         |
|  |                            | 80 - 84      | 6 800                         |
|  |                            | 85 - 89      | 4 460                         |
|  |                            | 90 und älter | 2 160                         |
|  |                            | Insgesamt    | 128 760                       |
|  | Männlich                   | Unter 5      | /                             |
|  |                            | 5 - 9        | /                             |
|  |                            | 10 - 14      | /                             |
|  |                            | 15 - 19      | 31 360                        |
|  |                            | 20 - 24      | 28 720                        |
|  |                            | 25 - 29      | 10 260                        |

Noch: Personen nach Alter (5er-Jahresgruppen), Höchster beruflicher Abschluss (ausführlich) und weitere Merkmale für Niedersachsen (Bundesland)

|              | Niedersachsen<br>(Bundesland) |
|--------------|-------------------------------|
| 30 - 34      | 8 230                         |
| 35 - 39      | 7 660                         |
| 40 - 44      | 8 560                         |
| 45 - 49      | 10 330                        |
| 50 - 54      | 8 760                         |
| 55 - 59      | 4 750                         |
| 60 - 64      | 3 080                         |
| 65 - 69      | 1 870                         |
| 70 - 74      | 2 000                         |
| 75 - 79      | 1 200                         |
| 80 - 84      | 1 210                         |
| 85 - 89      | 650                           |
| 90 und älter | /                             |
| Insgesamt    | 187 510                       |
| Unter 5      | /                             |
| 5 - 9        | /                             |
| 10 - 14      | /                             |
| 15 - 19      | 29 070                        |
| 20 - 24      | 28 570                        |
| 25 - 29      | 11 370                        |
| 30 - 34      | 11 420                        |
| 35 - 39      | 12 030                        |
| 40 - 44      | 15 490                        |
| 45 - 49      | 16 830                        |
| 50 - 54      | 13 940                        |
| 55 - 59      | 10 390                        |
| 60 - 64      | 7 440                         |
| 65 - 69      | 6 600                         |
| 70 - 74      | 6 860                         |
| 75 - 79      | 6 060                         |
| 80 - 84      | 5 590                         |
| 85 - 89      | 3 810                         |
| 90 und älter | 2 030                         |
| Insgesamt    | 1 277 970                     |
| Unter 5      | /                             |
| 5 - 9        | /                             |
| 10 - 14      | /                             |
| 15 - 19      | 7 930                         |
| 20 - 24      | 101 510                       |
| 25 - 29      | 123 950                       |
| 30 - 34      | 122 700                       |
| 35 - 39      | 130 040                       |
| 40 - 44      | 181 670                       |
| 45 - 49      | 175 300                       |
| 50 - 54      | 121 740                       |
| 55 - 59      | 86 530                        |
| 60 - 64      | 63 050                        |
| 65 - 69      | 54 640                        |
| 70 - 74      | 48 950                        |
| 75 - 79      | 28 780                        |
| 80 - 84      | 16 410                        |
| 85 - 89      | 9 790                         |
| 90 und älter | 4 970                         |

Lehre,  
Berufsausbildung im  
dualen System

Weiblich

Noch: Personen nach Alter (5er-Jahresgruppen), Höchster beruflicher Abschluss (ausführlich) und weitere Merkmale für Niedersachsen (Bundesland)

|              | Niedersachsen<br>(Bundesland) |
|--------------|-------------------------------|
| Insgesamt    | 570 880                       |
| Unter 5      | /                             |
| 5 - 9        | /                             |
| 10 - 14      | /                             |
| 15 - 19      | 4 560                         |
| 20 - 24      | 56 670                        |
| 25 - 29      | 64 840                        |
| 30 - 34      | 60 660                        |
| 35 - 39      | 57 960                        |
| 40 - 44      | 75 560                        |
| 45 - 49      | 70 570                        |
| 50 - 54      | 51 490                        |
| 55 - 59      | 37 370                        |
| 60 - 64      | 27 250                        |
| 65 - 69      | 21 940                        |
| 70 - 74      | 18 960                        |
| 75 - 79      | 12 290                        |
| 80 - 84      | 6 840                         |
| 85 - 89      | 2 810                         |
| 90 und älter | 1 110                         |
| Insgesamt    | 707 090                       |
| Unter 5      | /                             |
| 5 - 9        | /                             |
| 10 - 14      | /                             |
| 15 - 19      | 3 360                         |
| 20 - 24      | 44 840                        |
| 25 - 29      | 59 110                        |
| 30 - 34      | 62 040                        |
| 35 - 39      | 72 090                        |
| 40 - 44      | 106 110                       |
| 45 - 49      | 104 740                       |
| 50 - 54      | 70 260                        |
| 55 - 59      | 49 160                        |
| 60 - 64      | 35 800                        |
| 65 - 69      | 32 700                        |
| 70 - 74      | 29 980                        |
| 75 - 79      | 16 490                        |
| 80 - 84      | 9 570                         |
| 85 - 89      | 6 980                         |
| 90 und älter | 3 860                         |
| Insgesamt    | 319 290                       |
| Unter 5      | /                             |
| 5 - 9        | /                             |
| 10 - 14      | /                             |
| 15 - 19      | 1 150                         |
| 20 - 24      | 13 930                        |
| 25 - 29      | 19 990                        |
| 30 - 34      | 23 050                        |
| 35 - 39      | 28 730                        |
| 40 - 44      | 42 560                        |
| 45 - 49      | 50 060                        |
| 50 - 54      | 41 040                        |
| 55 - 59      | 26 770                        |

Männlich

Weiblich

Fachschulabschluss

Noch: Personen nach Alter (5er-Jahresgruppen), Höchster beruflicher Abschluss (ausführlich) und weitere Merkmale für Niedersachsen (Bundesland)

|                                                  |              | Niedersachsen<br>(Bundesland) |
|--------------------------------------------------|--------------|-------------------------------|
|                                                  | 60 - 64      | 21 910                        |
|                                                  | 65 - 69      | 17 170                        |
|                                                  | 70 - 74      | 15 730                        |
|                                                  | 75 - 79      | 8 570                         |
|                                                  | 80 - 84      | 5 150                         |
|                                                  | 85 - 89      | 2 500                         |
|                                                  | 90 und älter | 980                           |
|                                                  | Insgesamt    | 138 910                       |
|                                                  | Unter 5      | /                             |
|                                                  | 5 - 9        | /                             |
|                                                  | 10 - 14      | /                             |
|                                                  | 15 - 19      | /                             |
|                                                  | 20 - 24      | 4 570                         |
|                                                  | 25 - 29      | 7 140                         |
|                                                  | 30 - 34      | 9 680                         |
|                                                  | 35 - 39      | 11 660                        |
| Männlich                                         | 40 - 44      | 20 040                        |
|                                                  | 45 - 49      | 22 640                        |
|                                                  | 50 - 54      | 17 710                        |
|                                                  | 55 - 59      | 11 290                        |
|                                                  | 60 - 64      | 10 790                        |
|                                                  | 65 - 69      | 8 660                         |
|                                                  | 70 - 74      | 7 280                         |
|                                                  | 75 - 79      | 3 910                         |
|                                                  | 80 - 84      | 2 460                         |
|                                                  | 85 - 89      | 690                           |
|                                                  | 90 und älter | /                             |
|                                                  | Insgesamt    | 180 380                       |
|                                                  | Unter 5      | /                             |
|                                                  | 5 - 9        | /                             |
|                                                  | 10 - 14      | /                             |
|                                                  | 15 - 19      | 910                           |
|                                                  | 20 - 24      | 9 360                         |
|                                                  | 25 - 29      | 12 850                        |
|                                                  | 30 - 34      | 13 370                        |
|                                                  | 35 - 39      | 17 070                        |
| Weiblich                                         | 40 - 44      | 22 520                        |
|                                                  | 45 - 49      | 27 420                        |
|                                                  | 50 - 54      | 23 330                        |
|                                                  | 55 - 59      | 15 480                        |
|                                                  | 60 - 64      | 11 120                        |
|                                                  | 65 - 69      | 8 510                         |
|                                                  | 70 - 74      | 8 460                         |
|                                                  | 75 - 79      | 4 660                         |
|                                                  | 80 - 84      | 2 690                         |
|                                                  | 85 - 89      | 1 810                         |
|                                                  | 90 und älter | 830                           |
|                                                  | Insgesamt    | /                             |
|                                                  | Unter 5      | /                             |
|                                                  | 5 - 9        | /                             |
| Abschluss einer Fachakademie oder Berufsakademie | 10 - 14      | /                             |
|                                                  | 15 - 19      | /                             |
|                                                  | 20 - 24      | /                             |

Noch: Personen nach Alter (5er-Jahresgruppen), Höchster beruflicher Abschluss (ausführlich) und weitere Merkmale für Niedersachsen (Bundesland)

|          |              | Niedersachsen<br>(Bundesland) |
|----------|--------------|-------------------------------|
|          | 25 - 29      | /                             |
|          | 30 - 34      | /                             |
|          | 35 - 39      | /                             |
|          | 40 - 44      | /                             |
|          | 45 - 49      | /                             |
|          | 50 - 54      | /                             |
|          | 55 - 59      | /                             |
|          | 60 - 64      | /                             |
|          | 65 - 69      | /                             |
|          | 70 - 74      | /                             |
|          | 75 - 79      | /                             |
|          | 80 - 84      | /                             |
|          | 85 - 89      | /                             |
|          | 90 und älter | /                             |
|          | Insgesamt    | /                             |
|          | Unter 5      | /                             |
|          | 5 - 9        | /                             |
|          | 10 - 14      | /                             |
|          | 15 - 19      | /                             |
|          | 20 - 24      | /                             |
|          | 25 - 29      | /                             |
|          | 30 - 34      | /                             |
|          | 35 - 39      | /                             |
| Männlich | 40 - 44      | /                             |
|          | 45 - 49      | /                             |
|          | 50 - 54      | /                             |
|          | 55 - 59      | /                             |
|          | 60 - 64      | /                             |
|          | 65 - 69      | /                             |
|          | 70 - 74      | /                             |
|          | 75 - 79      | /                             |
|          | 80 - 84      | /                             |
|          | 85 - 89      | /                             |
|          | 90 und älter | /                             |
|          | Insgesamt    | /                             |
|          | Unter 5      | /                             |
|          | 5 - 9        | /                             |
|          | 10 - 14      | /                             |
|          | 15 - 19      | /                             |
|          | 20 - 24      | /                             |
|          | 25 - 29      | /                             |
|          | 30 - 34      | /                             |
|          | 35 - 39      | /                             |
| Weiblich | 40 - 44      | /                             |
|          | 45 - 49      | /                             |
|          | 50 - 54      | /                             |
|          | 55 - 59      | /                             |
|          | 60 - 64      | /                             |
|          | 65 - 69      | /                             |
|          | 70 - 74      | /                             |
|          | 75 - 79      | /                             |
|          | 80 - 84      | /                             |
|          | 85 - 89      | /                             |

Noch: Personen nach Alter (5er-Jahresgruppen), Höchster beruflicher Abschluss (ausführlich) und weitere Merkmale für Niedersachsen (Bundesland)

|                            |              | Niedersachsen<br>(Bundesland) |
|----------------------------|--------------|-------------------------------|
|                            | 90 und älter | /                             |
|                            | Insgesamt    | /                             |
|                            | Unter 5      | /                             |
|                            | 5 - 9        | /                             |
|                            | 10 - 14      | /                             |
|                            | 15 - 19      | /                             |
|                            | 20 - 24      | /                             |
|                            | 25 - 29      | /                             |
|                            | 30 - 34      | /                             |
|                            | 35 - 39      | /                             |
| Insgesamt                  | 40 - 44      | /                             |
|                            | 45 - 49      | /                             |
|                            | 50 - 54      | /                             |
|                            | 55 - 59      | /                             |
|                            | 60 - 64      | /                             |
|                            | 65 - 69      | /                             |
|                            | 70 - 74      | /                             |
|                            | 75 - 79      | /                             |
|                            | 80 - 84      | /                             |
|                            | 85 - 89      | /                             |
|                            | 90 und älter | /                             |
|                            | Insgesamt    | /                             |
|                            | Unter 5      | /                             |
|                            | 5 - 9        | /                             |
|                            | 10 - 14      | /                             |
|                            | 15 - 19      | /                             |
| Fachhochschulabschl<br>uss | 20 - 24      | /                             |
|                            | 25 - 29      | /                             |
|                            | 30 - 34      | /                             |
|                            | 35 - 39      | /                             |
|                            | 40 - 44      | /                             |
| Männlich                   | 45 - 49      | /                             |
|                            | 50 - 54      | /                             |
|                            | 55 - 59      | /                             |
|                            | 60 - 64      | /                             |
|                            | 65 - 69      | /                             |
|                            | 70 - 74      | /                             |
|                            | 75 - 79      | /                             |
|                            | 80 - 84      | /                             |
|                            | 85 - 89      | /                             |
|                            | 90 und älter | /                             |
|                            | Insgesamt    | /                             |
|                            | Unter 5      | /                             |
|                            | 5 - 9        | /                             |
|                            | 10 - 14      | /                             |
|                            | 15 - 19      | /                             |
|                            | 20 - 24      | /                             |
|                            | 25 - 29      | /                             |
|                            | 30 - 34      | /                             |
|                            | 35 - 39      | /                             |
|                            | 40 - 44      | /                             |
|                            | 45 - 49      | /                             |
|                            | 50 - 54      | /                             |

Noch: Personen nach Alter (5er-Jahresgruppen), Höchster beruflicher Abschluss (ausführlich) und weitere Merkmale für Niedersachsen (Bundesland)

|           |              | Niedersachsen<br>(Bundesland) |
|-----------|--------------|-------------------------------|
|           | 55 - 59      | /                             |
|           | 60 - 64      | /                             |
|           | 65 - 69      | /                             |
|           | 70 - 74      | /                             |
|           | 75 - 79      | /                             |
|           | 80 - 84      | /                             |
|           | 85 - 89      | /                             |
|           | 90 und älter | /                             |
|           | Insgesamt    | /                             |
|           | Unter 5      | /                             |
|           | 5 - 9        | /                             |
|           | 10 - 14      | /                             |
|           | 15 - 19      | /                             |
|           | 20 - 24      | /                             |
|           | 25 - 29      | /                             |
|           | 30 - 34      | /                             |
|           | 35 - 39      | /                             |
|           | 40 - 44      | /                             |
| Insgesamt | 45 - 49      | /                             |
|           | 50 - 54      | /                             |
|           | 55 - 59      | /                             |
|           | 60 - 64      | /                             |
|           | 65 - 69      | /                             |
|           | 70 - 74      | /                             |
|           | 75 - 79      | /                             |
|           | 80 - 84      | /                             |
|           | 85 - 89      | /                             |
|           | 90 und älter | /                             |
|           | Insgesamt    | /                             |
|           | Unter 5      | /                             |
|           | 5 - 9        | /                             |
|           | 10 - 14      | /                             |
|           | 15 - 19      | /                             |
|           | 20 - 24      | /                             |
|           | 25 - 29      | /                             |
|           | 30 - 34      | /                             |
|           | 35 - 39      | /                             |
|           | 40 - 44      | /                             |
|           | 45 - 49      | /                             |
|           | 50 - 54      | /                             |
|           | 55 - 59      | /                             |
|           | 60 - 64      | /                             |
|           | 65 - 69      | /                             |
|           | 70 - 74      | /                             |
|           | 75 - 79      | /                             |
|           | 80 - 84      | /                             |
|           | 85 - 89      | /                             |
|           | 90 und älter | /                             |
|           | Insgesamt    | /                             |
|           | Unter 5      | /                             |
|           | 5 - 9        | /                             |
|           | 10 - 14      | /                             |
|           | 15 - 19      | /                             |
|           | 20 - 24      | /                             |
|           | 25 - 29      | /                             |
|           | 30 - 34      | /                             |
|           | 35 - 39      | /                             |
|           | 40 - 44      | /                             |
|           | 45 - 49      | /                             |
|           | 50 - 54      | /                             |
|           | 55 - 59      | /                             |
|           | 60 - 64      | /                             |
|           | 65 - 69      | /                             |
|           | 70 - 74      | /                             |
|           | 75 - 79      | /                             |
|           | 80 - 84      | /                             |
|           | 85 - 89      | /                             |
|           | 90 und älter | /                             |
|           | Insgesamt    | /                             |
|           | Unter 5      | /                             |
|           | 5 - 9        | /                             |
|           | 10 - 14      | /                             |
|           | 15 - 19      | /                             |

Noch: Personen nach Alter (5er-Jahresgruppen), Höchster beruflicher Abschluss (ausführlich) und weitere Merkmale für Niedersachsen (Bundesland)

|              | Niedersachsen<br>(Bundesland) |
|--------------|-------------------------------|
| 20 - 24      | /                             |
| 25 - 29      | /                             |
| 30 - 34      | /                             |
| 35 - 39      | /                             |
| 40 - 44      | /                             |
| 45 - 49      | /                             |
| 50 - 54      | /                             |
| 55 - 59      | /                             |
| 60 - 64      | /                             |
| 65 - 69      | /                             |
| 70 - 74      | /                             |
| 75 - 79      | /                             |
| 80 - 84      | /                             |
| 85 - 89      | /                             |
| 90 und älter | /                             |
| Insgesamt    | /                             |
| Unter 5      | /                             |
| 5 - 9        | /                             |
| 10 - 14      | /                             |
| 15 - 19      | /                             |
| 20 - 24      | /                             |
| 25 - 29      | /                             |
| 30 - 34      | /                             |
| 35 - 39      | /                             |
| 40 - 44      | /                             |
| Insgesamt    | /                             |
| 45 - 49      | /                             |
| 50 - 54      | /                             |
| 55 - 59      | /                             |
| 60 - 64      | /                             |
| 65 - 69      | /                             |
| 70 - 74      | /                             |
| 75 - 79      | /                             |
| 80 - 84      | /                             |
| 85 - 89      | /                             |
| 90 und älter | /                             |
| Insgesamt    | /                             |
| Unter 5      | /                             |
| 5 - 9        | /                             |
| 10 - 14      | /                             |
| 15 - 19      | /                             |
| 20 - 24      | /                             |
| 25 - 29      | /                             |
| 30 - 34      | /                             |
| 35 - 39      | /                             |
| 40 - 44      | /                             |
| 45 - 49      | /                             |
| 50 - 54      | /                             |
| 55 - 59      | /                             |
| 60 - 64      | /                             |
| 65 - 69      | /                             |
| 70 - 74      | /                             |
| 75 - 79      | /                             |
| 80 - 84      | /                             |
| 85 - 89      | /                             |
| 90 und älter | /                             |
| Insgesamt    | /                             |
| Unter 5      | /                             |
| 5 - 9        | /                             |
| 10 - 14      | /                             |
| 15 - 19      | /                             |
| 20 - 24      | /                             |
| 25 - 29      | /                             |
| 30 - 34      | /                             |
| 35 - 39      | /                             |
| 40 - 44      | /                             |
| 45 - 49      | /                             |
| 50 - 54      | /                             |
| 55 - 59      | /                             |
| 60 - 64      | /                             |
| 65 - 69      | /                             |
| 70 - 74      | /                             |
| 75 - 79      | /                             |
| 80 - 84      | /                             |

Noch: Personen nach Alter (5er-Jahresgruppen), Höchster beruflicher Abschluss (ausführlich) und weitere Merkmale für Niedersachsen (Bundesland)

|              | Niedersachsen<br>(Bundesland) |
|--------------|-------------------------------|
| 85 - 89      | /                             |
| 90 und älter | /                             |
| Insgesamt    | /                             |
| Unter 5      | /                             |
| 5 - 9        | /                             |
| 10 - 14      | /                             |
| 15 - 19      | /                             |
| 20 - 24      | /                             |
| 25 - 29      | /                             |
| 30 - 34      | /                             |
| 35 - 39      | /                             |
| 40 - 44      | /                             |
| 45 - 49      | /                             |
| 50 - 54      | /                             |
| 55 - 59      | /                             |
| 60 - 64      | /                             |
| 65 - 69      | /                             |
| 70 - 74      | /                             |
| 75 - 79      | /                             |
| 80 - 84      | /                             |
| 85 - 89      | /                             |
| 90 und älter | /                             |
| Insgesamt    | 143 690                       |
| Unter 5      | /                             |
| 5 - 9        | /                             |
| 10 - 14      | /                             |
| 15 - 19      | 123 240                       |
| 20 - 24      | 17 850                        |
| 25 - 29      | 1 660                         |
| 30 - 34      | 650                           |
| 35 - 39      | /                             |
| 40 - 44      | /                             |
| 45 - 49      | /                             |
| 50 - 54      | /                             |
| 55 - 59      | /                             |
| 60 - 64      | /                             |
| 65 - 69      | /                             |
| 70 - 74      | /                             |
| 75 - 79      | /                             |
| 80 - 84      | /                             |
| 85 - 89      | /                             |
| 90 und älter | /                             |
| Insgesamt    | 66 640                        |
| Unter 5      | /                             |
| 5 - 9        | /                             |
| 10 - 14      | /                             |
| 15 - 19      | 55 760                        |
| 20 - 24      | 9 340                         |
| 25 - 29      | 1 050                         |
| 30 - 34      | /                             |
| 35 - 39      | /                             |
| 40 - 44      | /                             |
| 45 - 49      | /                             |

Noch: Personen nach Alter (5er-Jahresgruppen), Höchster beruflicher Abschluss (ausführlich) und weitere Merkmale für Niedersachsen (Bundesland)

|                               |              | Niedersachsen<br>(Bundesland) |
|-------------------------------|--------------|-------------------------------|
|                               | 50 - 54      | /                             |
|                               | 55 - 59      | /                             |
|                               | 60 - 64      | /                             |
|                               | 65 - 69      | /                             |
|                               | 70 - 74      | /                             |
|                               | 75 - 79      | /                             |
|                               | 80 - 84      | /                             |
|                               | 85 - 89      | /                             |
|                               | 90 und älter | /                             |
|                               | Insgesamt    | 77 050                        |
|                               | Unter 5      | /                             |
|                               | 5 - 9        | /                             |
|                               | 10 - 14      | /                             |
|                               | 15 - 19      | 67 480                        |
|                               | 20 - 24      | 8 520                         |
|                               | 25 - 29      | 610                           |
|                               | 30 - 34      | /                             |
|                               | 35 - 39      | /                             |
|                               | 40 - 44      | /                             |
| Weiblich                      | 45 - 49      | /                             |
|                               | 50 - 54      | /                             |
|                               | 55 - 59      | /                             |
|                               | 60 - 64      | /                             |
|                               | 65 - 69      | /                             |
|                               | 70 - 74      | /                             |
|                               | 75 - 79      | /                             |
|                               | 80 - 84      | /                             |
|                               | 85 - 89      | /                             |
|                               | 90 und älter | /                             |
|                               | Insgesamt    | 136 370                       |
|                               | Unter 5      | /                             |
|                               | 5 - 9        | /                             |
|                               | 10 - 14      | /                             |
|                               | 15 - 19      | 121 730                       |
|                               | 20 - 24      | 13 740                        |
|                               | 25 - 29      | 680                           |
|                               | 30 - 34      | /                             |
|                               | 35 - 39      | /                             |
|                               | 40 - 44      | /                             |
| Insgesamt                     | 45 - 49      | /                             |
|                               | 50 - 54      | /                             |
| Ohne beruflichen<br>Abschluss | 55 - 59      | /                             |
|                               | 60 - 64      | /                             |
|                               | 65 - 69      | /                             |
|                               | 70 - 74      | /                             |
|                               | 75 - 79      | /                             |
|                               | 80 - 84      | /                             |
|                               | 85 - 89      | /                             |
|                               | 90 und älter | /                             |
|                               | Insgesamt    | 62 710                        |
| Männlich                      | Unter 5      | /                             |
|                               | 5 - 9        | /                             |
|                               | 10 - 14      | /                             |

Noch: Personen nach Alter (5er-Jahresgruppen), Höchster beruflicher Abschluss (ausführlich) und weitere Merkmale für Niedersachsen (Bundesland)

|                                                |              | Niedersachsen<br>(Bundesland) |
|------------------------------------------------|--------------|-------------------------------|
|                                                | 15 - 19      | 55 210                        |
|                                                | 20 - 24      | 7 040                         |
|                                                | 25 - 29      | /                             |
|                                                | 30 - 34      | /                             |
|                                                | 35 - 39      | /                             |
|                                                | 40 - 44      | /                             |
|                                                | 45 - 49      | /                             |
|                                                | 50 - 54      | /                             |
|                                                | 55 - 59      | /                             |
|                                                | 60 - 64      | /                             |
|                                                | 65 - 69      | /                             |
|                                                | 70 - 74      | /                             |
|                                                | 75 - 79      | /                             |
|                                                | 80 - 84      | /                             |
|                                                | 85 - 89      | /                             |
|                                                | 90 und älter | /                             |
|                                                | Insgesamt    | 73 660                        |
|                                                | Unter 5      | /                             |
|                                                | 5 - 9        | /                             |
|                                                | 10 - 14      | /                             |
|                                                | 15 - 19      | 66 520                        |
|                                                | 20 - 24      | 6 700                         |
|                                                | 25 - 29      | /                             |
|                                                | 30 - 34      | /                             |
|                                                | 35 - 39      | /                             |
|                                                | 40 - 44      | /                             |
| Weiblich                                       | 45 - 49      | /                             |
|                                                | 50 - 54      | /                             |
|                                                | 55 - 59      | /                             |
|                                                | 60 - 64      | /                             |
|                                                | 65 - 69      | /                             |
|                                                | 70 - 74      | /                             |
|                                                | 75 - 79      | /                             |
|                                                | 80 - 84      | /                             |
|                                                | 85 - 89      | /                             |
|                                                | 90 und älter | /                             |
|                                                | Insgesamt    | 5 580                         |
|                                                | Unter 5      | /                             |
|                                                | 5 - 9        | /                             |
|                                                | 10 - 14      | /                             |
|                                                | 15 - 19      | 770                           |
|                                                | 20 - 24      | 3 480                         |
|                                                | 25 - 29      | 840                           |
|                                                | 30 - 34      | /                             |
| Lehre,<br>Berufsausbildung im<br>dualen System | 35 - 39      | /                             |
| Insgesamt                                      | 40 - 44      | /                             |
|                                                | 45 - 49      | /                             |
|                                                | 50 - 54      | /                             |
|                                                | 55 - 59      | /                             |
|                                                | 60 - 64      | /                             |
|                                                | 65 - 69      | /                             |
|                                                | 70 - 74      | /                             |
|                                                | 75 - 79      | /                             |

Noch: Personen nach Alter (5er-Jahresgruppen), Höchster beruflicher Abschluss (ausführlich) und weitere Merkmale für Niedersachsen (Bundesland)

|                              | Niedersachsen<br>(Bundesland) |
|------------------------------|-------------------------------|
| 80 - 84                      | /                             |
| 85 - 89                      | /                             |
| 90 und älter                 | /                             |
| Insgesamt                    | 3 300                         |
| Unter 5                      | /                             |
| 5 - 9                        | /                             |
| 10 - 14                      | /                             |
| 15 - 19                      | /                             |
| 20 - 24                      | 2 000                         |
| 25 - 29                      | 660                           |
| 30 - 34                      | /                             |
| 35 - 39                      | /                             |
| 40 - 44                      | /                             |
| Männlich                     |                               |
| 45 - 49                      | /                             |
| 50 - 54                      | /                             |
| 55 - 59                      | /                             |
| 60 - 64                      | /                             |
| 65 - 69                      | /                             |
| 70 - 74                      | /                             |
| 75 - 79                      | /                             |
| 80 - 84                      | /                             |
| 85 - 89                      | /                             |
| 90 und älter                 | /                             |
| Insgesamt                    | 2 280                         |
| Unter 5                      | /                             |
| 5 - 9                        | /                             |
| 10 - 14                      | /                             |
| 15 - 19                      | /                             |
| 20 - 24                      | 1 480                         |
| 25 - 29                      | /                             |
| 30 - 34                      | /                             |
| 35 - 39                      | /                             |
| Weiblich                     |                               |
| 40 - 44                      | /                             |
| 45 - 49                      | /                             |
| 50 - 54                      | /                             |
| 55 - 59                      | /                             |
| 60 - 64                      | /                             |
| 65 - 69                      | /                             |
| 70 - 74                      | /                             |
| 75 - 79                      | /                             |
| 80 - 84                      | /                             |
| 85 - 89                      | /                             |
| 90 und älter                 | /                             |
| Insgesamt                    | 1 740                         |
| Unter 5                      | /                             |
| 5 - 9                        | /                             |
| 10 - 14                      | /                             |
| 15 - 19                      | 740                           |
| 20 - 24                      | 630                           |
| 25 - 29                      | /                             |
| 30 - 34                      | /                             |
| 35 - 39                      | /                             |
| 40 - 44                      | /                             |
| Fachschulabschluss Insgesamt |                               |

Noch: Personen nach Alter (5er-Jahresgruppen), Höchster beruflicher Abschluss (ausführlich) und weitere Merkmale für Niedersachsen (Bundesland)

|                                                            | Niedersachsen<br>(Bundesland) |
|------------------------------------------------------------|-------------------------------|
| 45 - 49                                                    | /                             |
| 50 - 54                                                    | /                             |
| 55 - 59                                                    | /                             |
| 60 - 64                                                    | /                             |
| 65 - 69                                                    | /                             |
| 70 - 74                                                    | /                             |
| 75 - 79                                                    | /                             |
| 80 - 84                                                    | /                             |
| 85 - 89                                                    | /                             |
| 90 und älter                                               | /                             |
| Insgesamt                                                  | 630                           |
| Unter 5                                                    | /                             |
| 5 - 9                                                      | /                             |
| 10 - 14                                                    | /                             |
| 15 - 19                                                    | /                             |
| 20 - 24                                                    | /                             |
| 25 - 29                                                    | /                             |
| 30 - 34                                                    | /                             |
| 35 - 39                                                    | /                             |
| 40 - 44                                                    | /                             |
| Männlich                                                   |                               |
| 45 - 49                                                    | /                             |
| 50 - 54                                                    | /                             |
| 55 - 59                                                    | /                             |
| 60 - 64                                                    | /                             |
| 65 - 69                                                    | /                             |
| 70 - 74                                                    | /                             |
| 75 - 79                                                    | /                             |
| 80 - 84                                                    | /                             |
| 85 - 89                                                    | /                             |
| 90 und älter                                               | /                             |
| Insgesamt                                                  | 1 110                         |
| Unter 5                                                    | /                             |
| 5 - 9                                                      | /                             |
| 10 - 14                                                    | /                             |
| 15 - 19                                                    | 540                           |
| 20 - 24                                                    | /                             |
| 25 - 29                                                    | /                             |
| 30 - 34                                                    | /                             |
| 35 - 39                                                    | /                             |
| 40 - 44                                                    | /                             |
| Weiblich                                                   |                               |
| 45 - 49                                                    | /                             |
| 50 - 54                                                    | /                             |
| 55 - 59                                                    | /                             |
| 60 - 64                                                    | /                             |
| 65 - 69                                                    | /                             |
| 70 - 74                                                    | /                             |
| 75 - 79                                                    | /                             |
| 80 - 84                                                    | /                             |
| 85 - 89                                                    | /                             |
| 90 und älter                                               | /                             |
| Insgesamt                                                  | /                             |
| Unter 5                                                    | /                             |
| 5 - 9                                                      | /                             |
| Abschluss einer Fachakademie oder Berufsakademie Insgesamt |                               |

Noch: Personen nach Alter (5er-Jahresgruppen), Höchster beruflicher Abschluss (ausführlich) und weitere Merkmale für Niedersachsen (Bundesland)

|          |              | Niedersachsen<br>(Bundesland) |   |
|----------|--------------|-------------------------------|---|
|          | 10 - 14      | /                             |   |
|          | 15 - 19      | /                             |   |
|          | 20 - 24      | /                             |   |
|          | 25 - 29      | /                             |   |
|          | 30 - 34      | /                             |   |
|          | 35 - 39      | /                             |   |
|          | 40 - 44      | /                             |   |
|          | 45 - 49      | /                             |   |
|          | 50 - 54      | /                             |   |
|          | 55 - 59      | /                             |   |
|          | 60 - 64      | /                             |   |
|          | 65 - 69      | /                             |   |
|          | 70 - 74      | /                             |   |
|          | 75 - 79      | /                             |   |
|          | 80 - 84      | /                             |   |
|          | 85 - 89      | /                             |   |
|          | 90 und älter | /                             |   |
|          | Insgesamt    | /                             |   |
|          | Unter 5      | /                             |   |
|          | 5 - 9        | /                             |   |
|          | 10 - 14      | /                             |   |
|          | 15 - 19      | /                             |   |
|          | 20 - 24      | /                             |   |
|          | 25 - 29      | /                             |   |
|          | 30 - 34      | /                             |   |
|          | 35 - 39      | /                             |   |
|          | Männlich     | 40 - 44                       | / |
|          |              | 45 - 49                       | / |
|          |              | 50 - 54                       | / |
|          |              | 55 - 59                       | / |
|          | 60 - 64      | /                             |   |
|          | 65 - 69      | /                             |   |
|          | 70 - 74      | /                             |   |
|          | 75 - 79      | /                             |   |
|          | 80 - 84      | /                             |   |
|          | 85 - 89      | /                             |   |
|          | 90 und älter | /                             |   |
|          | Insgesamt    | /                             |   |
|          | Unter 5      | /                             |   |
|          | 5 - 9        | /                             |   |
|          | 10 - 14      | /                             |   |
|          | 15 - 19      | /                             |   |
|          | 20 - 24      | /                             |   |
|          | 25 - 29      | /                             |   |
|          | 30 - 34      | /                             |   |
| Weiblich | 35 - 39      | /                             |   |
|          | 40 - 44      | /                             |   |
|          | 45 - 49      | /                             |   |
|          | 50 - 54      | /                             |   |
|          | 55 - 59      | /                             |   |
|          | 60 - 64      | /                             |   |
|          | 65 - 69      | /                             |   |
|          | 70 - 74      | /                             |   |

Noch: Personen nach Alter (5er-Jahresgruppen), Höchster beruflicher Abschluss (ausführlich) und weitere Merkmale für Niedersachsen (Bundesland)

|                            |              | Niedersachsen<br>(Bundesland) |   |
|----------------------------|--------------|-------------------------------|---|
|                            | 75 - 79      | /                             |   |
|                            | 80 - 84      | /                             |   |
|                            | 85 - 89      | /                             |   |
|                            | 90 und älter | /                             |   |
|                            | Insgesamt    | /                             |   |
|                            | Unter 5      | /                             |   |
|                            | 5 - 9        | /                             |   |
|                            | 10 - 14      | /                             |   |
|                            | 15 - 19      | /                             |   |
|                            | 20 - 24      | /                             |   |
|                            | 25 - 29      | /                             |   |
|                            | 30 - 34      | /                             |   |
|                            | 35 - 39      | /                             |   |
|                            | Insgesamt    | 40 - 44                       | / |
|                            |              | 45 - 49                       | / |
|                            |              | 50 - 54                       | / |
|                            |              | 55 - 59                       | / |
|                            |              | 60 - 64                       | / |
|                            |              | 65 - 69                       | / |
|                            |              | 70 - 74                       | / |
|                            |              | 75 - 79                       | / |
|                            |              | 80 - 84                       | / |
|                            |              | 85 - 89                       | / |
|                            | 90 und älter | /                             |   |
|                            | Insgesamt    | /                             |   |
| Unter 5                    | /            |                               |   |
| 5 - 9                      | /            |                               |   |
| Fachhochschulabschl<br>uss | 10 - 14      | /                             |   |
|                            | 15 - 19      | /                             |   |
|                            | 20 - 24      | /                             |   |
|                            | 25 - 29      | /                             |   |
|                            | 30 - 34      | /                             |   |
|                            | 35 - 39      | /                             |   |
|                            | Männlich     | 40 - 44                       | / |
|                            |              | 45 - 49                       | / |
|                            |              | 50 - 54                       | / |
|                            |              | 55 - 59                       | / |
| 60 - 64                    |              | /                             |   |
| 65 - 69                    |              | /                             |   |
| 70 - 74                    |              | /                             |   |
| 75 - 79                    |              | /                             |   |
| 80 - 84                    |              | /                             |   |
| 85 - 89                    |              | /                             |   |
| 90 und älter               | /            |                               |   |
| Insgesamt                  | /            |                               |   |
| Unter 5                    | /            |                               |   |
| 5 - 9                      | /            |                               |   |
| Weiblich                   | 10 - 14      | /                             |   |
|                            | 15 - 19      | /                             |   |
|                            | 20 - 24      | /                             |   |
|                            | 25 - 29      | /                             |   |
|                            | 30 - 34      | /                             |   |
|                            | 35 - 39      | /                             |   |

Noch: Personen nach Alter (5er-Jahresgruppen), Höchster beruflicher Abschluss (ausführlich) und weitere Merkmale für Niedersachsen (Bundesland)

|                    |              | Niedersachsen<br>(Bundesland) |
|--------------------|--------------|-------------------------------|
|                    | 40 - 44      | /                             |
|                    | 45 - 49      | /                             |
|                    | 50 - 54      | /                             |
|                    | 55 - 59      | /                             |
|                    | 60 - 64      | /                             |
|                    | 65 - 69      | /                             |
|                    | 70 - 74      | /                             |
|                    | 75 - 79      | /                             |
|                    | 80 - 84      | /                             |
|                    | 85 - 89      | /                             |
|                    | 90 und älter | /                             |
|                    | Insgesamt    | /                             |
|                    | Unter 5      | /                             |
|                    | 5 - 9        | /                             |
|                    | 10 - 14      | /                             |
|                    | 15 - 19      | /                             |
|                    | 20 - 24      | /                             |
|                    | 25 - 29      | /                             |
|                    | 30 - 34      | /                             |
|                    | 35 - 39      | /                             |
| Insgesamt          | 40 - 44      | /                             |
|                    | 45 - 49      | /                             |
|                    | 50 - 54      | /                             |
|                    | 55 - 59      | /                             |
|                    | 60 - 64      | /                             |
|                    | 65 - 69      | /                             |
|                    | 70 - 74      | /                             |
|                    | 75 - 79      | /                             |
|                    | 80 - 84      | /                             |
|                    | 85 - 89      | /                             |
|                    | 90 und älter | /                             |
| Hochschulabschluss | Insgesamt    | /                             |
|                    | Unter 5      | /                             |
|                    | 5 - 9        | /                             |
|                    | 10 - 14      | /                             |
|                    | 15 - 19      | /                             |
|                    | 20 - 24      | /                             |
|                    | 25 - 29      | /                             |
|                    | 30 - 34      | /                             |
|                    | 35 - 39      | /                             |
| Männlich           | 40 - 44      | /                             |
|                    | 45 - 49      | /                             |
|                    | 50 - 54      | /                             |
|                    | 55 - 59      | /                             |
|                    | 60 - 64      | /                             |
|                    | 65 - 69      | /                             |
|                    | 70 - 74      | /                             |
|                    | 75 - 79      | /                             |
|                    | 80 - 84      | /                             |
|                    | 85 - 89      | /                             |
|                    | 90 und älter | /                             |
| Weiblich           | Insgesamt    | /                             |
|                    | Unter 5      | /                             |

Noch: Personen nach Alter (5er-Jahresgruppen), Höchster beruflicher Abschluss (ausführlich) und weitere Merkmale für Niedersachsen (Bundesland)

|           |              | Niedersachsen<br>(Bundesland) |
|-----------|--------------|-------------------------------|
|           | 5 - 9        | /                             |
|           | 10 - 14      | /                             |
|           | 15 - 19      | /                             |
|           | 20 - 24      | /                             |
|           | 25 - 29      | /                             |
|           | 30 - 34      | /                             |
|           | 35 - 39      | /                             |
|           | 40 - 44      | /                             |
|           | 45 - 49      | /                             |
|           | 50 - 54      | /                             |
|           | 55 - 59      | /                             |
|           | 60 - 64      | /                             |
|           | 65 - 69      | /                             |
|           | 70 - 74      | /                             |
|           | 75 - 79      | /                             |
|           | 80 - 84      | /                             |
|           | 85 - 89      | /                             |
|           | 90 und älter | /                             |
|           | Insgesamt    | /                             |
|           | Unter 5      | /                             |
|           | 5 - 9        | /                             |
|           | 10 - 14      | /                             |
|           | 15 - 19      | /                             |
|           | 20 - 24      | /                             |
|           | 25 - 29      | /                             |
|           | 30 - 34      | /                             |
|           | 35 - 39      | /                             |
| Insgesamt | 40 - 44      | /                             |
|           | 45 - 49      | /                             |
|           | 50 - 54      | /                             |
|           | 55 - 59      | /                             |
|           | 60 - 64      | /                             |
|           | 65 - 69      | /                             |
|           | 70 - 74      | /                             |
|           | 75 - 79      | /                             |
| Promotion | 80 - 84      | /                             |
|           | 85 - 89      | /                             |
|           | 90 und älter | /                             |
|           | Insgesamt    | /                             |
|           | Unter 5      | /                             |
|           | 5 - 9        | /                             |
|           | 10 - 14      | /                             |
|           | 15 - 19      | /                             |
|           | 20 - 24      | /                             |
|           | 25 - 29      | /                             |
| Männlich  | 30 - 34      | /                             |
|           | 35 - 39      | /                             |
|           | 40 - 44      | /                             |
|           | 45 - 49      | /                             |
|           | 50 - 54      | /                             |
|           | 55 - 59      | /                             |
|           | 60 - 64      | /                             |
|           | 65 - 69      | /                             |

Noch: Personen nach Alter (5er-Jahresgruppen), Höchster beruflicher Abschluss (ausführlich) und weitere Merkmale für Niedersachsen (Bundesland)

|  |              | Niedersachsen<br>(Bundesland) |
|--|--------------|-------------------------------|
|  | 70 - 74      | /                             |
|  | 75 - 79      | /                             |
|  | 80 - 84      | /                             |
|  | 85 - 89      | /                             |
|  | 90 und älter | /                             |
|  | Insgesamt    | /                             |
|  | Unter 5      | /                             |
|  | 5 - 9        | /                             |
|  | 10 - 14      | /                             |
|  | 15 - 19      | /                             |
|  | 20 - 24      | /                             |
|  | 25 - 29      | /                             |
|  | 30 - 34      | /                             |
|  | 35 - 39      | /                             |
|  | 40 - 44      | /                             |
|  | 45 - 49      | /                             |
|  | 50 - 54      | /                             |
|  | 55 - 59      | /                             |
|  | 60 - 64      | /                             |
|  | 65 - 69      | /                             |
|  | 70 - 74      | /                             |
|  | 75 - 79      | /                             |
|  | 80 - 84      | /                             |
|  | 85 - 89      | /                             |
|  | 90 und älter | /                             |
|  | Insgesamt    | 523 840                       |
|  | Unter 5      | /                             |
|  | 5 - 9        | /                             |
|  | 10 - 14      | /                             |
|  | 15 - 19      | 4 430                         |
|  | 20 - 24      | 41 270                        |
|  | 25 - 29      | 48 880                        |
|  | 30 - 34      | 49 580                        |
|  | 35 - 39      | 47 550                        |
|  | 40 - 44      | 63 300                        |
|  | 45 - 49      | 64 410                        |
|  | 50 - 54      | 52 740                        |
|  | 55 - 59      | 41 470                        |
|  | 60 - 64      | 35 100                        |
|  | 65 - 69      | 26 870                        |
|  | 70 - 74      | 23 790                        |
|  | 75 - 79      | 12 440                        |
|  | 80 - 84      | 6 530                         |
|  | 85 - 89      | 4 120                         |
|  | 90 und älter | 1 360                         |
|  | Insgesamt    | 315 480                       |
|  | Unter 5      | /                             |
|  | 5 - 9        | /                             |
|  | 10 - 14      | /                             |
|  | 15 - 19      | 1 870                         |
|  | 20 - 24      | 19 400                        |
|  | 25 - 29      | 24 410                        |
|  | 30 - 34      | 25 670                        |

Noch: Personen nach Alter (5er-Jahresgruppen), Höchster beruflicher Abschluss (ausführlich) und weitere Merkmale für Niedersachsen (Bundesland)

|  |              | Niedersachsen<br>(Bundesland) |
|--|--------------|-------------------------------|
|  | 35 - 39      | 27 740                        |
|  | 40 - 44      | 37 750                        |
|  | 45 - 49      | 39 440                        |
|  | 50 - 54      | 32 640                        |
|  | 55 - 59      | 26 440                        |
|  | 60 - 64      | 24 730                        |
|  | 65 - 69      | 20 710                        |
|  | 70 - 74      | 17 690                        |
|  | 75 - 79      | 9 270                         |
|  | 80 - 84      | 4 520                         |
|  | 85 - 89      | 2 550                         |
|  | 90 und älter | 660                           |
|  | Insgesamt    | 208 360                       |
|  | Unter 5      | /                             |
|  | 5 - 9        | /                             |
|  | 10 - 14      | /                             |
|  | 15 - 19      | 2 560                         |
|  | 20 - 24      | 21 870                        |
|  | 25 - 29      | 24 470                        |
|  | 30 - 34      | 23 920                        |
|  | 35 - 39      | 19 800                        |
|  | 40 - 44      | 25 550                        |
|  | 45 - 49      | 24 970                        |
|  | 50 - 54      | 20 100                        |
|  | 55 - 59      | 15 030                        |
|  | 60 - 64      | 10 380                        |
|  | 65 - 69      | 6 170                         |
|  | 70 - 74      | 6 100                         |
|  | 75 - 79      | 3 170                         |
|  | 80 - 84      | 2 010                         |
|  | 85 - 89      | 1 560                         |
|  | 90 und älter | 700                           |
|  | Insgesamt    | 41 480                        |
|  | Unter 5      | /                             |
|  | 5 - 9        | /                             |
|  | 10 - 14      | /                             |
|  | 15 - 19      | 3 900                         |
|  | 20 - 24      | 16 060                        |
|  | 25 - 29      | 4 490                         |
|  | 30 - 34      | 2 700                         |
|  | 35 - 39      | 2 810                         |
|  | 40 - 44      | 2 880                         |
|  | 45 - 49      | 2 440                         |
|  | 50 - 54      | 2 120                         |
|  | 55 - 59      | 1 330                         |
|  | 60 - 64      | 750                           |
|  | 65 - 69      | 610                           |
|  | 70 - 74      | 650                           |
|  | 75 - 79      | /                             |
|  | 80 - 84      | /                             |
|  | 85 - 89      | /                             |
|  | 90 und älter | /                             |
|  | Insgesamt    | 21 000                        |

Noch: Personen nach Alter (5er-Jahresgruppen), Höchster beruflicher Abschluss (ausfühlich) und weitere Merkmale für Niedersachsen (Bundesland)

|                                                | Niedersachsen<br>(Bundesland) |
|------------------------------------------------|-------------------------------|
| Unter 5                                        | /                             |
| 5 - 9                                          | /                             |
| 10 - 14                                        | /                             |
| 15 - 19                                        | 1 630                         |
| 20 - 24                                        | 8 180                         |
| 25 - 29                                        | 2 560                         |
| 30 - 34                                        | 1 240                         |
| 35 - 39                                        | 1 480                         |
| 40 - 44                                        | 1 690                         |
| 45 - 49                                        | 1 520                         |
| 50 - 54                                        | 1 140                         |
| 55 - 59                                        | 660                           |
| 60 - 64                                        | /                             |
| 65 - 69                                        | /                             |
| 70 - 74                                        | /                             |
| 75 - 79                                        | /                             |
| 80 - 84                                        | /                             |
| 85 - 89                                        | /                             |
| 90 und älter                                   | /                             |
| Insgesamt                                      | 20 480                        |
| Unter 5                                        | /                             |
| 5 - 9                                          | /                             |
| 10 - 14                                        | /                             |
| 15 - 19                                        | 2 270                         |
| 20 - 24                                        | 7 880                         |
| 25 - 29                                        | 1 940                         |
| 30 - 34                                        | 1 460                         |
| 35 - 39                                        | 1 330                         |
| 40 - 44                                        | 1 190                         |
| 45 - 49                                        | 920                           |
| 50 - 54                                        | 980                           |
| 55 - 59                                        | 670                           |
| 60 - 64                                        | /                             |
| 65 - 69                                        | 380                           |
| 70 - 74                                        | 400                           |
| 75 - 79                                        | /                             |
| 80 - 84                                        | /                             |
| 85 - 89                                        | /                             |
| 90 und älter                                   | /                             |
| Insgesamt                                      | 129 470                       |
| Unter 5                                        | /                             |
| 5 - 9                                          | /                             |
| 10 - 14                                        | /                             |
| 15 - 19                                        | /                             |
| 20 - 24                                        | 14 580                        |
| 25 - 29                                        | 21 550                        |
| 30 - 34                                        | 16 750                        |
| 35 - 39                                        | 14 810                        |
| 40 - 44                                        | 16 850                        |
| 45 - 49                                        | 16 340                        |
| 50 - 54                                        | 10 960                        |
| 55 - 59                                        | 6 480                         |
| 60 - 64                                        | 3 460                         |
| Lehre,<br>Berufsausbildung im<br>dualen System | Insgesamt                     |

Noch: Personen nach Alter (5er-Jahresgruppen), Höchster beruflicher Abschluss (ausfühlich) und weitere Merkmale für Niedersachsen (Bundesland)

|                    | Niedersachsen<br>(Bundesland) |
|--------------------|-------------------------------|
| 65 - 69            | 2 430                         |
| 70 - 74            | 2 280                         |
| 75 - 79            | 1 160                         |
| 80 - 84            | 640                           |
| 85 - 89            | 630                           |
| 90 und älter       | /                             |
| Insgesamt          | 67 680                        |
| Unter 5            | /                             |
| 5 - 9              | /                             |
| 10 - 14            | /                             |
| 15 - 19            | /                             |
| 20 - 24            | 7 320                         |
| 25 - 29            | 10 640                        |
| 30 - 34            | 8 320                         |
| 35 - 39            | 7 810                         |
| 40 - 44            | 8 270                         |
| 45 - 49            | 8 440                         |
| 50 - 54            | 6 370                         |
| 55 - 59            | 4 140                         |
| 60 - 64            | 2 230                         |
| 65 - 69            | 1 470                         |
| 70 - 74            | 1 160                         |
| 75 - 79            | 590                           |
| 80 - 84            | 380                           |
| 85 - 89            | /                             |
| 90 und älter       | /                             |
| Insgesamt          | 61 790                        |
| Unter 5            | /                             |
| 5 - 9              | /                             |
| 10 - 14            | /                             |
| 15 - 19            | /                             |
| 20 - 24            | 7 260                         |
| 25 - 29            | 10 910                        |
| 30 - 34            | 8 430                         |
| 35 - 39            | 7 000                         |
| 40 - 44            | 8 580                         |
| 45 - 49            | 7 900                         |
| 50 - 54            | 4 580                         |
| 55 - 59            | 2 330                         |
| 60 - 64            | 1 240                         |
| 65 - 69            | 950                           |
| 70 - 74            | 1 120                         |
| 75 - 79            | 570                           |
| 80 - 84            | /                             |
| 85 - 89            | /                             |
| 90 und älter       | /                             |
| Insgesamt          | 108 380                       |
| Unter 5            | /                             |
| 5 - 9              | /                             |
| 10 - 14            | /                             |
| 15 - 19            | /                             |
| 20 - 24            | 5 600                         |
| 25 - 29            | 10 350                        |
| Fachschulabschluss | Insgesamt                     |

Noch: Personen nach Alter (5er-Jahresgruppen), Höchster beruflicher Abschluss (ausführlich) und weitere Merkmale für Niedersachsen (Bundesland)

|          |              | Niedersachsen<br>(Bundesland) |
|----------|--------------|-------------------------------|
|          | 30 - 34      | 12 060                        |
|          | 35 - 39      | 11 090                        |
|          | 40 - 44      | 16 690                        |
|          | 45 - 49      | 16 060                        |
|          | 50 - 54      | 12 340                        |
|          | 55 - 59      | 7 970                         |
|          | 60 - 64      | 6 470                         |
|          | 65 - 69      | 3 440                         |
|          | 70 - 74      | 3 240                         |
|          | 75 - 79      | 1 510                         |
|          | 80 - 84      | 800                           |
|          | 85 - 89      | 440                           |
|          | 90 und älter | /                             |
|          | Insgesamt    | 63 470                        |
|          | Unter 5      | /                             |
|          | 5 - 9        | /                             |
|          | 10 - 14      | /                             |
|          | 15 - 19      | /                             |
|          | 20 - 24      | 1 920                         |
|          | 25 - 29      | 4 680                         |
|          | 30 - 34      | 6 290                         |
|          | 35 - 39      | 6 910                         |
| Männlich | 40 - 44      | 10 590                        |
|          | 45 - 49      | 10 010                        |
|          | 50 - 54      | 7 390                         |
|          | 55 - 59      | 4 770                         |
|          | 60 - 64      | 4 390                         |
|          | 65 - 69      | 2 590                         |
|          | 70 - 74      | 2 060                         |
|          | 75 - 79      | 1 040                         |
|          | 80 - 84      | 390                           |
|          | 85 - 89      | /                             |
|          | 90 und älter | /                             |
|          | Insgesamt    | 44 910                        |
|          | Unter 5      | /                             |
|          | 5 - 9        | /                             |
|          | 10 - 14      | /                             |
|          | 15 - 19      | /                             |
|          | 20 - 24      | 3 670                         |
|          | 25 - 29      | 5 670                         |
|          | 30 - 34      | 5 770                         |
|          | 35 - 39      | 4 170                         |
| Weiblich | 40 - 44      | 6 100                         |
|          | 45 - 49      | 6 040                         |
|          | 50 - 54      | 4 950                         |
|          | 55 - 59      | 3 210                         |
|          | 60 - 64      | 2 070                         |
|          | 65 - 69      | 850                           |
|          | 70 - 74      | 1 180                         |
|          | 75 - 79      | 470                           |
|          | 80 - 84      | 400                           |
|          | 85 - 89      | /                             |
|          | 90 und älter | /                             |

Noch: Personen nach Alter (5er-Jahresgruppen), Höchster beruflicher Abschluss (ausführlich) und weitere Merkmale für Niedersachsen (Bundesland)

|           |              | Niedersachsen<br>(Bundesland) |
|-----------|--------------|-------------------------------|
|           | Insgesamt    | 51 140                        |
|           | Unter 5      | /                             |
|           | 5 - 9        | /                             |
|           | 10 - 14      | /                             |
|           | 15 - 19      | /                             |
|           | 20 - 24      | 1 340                         |
|           | 25 - 29      | 2 480                         |
|           | 30 - 34      | 3 750                         |
|           | 35 - 39      | 4 510                         |
|           | 40 - 44      | 6 360                         |
| Insgesamt | 45 - 49      | 6 900                         |
|           | 50 - 54      | 5 610                         |
|           | 55 - 59      | 5 060                         |
|           | 60 - 64      | 5 310                         |
|           | 65 - 69      | 3 680                         |
|           | 70 - 74      | 2 970                         |
|           | 75 - 79      | 1 600                         |
|           | 80 - 84      | 920                           |
|           | 85 - 89      | 450                           |
|           | 90 und älter | /                             |
|           | Insgesamt    | 28 990                        |
|           | Unter 5      | /                             |
|           | 5 - 9        | /                             |
|           | 10 - 14      | /                             |
|           | 15 - 19      | /                             |
|           | 20 - 24      | 440                           |
|           | 25 - 29      | 1 150                         |
|           | 30 - 34      | 2 020                         |
|           | 35 - 39      | 2 290                         |
|           | 40 - 44      | 3 190                         |
|           | 45 - 49      | 4 050                         |
|           | 50 - 54      | 3 220                         |
|           | 55 - 59      | 3 070                         |
|           | 60 - 64      | 3 160                         |
|           | 65 - 69      | 2 640                         |
|           | 70 - 74      | 1 970                         |
|           | 75 - 79      | 1 090                         |
|           | 80 - 84      | 510                           |
|           | 85 - 89      | /                             |
|           | 90 und älter | /                             |
|           | Insgesamt    | 22 160                        |
|           | Unter 5      | /                             |
|           | 5 - 9        | /                             |
|           | 10 - 14      | /                             |
|           | 15 - 19      | /                             |
|           | 20 - 24      | 900                           |
|           | 25 - 29      | 1 340                         |
|           | 30 - 34      | 1 730                         |
|           | 35 - 39      | 2 220                         |
|           | 40 - 44      | 3 170                         |
|           | 45 - 49      | 2 850                         |
|           | 50 - 54      | 2 390                         |
|           | 55 - 59      | 1 990                         |

Noch: Personen nach Alter (5er-Jahresgruppen), Höchster beruflicher Abschluss (ausführlich) und weitere Merkmale für Niedersachsen (Bundesland)

|              | Niedersachsen<br>(Bundesland) |
|--------------|-------------------------------|
| 60 - 64      | 2 150                         |
| 65 - 69      | 1 040                         |
| 70 - 74      | 1 000                         |
| 75 - 79      | 500                           |
| 80 - 84      | 410                           |
| 85 - 89      | /                             |
| 90 und älter | /                             |
| Insgesamt    | 173 940                       |
| Unter 5      | /                             |
| 5 - 9        | /                             |
| 10 - 14      | /                             |
| 15 - 19      | /                             |
| 20 - 24      | 3 320                         |
| 25 - 29      | 8 380                         |
| 30 - 34      | 11 880                        |
| 35 - 39      | 12 640                        |
| 40 - 44      | 18 890                        |
| 45 - 49      | 20 500                        |
| 50 - 54      | 19 900                        |
| 55 - 59      | 18 550                        |
| 60 - 64      | 17 120                        |
| 65 - 69      | 15 350                        |
| 70 - 74      | 13 730                        |
| 75 - 79      | 7 200                         |
| 80 - 84      | 3 680                         |
| 85 - 89      | 2 220                         |
| 90 und älter | 560                           |
| Insgesamt    | 124 010                       |
| Unter 5      | /                             |
| 5 - 9        | /                             |
| 10 - 14      | /                             |
| 15 - 19      | /                             |
| 20 - 24      | 1 450                         |
| 25 - 29      | 4 730                         |
| 30 - 34      | 6 710                         |
| 35 - 39      | 8 580                         |
| 40 - 44      | 13 280                        |
| 45 - 49      | 14 180                        |
| 50 - 54      | 13 600                        |
| 55 - 59      | 12 370                        |
| 60 - 64      | 13 380                        |
| 65 - 69      | 12 800                        |
| 70 - 74      | 11 760                        |
| 75 - 79      | 6 030                         |
| 80 - 84      | 2 980                         |
| 85 - 89      | 1 700                         |
| 90 und älter | 460                           |
| Insgesamt    | 49 930                        |
| Unter 5      | /                             |
| 5 - 9        | /                             |
| 10 - 14      | /                             |
| 15 - 19      | /                             |
| 20 - 24      | 1 870                         |

Noch: Personen nach Alter (5er-Jahresgruppen), Höchster beruflicher Abschluss (ausführlich) und weitere Merkmale für Niedersachsen (Bundesland)

|              | Niedersachsen<br>(Bundesland) |
|--------------|-------------------------------|
| 25 - 29      | 3 650                         |
| 30 - 34      | 5 170                         |
| 35 - 39      | 4 060                         |
| 40 - 44      | 5 610                         |
| 45 - 49      | 6 330                         |
| 50 - 54      | 6 310                         |
| 55 - 59      | 6 180                         |
| 60 - 64      | 3 740                         |
| 65 - 69      | 2 550                         |
| 70 - 74      | 1 970                         |
| 75 - 79      | 1 170                         |
| 80 - 84      | 700                           |
| 85 - 89      | 520                           |
| 90 und älter | /                             |
| Insgesamt    | 18 060                        |
| Unter 5      | /                             |
| 5 - 9        | /                             |
| 10 - 14      | /                             |
| 15 - 19      | /                             |
| 20 - 24      | /                             |
| 25 - 29      | 1 610                         |
| 30 - 34      | 2 260                         |
| 35 - 39      | 1 500                         |
| 40 - 44      | 1 530                         |
| 45 - 49      | 2 070                         |
| 50 - 54      | 1 740                         |
| 55 - 59      | 1 970                         |
| 60 - 64      | 1 850                         |
| 65 - 69      | 1 260                         |
| 70 - 74      | 820                           |
| 75 - 79      | 630                           |
| 80 - 84      | /                             |
| 85 - 89      | /                             |
| 90 und älter | /                             |
| Insgesamt    | 9 460                         |
| Unter 5      | /                             |
| 5 - 9        | /                             |
| 10 - 14      | /                             |
| 15 - 19      | /                             |
| 20 - 24      | /                             |
| 25 - 29      | 650                           |
| 30 - 34      | 1 010                         |
| 35 - 39      | 550                           |
| 40 - 44      | 680                           |
| 45 - 49      | 1 180                         |
| 50 - 54      | 860                           |
| 55 - 59      | 1 370                         |
| 60 - 64      | 1 190                         |
| 65 - 69      | 880                           |
| 70 - 74      | 420                           |
| 75 - 79      | /                             |
| 80 - 84      | /                             |
| 85 - 89      | /                             |

Noch: Personen nach Alter (5er-Jahresgruppen), Höchster beruflicher Abschluss (ausführlich) und weitere Merkmale für Niedersachsen (Bundesland)

|           |              | Niedersachsen<br>(Bundesland) |
|-----------|--------------|-------------------------------|
| Weiblich  | 90 und älter | /                             |
|           | Insgesamt    | 8 610                         |
|           | Unter 5      | /                             |
|           | 5 - 9        | /                             |
|           | 10 - 14      | /                             |
|           | 15 - 19      | /                             |
|           | 20 - 24      | /                             |
|           | 25 - 29      | 960                           |
|           | 30 - 34      | 1 250                         |
|           | 35 - 39      | 960                           |
|           | 40 - 44      | 850                           |
|           | 45 - 49      | 890                           |
|           | 50 - 54      | 870                           |
|           | 55 - 59      | 600                           |
|           | 60 - 64      | 670                           |
|           | 65 - 69      | /                             |
|           | 70 - 74      | 400                           |
|           | 75 - 79      | /                             |
|           | 80 - 84      | /                             |
|           | 85 - 89      | /                             |
| Insgesamt | 90 und älter | /                             |
|           | Insgesamt    | 1 360                         |
|           | Unter 5      | /                             |
|           | 5 - 9        | /                             |
|           | 10 - 14      | /                             |
|           | 15 - 19      | /                             |
|           | 20 - 24      | /                             |
|           | 25 - 29      | /                             |
|           | 30 - 34      | /                             |
|           | 35 - 39      | /                             |
|           | 40 - 44      | /                             |
|           | 45 - 49      | /                             |
|           | 50 - 54      | /                             |
|           | 55 - 59      | /                             |
|           | 60 - 64      | /                             |
|           | 65 - 69      | /                             |
|           | 70 - 74      | /                             |
|           | 75 - 79      | /                             |
|           | 80 - 84      | /                             |
|           | 85 - 89      | /                             |
| Männlich  | 90 und älter | /                             |
|           | Insgesamt    | 870                           |
|           | Unter 5      | /                             |
|           | 5 - 9        | /                             |
|           | 10 - 14      | /                             |
|           | 15 - 19      | /                             |
|           | 20 - 24      | /                             |
|           | 25 - 29      | /                             |
|           | 30 - 34      | /                             |
|           | 35 - 39      | /                             |
|           | 40 - 44      | /                             |
|           | 45 - 49      | /                             |
|           | 50 - 54      | /                             |

Noch: Personen nach Alter (5er-Jahresgruppen), Höchster beruflicher Abschluss (ausführlich) und weitere Merkmale für Niedersachsen (Bundesland)

|           |              | Niedersachsen<br>(Bundesland) |
|-----------|--------------|-------------------------------|
| Weiblich  | 55 - 59      | /                             |
|           | 60 - 64      | /                             |
|           | 65 - 69      | /                             |
|           | 70 - 74      | /                             |
|           | 75 - 79      | /                             |
|           | 80 - 84      | /                             |
|           | 85 - 89      | /                             |
|           | 90 und älter | /                             |
|           | Insgesamt    | /                             |
|           | Unter 5      | /                             |
|           | 5 - 9        | /                             |
|           | 10 - 14      | /                             |
|           | 15 - 19      | /                             |
|           | 20 - 24      | /                             |
|           | 25 - 29      | /                             |
|           | 30 - 34      | /                             |
|           | 35 - 39      | /                             |
|           | 40 - 44      | /                             |
|           | 45 - 49      | /                             |
|           | 50 - 54      | /                             |
|           | 55 - 59      | /                             |
| Insgesamt | 60 - 64      | /                             |
|           | 65 - 69      | /                             |
|           | 70 - 74      | /                             |
|           | 75 - 79      | /                             |
|           | 80 - 84      | /                             |
|           | 85 - 89      | /                             |
|           | 90 und älter | /                             |
|           | Insgesamt    | 1 123 670                     |
|           | Unter 5      | /                             |
|           | 5 - 9        | /                             |
|           | 10 - 14      | /                             |
|           | 15 - 19      | 9 790                         |
|           | 20 - 24      | 128 740                       |
|           | 25 - 29      | 118 000                       |
|           | 30 - 34      | 110 910                       |
|           | 35 - 39      | 108 570                       |
|           | 40 - 44      | 132 440                       |
|           | 45 - 49      | 137 050                       |
|           | 50 - 54      | 107 980                       |
|           | 55 - 59      | 80 490                        |
|           | 60 - 64      | 59 550                        |
|           | 65 - 69      | 42 830                        |
|           | 70 - 74      | 36 410                        |
|           | 75 - 79      | 20 500                        |
|           | 80 - 84      | 17 130                        |
|           | 85 - 89      | 9 860                         |
|           | 90 und älter | 3 420                         |
|           | Insgesamt    | 558 520                       |
|           | Unter 5      | /                             |
|           | 5 - 9        | /                             |
|           | 10 - 14      | /                             |
|           | 15 - 19      | 3 540                         |

Noch: Personen nach Alter (5er-Jahresgruppen), Höchster beruflicher Abschluss (ausführlich) und weitere Merkmale für Niedersachsen (Bundesland)

|                            |              | Niedersachsen<br>(Bundesland) |
|----------------------------|--------------|-------------------------------|
|                            | 20 - 24      | 56 620                        |
|                            | 25 - 29      | 52 260                        |
|                            | 30 - 34      | 50 080                        |
|                            | 35 - 39      | 52 590                        |
|                            | 40 - 44      | 63 890                        |
|                            | 45 - 49      | 69 070                        |
|                            | 50 - 54      | 55 070                        |
|                            | 55 - 59      | 43 960                        |
|                            | 60 - 64      | 34 660                        |
|                            | 65 - 69      | 25 900                        |
|                            | 70 - 74      | 22 340                        |
|                            | 75 - 79      | 12 900                        |
|                            | 80 - 84      | 9 070                         |
|                            | 85 - 89      | 5 080                         |
|                            | 90 und älter | 1 490                         |
|                            | Insgesamt    | 565 160                       |
|                            | Unter 5      | /                             |
|                            | 5 - 9        | /                             |
|                            | 10 - 14      | /                             |
|                            | 15 - 19      | 6 250                         |
|                            | 20 - 24      | 72 110                        |
|                            | 25 - 29      | 65 740                        |
|                            | 30 - 34      | 60 830                        |
|                            | 35 - 39      | 55 990                        |
|                            | 40 - 44      | 68 550                        |
| Weiblich                   | 45 - 49      | 67 980                        |
|                            | 50 - 54      | 52 920                        |
|                            | 55 - 59      | 36 530                        |
|                            | 60 - 64      | 24 890                        |
|                            | 65 - 69      | 16 930                        |
|                            | 70 - 74      | 14 070                        |
|                            | 75 - 79      | 7 600                         |
|                            | 80 - 84      | 8 070                         |
|                            | 85 - 89      | 4 780                         |
|                            | 90 und älter | 1 930                         |
|                            | Insgesamt    | 187 890                       |
|                            | Unter 5      | /                             |
|                            | 5 - 9        | /                             |
|                            | 10 - 14      | /                             |
|                            | 15 - 19      | 9 600                         |
|                            | 20 - 24      | 95 150                        |
|                            | 25 - 29      | 24 600                        |
|                            | 30 - 34      | 9 790                         |
|                            | 35 - 39      | 7 500                         |
| Ohne beruflichen Abschluss | 40 - 44      | 8 080                         |
|                            | 45 - 49      | 9 360                         |
|                            | 50 - 54      | 7 710                         |
|                            | 55 - 59      | 4 780                         |
|                            | 60 - 64      | 2 570                         |
|                            | 65 - 69      | 1 870                         |
|                            | 70 - 74      | 1 770                         |
|                            | 75 - 79      | 1 060                         |
|                            | 80 - 84      | 1 950                         |

Noch: Personen nach Alter (5er-Jahresgruppen), Höchster beruflicher Abschluss (ausführlich) und weitere Merkmale für Niedersachsen (Bundesland)

|                                          |              | Niedersachsen<br>(Bundesland) |
|------------------------------------------|--------------|-------------------------------|
|                                          | 85 - 89      | 1 700                         |
|                                          | 90 und älter | 420                           |
|                                          | Insgesamt    | 91 500                        |
|                                          | Unter 5      | /                             |
|                                          | 5 - 9        | /                             |
|                                          | 10 - 14      | /                             |
|                                          | 15 - 19      | 3 470                         |
|                                          | 20 - 24      | 43 910                        |
|                                          | 25 - 29      | 14 550                        |
|                                          | 30 - 34      | 5 640                         |
|                                          | 35 - 39      | 4 190                         |
|                                          | 40 - 44      | 4 350                         |
| Männlich                                 | 45 - 49      | 5 020                         |
|                                          | 50 - 54      | 4 060                         |
|                                          | 55 - 59      | 2 420                         |
|                                          | 60 - 64      | 1 120                         |
|                                          | 65 - 69      | 900                           |
|                                          | 70 - 74      | 560                           |
|                                          | 75 - 79      | /                             |
|                                          | 80 - 84      | 410                           |
|                                          | 85 - 89      | 590                           |
|                                          | 90 und älter | /                             |
|                                          | Insgesamt    | 96 400                        |
|                                          | Unter 5      | /                             |
|                                          | 5 - 9        | /                             |
|                                          | 10 - 14      | /                             |
|                                          | 15 - 19      | 6 130                         |
|                                          | 20 - 24      | 51 240                        |
|                                          | 25 - 29      | 10 050                        |
|                                          | 30 - 34      | 4 140                         |
|                                          | 35 - 39      | 3 300                         |
|                                          | 40 - 44      | 3 720                         |
| Weiblich                                 | 45 - 49      | 4 340                         |
|                                          | 50 - 54      | 3 650                         |
|                                          | 55 - 59      | 2 360                         |
|                                          | 60 - 64      | 1 450                         |
|                                          | 65 - 69      | 970                           |
|                                          | 70 - 74      | 1 210                         |
|                                          | 75 - 79      | 810                           |
|                                          | 80 - 84      | 1 540                         |
|                                          | 85 - 89      | 1 110                         |
|                                          | 90 und älter | 370                           |
|                                          | Insgesamt    | 182 970                       |
|                                          | Unter 5      | /                             |
|                                          | 5 - 9        | /                             |
|                                          | 10 - 14      | /                             |
|                                          | 15 - 19      | /                             |
| Lehre, Berufsausbildung im dualen System | 20 - 24      | 16 610                        |
|                                          | 25 - 29      | 25 050                        |
|                                          | 30 - 34      | 21 030                        |
|                                          | 35 - 39      | 22 270                        |
|                                          | 40 - 44      | 27 450                        |
|                                          | 45 - 49      | 27 030                        |

Noch: Personen nach Alter (5er-Jahresgruppen), Höchster beruflicher Abschluss (ausführlich) und weitere Merkmale für Niedersachsen (Bundesland)

|                    |              | Niedersachsen<br>(Bundesland) |
|--------------------|--------------|-------------------------------|
|                    | 50 - 54      | 16 890                        |
|                    | 55 - 59      | 8 320                         |
|                    | 60 - 64      | 4 270                         |
|                    | 65 - 69      | 2 980                         |
|                    | 70 - 74      | 3 210                         |
|                    | 75 - 79      | 2 890                         |
|                    | 80 - 84      | 2 630                         |
|                    | 85 - 89      | 1 430                         |
|                    | 90 und älter | 740                           |
|                    | Insgesamt    | 76 760                        |
|                    | Unter 5      | /                             |
|                    | 5 - 9        | /                             |
|                    | 10 - 14      | /                             |
|                    | 15 - 19      | /                             |
|                    | 20 - 24      | 6 460                         |
|                    | 25 - 29      | 10 340                        |
|                    | 30 - 34      | 8 200                         |
|                    | 35 - 39      | 9 280                         |
|                    | 40 - 44      | 10 380                        |
| Männlich           | 45 - 49      | 10 520                        |
|                    | 50 - 54      | 7 380                         |
|                    | 55 - 59      | 4 710                         |
|                    | 60 - 64      | 2 330                         |
|                    | 65 - 69      | 1 620                         |
|                    | 70 - 74      | 1 790                         |
|                    | 75 - 79      | 1 370                         |
|                    | 80 - 84      | 1 230                         |
|                    | 85 - 89      | 780                           |
|                    | 90 und älter | /                             |
|                    | Insgesamt    | 106 200                       |
|                    | Unter 5      | /                             |
|                    | 5 - 9        | /                             |
|                    | 10 - 14      | /                             |
|                    | 15 - 19      | /                             |
|                    | 20 - 24      | 10 150                        |
|                    | 25 - 29      | 14 710                        |
|                    | 30 - 34      | 12 820                        |
|                    | 35 - 39      | 12 990                        |
|                    | 40 - 44      | 17 070                        |
| Weiblich           | 45 - 49      | 16 510                        |
|                    | 50 - 54      | 9 510                         |
|                    | 55 - 59      | 3 620                         |
|                    | 60 - 64      | 1 940                         |
|                    | 65 - 69      | 1 360                         |
|                    | 70 - 74      | 1 430                         |
|                    | 75 - 79      | 1 520                         |
|                    | 80 - 84      | 1 410                         |
|                    | 85 - 89      | 650                           |
|                    | 90 und älter | 410                           |
|                    | Insgesamt    | 90 540                        |
| Fachschulabschluss | Unter 5      | /                             |
|                    | 5 - 9        | /                             |
|                    | 10 - 14      | /                             |

Noch: Personen nach Alter (5er-Jahresgruppen), Höchster beruflicher Abschluss (ausführlich) und weitere Merkmale für Niedersachsen (Bundesland)

|          |              | Niedersachsen<br>(Bundesland) |
|----------|--------------|-------------------------------|
|          | 15 - 19      | /                             |
|          | 20 - 24      | 3 770                         |
|          | 25 - 29      | 8 830                         |
|          | 30 - 34      | 9 650                         |
|          | 35 - 39      | 10 260                        |
|          | 40 - 44      | 13 990                        |
|          | 45 - 49      | 14 700                        |
|          | 50 - 54      | 10 620                        |
|          | 55 - 59      | 6 290                         |
|          | 60 - 64      | 3 650                         |
|          | 65 - 69      | 2 190                         |
|          | 70 - 74      | 1 940                         |
|          | 75 - 79      | 1 470                         |
|          | 80 - 84      | 1 790                         |
|          | 85 - 89      | 1 030                         |
|          | 90 und älter | 320                           |
|          | Insgesamt    | 34 250                        |
|          | Unter 5      | /                             |
|          | 5 - 9        | /                             |
|          | 10 - 14      | /                             |
|          | 15 - 19      | /                             |
|          | 20 - 24      | 960                           |
|          | 25 - 29      | 2 640                         |
|          | 30 - 34      | 3 540                         |
|          | 35 - 39      | 3 830                         |
|          | 40 - 44      | 5 530                         |
| Männlich | 45 - 49      | 5 840                         |
|          | 50 - 54      | 4 350                         |
|          | 55 - 59      | 2 860                         |
|          | 60 - 64      | 1 680                         |
|          | 65 - 69      | 800                           |
|          | 70 - 74      | 750                           |
|          | 75 - 79      | 500                           |
|          | 80 - 84      | 550                           |
|          | 85 - 89      | /                             |
|          | 90 und älter | /                             |
|          | Insgesamt    | 56 290                        |
|          | Unter 5      | /                             |
|          | 5 - 9        | /                             |
|          | 10 - 14      | /                             |
|          | 15 - 19      | /                             |
|          | 20 - 24      | 2 800                         |
|          | 25 - 29      | 6 190                         |
|          | 30 - 34      | 6 110                         |
|          | 35 - 39      | 6 430                         |
|          | 40 - 44      | 8 460                         |
|          | 45 - 49      | 8 860                         |
|          | 50 - 54      | 6 270                         |
|          | 55 - 59      | 3 440                         |
|          | 60 - 64      | 1 970                         |
|          | 65 - 69      | 1 400                         |
|          | 70 - 74      | 1 190                         |
|          | 75 - 79      | 970                           |

Noch: Personen nach Alter (5er-Jahresgruppen), Höchster beruflicher Abschluss (ausführlich) und weitere Merkmale für Niedersachsen (Bundesland)

|              |                                                        | Niedersachsen<br>(Bundesland) |
|--------------|--------------------------------------------------------|-------------------------------|
|              | 80 - 84                                                | 1 230                         |
|              | 85 - 89                                                | 700                           |
|              | 90 und älter                                           | /                             |
|              | Insgesamt                                              | 30 990                        |
|              | Unter 5                                                | /                             |
|              | 5 - 9                                                  | /                             |
|              | 10 - 14                                                | /                             |
|              | 15 - 19                                                |                               |
|              | 20 - 24                                                | 1 590                         |
|              | 25 - 29                                                | 3 480                         |
|              | 30 - 34                                                | 4 470                         |
|              | 35 - 39                                                | 4 230                         |
|              | 40 - 44                                                | 5 040                         |
|              | Insgesamt                                              |                               |
|              | 45 - 49                                                | 3 950                         |
|              | 50 - 54                                                | 2 570                         |
|              | 55 - 59                                                | 1 390                         |
|              | 60 - 64                                                | 1 230                         |
|              | 65 - 69                                                | 1 130                         |
|              | 70 - 74                                                | 770                           |
|              | 75 - 79                                                | 340                           |
|              | 80 - 84                                                | 300                           |
|              | 85 - 89                                                | 430                           |
|              | 90 und älter                                           | /                             |
|              | Insgesamt                                              | 14 990                        |
|              | Unter 5                                                | /                             |
|              | 5 - 9                                                  | /                             |
|              | 10 - 14                                                | /                             |
|              | Abschluss einer<br>Fachakademie oder<br>Berufsakademie | /                             |
|              | 15 - 19                                                | /                             |
|              | 20 - 24                                                | 850                           |
|              | 25 - 29                                                | 1 250                         |
| 30 - 34      | 1 700                                                  |                               |
| 35 - 39      | 2 260                                                  |                               |
| 40 - 44      | 2 620                                                  |                               |
| Männlich     |                                                        |                               |
| 45 - 49      | 2 050                                                  |                               |
| 50 - 54      | 1 360                                                  |                               |
| 55 - 59      | 740                                                    |                               |
| 60 - 64      | 490                                                    |                               |
| 65 - 69      | 670                                                    |                               |
| 70 - 74      | 400                                                    |                               |
| 75 - 79      | /                                                      |                               |
| 80 - 84      | /                                                      |                               |
| 85 - 89      | /                                                      |                               |
| 90 und älter | /                                                      |                               |
| Insgesamt    | 16 000                                                 |                               |
| Unter 5      | /                                                      |                               |
| 5 - 9        | /                                                      |                               |
| 10 - 14      | /                                                      |                               |
| 15 - 19      | /                                                      |                               |
| Weiblich     |                                                        |                               |
| 20 - 24      | 730                                                    |                               |
| 25 - 29      | 2 230                                                  |                               |
| 30 - 34      | 2 770                                                  |                               |
| 35 - 39      | 1 970                                                  |                               |
| 40 - 44      | 2 422                                                  |                               |

|                            |              | Niedersachsen<br>(Bundesland) |
|----------------------------|--------------|-------------------------------|
|                            | 45 - 49      | 1 890                         |
|                            | 50 - 54      | 1 210                         |
|                            | 55 - 59      | 650                           |
|                            | 60 - 64      | 740                           |
|                            | 65 - 69      | 460                           |
|                            | 70 - 74      | /                             |
|                            | 75 - 79      | /                             |
|                            | 80 - 84      | /                             |
|                            | 85 - 89      | /                             |
|                            | 90 und älter | /                             |
|                            | Insgesamt    | 152 080                       |
|                            | Unter 5      | /                             |
|                            | 5 - 9        | /                             |
|                            | 10 - 14      | /                             |
|                            | 15 - 19      | /                             |
|                            | 20 - 24      | 2 310                         |
|                            | 25 - 29      | 13 270                        |
|                            | 30 - 34      | 18 170                        |
|                            | 35 - 39      | 17 670                        |
|                            | Insgesamt    | 21 530                        |
|                            | 45 - 49      | 23 440                        |
|                            | 50 - 54      | 19 120                        |
|                            | 55 - 59      | 12 080                        |
|                            | 60 - 64      | 7 850                         |
|                            | 65 - 69      | 5 370                         |
| 70 - 74                    | 5 220        |                               |
| 75 - 79                    | 2 690        |                               |
| 80 - 84                    | 1 890        |                               |
| 85 - 89                    | 1 120        |                               |
| 90 und älter               | 370          |                               |
| Insgesamt                  | 89 790       |                               |
| Fachhochschulabschl<br>uss | Unter 5      | /                             |
|                            | 5 - 9        | /                             |
|                            | 10 - 14      | /                             |
|                            | 15 - 19      | /                             |
|                            | 20 - 24      | 1 080                         |
|                            | 25 - 29      | 6 620                         |
|                            | 30 - 34      | 10 130                        |
|                            | 35 - 39      | 10 160                        |
|                            | 40 - 44      | 12 100                        |
| Männlich                   | 45 - 49      | 14 550                        |
|                            | 50 - 54      | 11 260                        |
|                            | 55 - 59      | 7 180                         |
|                            | 60 - 64      | 5 410                         |
|                            | 65 - 69      | 3 420                         |
|                            | 70 - 74      | 3 600                         |
|                            | 75 - 79      | 2 080                         |
|                            | 80 - 84      | 1 260                         |
|                            | 85 - 89      | 730                           |
|                            | 90 und älter | /                             |
|                            | Insgesamt    | 62 290                        |
| Weiblich                   | Unter 5      | /                             |
|                            | 5 - 9        | /                             |

Noch: Personen nach Alter (5er-Jahresgruppen), Höchster beruflicher Abschluss (ausführlich) und weitere Merkmale für Niedersachsen (Bundesland)

|              | Niedersachsen<br>(Bundesland) |
|--------------|-------------------------------|
| 10 - 14      | /                             |
| 15 - 19      | /                             |
| 20 - 24      | 1 230                         |
| 25 - 29      | 6 640                         |
| 30 - 34      | 8 040                         |
| 35 - 39      | 7 510                         |
| 40 - 44      | 9 430                         |
| 45 - 49      | 8 900                         |
| 50 - 54      | 7 860                         |
| 55 - 59      | 4 900                         |
| 60 - 64      | 2 440                         |
| 65 - 69      | 1 950                         |
| 70 - 74      | 1 620                         |
| 75 - 79      | 600                           |
| 80 - 84      | 620                           |
| 85 - 89      | 380                           |
| 90 und älter | /                             |
| Insgesamt    | 413 810                       |
| Unter 5      | /                             |
| 5 - 9        | /                             |
| 10 - 14      | /                             |
| 15 - 19      | /                             |
| 20 - 24      | 9 160                         |
| 25 - 29      | 41 400                        |
| 30 - 34      | 42 840                        |
| 35 - 39      | 39 480                        |
| 40 - 44      | 48 350                        |
| 45 - 49      | 49 270                        |
| 50 - 54      | 42 960                        |
| 55 - 59      | 41 200                        |
| 60 - 64      | 34 850                        |
| 65 - 69      | 24 750                        |
| 70 - 74      | 19 080                        |
| 75 - 79      | 9 300                         |
| 80 - 84      | 6 610                         |
| 85 - 89      | 3 440                         |
| 90 und älter | 1 120                         |
| Insgesamt    | 206 050                       |
| Unter 5      | /                             |
| 5 - 9        | /                             |
| 10 - 14      | /                             |
| 15 - 19      | /                             |
| 20 - 24      | 3 210                         |
| 25 - 29      | 16 370                        |
| 30 - 34      | 18 460                        |
| 35 - 39      | 18 710                        |
| 40 - 44      | 23 520                        |
| 45 - 49      | 24 950                        |
| 50 - 54      | 21 120                        |
| 55 - 59      | 21 200                        |
| 60 - 64      | 19 470                        |
| 65 - 69      | 14 800                        |
| 70 - 74      | 11 610                        |

Noch: Personen nach Alter (5er-Jahresgruppen), Höchster beruflicher Abschluss (ausführlich) und weitere Merkmale für Niedersachsen (Bundesland)

|              | Niedersachsen<br>(Bundesland) |
|--------------|-------------------------------|
| 75 - 79      | 6 270                         |
| 80 - 84      | 3 890                         |
| 85 - 89      | 1 940                         |
| 90 und älter | 530                           |
| Insgesamt    | 207 760                       |
| Unter 5      | /                             |
| 5 - 9        | /                             |
| 10 - 14      | /                             |
| 15 - 19      | /                             |
| 20 - 24      | 5 950                         |
| 25 - 29      | 25 030                        |
| 30 - 34      | 24 380                        |
| 35 - 39      | 20 770                        |
| 40 - 44      | 24 820                        |
| 45 - 49      | 24 320                        |
| 50 - 54      | 21 840                        |
| 55 - 59      | 19 990                        |
| 60 - 64      | 15 380                        |
| 65 - 69      | 9 950                         |
| 70 - 74      | 7 460                         |
| 75 - 79      | 3 030                         |
| 80 - 84      | 2 720                         |
| 85 - 89      | 1 500                         |
| 90 und älter | 590                           |
| Insgesamt    | 65 390                        |
| Unter 5      | /                             |
| 5 - 9        | /                             |
| 10 - 14      | /                             |
| 15 - 19      | /                             |
| 20 - 24      | /                             |
| 25 - 29      | 1 370                         |
| 30 - 34      | 4 960                         |
| 35 - 39      | 7 170                         |
| 40 - 44      | 8 010                         |
| 45 - 49      | 9 290                         |
| 50 - 54      | 8 110                         |
| 55 - 59      | 6 430                         |
| 60 - 64      | 5 140                         |
| 65 - 69      | 4 540                         |
| 70 - 74      | 4 420                         |
| 75 - 79      | 2 750                         |
| 80 - 84      | 1 970                         |
| 85 - 89      | 710                           |
| 90 und älter | 380                           |
| Insgesamt    | 45 170                        |
| Unter 5      | /                             |
| 5 - 9        | /                             |
| 10 - 14      | /                             |
| 15 - 19      | /                             |
| 20 - 24      | /                             |
| 25 - 29      | 480                           |
| 30 - 34      | 2 390                         |
| 35 - 39      | 4 160                         |

Noch: Personen nach Alter (5er-Jahresgruppen), Höchster beruflicher Abschluss (ausführlich) und weitere Merkmale für Niedersachsen (Bundesland)

|              | Niedersachsen<br>(Bundesland) |
|--------------|-------------------------------|
| 40 - 44      | 5 380                         |
| 45 - 49      | 6 130                         |
| 50 - 54      | 5 540                         |
| 55 - 59      | 4 850                         |
| 60 - 64      | 4 170                         |
| 65 - 69      | 3 700                         |
| 70 - 74      | 3 640                         |
| 75 - 79      | 2 270                         |
| 80 - 84      | 1 590                         |
| 85 - 89      | 480                           |
| 90 und älter | /                             |
| Insgesamt    | 20 210                        |
| Unter 5      | /                             |
| 5 - 9        | /                             |
| 10 - 14      | /                             |
| 15 - 19      | /                             |
| 20 - 24      | /                             |
| 25 - 29      | 890                           |
| 30 - 34      | 2 570                         |
| 35 - 39      | 3 010                         |
| 40 - 44      | 2 630                         |
| 45 - 49      | 3 160                         |
| 50 - 54      | 2 580                         |
| 55 - 59      | 1 580                         |
| 60 - 64      | 970                           |
| 65 - 69      | 840                           |
| 70 - 74      | 780                           |
| 75 - 79      | 480                           |
| 80 - 84      | 380                           |
| 85 - 89      | /                             |
| 90 und älter | /                             |

Für die Bevölkerung in bestimmten Gemeinschafts- und Anstaltsunterkünften (sog. „sensible Sonderbereiche“) liegen keine Informationen zu sozioökonomischen Strukturmerkmalen (beispielsweise Schul- und Berufsbildung) oder zum Migrationshintergrund vor. Aus diesem Grund können die Summen der Merkmalsausprägungen von der Gesamteinwohnerzahl der ausgewählten regionalen Einheit abweichen.

Die Berechnung der Ergebnisse zum „Erwerbsstatus“, zur „Stellung im Beruf“ und zum „Wirtschaftszweig“ erfolgte durch kombinierte Erwerbsregisterausählung und Hochrechnung der Daten aus der Haushaltsstichprobe. Daher weichen diese von den ausschließlich aus der Haushaltsstichprobe hochgerechneten Ergebnissen ab.

Im Ausland tätige Angehörige der Bundeswehr, der Polizeibehörden und des Auswärtigen Dienstes sowie ihre dort ansässigen Familien werden für dieses Ergebnis nicht berücksichtigt.

Die dargestellten Summenwerte werden stets auf Basis der ungerundeten Ausgangswerte ermittelt, weshalb diese von der Summe der ausgewiesenen Einzelwerte abweichen können.

Die relativen Ergebnisse beziehen sich auf die jeweilige Teilgesamtheit des betrachteten Merkmals der jeweiligen regionalen Einheit. Die relativen Werte wurden durch Division von Ergebnissen nach Durchführung der Geheimhaltung errechnet.

Beim Nachweis der Bevölkerung nach "Höchstem beruflichen Abschluss (ausführlich)" werden ausschließlich Personen im Alter von 15 Jahren und älter berücksichtigt.

Beim Nachweis der Bevölkerung nach "Höchstem Schulabschluss" werden ausschließlich Personen im Alter von 15 Jahren und älter berücksichtigt.

Einführung

Der Zensus 2011 ist eine Bevölkerungs-, Gebäude- und Wohnungszählung. Dabei werden – soweit möglich – bereits vorhandene Daten aus Verwaltungsregistern für statistische Zwecke genutzt. Eine Haushaltebefragung auf Stichprobenbasis, eine Vollerhebung aller an Anschriften mit Sonderbereichen lebenden Personen (Wohnheime und Gemeinschaftsunterkünfte) sowie eine postalische Befragung zu Gebäude- und Wohnungsdaten bei den Eigentümerinnen und Eigentümern oder Verwalterinnen und Verwaltern ergänzen und korrigieren die Informationen aus den Registern. Eine traditionelle Volkszählung inklusive einer Gebäude- und Wohnungszählung wurde in den alten Bundesländern letztmalig 1987, in der DDR letztmalig 1981 durchgeführt. Eine Gebäude- und Wohnungszählung fand nach der Wiedervereinigung nur in den neuen Bundesländern im Jahr 1995 statt.

Ziel des Zensus 2011 war zum einen die Ermittlung der amtlichen Einwohnerzahlen zum Stichtag 9. Mai 2011. Zum anderen wurden wichtige Strukturinformationen erhoben, welche eine umfassende Datengrundlage bieten, wie die Menschen in Deutschland leben, wohnen und arbeiten.

Die Zensusdatenbank präsentiert Ergebnisse des Zensus 2011 nach Abschluss der Datenaufbereitung.

Rechtliche Grundlagen

Die rechtlichen Grundlagen des Zensus 2011 bilden

- die Verordnung Europäische Gemeinschaft (EG) Nummer 763/2008 des Europäischen Parlaments und des Rates vom 9. Juli 2008 über Volks- und Wohnungszählungen,
- das Zensusvorbereitungsgesetz (ZensVorbG 2011),
- das Zensusgesetz 2011 (ZensG 2011),
- die Stichprobenverordnung Zensusgesetz 2011 (StichprobenV),
- sowie die jeweiligen landesrechtlichen Regelungen zur Ausführung des ZensG 2011.

Nach § 1 Abs. 1 ZensG 2011 führten die Statistischen Ämter des Bundes und der Länder eine Bevölkerungs-, Gebäude- und Wohnungszählung (Zensus) mit Stand zum 9. Mai 2011 (Berichtszeitpunkt) als Bundesstatistik durch.

Gemäß § 1 Abs. 3 ZensG 2011 dient der Zensus unter anderem der Gewinnung von Grunddaten für das Gesamtsystem der amtlichen Statistik sowie von Strukturdaten über die Bevölkerung als Datengrundlage für vielfältige politische Entscheidungen.

Die nachstehend veröffentlichten Ergebnisse wurden auf Basis folgender Register, Erhebungen und statistischer Verfahren ermittelt:

- Daten gemäß Übermittlung durch die Meldebehörden und durch oberste Bundesbehörden (§ 3 ZensG 2011),
- Daten gemäß Übermittlung durch die Bundesagentur für Arbeit (§ 4 ZensG 2011),
- Daten gemäß Übermittlung durch die nach dem Finanz- und Personalstatistikgesetz auskunftspflichtigen Stellen (§ 5 ZensG 2011),
- Daten aus der Gebäude- und Wohnungszählung (§ 6 ZensG 2011),
- Daten aus der Haushaltebefragung auf Stichprobenbasis (§ 7 ZensG 2011),
- Daten aus der Erhebung an Anschriften mit Sonderbereichen (§ 8 ZensG 2011),
- Daten aus der Zusammenführung der Datensätze und Haushaltegenerierung (§ 9 Abs. 3 ZensG 2011),
- Daten aus der Mehrfachfalluntersuchung (§ 15 ZensG 2011),
- Daten aus der Befragung zur Klärung von Unstimmigkeiten (§ 16 ZensG 2011).

Methode

Beim Zensus 2011 kam in Deutschland erstmals ein neues registergestütztes Verfahren zum Einsatz. Dabei wurden bereits vorhandene Registerdaten verwendet und mit den Ergebnissen unterschiedlicher Befragungen ergänzt und korrigiert. Zur Gewinnung von Angaben, die nicht aus Registern gewonnen werden konnten sowie zur Sicherung der Qualität der Ergebnisse, wurden bundesweit knapp zehn Prozent aller Personen im Rahmen der Haushaltebefragung auf Stichprobenbasis befragt. Dafür wurden nach einem mathematischen Zufallsverfahren Anschriften ausgewählt, an denen alle dort lebenden Personen befragt wurden.

Da es in Deutschland zu Gebäude- und Wohnungsdaten keine flächendeckenden Register gibt, wurden die Angaben zu Gebäuden und Wohnungen durch eine postalische Befragung der Eigentümerinnen und Eigentümer oder Verwalterinnen und Verwalter von Gebäuden und Wohnungen sowie bewohnten Unterkünften gewonnen. Die zum Stichtag 9. Mai 2011 als Vollerhebung durchgeführte Gebäude- und Wohnungszählung liefert Informationen zu Gebäuden mit Wohnraum sowie zu den darin befindlichen Wohnungen. Zu rein gewerblich genutzten Objekten werden keine Informationen angeboten.

Durch das statistische Verfahren der Haushaltegenerierung stehen nicht nur die gesammelten Informationen zu Bevölkerung, Gebäuden und Wohnungen zur Verfügung, sondern zusätzlich auch Angaben zu Haushalts- und Familienstrukturen. Dabei wurden anschriftenweise Personen zu Haushalten zusammengefasst und den in der Gebäude- und Wohnungszählung erfassten Wohnungen zugeordnet. Die Haushaltegenerierung bildet daher die Wohnhaushalte an einer Anschrift ab. Die Zahl der Haushalte kann von der Zahl der bewohnten Wohnungen abweichen, da ein Haushalt beispielsweise bei Umzügen vorübergehend mehrere Wohnungen nutzen kann.

Für Gemeinden, die weniger als 10 000 Einwohnerinnen und Einwohner aufwiesen, gibt es aufgrund der rechtlichen Vorgaben und aus methodischen Gründen keine Auswertungen zu Migration, Bildung und Erwerbstätigkeit. Für Gemeinden mit mindestens 10 000 Einwohnern sowie flächendeckend ab Kreis- bis zur Bundesebene können hingegen auch die Ergebnisse der Haushaltebefragung auf Stichprobenbasis ausgewiesen werden. Die Zuordnung der Gemeinden zu einer Gemeindegrößenklasse nach § 2 Abs. 6 ZensG 2011 erfolgte anhand der amtlich fortgeschriebenen Bevölkerungszahl zum 31. Dezember 2009 bzw. 1. Januar 2010.

Die in der Zensusdatenbank veröffentlichten Ergebnisse zur Bevölkerung, Haushalten und Familien wurden wie folgt ermittelt:

- Für Gemeinden mit weniger als 10 000 Einwohnerinnen und Einwohner basieren die demografischen Ergebnisse und Ergebnisse zur Religion auf den Angaben aus den Melderegistern, korrigiert um die Ergebnisse aus der Befragung zur Klärung von Unstimmigkeiten und der Mehrfachfallprüfung. Für Gemeinden mit mindestens 10 000 Einwohnerinnen und Einwohner basieren die demografischen Ergebnisse auf den Angaben aus den Melderegistern, korrigiert um die Ergebnisse aus der Haushaltebefragung auf Stichprobenbasis und der Mehrfachfallprüfung.
- In Wohnheimen und Gemeinschaftsunterkünften (Sonderbereiche) wurde eine Vollerhebung durchgeführt, die ebenfalls zu einer Korrektur der ggf. abweichenden Angaben aus den Melderegistern führte.
- Die Ergebnisse zu Haushalts- und Familienmerkmalen wurden im Rahmen der Haushaltegenerierung ermittelt.
- Bei erwerbsstatistischen Auswertungen werden Auszählungen von Erwerbsregisterangaben mit Hochrechnungen der Ergebnisse aus der Haushaltebefragung auf Stichprobenbasis kombiniert.
- Die zu den Themenbereichen Religion (ausführlich), Migration und Bildung veröffentlichten Ergebnisse basieren auf der Hochrechnung der Stichprobenbefunde aus der Haushaltebefragung.

Die hochgerechneten Ergebnisse werden auf volle zehn Personen gerundet ausgewiesen. Die in den Ergebnistabellen dargestellten Summenwerte werden stets auf Basis der nicht gerundeten Ausgangswerte ermittelt, weshalb diese von der Summe der ausgewiesenen Einzelwerte abweichen können.

Bei den hochgerechneten Zensusergebnissen aus der Haushaltsstichprobe werden die Ergebnisse mit zu geringen Besetzungszahlen nicht ausgewiesen, sondern durch einen Schrägstrich („/“) ersetzt.

Bei allen Veröffentlichungen der amtlichen Statistik in Deutschland sind die Einzelangaben der Befragten grundsätzlich geheim zu halten (§ 16 Bundesstatistikgesetz). Bei allen Ergebnisbestandteilen aus Registerauszählungen oder Vollerhebungen des Zensus 2011 erfolgt die Geheimhaltung durch das maschinelle, datenverändernde Verfahren SAFE (Verfahren zur sicheren Anonymisierung für Einzeldaten). Dieses Verfahren stellt sicher, dass bereits vor Erstellung einer Ergebnistabelle kein Datensatz vorhanden ist, welcher Rückschlüsse auf Einzelfälle zulässt.

Die Einwohnerzahl (Bevölkerung insgesamt) wird durch die statistische Geheimhaltung nicht verändert. Aus diesem Grund kann die Summe der Einzelergebnisse einer Tabelle von der Einwohnerzahl abweichen.

Weiterführende methodische Informationen zum Zensusmodell und zur Geheimhaltung stehen unter [www.zensus2011.de](http://www.zensus2011.de) zur Verfügung.

Optimierung des Berechnungsverfahrens für die Ausgangsdaten der Bevölkerungsfortschreibung aus dem Zensus 2011

Die Statistischen Ämter des Bundes und der Länder haben die Berechnung der aus dem Zensus 2011 resultierenden Ausgangsdaten für die Bevölkerungsfortschreibung optimiert. Die durch den Zensus 2011 ermittelten und bereits im Jahr 2013 veröffentlichten Einwohnerzahlen sind von der nunmehr vorgenommenen Nachjustierung nicht betroffen und bleiben unverändert.

Das Verfahren zur Hochrechnung von Ergebnissen aus der Haushaltebefragung im Zensus 2011 war auf eine präzise Ermittlung der Gesamteinwohnerzahl der Gemeinden ausgerichtet.

Für Gemeinden mit 10 000 und mehr Einwohnern sind aus diesem Grund bei demografisch fein differenzierten Zensusergebnissen – insbesondere in bestimmten Kombinationen von Altersstufe und Geschlecht – teilweise auffällige Ergebnisse zustande gekommen.

Um nachteilige Konsequenzen für die laufende Bevölkerungsfortschreibung und die Berechnung demografischer Maße wie Geburten- und Sterbeziffern, die auf diesen Angaben aufbauen, auszuschließen, wurde die Kohortenberechnung (Aggregate der fortschreibungsrelevanten demografischen Untergliederungen) optimiert, welche die Auffälligkeiten in den Bevölkerungsstrukturen bereinigt, die Einwohnerzahlen aber unverändert lässt.

Verwendete Symbolik

| Symbol                                             | Erläuterung                                                                                                           |
|----------------------------------------------------|-----------------------------------------------------------------------------------------------------------------------|
| -                                                  | Nichts vorhanden <sup>1)</sup>                                                                                        |
| /                                                  | Keine Angabe, da Zahlenwert nicht sicher genug                                                                        |
| 0                                                  | Weniger als die Hälfte von 1 in der letzten besetzten Stelle, jedoch mehr als nichts                                  |
| ( )                                                | Aussagewert eingeschränkt, da der Zahlenwert durch das Geheimhaltungsverfahren relativ stark verändert wurde          |
| ·                                                  | Keine Angabe, da der Zahlenwert geheim zu halten ist oder durch das Geheimhaltungsverfahren zu stark verändert wurde. |
| Abweichungen in den Summen durch Runden der Zahlen |                                                                                                                       |

1) Dies kann ggf. durch das angewendete Geheimhaltungsverfahren bedingt sein.
